# Supplementary material for: Fine-tuning autophagy maximises lifespan and is associated with changes in mitochondrial gene expression in Drosophila
Source: PubMed Central journal article supplement (PMC7738165; doi:10.1371/journal.pgen.1009083), 2020-11-30
Supplement: pgen.1009083.s004.pdf [file pgen.1009083.s004.pdf]

Overlap Long-lived/Short-lived UP

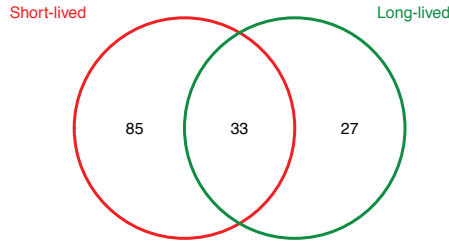

significance of result  $p= 4.95e-48$

Overlap Long-lived/Short-lived DOWN

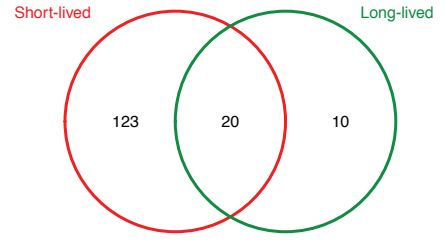

significance of result  $p= 6.1e-30$

Overlap Long-lived/Short-lived ALL

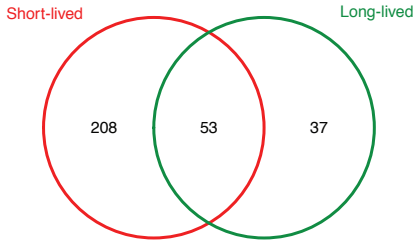

significance of result  $p= 1.31e-59$

Overlap Long-lived/Short-lived UP/DOWN

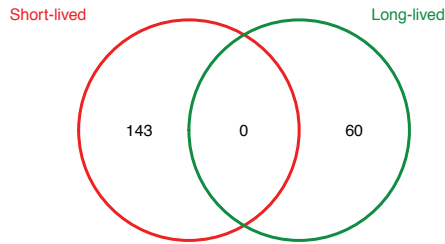

significance of result  $p= 1$

Overlap Long-lived/Short-lived DOWN/UP

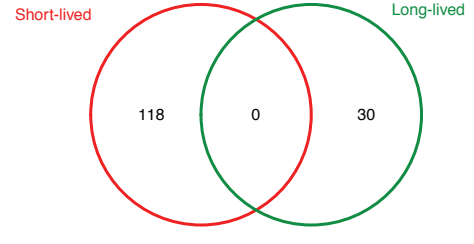

significance of result  $p= 1$

Intersection - up regulated genes

| Ensembl.Gene.ID | ID           | symbols | Description                                         |
|-----------------|--------------|---------|-----------------------------------------------------|
| FBgn0031945     | 1627069_at   | CG7191  | NA                                                  |
| FBgn0259711     | 1632958_a_at | CG42365 | NA                                                  |
| FBgn0039296     | 1623247_at   | CG10420 | NA                                                  |
| FBgn0001258     | 1635227_at   | ImpL3   | Ecdysone-inducible gene L3                          |
| FBgn0033945     | 1635030_at   | CG12868 | NA                                                  |
| FBgn0033477     | 1627152_at   | CG12918 | NA                                                  |
| FBgn0039788     | 1634343_at   | Rpt6R   | NA                                                  |
| FBgn0028523     | 1635109_at   | CG5888  | NA                                                  |
| FBgn0030348     | 1638778_at   | CG10352 | NA                                                  |
| FBgn0027095     | 1639410_at   | Manf    | Mesencephalic astrocyte-derived neurotrophic factor |
| FBgn0035996     | 1626220_at   | CG3448  | NA                                                  |
| FBgn0031547     | 1624817_at   | Sr-CIV  | NA                                                  |
| FBgn0020414     | 1626301_at   | Idgf3   | Imaginal disc growth factor 3                       |
| FBgn0020623     | 1632701_at   | Pal     | NA                                                  |
| FBgn0037151     | 1628660_at   | CG7130  | NA                                                  |
| FBgn0028695     | 1637349_at   | Rpn1    | Rpn1                                                |
| FBgn0259152     | 1623888_at   | Cibn    | Caliban                                             |
| FBgn0032734     | 1623841_at   | CG15169 | NA                                                  |
| FBgn0037391     | 1633771_s_at | CG2017  | NA                                                  |
| FBgn0030614     | 1623482_at   | CG9072  | NA                                                  |
| FBgn0028684     | 1629676_at   | Tbp-1   | Tat-binding protein-1                               |
| FBgn0035165     | 1626382_s_at | CG13887 | NA                                                  |
| FBgn0036126     | 1628683_at   | CG6272  | NA                                                  |
| FBgn0020369     | 1639784_at   | Pros45  | Pros45                                              |
| FBgn0036210     | 1629287_at   | CG14130 | NA                                                  |
| FBgn0031267     | 1628514_at   | Ipk2    | Ipk2                                                |
| FBgn0038179     | 1635294_at   | CG9312  | NA                                                  |
| FBgn0029937     | 1635581_at   | CG8300  | NA                                                  |
| FBgn0050022     | 1628558_at   | CG30022 | NA                                                  |
| FBgn0033672     | 1627697_at   | rho-7   | rhomboid-7                                          |
| FBgn0036196     | 1640228_at   | CG11658 | NA                                                  |
| FBgn0261396     | 1628269_at   | Rpn3    | Regulatory particle non-ATPase 3                    |
| FBgn0004595     | 1635500_a_at | pros    | prospero                                            |

Intersection - down regulated genes

| Ensembl.Gene.ID | ID           | symbols    | Description                               |
|-----------------|--------------|------------|-------------------------------------------|
| FBgn0010425     | 1637492_at   | epsilonTry | epsilonTrypsin                            |
| FBgn0039471     | 1635868_at   | CG6295     | NA                                        |
| FBgn0023197     | 1624824_at   | Jon74E     | Jonah 74E                                 |
| FBgn0002939     | 1632705_at   | ninaD      | neither inactivation nor afterpotential D |
| FBgn0033774     | 1638361_at   | CG12374    | NA                                        |
| FBgn0039342     | 1634240_at   | CG5107     | NA                                        |
| FBgn0039472     | 1629308_at   | CG17192    | NA                                        |
| FBgn0039311     | 1623265_at   | CG10513    | NA                                        |
| FBgn0030098     | 1634076_at   | CG12057    | NA                                        |
| FBgn0032913     | 1635498_at   | CG9259     | NA                                        |
| FBgn0039325     | 1627144_at   | CG10560    | NA                                        |
| FBgn0038718     | 1627080_at   | CG17752    | NA                                        |
| FBgn0038484     | 1640355_at   | CG5246     | NA                                        |
| FBgn0039470     | 1632215_at   | CG6296     | NA                                        |
| FBgn0039114     | 1636510_a_at | Lsd-1      | Lipid storage droplet-1                   |
| FBgn0032068     | 1625374_at   | CG9466     | NA                                        |
| FBgn0036738     | 1629476_at   | CG7542     | NA                                        |
| FBgn0010357     | 1630320_at   | betaTry    | betaTrypsin                               |
| FBgn0032049     | 1635453_at   | Bace       | beta-site APP-cleaving enzyme             |
| FBgn0030594     | 1631420_at   | CG9509     | NA                                        |

Figure S4.
