# Supplementary material for: Fine-tuning autophagy maximises lifespan and is associated with changes in mitochondrial gene expression in Drosophila
Source: PubMed Central journal article supplement (PMC7738165; doi:10.1371/journal.pgen.1009083), 2020-11-30
Supplement: pgen.1009083.s006.pdf [file pgen.1009083.s006.pdf]

A

■ UAS-Atg1(S) CSGAL4 tubGAL80 (long-lived)    ■ CSGAL4 tubGAL80  
■ UAS-Atg1(S) HRGAL4 tubGAL80 (short-lived)    ■ UAS-Atg1(S)

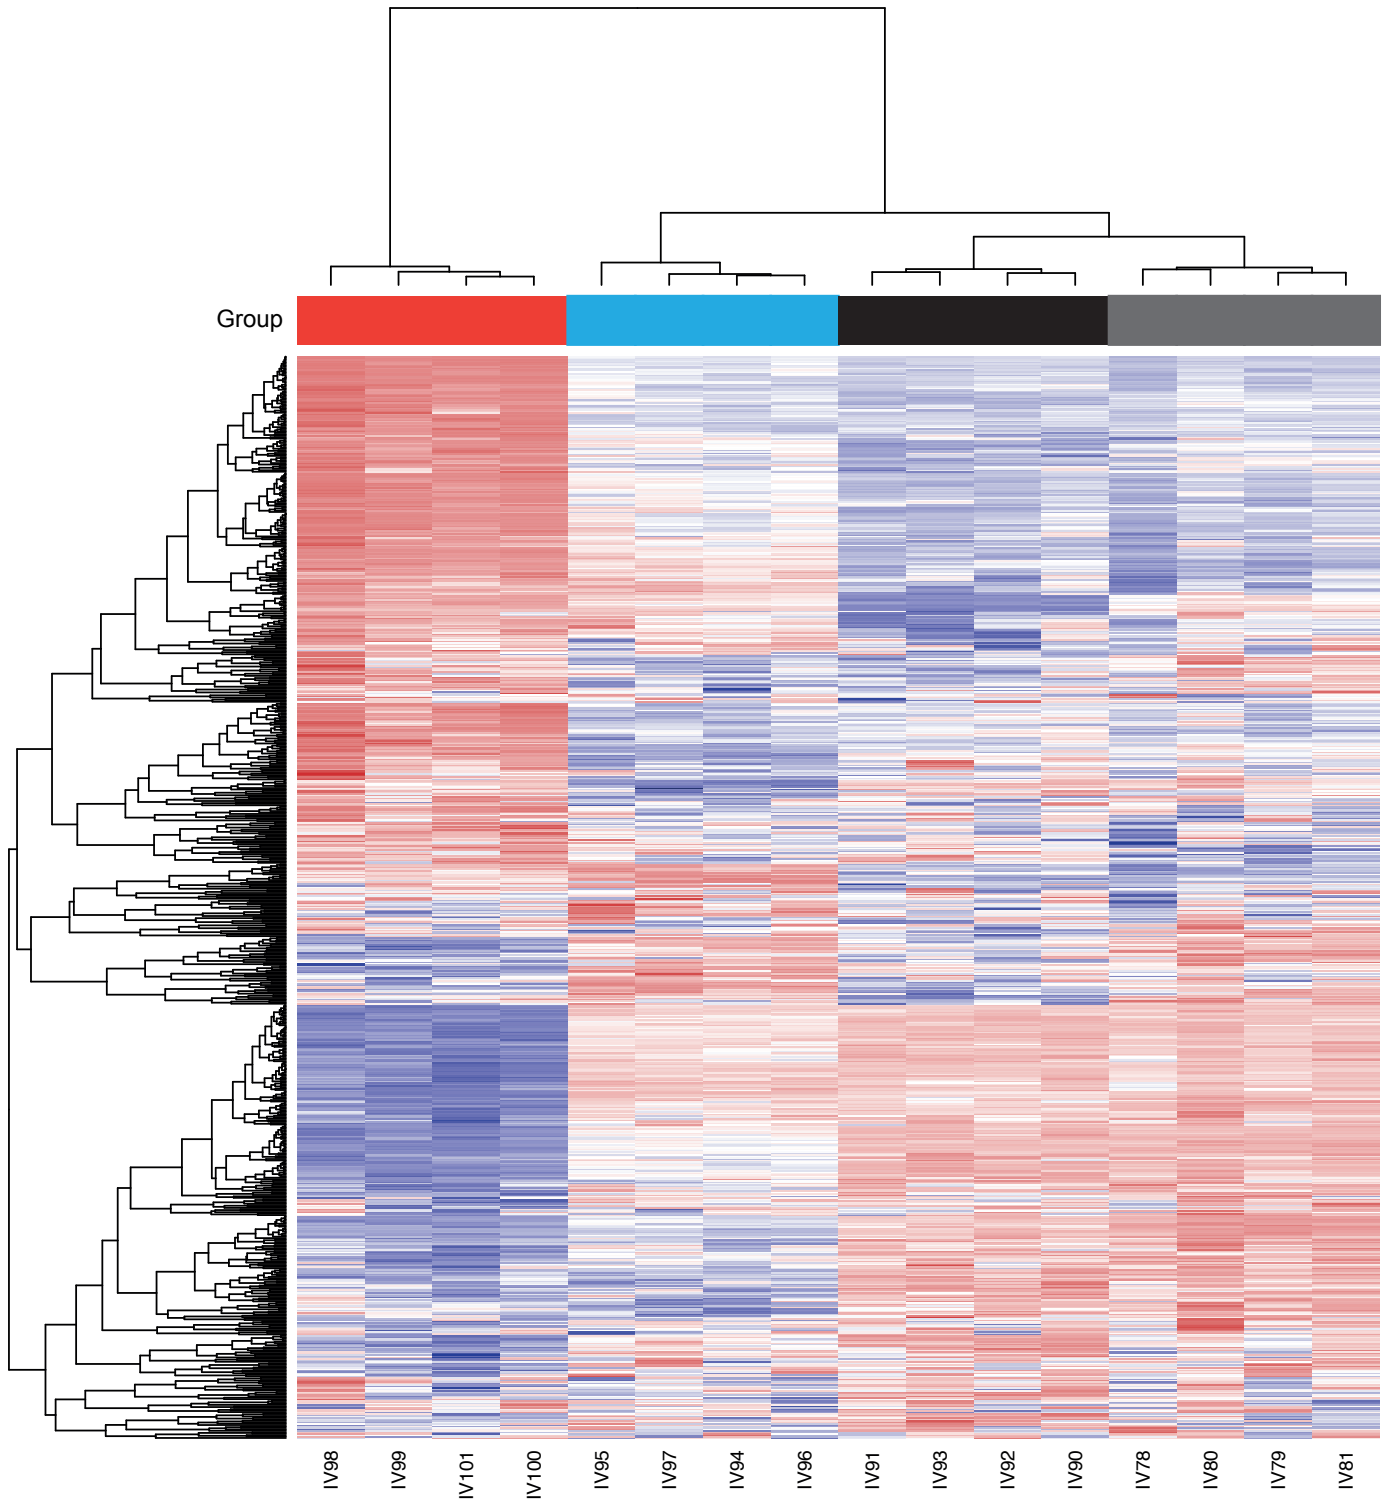

B

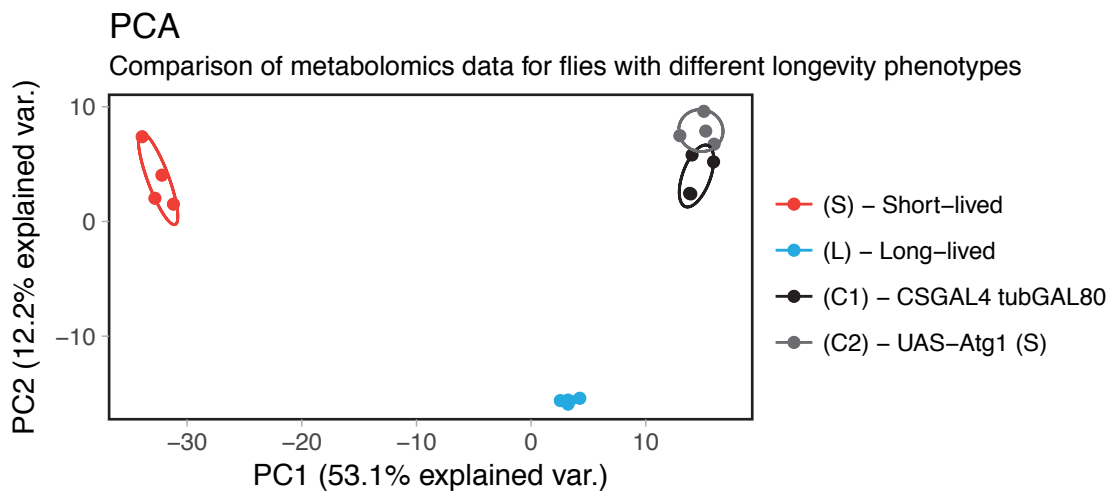

Figure S6
