# Supplementary material for: Fine-tuning autophagy maximises lifespan and is associated with changes in mitochondrial gene expression in Drosophila
Source: PubMed Central journal article supplement (PMC7738165; doi:10.1371/journal.pgen.1009083), 2020-11-30
Supplement: pgen.1009083.s007.pdf [file pgen.1009083.s007.pdf]

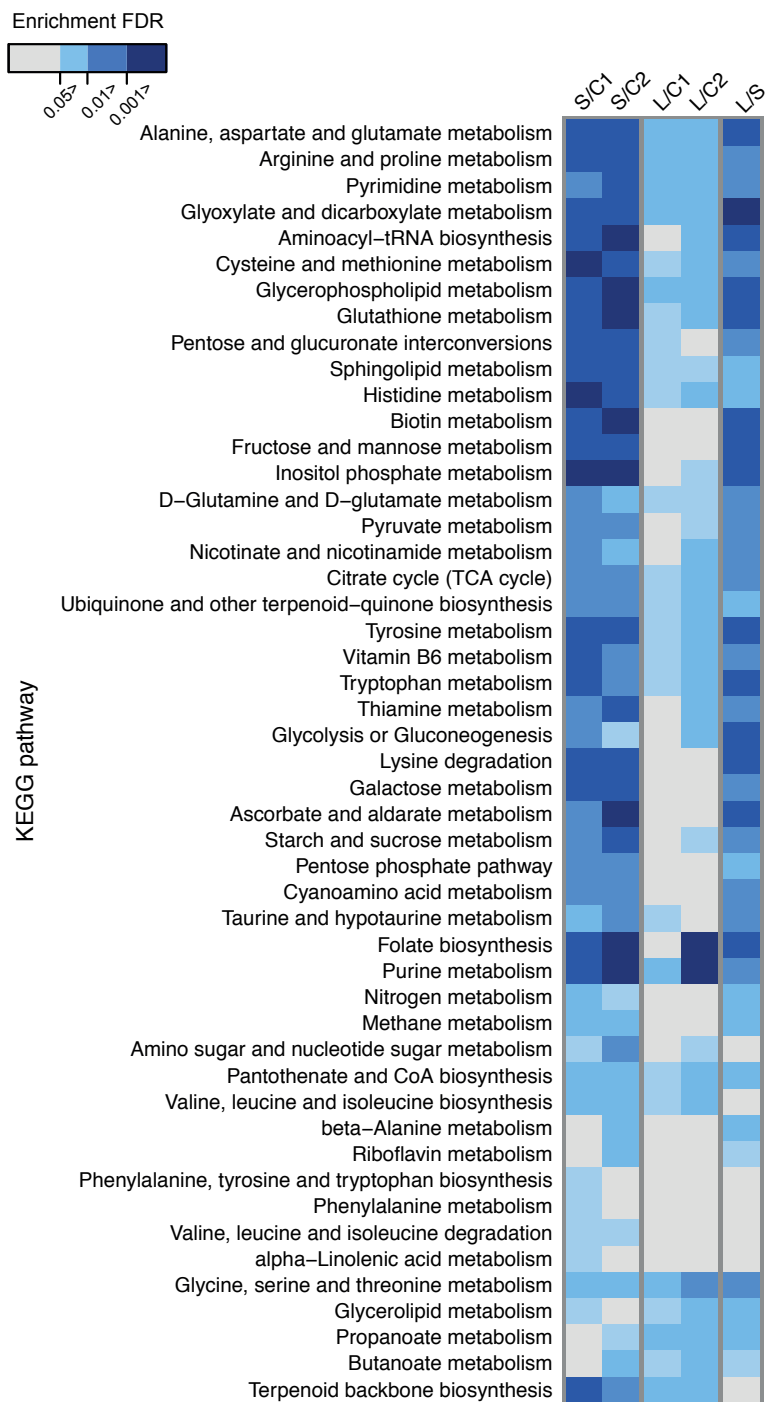

Figure S7
