# Supplementary material for: Fine-tuning autophagy maximises lifespan and is associated with changes in mitochondrial gene expression in Drosophila
Source: PubMed Central journal article supplement (PMC7738165; doi:10.1371/journal.pgen.1009083), 2020-11-30
Supplement: pgen.1009083.s010.pdf [file pgen.1009083.s010.pdf]

| long-lived (UAS-Atg1(W) CSGAL4 tubGAL80) vs GAL4 driver - down-regulated genes |         |         |         |           |               |               |         |             |          |         |                         |                         |
|--------------------------------------------------------------------------------|---------|---------|---------|-----------|---------------|---------------|---------|-------------|----------|---------|-------------------------|-------------------------|
| Ensembl.Gene.ID                                                                | logFC   | AveExpr | P.Value | adj.P.Val | driverControl | longLivedMutz | symbols | Description |          |         |                         |                         |
| FBgn0039471                                                                    | 1635868 | at      | -4.788  | 11.466    | 1.60E-12      | 5.30E-09      | 13.44   | 8.53        | CG6295   | CG6295  | NA                      | lipase                  |
| FBgn0039472                                                                    | 1629308 | at      | -6.562  | 9.631     | 5.50E-10      | 6.00E-07      | 12.47   | 5.59        | CG17192  | CG17192 | NA                      | lipase                  |
| FBgn0039470                                                                    | 1632215 | at      | -3.602  | 9.197     | 2.60E-08      | 7.10E-06      | 10.95   | 6.92        | CG6296   | CG6296  | NA                      | lipase                  |
| FBgn0039114                                                                    | 1636510 | a_at    | -1.162  | 11.668    | 2.60E-08      | 7.20E-06      | 12.31   | 10.86       | Lsd-1    | CG10374 | Lipid storage droplet-1 | lipid droplet           |
| FBgn0031069                                                                    | 1629413 | at      | -0.777  | 11.919    | 2.50E-07      | 2.80E-05      | 12.15   | 11.52       | CG12703  | CG12703 | NA                      | peroxisome              |
| FBgn0031533                                                                    | 1633709 | at      | -1.389  | 8.982     | 8.80E-06      | 0.00027       | 9.62    | 8.22        | CG2772   | CG2772  | NA                      | lipase                  |
| FBgn0031449                                                                    | 1639286 | s_at    | -0.696  | 10.259    | 9.90E-06      | 3.00E-04      | 10.54   | 9.87        | CG31689  | CG31689 | NA                      | lipid metabolism        |
| FBgn0038795                                                                    | 1638038 | at      | -0.745  | 8.822     | 1.00E-05      | 3.00E-04      | 9.13    | 8.38        | CG4335   | CG4335  | NA                      | b-oxidation*            |
| FBgn0030013                                                                    | 1628080 | at      | -0.832  | 9.757     | 1.00E-05      | 3.00E-04      | 10.18   | 9.22        | Gllspla2 | CG1583  | NA                      | lipase                  |
| FBgn0036996                                                                    | 1636583 | at      | -1.648  | 12.013    | 1.40E-05      | 0.00037       | 12.68   | 11.14       | CG5932   | CG5932  | NA                      | lipase                  |
| FBgn0030608                                                                    | 1637359 | at      | -0.585  | 11.382    | 1.80E-05      | 0.00043       | 11.64   | 11.05       | Lsd-2    | CG9057  | Lipid storage droplet-2 | lipase                  |
| FBgn0036449                                                                    | 1640754 | at      | -0.517  | 10.366    | 1.90E-05      | 0.00046       | 10.52   | 10.11       | bmm      | CG5295  | brummer                 | lipase                  |
| FBgn0027842                                                                    | 1626147 | s_at    | -0.897  | 11.774    | 3.00E-05      | 0.00062       | 12.26   | 11.22       | CPTI     | CG12891 | NA                      | b-oxidation*            |
| FBgn0035169                                                                    | 1629606 | at      | -0.408  | 9.325     | 3.60E-05      | 7.00E-04      | 9.47    | 9.09        | CG13890  | CG13890 | NA                      | b-oxidation             |
| FBgn0051414                                                                    | 1630993 | at      | -0.537  | 6.305     | 3.70E-05      | 0.00071       | 6.33    | 6.15        | CG31414  | CG31414 | NA                      | sphingolipid metabolism |

| long-lived (UAS-Atg1(W) CSGAL4 tubGAL80) vs GAL4 driver - up-regulated genes |         |         |         |           |               |               |         |             |         |         |                                 |                         |
|------------------------------------------------------------------------------|---------|---------|---------|-----------|---------------|---------------|---------|-------------|---------|---------|---------------------------------|-------------------------|
| Ensembl.Gene.ID                                                              | logFC   | AveExpr | P.Value | adj.P.Val | driverControl | longLivedMutz | symbols | Description |         |         |                                 |                         |
| FBgn0051148                                                                  | 1637647 | at      | 0.792   | 11.691    | 2.90E-07      | 3.00E-05      | 11.37   | 12.18       | CG31148 | CG31148 | NA                              | sphingolipid metabolism |
| FBgn0261283                                                                  | 1628292 | s_at    | 0.38    | 10.355    | 5.30E-06      | 2.00E-04      | 10.27   | 10.56       | HLH106  | CG8522  | Helix loop helix protein 106    | SREBP pathway           |
| FBgn0031381                                                                  | 1625334 | at      | 0.668   | 11.241    | 1.10E-05      | 0.00032       | 11      | 11.59       | Npc2a   | CG7291  | Niemann-Picktype C-2a           | sterol traffic          |
| FBgn0025373                                                                  | 1628428 | at      | 0.508   | 10.3      | 2.30E-05      | 0.00051       | 10.12   | 10.58       | Fpps    | CG12389 | Farnesyl pyrophosphate synthase | isoprenoid biosynthesis |

| short-lived (UAS-Atg1(S) HRGAL4 tubGAL80) vs GAL4 driver - down-regulated genes |         |         |         |           |               |               |         |             |          |         |                                       |                      |
|---------------------------------------------------------------------------------|---------|---------|---------|-----------|---------------|---------------|---------|-------------|----------|---------|---------------------------------------|----------------------|
| Ensembl.Gene.ID                                                                 | logFC   | AveExpr | P.Value | adj.P.Val | driverControl | longLivedMutz | symbols | Description |          |         |                                       |                      |
| FBgn0004047                                                                     | 1631419 | at      | -5.551  | 12.341    | 8.60E-20      | 4.30E-16      | 14.15   | 8.6         | Yp3      | CG11129 | Yolk protein 3                        | lipase               |
| FBgn0039114                                                                     | 1636510 | a_at    | -3.968  | 10.931    | 1.30E-16      | 1.80E-13      | 12.23   | 8.26        | Lsd-1    | CG10374 | Lipid storage droplet-1               | lipid droplet        |
| FBgn0039470                                                                     | 1632215 | at      | -6.677  | 7.998     | 6.60E-15      | 1.50E-12      | 10.56   | 3.89        | CG6296   | CG6296  | NA                                    | lipase               |
| FBgn0039472                                                                     | 1629308 | at      | -6.841  | 10.076    | 5.90E-14      | 7.00E-12      | 12.17   | 5.33        | CG17192  | CG17192 | NA                                    | lipase               |
| FBgn0027571                                                                     | 1624549 | at      | -1.383  | 13.269    | 9.00E-14      | 8.70E-12      | 13.69   | 12.31       | CG3523   | CG3523  | NA                                    | fatty acid synthesis |
| FBgn0036996                                                                     | 1636583 | at      | -5.701  | 10.656    | 1.00E-13      | 9.40E-12      | 12.42   | 6.72        | CG5932   | CG5932  | NA                                    | lipase               |
| FBgn0005391                                                                     | 1623655 | at      | -1.98   | 13.537    | 1.30E-13      | 1.10E-11      | 14.16   | 12.18       | Yp2      | CG2979  | Yolk protein 2                        | lipase               |
| FBgn0030608                                                                     | 1637359 | at      | -1.527  | 11.07     | 6.80E-13      | 3.40E-11      | 11.56   | 10.03       | Lsd-2    | CG9057  | Lipid storage droplet-2               | lipid droplet        |
| FBgn0031362                                                                     | 1634296 | s_at    | -1.674  | 10.615    | 6.90E-13      | 3.40E-11      | 11.13   | 9.45        | CG17646  | CG17646 | NA                                    | lipid metabolism     |
| FBgn0031533                                                                     | 1633709 | at      | -4.116  | 8.142     | 7.80E-13      | 3.70E-11      | 9.13    | 5.01        | CG2772   | CG2772  | NA                                    | lipase               |
| FBgn0038795                                                                     | 1638038 | at      | -1.904  | 8.575     | 8.30E-13      | 3.80E-11      | 9.14    | 7.24        | CG4335   | CG4335  | NA                                    | b-oxidation*         |
| FBgn0037782                                                                     | 1633050 | at      | -5.248  | 9.814     | 1.40E-12      | 5.50E-11      | 11.26   | 6.02        | Npc2d    | CG12813 | Niemann-Picktype C-2d                 | sterol traffic       |
| FBgn0039471                                                                     | 1635868 | at      | -6.813  | 11.155    | 2.90E-12      | 9.40E-11      | 13.34   | 6.53        | CG6295   | CG6295  | NA                                    | lipase               |
| FBgn0039755                                                                     | 1638528 | at      | -0.865  | 10.881    | 5.40E-12      | 1.40E-10      | 11.2    | 10.33       | CG15531  | CG15531 | NA                                    | lipid metabolism     |
| FBgn0004045                                                                     | 1629545 | at      | -0.789  | 14.207    | 6.00E-12      | 1.50E-10      | 14.45   | 13.66       | Yp1      | CG2985  | Yolk protein 1                        | lipase               |
| FBgn0021765                                                                     | 1634433 | at      | -0.81   | 11.986    | 1.40E-11      | 2.80E-10      | 12.22   | 11.41       | scu      | CG7113  | scully                                | b-oxidation          |
| FBgn0035811                                                                     | 1626566 | at      | -1.199  | 11.786    | 2.30E-11      | 4.10E-10      | 12.22   | 11.02       | CG12262  | CG12262 | NA                                    | b-oxidation          |
| FBgn0034629                                                                     | 1633476 | at      | -1.58   | 10.269    | 3.30E-11      | 5.60E-10      | 10.66   | 9.08        | Aox57D-d | CG9709  | acyl-Coenzyme A oxidase at 57D distal | b-oxidation          |
| FBgn0031813                                                                     | 1637461 | at      | -1.07   | 11.081    | 4.20E-11      | 6.60E-10      | 11.38   | 10.31       | CG9527   | CG9527  | NA                                    | b-oxidation          |
| FBgn0004797                                                                     | 1636579 | s_at    | -1.117  | 9.036     | 4.40E-11      | 6.90E-10      | 9.41    | 8.29        | mdy      | CG31991 | midway                                | lipid synthesis      |
| FBgn0032029                                                                     | 1628290 | s_at    | -0.978  | 10.306    | 4.50E-11      | 7.00E-10      | 10.49   | 9.51        | CG17292  | CG17292 | NA                                    | lipase               |

| short-lived (UAS-Atg1(S) HRGAL4 tubGAL80) vs GAL4 driver - up-regulated genes |         |         |         |           |               |               |         |             |        |        |                                        |               |
|-------------------------------------------------------------------------------|---------|---------|---------|-----------|---------------|---------------|---------|-------------|--------|--------|----------------------------------------|---------------|
| Ensembl.Gene.ID                                                               | logFC   | AveExpr | P.Value | adj.P.Val | driverControl | longLivedMutz | symbols | Description |        |        |                                        |               |
| FBgn0261283                                                                   | 1628292 | s_at    | 1.278   | 10.678    | 1.70E-15      | 7.00E-13      | 10.23   | 11.51       | HLH106 | CG8522 | Helix loop helix protein 106           | SREBP pathway |
| FBgn0039474                                                                   | 1636343 | at      | 3.334   | 9.391     | 3.30E-14      | 4.80E-12      | 8.47    | 11.8        | CG6283 | CG6283 | NA                                     | lipase        |
| FBgn0031881                                                                   | 1629040 | at      | 1.351   | 8.725     | 9.10E-14      | 8.70E-12      | 8.13    | 9.48        | CG3476 | CG3476 | NA                                     | b-oxidation   |
| FBgn0033226                                                                   | 1638693 | s_at    | 1.024   | 11.454    | 4.70E-12      | 1.30E-10      | 11.06   | 12.09       | CG1882 | CG1882 | NA                                     | lipase        |
| FBgn0041342                                                                   | 1629930 | s_at    | 0.974   | 9.723     | 5.00E-11      | 7.60E-10      | 9.42    | 10.4        | Cct1   | CG1049 | CTP:phosphocholine cytidylyl transfer. | SREBP pathway |

Table S1.
