# Supplementary material for: Fine-tuning autophagy maximises lifespan and is associated with changes in mitochondrial gene expression in Drosophila
Source: PLoS Genet. 2020 Nov 30;16(11):e1009083. doi: 10.1371/journal.pgen.1009083 (PMC7738165; doi:10.1371/journal.pgen.1009083)
Supplement: S1 Data — (XLSX) [file pgen.1009083.s009.xlsx]

## Sheet: totalRNA_ShortLivedMutant-UASCt
Ensembl.Gene.ID	ID	logFC	AveExpr	P.Value	adj.P.Val	UAScontrol_Mean	shortLivedMutant_Mean	symbols	FLYBASECG	Description
NA	1627886_at	4.466	11.194	4e-21	4e-17	9.64	14.11	NA	NA	NA			Short-lived mutant HRGAL4 tubGAL80ts > UAS-Atg1(S)
FBgn0004047	1631419_at	-5.678	12.341	6.2e-20	3.1e-16	14.28	8.6	Yp3	CG11129	Yolk protein 3			versus
FBgn0032913	1635498_at	-5.523	10.156	8.9e-18	3e-14	12.13	6.61	CG9259	CG9259	NA			UAS-Atg1(S) control
FBgn0037071	1627004_at	1.758	9.224	2.1e-17	5.1e-14	8.56	10.31	CG7632	CG7632	NA
FBgn0039313	1624892_s_at	-4.738	10.91	3.7e-17	7.4e-14	12.76	8.02	CG11892	CG11892	NA
FBgn0039311	1623265_at	-4.697	10.715	5e-17	7.8e-14	12.67	7.97	CG10513	CG10513	NA
FBgn0032144	1625948_at	-4.405	12.129	5.5e-17	7.8e-14	13.62	9.21	CG17633	CG17633	NA
FBgn0039114	1636510_a_at	-4.051	10.931	9.4e-17	1.1e-13	12.31	8.26	Lsd-1	CG10374	Lipid storage droplet-1
FBgn0039325	1627144_at	-4.533	9.891	1e-16	1.1e-13	11.56	7.03	CG10560	CG10560	NA
FBgn0010425	1637492_at	-5.194	12.077	1.8e-16	1.5e-13	13.83	8.64	epsilonTry	CG18681	epsilonTrypsin
FBgn0039312	1638424_at	-4.755	10.841	1.8e-16	1.5e-13	12.78	8.03	CG10514	CG10514	NA
FBgn0037852	1641606_s_at	1.818	9.284	1.9e-16	1.5e-13	8.65	10.47	CG6608	CG6608	Thiamine pyrophosphate carrier protein 1
FBgn0002939	1632705_at	-5.413	8.392	1.9e-16	1.5e-13	10.57	5.15	ninaD	CG31783	neither inactivation nor afterpotential D
FBgn0036738	1629476_at	-4.569	11.722	2.4e-16	1.7e-13	13.36	8.79	CG7542	CG7542	NA
FBgn0035781	1639641_at	-4.015	11.709	3.2e-16	2.1e-13	13.09	9.07	CG8560	CG8560	NA
FBgn0039840	1638649_at	-3.418	7.141	3.5e-16	2.2e-13	8.99	5.57	CG11340	CG11340	NA
FBgn0039296	1623247_at	3.257	8.945	4.1e-16	2.4e-13	7.95	11.21	CG10420	CG10420	NA
FBgn0034479	1625584_at	-4.376	10.445	6.4e-16	3.4e-13	11.95	7.58	CG8654	CG8654	NA
FBgn0037151	1628660_at	2.041	7.812	6.5e-16	3.4e-13	7.15	9.19	CG7130	CG7130	NA
FBgn0039328	1638852_at	1.785	7.753	6.9e-16	3.4e-13	7.11	8.9	CHKov2	CG10675	CHKov2
FBgn0033423	1633047_at	-4.162	9.585	7.4e-16	3.5e-13	11.02	6.86	CG1809	CG1809	NA
FBgn0037678	1627657_at	-2.532	11.562	7.6e-16	3.5e-13	12.37	9.83	CG16749	CG16749	NA
FBgn0039788	1634343_at	2.627	5.519	8.7e-16	3.6e-13	4.72	7.35	Rpt6R	CG2241	NA
NA	1633401_s_at	-3.611	7.931	8.9e-16	3.6e-13	9.35	5.74	NA	NA	NA
FBgn0037345	1637203_at	2.257	8.383	9e-16	3.6e-13	7.6	9.86	rev7	CG2948	rev7
FBgn0259711	1632958_a_at	1.992	7.917	9.6e-16	3.6e-13	7.2	9.19	CG42365	CG42365	NA
FBgn0033904	1633434_at	-2.37	7.704	1e-15	3.6e-13	8.57	6.2	CG18327	CG18327	NA
FBgn0001258	1635227_at	2.913	10.714	1e-15	3.6e-13	9.61	12.53	ImpL3	CG10160	Ecdysone-inducible gene L3
FBgn0032652	1629324_at	-4.021	8.156	1.2e-15	4.1e-13	9.47	5.45	CG6870	CG6870	NA
FBgn0030098	1634076_at	-7.905	11.289	1.5e-15	4.9e-13	13.99	6.08	CG12057	CG12057	NA
FBgn0036126	1628683_at	1.91	9.152	1.6e-15	4.9e-13	8.48	10.39	CG6272	CG6272	NA
FBgn0036381	1641270_at	-3.104	10.582	1.6e-15	4.9e-13	11.68	8.58	CG8745	CG8745	NA
FBgn0030614	1623482_at	3.419	4.818	1.7e-15	5.3e-13	3.64	7.05	CG9072	CG9072	NA
FBgn0033446	1634935_a_at	-3.576	11.883	1.9e-15	5.5e-13	13.05	9.47	CG1648	CG1648	NA
FBgn0032068	1625374_at	-5.361	9.018	2e-15	5.5e-13	11.37	6.01	CG9466	CG9466	NA
FBgn0033913	1641018_s_at	-1.895	9.925	2.2e-15	6.2e-13	10.74	8.85	CG8468	CG8468	NA
FBgn0002652	1641317_at	-2.426	7.605	2.9e-15	7.9e-13	8.39	5.97	squ	CG4711	squash
FBgn0035779	1630302_at	-3.291	10.833	3.1e-15	8e-13	12	8.71	CG8562	CG8562	NA
FBgn0261283	1628292_s_at	1.224	10.678	3.2e-15	8e-13	10.29	11.51	HLH106	CG8522	Helix loop helix protein 106
FBgn0033945	1635030_at	2.572	9.723	3.2e-15	8e-13	8.65	11.22	CG12868	CG12868	NA
FBgn0040718	1626439_at	-3.473	8.711	3.3e-15	8e-13	9.89	6.42	CG15353	CG15353	NA
FBgn0039474	1636343_at	3.905	9.391	3.4e-15	8e-13	7.9	11.8	CG6283	CG6283	NA
FBgn0038179	1635294_at	2.784	9.243	3.6e-15	8.3e-13	8.41	11.19	CG9312	CG9312	NA
FBgn0039736	1636979_at	-2.1	7.371	4.1e-15	9.2e-13	8.53	6.43	CG7912	CG7912	NA
FBgn0013307	1635318_at	-5.034	9.551	4.3e-15	9.5e-13	11.47	6.44	Odc1	CG8721	Ornithine decarboxylase 1
FBgn0030594	1631420_at	-1.93	12.256	5.5e-15	1.2e-12	12.87	10.94	CG9509	CG9509	NA
FBgn0031249	1624137_at	-4.037	12.282	5.6e-15	1.2e-12	13.67	9.63	CG11911	CG11911	NA
FBgn0035670	1629726_at	-2.275	12.841	7.2e-15	1.5e-12	13.65	11.38	CG10472	CG10472	NA
FBgn0039152	1634341_a_at	-4.343	7.377	7.3e-15	1.5e-12	8.99	4.64	CG6129	CG6129	NA
FBgn0036428	1632222_a_at	-1.898	11.869	7.8e-15	1.5e-12	12.5	10.61	CG9238	CG9238	NA
FBgn0036196	1640228_at	2.227	8.897	8.3e-15	1.6e-12	8.03	10.26	CG11658	CG11658	NA
FBgn0037391	1633771_s_at	2.342	9.765	8.5e-15	1.6e-12	8.96	11.31	CG2017	CG2017	NA
FBgn0050022	1628558_at	1.84	10.278	8.7e-15	1.6e-12	9.72	11.56	CG30022	CG30022	NA
FBgn0040319	1625362_at	-1.373	11.219	8.8e-15	1.6e-12	12.02	10.64	Gclc	CG2259	Glutamate-cysteine ligase catalytic subunit
FBgn0031305	1633826_at	-4.125	9.421	9e-15	1.6e-12	10.99	6.86	Iris	CG4715	Iris
FBgn0037807	1625688_at	-2.645	7.849	9.2e-15	1.6e-12	8.86	6.21	CG6293	CG6293	NA
FBgn0037203	1630957_s_at	-2.796	9.81	9.2e-15	1.6e-12	10.99	8.19	slif	CG11128	slimfast
FBgn0030817	1641207_s_at	-3.353	9.313	1.1e-14	1.9e-12	10.48	7.12	CG4991	CG4991	NA
FBgn0038718	1627080_at	-4.202	9.871	1.1e-14	1.9e-12	11.21	7.01	CG17752	CG17752	NA
FBgn0001128	1636311_at	-1.738	12.347	1.1e-14	1.9e-12	12.99	11.25	Gpdh	CG9042	Glycerol 3 phosphate dehydrogenase
FBgn0037230	1637385_a_at	-3.064	8.787	1.2e-14	2e-12	9.91	6.84	CG9780	CG9780	NA
FBgn0037819	1635321_at	-3.072	9.12	1.3e-14	2.1e-12	10.43	7.35	CG14688	CG14688	NA
FBgn0023197	1624824_at	-4.94	12.311	1.4e-14	2.2e-12	13.97	9.03	Jon74E	CG6298	Jonah 74E
FBgn0259682	1640505_at	-3.025	8.515	1.5e-14	2.2e-12	9.56	6.54	CG42351	CG42351	NA
FBgn0041094	1627101_at	1.92	11.535	1.5e-14	2.2e-12	10.75	12.67	scyl	CG7590	scylla
FBgn0029765	1626783_at	-3.419	9.749	1.5e-14	2.2e-12	10.99	7.57	CG16756	CG16756	NA
FBgn0031267	1628514_at	2.441	10.231	1.6e-14	2.2e-12	9.35	11.79	Ipk2	CG13688	Ipk2
FBgn0034052	1633031_at	-3.853	8.848	1.6e-14	2.2e-12	10.4	6.54	CG8299	CG8299	NA
FBgn0086346	1633505_at	1.288	10.454	1.6e-14	2.2e-12	9.95	11.24	ALiX	CG12876	ALG-2 interacting protein X
FBgn0036831	1625487_at	-3.775	9.238	1.6e-14	2.2e-12	10.65	6.87	CG6839	CG6839	NA
FBgn0085360	1624599_at	-2.664	8.729	1.7e-14	2.3e-12	9.72	7.05	CG34331	CG34331	NA
FBgn0259682	1633076_at	-3.036	10.394	1.8e-14	2.4e-12	11.44	8.41	CG42351	CG42351	NA
FBgn0039593	1634674_at	3.554	6.861	1.8e-14	2.4e-12	5.51	9.06	CG9989	CG9989	NA
FBgn0039472	1629308_at	-7.409	10.076	1.9e-14	2.5e-12	12.74	5.33	CG17192	CG17192	NA
FBgn0030776	1625212_at	-1.608	11.498	2.2e-14	2.9e-12	12.08	10.47	CG4653	CG4653	NA
FBgn0031533	1633709_at	-5.275	8.142	2.2e-14	2.9e-12	10.29	5.01	CG2772	CG2772	NA
FBgn0085281	1627065_at	-4.268	6.643	2.3e-14	3e-12	8.02	3.75	CG34252	CG34252	NA
FBgn0036023	1630598_at	-5.903	9.315	2.3e-14	2.9e-12	11.73	5.83	CG18179	CG18179	NA
FBgn0034756	1635593_at	2.506	9.156	2.4e-14	3e-12	8.33	10.83	Cyp6d2	CG4373	Cyp6d2
FBgn0001180	1624490_s_at	-3.136	7.512	2.5e-14	3.1e-12	8.54	5.4	hb	CG9786	hunchback
FBgn0038194	1638562_a_at	-1.959	12.25	2.5e-14	3.1e-12	12.84	10.88	Cyp6d5	CG3050	Cyp6d5
FBgn0053120	1635862_at	-2.764	8.444	2.6e-14	3.1e-12	9.58	6.82	CG33120	CG33120	NA
FBgn0031457	1630506_at	1.272	8.048	2.8e-14	3.4e-12	7.54	8.82	CG3077	CG3077	NA
FBgn0031805	1623438_at	3.277	7.65	2.9e-14	3.4e-12	6.59	9.86	CG9505	CG9505	NA
FBgn0031547	1624817_at	2.873	7.979	2.9e-14	3.4e-12	7.17	10.05	Sr-CIV	CG3212	NA
FBgn0027571	1624549_at	-1.494	13.269	3e-14	3.5e-12	13.8	12.31	CG3523	CG3523	NA
FBgn0033979	1639381_at	-3.705	8.439	3.1e-14	3.6e-12	9.63	5.93	Cyp6a19	CG10243	Cyp6a19
FBgn0034005	1632299_at	3.064	4.971	3.2e-14	3.6e-12	3.9	6.96	alphaPS4	CG16827	NA
FBgn0028978	1629044_at	1.271	7.946	3.3e-14	3.6e-12	7.46	8.73	trbl	CG5408	tribbles
FBgn0025595	1635442_a_at	-2.573	9.784	3.3e-14	3.6e-12	10.73	8.16	GRHR	CG11325	Gonadotropin-releasing hormone receptor
FBgn0039324	1625312_at	-2.241	10.416	3.3e-14	3.6e-12	11.2	8.96	CG10553	CG10553	NA
FBgn0038135	1635769_at	-2.904	10.733	3.4e-14	3.7e-12	12.25	9.34	CG8773	CG8773	NA
FBgn0017561	1635938_s_at	-3.288	8.212	3.6e-14	3.8e-12	9.43	6.15	Ork1	CG1615	Open rectifier K[+] channel 1
FBgn0028695	1637349_at	1.019	10.057	3.7e-14	3.9e-12	9.68	10.69	Rpn1	CG7762	Rpn1
FBgn0043783	1633684_at	-2.493	10.393	3.8e-14	4e-12	11.34	8.84	CG32444	CG32444	NA
FBgn0036996	1636583_at	-6.105	10.656	3.8e-14	4e-12	12.83	6.72	CG5932	CG5932	NA
FBgn0030839	1627400_a_at	1.547	5.995	4e-14	4e-12	5.43	6.97	CG5613	CG5613	NA
FBgn0020764	1632343_at	1.035	11.797	4e-14	4e-12	11.45	12.49	Alas	CG3017	Aminolevulinate synthase
FBgn0020414	1623643_s_at	1.604	11.351	4e-14	4e-12	10.73	12.33	Idgf3	CG4559	Imaginal disc growth factor 3
NA	1635878_s_at	-3.871	12.233	4e-14	4e-12	13.5	9.63	NA	NA	NA
FBgn0031460	1635897_at	-3.275	6.728	4.4e-14	4.3e-12	8.1	4.83	CG15399	CG15399	NA
FBgn0005670	1629875_a_at	-3.993	9.967	4.5e-14	4.4e-12	11.42	7.42	Cyp4d1	CG3656	Cytochrome P450-4d1
FBgn0029828	1623298_at	-2.236	9.885	4.5e-14	4.4e-12	10.81	8.57	CG6067	CG6067	NA
NA	1631333_s_at	-1.066	13.773	4.6e-14	4.4e-12	14.15	13.08	NA	NA	NA
FBgn0037144	1639587_s_at	-1.826	7.699	4.9e-14	4.7e-12	8.42	6.59	CG7458	CG7458	NA
FBgn0051205	1640666_at	4.385	6.196	5.1e-14	4.7e-12	4.86	9.24	CG31205	CG31205	NA
FBgn0030797	1626688_at	1.354	7.517	5.1e-14	4.7e-12	7.05	8.41	CG13004	CG13004	NA
FBgn0031069	1629413_at	-1.773	11.904	5.2e-14	4.7e-12	12.7	10.92	CG12703	CG12703	NA
FBgn0029937	1635581_at	1.666	8.12	5.2e-14	4.7e-12	7.48	9.14	CG8300	CG8300	NA
FBgn0002948	1639689_at	-2.318	7.163	5.3e-14	4.8e-12	7.96	5.65	nod	CG1763	no distributive disjunction
FBgn0028694	1628531_at	0.962	11.256	5.5e-14	4.9e-12	10.89	11.85	Rpn11	CG18174	Rpn11
FBgn0005391	1623655_at	-2.106	13.537	5.5e-14	4.9e-12	14.28	12.18	Yp2	CG2979	Yolk protein 2
FBgn0031068	1630885_at	1.599	8.946	5.7e-14	5e-12	8.43	10.02	Alr	CG12534	Augmenter of liver regeneration
FBgn0033774	1638361_at	-7.526	11.88	5.7e-14	5e-12	14.43	6.9	CG12374	CG12374	NA
FBgn0039678	1633305_at	-5.051	9.527	5.8e-14	5e-12	11.08	6.03	Obp99a	CG18111	Odorant-binding protein 99a
FBgn0033188	1638498_s_at	1.263	11.966	5.8e-14	5e-12	11.36	12.62	CG1600	CG1600	NA
FBgn0030080	1635287_at	1.954	6.824	5.8e-14	5e-12	6.34	8.3	CG15366	CG15366	NA
FBgn0030968	1623769_at	-1.665	10.207	5.9e-14	5e-12	11.12	9.46	CG7322	CG7322	NA
FBgn0013763	1641259_at	-1.355	11.384	6.1e-14	5.1e-12	11.87	10.51	Chit	CG5210	NA
FBgn0038719	1629718_at	-2.807	7.375	6.4e-14	5.3e-12	8.2	5.39	CG16727	CG16727	NA
FBgn0035714	1626412_at	1.115	9.372	6.7e-14	5.4e-12	8.99	10.11	CG8549	CG8549	NA
FBgn0034490	1628721_at	-1.529	9.841	6.7e-14	5.4e-12	10.46	8.93	CG9864	CG9864	NA
FBgn0052259	1626328_at	3.491	5.141	6.8e-14	5.5e-12	3.85	7.34	CG32259	CG32259	NA
FBgn0039470	1632215_at	-5.656	7.998	7.2e-14	5.8e-12	9.54	3.89	CG6296	CG6296	NA
FBgn0015568	1623885_at	-1.955	8.315	7.5e-14	6e-12	9.2	7.24	alpha-Est1	CG1031	alpha-Esterase-1
FBgn0027341	1634707_s_at	1.6	9.973	7.7e-14	6.1e-12	9.26	10.86	Gfat1	CG12449	Glutamine:fructose-6-phosphate aminotransferase 1
FBgn0032049	1635453_at	-1.523	13.733	7.9e-14	6.2e-12	14.28	12.75	Bace	CG13095	beta-site APP-cleaving enzyme
FBgn0050000	1631513_at	1.113	10.009	7.9e-14	6.2e-12	9.55	10.67	CG30000	CG30000	NA
FBgn0052483	1628500_at	-3.706	9.634	8.3e-14	6.3e-12	10.87	7.16	CG32483	CG32483	NA
FBgn0000615	1639059_s_at	-2.845	9.057	8.3e-14	6.3e-12	10.01	7.16	exu	CG8994	exuperantia
FBgn0036024	1638413_at	-5.447	11.895	8.7e-14	6.6e-12	13.77	8.33	CG18180	CG18180	NA
FBgn0052179	1628325_at	1.411	8.865	8.9e-14	6.7e-12	8.36	9.77	Krn	CG32179	Keren
FBgn0039645	1628954_at	-2.059	6.998	9.1e-14	6.8e-12	8.39	6.33	CG11898	CG11898	NA
FBgn0039873	1633425_at	-2.587	10.519	9.4e-14	6.9e-12	11.75	9.16	Smvt	CG2191	Sodium-dependent multivitamin transporter
FBgn0028523	1635109_at	2.124	7.121	9.4e-14	6.9e-12	6.35	8.47	CG5888	CG5888	NA
FBgn0086915	1628256_at	-2.421	4.728	1e-13	7.3e-12	6.37	3.95	Mst77F	CG3354	NA
FBgn0037715	1638009_s_at	-1.272	11.328	1.1e-13	8.2e-12	11.83	10.55	CG9399	CG9399	NA
FBgn0036833	1629184_at	-2.522	11.358	1.1e-13	8.2e-12	12.34	9.82	CG3819	CG3819	NA
FBgn0037011	1625315_at	1.099	10.074	1.2e-13	8.3e-12	9.72	10.82	CG4858	CG4858	NA
FBgn0039208	1629776_a_at	1.817	9.292	1.2e-13	8.8e-12	8.72	10.54	CG6643	CG6643	NA
FBgn0031860	1626613_at	-2.778	7.444	1.3e-13	9.1e-12	8.64	5.86	CG11236	CG11236	NA
FBgn0030510	1637835_at	1.779	8.177	1.3e-13	9.3e-12	7.49	9.27	CG12177	CG12177	NA
FBgn0003067	1633599_a_at	-3.33	12.4	1.4e-13	9.8e-12	13.52	10.19	Pepck	CG17725	Phosphoenolpyruvate carboxykinase
NA	1639430_at	1.02	8.554	1.4e-13	9.9e-12	8.2	9.22	NA	NA	NA
FBgn0011204	1633400_at	-1.076	10.478	1.5e-13	9.9e-12	10.83	9.76	cue	CG12086	cueball
FBgn0031417	1628013_at	-2.596	8.87	1.5e-13	9.9e-12	9.95	7.36	CG3597	CG3597	NA
FBgn0026144	1636840_at	-3.026	7.22	1.5e-13	9.9e-12	8.16	5.13	CBP	CG1435	sarcoplasmic calcium-binding protein
FBgn0001257	1636202_s_at	1.79	11.413	1.5e-13	9.9e-12	10.63	12.42	ImpL2	CG15009	Ecdysone-inducible gene L2
FBgn0042712	1624135_at	1.214	9.4	1.5e-13	9.9e-12	8.98	10.2	HBS1	CG1898	HBS1
FBgn0037782	1633050_at	-6.145	9.814	1.5e-13	9.9e-12	12.16	6.02	Npc2d	CG12813	Niemann-Pick type C-2d
FBgn0035165	1626382_s_at	1.17	11.913	1.5e-13	9.9e-12	11.5	12.67	CG13887	CG13887	NA
FBgn0035476	1635410_at	2.186	9.342	1.5e-13	9.9e-12	8.29	10.48	CG12766	CG12766	NA
FBgn0025620	1641711_at	-3.99	8.713	1.5e-13	9.9e-12	10.32	6.33	CG13360	CG13360	NA
FBgn0034935	1628567_at	1.965	6.86	1.5e-13	9.9e-12	6.22	8.19	CG13565	CG13565	NA
FBgn0028411	1629881_at	1.412	9.958	1.6e-13	1e-11	9.42	10.83	Nxt1	CG12752	NTF2-related export protein 1
FBgn0040717	1624362_at	-2.109	6.751	1.6e-13	1e-11	7.58	5.47	Nplp4	CG15361	Neuropeptide-like precursor 4
FBgn0031814	1632361_at	-2.178	9.343	1.6e-13	1e-11	10.13	7.96	retm	CG9528	real-time
NA	1623357_at	1.032	7.618	1.6e-13	1e-11	7.26	8.29	NA	NA	NA
FBgn0034808	1625833_at	-1.868	10.012	1.7e-13	1.1e-11	10.66	8.79	CG9896	CG9896	NA
FBgn0035283	1639052_a_at	-1.116	8.862	1.8e-13	1.1e-11	9.25	8.13	CG12024	CG12024	NA
FBgn0031945	1627069_at	2.448	9.008	1.8e-13	1.1e-11	8.34	10.79	CG7191	CG7191	NA
FBgn0034279	1641582_at	2.364	7.932	1.8e-13	1.1e-11	6.99	9.36	CG18635	CG18635	NA
FBgn0033672	1627697_at	0.995	8.563	1.9e-13	1.2e-11	8.26	9.25	rho-7	CG8972	rhomboid-7
FBgn0038795	1638038_at	-2.104	8.575	2e-13	1.2e-11	9.34	7.24	CG4335	CG4335	NA
FBgn0001187	1630147_at	-1.779	9.383	2e-13	1.2e-11	9.96	8.18	Hex-C	CG8094	Hexokinase C
FBgn0003525	1633174_at	-2.871	8.42	2e-13	1.2e-11	9.27	6.4	stg	CG1395	string
FBgn0026576	1629153_s_at	-2.35	9.62	2e-13	1.2e-11	10.62	8.27	CG5991	CG5991	NA
FBgn0035886	1625538_at	-4.235	10.377	2e-13	1.2e-11	12.01	7.77	Jon66Ci	CG7118	Jonah 66Ci
FBgn0020369	1639784_at	0.752	11.133	2e-13	1.2e-11	10.88	11.63	Pros45	CG1489	Pros45
FBgn0025381	1637328_at	0.892	10.8	2e-13	1.2e-11	10.49	11.38	CG14782	CG14782	NA
NA	1631336_at	1.709	5.697	2e-13	1.2e-11	5.08	6.79	NA	NA	NA
NA	1624027_at	1.045	8.629	2e-13	1.2e-11	8.29	9.33	NA	NA	NA
FBgn0031248	1639338_at	-4.723	9.674	2.1e-13	1.2e-11	11.21	6.49	CG11912	CG11912	NA
FBgn0002183	1630638_at	1.321	6.56	2.1e-13	1.2e-11	6.07	7.39	dre4	CG1828	dre4
FBgn0030946	1635481_a_at	-2.024	9.231	2.2e-13	1.2e-11	10.11	8.08	CG6659	CG6659	NA
FBgn0039849	1624246_s_at	-1.109	10.141	2.2e-13	1.2e-11	10.63	9.52	CG11334	CG11334	NA
FBgn0031362	1634296_s_at	-1.812	10.615	2.2e-13	1.2e-11	11.27	9.45	CG17646	CG17646	NA
FBgn0030876	1641455_at	1.465	8.633	2.2e-13	1.2e-11	8.15	9.61	CG6762	CG6762	NA
FBgn0037820	1632648_at	2.662	5.599	2.2e-13	1.2e-11	4.4	7.06	CG14681	CG14681	NA
FBgn0032596	1626782_at	0.951	11.723	2.3e-13	1.3e-11	11.34	12.29	CG17331	CG17331	NA
FBgn0032262	1624425_at	-2.228	7.765	2.3e-13	1.3e-11	8.49	6.26	CG7384	CG7384	NA
FBgn0038582	1631435_at	1.763	7.097	2.4e-13	1.3e-11	6.5	8.26	CG7988	CG7988	NA
FBgn0259715	1631604_at	-2.683	10.515	2.4e-13	1.3e-11	11.53	8.84	CG42369	CG42369	NA
FBgn0040606	1632984_s_at	-2.274	11.687	2.4e-13	1.3e-11	12.54	10.27	CG6503	CG6503	NA
FBgn0086134	1635872_at	0.84	11.71	2.4e-13	1.3e-11	11.38	12.22	Pros25	CG5266	Proteasome 25kD subunit
FBgn0003114	1632814_at	-3.692	6.654	2.4e-13	1.3e-11	7.84	4.14	plu	CG9183	plutonium
NA	1627986_s_at	-4.243	8.989	2.4e-13	1.3e-11	10.32	6.08	NA	NA	NA
FBgn0038180	1624036_at	1.845	6.181	2.5e-13	1.3e-11	5.8	7.64	Cht5	CG9307	Cht5
FBgn0004926	1636176_at	0.957	11.655	2.5e-13	1.3e-11	11.37	12.33	eIF-2beta	CG4153	Eukaryotic initiation factor 2beta
FBgn0033477	1627152_at	1.88	10.557	2.5e-13	1.3e-11	9.99	11.87	CG12918	CG12918	NA
FBgn0032029	1628290_s_at	-1.404	10.306	2.6e-13	1.4e-11	10.92	9.51	CG17292	CG17292	NA
FBgn0000404	1639195_a_at	-3.304	10.324	2.6e-13	1.4e-11	11.35	8.05	CycA	CG5940	Cyclin A
FBgn0037230	1633206_at	-3.062	8.647	2.7e-13	1.4e-11	9.74	6.68	CG9780	CG9780	NA
FBgn0034184	1632187_at	1.624	8.239	2.7e-13	1.4e-11	7.64	9.27	CG9646	CG9646	NA
FBgn0039031	1625837_at	-2.242	10.009	2.7e-13	1.4e-11	10.82	8.58	CG17244	CG17244	NA
FBgn0015570	1633196_at	-3.311	7.942	2.7e-13	1.4e-11	8.9	5.59	alpha-Est2	CG2505	alpha-Esterase-2
NA	1626821_s_at	4.343	6.367	2.8e-13	1.4e-11	4.84	9.19	NA	NA	NA
NA	1635199_at	2.713	10.34	2.8e-13	1.4e-11	9.32	12.03	NA	NA	NA
FBgn0039151	1636170_at	-3.364	8.759	2.9e-13	1.5e-11	9.99	6.62	CG13607	CG13607	NA
FBgn0024891	1627939_a_at	1.188	9.693	3.1e-13	1.5e-11	9.32	10.51	ferrochelatase	CG2098	ferrochelatase
FBgn0030887	1624485_at	-1.802	7.499	3.2e-13	1.6e-11	8.14	6.34	CG6867	CG6867	NA
FBgn0039049	1623849_s_at	-1.312	11.285	3.3e-13	1.6e-11	11.73	10.42	CG6726	CG6726	NA
FBgn0002567	1632119_s_at	-1.387	10.016	3.3e-13	1.6e-11	10.65	9.27	ltd	CG8024	lightoid
FBgn0039342	1634240_at	-7.808	11.316	3.3e-13	1.6e-11	13.98	6.17	CG5107	CG5107	NA
FBgn0030864	1639349_at	-2.469	7.536	3.3e-13	1.6e-11	8.25	5.78	CG8173	CG8173	NA
FBgn0005630	1625768_s_at	-3.068	9.083	3.4e-13	1.6e-11	10.04	6.97	lola	CG12052	longitudinals lacking
FBgn0015575	1637255_a_at	-1.701	10.643	3.4e-13	1.6e-11	11.3	9.6	alpha-Est7	CG1112	alpha-Esterase-7
FBgn0004635	1635462_at	4.608	7.318	3.5e-13	1.6e-11	5.53	10.14	rho	CG1004	rhomboid
FBgn0028692	1638876_at	1.007	11.116	3.5e-13	1.6e-11	10.74	11.74	Rpn2	CG11888	Rpn2
FBgn0034858	1637700_s_at	1.09	8.825	3.5e-13	1.7e-11	8.5	9.59	eIF2B-delta	CG10315	eIF2B-delta
FBgn0037364	1635643_at	-2.85	7.226	3.5e-13	1.7e-11	8.15	5.3	Rab23	CG2108	Rab23
FBgn0030608	1637359_at	-1.596	11.07	3.6e-13	1.7e-11	11.63	10.03	Lsd-2	CG9057	Lipid storage droplet-2
FBgn0027560	1639415_at	-1.841	12.185	3.7e-13	1.7e-11	12.88	11.04	Tps1	CG4104	Trehalose-6-phosphate synthase 1
FBgn0038484	1640355_at	-4.497	11.249	3.7e-13	1.7e-11	12.74	8.24	CG5246	CG5246	NA
FBgn0030509	1641715_at	-3.435	7.077	3.7e-13	1.7e-11	8.45	5.02	CG11162	CG11162	NA
FBgn0032184	1625802_a_at	1.859	5.32	3.7e-13	1.7e-11	4.71	6.56	CG13135	CG13135	NA
FBgn0034793	1629039_at	1.196	9.164	3.8e-13	1.8e-11	8.8	9.99	asrij	CG13533	asrij
FBgn0039254	1627165_a_at	1.274	6.902	3.8e-13	1.8e-11	6.48	7.76	Nmnat	CG13645	Nicotinamide mononucleotide adenylyltransferase
FBgn0035996	1626220_at	2.906	7.873	4e-13	1.8e-11	6.8	9.71	CG3448	CG3448	NA
NA	1634450_a_at	2.291	6.287	4e-13	1.8e-11	5.35	7.64	NA	NA	NA
FBgn0035620	1637660_at	-4.782	10.422	4.1e-13	1.8e-11	12.27	7.49	CG5150	CG5150	NA
FBgn0085485	1627596_at	-1.717	7.548	4.1e-13	1.8e-11	8.37	6.65	CG34456	CG34456	NA
FBgn0004629	1640112_at	1.223	12.261	4.1e-13	1.8e-11	11.87	13.09	Cys	CG8050	Cystatin-like
FBgn0035186	1623126_at	-3.168	9.684	4.1e-13	1.8e-11	10.94	7.77	CG13912	CG13912	NA
FBgn0051694	1637307_at	0.869	10.317	4.1e-13	1.8e-11	9.98	10.84	CG31694	CG31694	NA
FBgn0053525	1623954_s_at	-2.9	7.055	4.1e-13	1.8e-11	7.94	5.04	CoRest	CG33525	NA
FBgn0259152	1623888_at	1.162	9.118	4.2e-13	1.8e-11	8.72	9.88	Clbn	CG11847	Caliban
FBgn0003046	1623092_at	-3.267	7.795	4.2e-13	1.8e-11	9.11	5.84	Pcp	CG3440	NA
FBgn0086350	1638779_at	-2.405	7.738	4.3e-13	1.8e-11	8.45	6.05	tef	CG8961	teflon
FBgn0033724	1638959_at	1.709	5.478	4.3e-13	1.9e-11	4.86	6.57	CG8501	CG8501	NA
FBgn0040942	1628696_at	-2.363	8.298	4.5e-13	1.9e-11	9.29	6.93	CG12643	CG12643	NA
NA	1637926_s_at	1.165	9.673	4.5e-13	1.9e-11	9.29	10.46	NA	NA	NA
FBgn0028684	1629676_at	0.88	10.813	4.6e-13	2e-11	10.5	11.38	Tbp-1	CG10370	Tat-binding protein-1
FBgn0038845	1637485_at	-1.926	10.763	4.7e-13	2e-11	11.42	9.49	CG10827	CG10827	NA
FBgn0031115	1640187_a_at	1.071	8.323	4.7e-13	2e-11	7.97	9.05	CG11710	CG11710	NA
FBgn0051304	1640335_at	-1.975	7.607	4.7e-13	2e-11	8.45	6.48	CG31304	CG31304	NA
FBgn0041707	1636249_at	1.859	8.322	4.8e-13	2e-11	7.7	9.56	7B2	CG1168	7B2
FBgn0032069	1636395_at	-5.229	8.677	4.8e-13	2e-11	10.98	5.75	CG9468	CG9468	NA
FBgn0052284	1639457_at	3.623	9.876	4.8e-13	2e-11	8.2	11.83	CG32284	CG32284	NA
NA	1627973_s_at	1.222	7.416	4.8e-13	2e-11	7.01	8.23	NA	NA	NA
FBgn0035023	1628778_at	1.555	9.195	4.9e-13	2e-11	8.61	10.17	itp	CG13586	ion transport peptide
FBgn0025866	1626967_at	1.625	10.378	4.9e-13	2e-11	9.77	11.4	CalpB	CG8107	Calpain-B
FBgn0035887	1641052_at	-3.584	7.553	4.9e-13	2e-11	9.04	5.46	Jon66Cii	CG7170	NA
FBgn0261396	1628269_at	0.884	10.506	5e-13	2e-11	10.19	11.07	Rpn3	CG42641	Regulatory particle non-ATPase 3
FBgn0039580	1635153_at	1.12	10.381	5.2e-13	2.1e-11	10.02	11.14	Gfat2	CG1345	Glutamine:fructose-6-phosphate aminotransferase 2
FBgn0020623	1632701_at	2.055	6.982	5.2e-13	2.1e-11	6.35	8.41	Pal	CG5472	NA
FBgn0026061	1626990_s_at	-3.336	10.195	5.3e-13	2.1e-11	11.68	8.34	Mipp1	CG4123	Multiple inositol polyphosphate phosphatase 1
FBgn0031538	1637422_at	-1.822	10.054	5.3e-13	2.1e-11	10.79	8.97	CG3246	CG3246	NA
FBgn0032374	1630140_at	-3.287	6.526	5.4e-13	2.2e-11	7.61	4.32	CG14931	CG14931	NA
FBgn0030006	1628706_at	1.428	7.924	5.5e-13	2.2e-11	7.35	8.77	CG17982	CG17982	NA
FBgn0035762	1636308_at	1.112	7.72	5.5e-13	2.2e-11	7.39	8.5	CG8605	CG8605	NA
FBgn0026080	1635824_at	0.903	8.268	5.6e-13	2.2e-11	7.93	8.83	Tip60	CG6121	Tip60
FBgn0030739	1623566_at	2.15	6.763	5.7e-13	2.2e-11	6.03	8.18	CG13957	CG13957	NA
FBgn0030593	1631072_at	-1.67	11.094	5.8e-13	2.3e-11	11.8	10.13	CG9512	CG9512	NA
FBgn0004595	1635500_a_at	2	7.072	5.8e-13	2.3e-11	6.43	8.43	pros	CG17228	prospero
FBgn0038842	1632558_at	1.264	7.602	6.1e-13	2.4e-11	7.21	8.47	CG5630	CG5630	NA
FBgn0030114	1637504_at	1.241	8.456	6.1e-13	2.4e-11	8.02	9.26	CG17754	CG17754	NA
FBgn0010383	1631300_at	-2.649	8.085	6.2e-13	2.4e-11	8.98	6.33	Cyp18a1	CG6816	Cytochrome P450-18a1
FBgn0037470	1630469_a_at	0.945	9.295	6.2e-13	2.4e-11	8.94	9.88	CG1091	CG1091	NA
FBgn0040398	1636804_at	-1.683	11.441	6.2e-13	2.4e-11	12.15	10.47	CG14629	CG14629	NA
FBgn0037609	1635637_at	1.268	8.966	6.2e-13	2.4e-11	8.48	9.75	CG9773	CG9773	NA
FBgn0034961	1627433_at	1.06	8.908	6.4e-13	2.4e-11	8.52	9.58	CG3163	CG3163	NA
FBgn0016123	1636888_a_at	-1.825	10.356	6.5e-13	2.4e-11	10.92	9.09	Aph-4	CG1462	Alkaline phosphatase 4
FBgn0033366	1641280_at	-4.986	7.783	6.5e-13	2.4e-11	9.68	4.7	Ance-4	CG8196	Ance-4
FBgn0035484	1632688_s_at	-1.908	8.114	6.5e-13	2.4e-11	8.78	6.87	CG11594	CG11594	NA
FBgn0035619	1636287_at	-4.868	10.837	6.6e-13	2.5e-11	12.67	7.8	CG10592	CG10592	NA
FBgn0016122	1640031_at	-2.398	10.176	6.8e-13	2.6e-11	11.03	8.63	Acer	CG10593	Angiotensin-converting enzyme-related
FBgn0035666	1641190_at	-3.979	11.307	6.9e-13	2.6e-11	12.69	8.71	Jon65Aii	CG6580	Jonah 65Aii
FBgn0037996	1623398_at	-5.77	8.173	7.1e-13	2.6e-11	10.31	4.54	CG4830	CG4830	NA
FBgn0051390	1630318_at	1.275	8.45	7.3e-13	2.7e-11	7.94	9.22	MED7	CG31390	Mediator complex subunit 7
FBgn0040531	1633208_at	-2.459	7.232	7.4e-13	2.7e-11	8.52	6.06	CG11741	CG11741	NA
FBgn0033782	1624195_at	-2.855	10.048	7.7e-13	2.8e-11	11.1	8.24	sug	CG3850	sugarbabe
FBgn0001085	1639883_at	1.702	4.706	7.8e-13	2.8e-11	4.29	5.99	fz	CG17697	frizzled
FBgn0039254	1625565_at	1.44	7.182	7.9e-13	2.9e-11	6.73	8.18	Nmnat	CG13645	Nicotinamide mononucleotide adenylyltransferase
FBgn0250815	1628800_at	-1.187	14.071	7.9e-13	2.9e-11	14.47	13.29	Jon65Aiv	CG6467	Jonah 65Aiv
FBgn0030676	1632707_at	1.719	7.472	8e-13	2.9e-11	6.93	8.65	CG12379	CG12379	NA
FBgn0047351	1629331_at	3.815	5.408	8.1e-13	2.9e-11	4.06	7.88	CG31468	CG31468	NA
FBgn0022700	1631472_at	3.291	9.079	8.4e-13	3e-11	7.61	10.9	Cht4	CG3986	NA
FBgn0030890	1630944_s_at	-1.208	10.335	8.6e-13	3.1e-11	10.98	9.77	CG7536	CG7536	NA
FBgn0051380	1626164_at	-1.452	7.316	8.6e-13	3.1e-11	7.98	6.53	CG31380	CG31380	NA
FBgn0250843	1631376_at	0.9	11.793	8.7e-13	3.1e-11	11.39	12.29	Pros35	CG4904	Proteasome 35kD subunit
FBgn0032216	1631050_at	0.877	11.195	8.8e-13	3.1e-11	10.86	11.74	CG5384	CG5384	NA
FBgn0034292	1633532_at	-1.775	10.641	8.9e-13	3.1e-11	11.4	9.63	CG5767	CG5767	NA
FBgn0038938	1630335_s_at	-2.358	9.039	8.9e-13	3.1e-11	9.92	7.56	CG7084	CG7084	NA
NA	1630842_s_at	0.892	10.185	9e-13	3.1e-11	9.85	10.74	NA	NA	NA
FBgn0036919	1628710_at	0.896	8.516	9.3e-13	3.2e-11	8.28	9.18	Grasp65	CG7809	Grasp65
FBgn0035090	1638481_at	-3.069	9.488	9.5e-13	3.3e-11	10.62	7.55	CG2736	CG2736	NA
FBgn0039251	1639251_at	-2.215	6.865	9.6e-13	3.3e-11	7.5	5.28	Trf4-2	CG17462	NA
FBgn0052068	1639857_at	-0.935	11.41	9.6e-13	3.3e-11	11.74	10.8	CG32068	CG32068	NA
FBgn0028992	1631226_at	0.786	9.759	9.8e-13	3.4e-11	9.47	10.25	sds22	CG5851	sds22
FBgn0038575	1627301_s_at	-4.389	6.829	1e-12	3.4e-11	8.28	3.89	CG7208	CG7208	NA
FBgn0034588	1636970_at	-4.076	8.593	1e-12	3.4e-11	10.21	6.13	CG9394	CG9394	NA
FBgn0031114	1634714_at	1.83	8.406	1e-12	3.4e-11	7.78	9.61	cactin	CG1676	cactin
FBgn0038302	1628896_a_at	1.199	9.502	1e-12	3.4e-11	9.18	10.38	CG4210	CG4210	NA
NA	1632712_s_at	0.88	12.244	1e-12	3.4e-11	11.94	12.82	NA	NA	NA
NA	1627055_at	2.476	6.548	1e-12	3.4e-11	5.64	8.12	NA	NA	NA
FBgn0020414	1626301_at	2.138	6.134	1.1e-12	3.6e-11	5.36	7.5	Idgf3	CG4559	Imaginal disc growth factor 3
FBgn0031930	1635065_at	-4.497	8.745	1.1e-12	3.5e-11	10.45	5.95	CG7025	CG7025	NA
FBgn0010314	1627770_at	-2.606	7.476	1.1e-12	3.5e-11	8.26	5.65	Cks30A	CG3738	Cyclin-dependent kinase subunit 30A
FBgn0040060	1638661_at	-0.915	14.146	1.1e-12	3.6e-11	14.45	13.53	yip7	CG6457	yippee interacting protein 7
FBgn0035430	1634768_at	2.512	5.634	1.1e-12	3.6e-11	4.76	7.27	CG12009	CG12009	NA
FBgn0037146	1637154_at	-1.939	11.157	1.1e-12	3.6e-11	11.89	9.95	CG7470	CG7470	NA
FBgn0014031	1637872_at	-1.611	10.151	1.1e-12	3.6e-11	10.77	9.16	Spat	CG3926	Serine pyruvate aminotransferase
FBgn0031213	1634650_at	0.898	10.526	1.1e-12	3.6e-11	10.23	11.13	galectin	CG11372	galectin
FBgn0031836	1641169_s_at	-0.715	11.18	1.1e-12	3.7e-11	11.43	10.71	CG11050	CG11050	NA
NA	1632652_s_at	1.984	9.983	1.1e-12	3.5e-11	9.39	11.38	NA	NA	NA
FBgn0010424	1631217_a_at	1.3	9.034	1.2e-12	3.7e-11	8.56	9.86	TpnC73F	CG7930	Troponin C at 73F
FBgn0030263	1640185_at	1.133	10.293	1.2e-12	3.8e-11	9.96	11.1	CG2076	CG2076	NA
FBgn0026582	1638938_at	1.123	8.105	1.2e-12	3.8e-11	7.67	8.79	CG9418	CG9418	NA
FBgn0033391	1633840_a_at	-1.318	9.62	1.2e-12	3.8e-11	10.21	8.89	CG8026	CG8026	NA
FBgn0034629	1633476_at	-1.991	10.269	1.2e-12	4e-11	11.07	9.08	Acox57D-d	CG9709	acyl-Coenzyme A oxidase at 57D distal
FBgn0033592	1633066_at	2.66	7.841	1.2e-12	3.8e-11	6.53	9.19	CG13215	CG13215	NA
FBgn0039294	1639044_at	4.717	5.571	1.2e-12	3.8e-11	3.86	8.58	Cad96Cb	CG13664	NA
FBgn0039254	1635881_at	1.166	8.143	1.3e-12	4e-11	7.77	8.94	Nmnat	CG13645	Nicotinamide mononucleotide adenylyltransferase
FBgn0036210	1629287_at	1.18	7.554	1.3e-12	4e-11	7.17	8.35	CG14130	CG14130	NA
FBgn0026374	1634557_at	1.603	8.235	1.3e-12	4e-11	7.78	9.38	Rhp	CG8497	Rhophilin
FBgn0034403	1637617_at	-2.708	7.985	1.3e-12	4e-11	8.89	6.18	CG18190	CG18190	NA
FBgn0027073	1630066_at	-1.428	9.948	1.3e-12	4e-11	10.51	9.08	CG4302	CG4302	NA
FBgn0038720	1627000_s_at	1.737	8.124	1.3e-12	4.1e-11	7.52	9.25	CG6231	CG6231	NA
FBgn0021872	1635355_a_at	0.986	11.318	1.3e-12	4.2e-11	11.02	12	Xbp1	CG9415	X box binding protein-1
FBgn0032393	1640977_at	1.016	9.866	1.3e-12	4.2e-11	9.52	10.54	CG12264	CG12264	NA
FBgn0004436	1630287_at	0.972	10.062	1.4e-12	4.4e-11	9.65	10.62	UbcD6	CG2013	Ubiquitin conjugating enzyme
FBgn0003028	1627259_a_at	-2.827	8.851	1.4e-12	4.4e-11	9.77	6.94	ovo	CG6824	ovo
FBgn0036689	1635468_a_at	-2.58	7.282	1.4e-12	4.4e-11	8.1	5.52	CG7730	CG7730	NA
FBgn0039817	1638862_at	-1.523	5.585	1.4e-12	4.4e-11	6.08	4.56	CG15553	CG15553	NA
FBgn0038820	1622974_at	1.689	8.635	1.5e-12	4.5e-11	8.03	9.72	CG4000	CG4000	NA
FBgn0010303	1626465_a_at	0.878	7.86	1.5e-12	4.5e-11	7.5	8.38	hep	CG4353	hemipterous
FBgn0015625	1626454_at	-3.349	8.359	1.5e-12	4.6e-11	9.38	6.03	CycB3	CG5814	Cyclin B3
FBgn0034849	1625490_at	1.024	8.814	1.5e-12	4.6e-11	8.47	9.5	CG3500	CG3500	NA
FBgn0027521	1630343_at	-3.069	7.688	1.5e-12	4.6e-11	8.63	5.56	CG3679	CG3679	NA
FBgn0031929	1632695_at	-1.661	11.147	1.5e-12	4.6e-11	11.73	10.07	CG18585	CG18585	NA
FBgn0038717	1630528_at	-4.09	8.604	1.5e-12	4.6e-11	10.36	6.27	CG17751	CG17751	NA
NA	1625925_at	-3.01	9.691	1.5e-12	4.4e-11	10.66	7.65	NA	NA	NA
FBgn0014029	1626425_at	1	10.28	1.6e-12	4.6e-11	9.92	10.92	2002-09-01	CG4173	Septin-2
FBgn0039205	1638216_at	1.277	9.06	1.6e-12	4.7e-11	8.7	9.98	CG13623	CG13623	NA
FBgn0037714	1641627_at	-2.754	9.253	1.6e-12	4.7e-11	10.4	7.64	CG9396	CG9396	NA
FBgn0034885	1626308_s_at	-1.194	10.232	1.6e-12	4.7e-11	10.76	9.56	CG4019	CG4019	NA
FBgn0036290	1626801_at	2.135	9.5	1.6e-12	4.7e-11	8.62	10.76	CG10638	CG10638	NA
FBgn0004650	1624058_at	-3.54	6.726	1.6e-12	4.7e-11	7.92	4.38	fs(1)N	CG11411	female sterile (1) Nasrat
FBgn0041789	1626624_s_at	1.113	8.27	1.6e-12	4.7e-11	7.79	8.9	Pax	CG31794	Paxillin
FBgn0034021	1629887_at	-2.268	8.16	1.6e-12	4.7e-11	8.91	6.64	CG8180	CG8180	NA
FBgn0032336	1634436_at	1.71	11.493	1.6e-12	4.8e-11	10.92	12.63	Ast-C	CG14919	Allatostatin C
FBgn0032820	1641066_s_at	-2.017	10.695	1.6e-12	4.8e-11	11.43	9.41	fbp	CG31692	fructose-1%2C6-bisphosphatase
FBgn0033764	1632530_s_at	-1.449	9.659	1.6e-12	4.7e-11	10.19	8.74	CG8776	CG8776	NA
FBgn0030114	1638327_a_at	1.171	6.883	1.7e-12	4.8e-11	6.47	7.64	CG17754	CG17754	NA
FBgn0033048	1623229_at	-2.083	8.821	1.7e-12	4.8e-11	9.63	7.54	CG7881	CG7881	NA
FBgn0029664	1633355_at	1.265	8.196	1.7e-12	4.8e-11	7.81	9.08	CG10802	CG10802	NA
FBgn0002525	1636809_at	0.903	8.928	1.7e-12	4.8e-11	8.56	9.47	Lam	CG6944	Lamin
FBgn0039471	1635868_at	-7.066	11.155	1.7e-12	4.9e-11	13.59	6.53	CG6295	CG6295	NA
FBgn0053542	1641119_at	2.208	4.76	1.7e-12	4.8e-11	3.9	6.1	upd3	CG33542	NA
FBgn0037340	1637379_at	0.747	9.499	1.8e-12	5e-11	9.26	10.01	CG14671	CG14671	NA
FBgn0030837	1629313_at	-1.568	12.256	1.8e-12	5e-11	12.72	11.15	CG8661	CG8661	NA
FBgn0030828	1634257_at	-1.503	8.808	1.8e-12	5e-11	9.56	8.06	CG5162	CG5162	NA
FBgn0034401	1630677_at	1.07	9.929	1.8e-12	5.1e-11	9.53	10.6	CG15100	CG15100	NA
FBgn0035282	1638184_at	-2.194	5.218	1.8e-12	5.1e-11	6.32	4.13	CG13936	CG13936	NA
FBgn0052638	1634787_at	0.843	9.762	1.8e-12	5.1e-11	9.39	10.23	CG32638	CG32638	NA
FBgn0040985	1624583_at	0.757	11.908	1.8e-12	5.1e-11	11.62	12.38	CG6115	CG6115	NA
FBgn0032219	1627658_s_at	-2.323	7.358	1.8e-12	5e-11	8.19	5.87	CG4995	CG4995	NA
FBgn0052379	1628355_at	-2.152	6.942	1.8e-12	5.1e-11	8	5.85	CG32379	CG32379	NA
NA	1640801_at	-1.249	9.77	1.8e-12	5.1e-11	10.22	8.97	NA	NA	NA
FBgn0054026	1636470_at	-2.963	10.645	1.9e-12	5.1e-11	11.59	8.63	CG34026	CG34026	NA
FBgn0034275	1634012_at	-1.138	9.513	1.9e-12	5.1e-11	9.97	8.83	CG5002	CG5002	NA
FBgn0051343	1626832_at	-1.277	12.484	1.9e-12	5.2e-11	12.95	11.67	CG31343	CG31343	NA
FBgn0030348	1638778_at	3.232	5.76	1.9e-12	5.3e-11	4.66	7.9	CG10352	CG10352	NA
FBgn0038613	1636240_at	-2.336	8.612	1.9e-12	5.3e-11	9.59	7.25	CG7678	CG7678	Vacuolar H[+] ATPase subunit 100-4
FBgn0038804	1625369_at	-1.967	8.541	2e-12	5.3e-11	9.79	7.82	CG10877	CG10877	NA
FBgn0028686	1637341_at	0.876	11.106	2e-12	5.3e-11	10.77	11.65	Rpt3	CG16916	Rpt3
FBgn0013765	1635619_a_at	1.28	8.147	2e-12	5.4e-11	7.54	8.82	cnn	CG4832	centrosomin
FBgn0039527	1630064_at	1.307	7.173	2e-12	5.4e-11	6.7	8	CG5639	CG5639	NA
FBgn0038107	1626679_at	1.195	8.908	2.1e-12	5.6e-11	8.51	9.7	CG17327	CG17327	NA
FBgn0010039	1635701_at	1.708	8.321	2.1e-12	5.6e-11	7.72	9.43	GstD3	CG4381	Glutathione S transferase D3
FBgn0010357	1630320_at	-2.39	13.529	2.1e-12	5.6e-11	14.32	11.93	betaTry	CG18211	betaTrypsin
FBgn0004045	1629545_at	-0.848	14.207	2.1e-12	5.7e-11	14.51	13.66	Yp1	CG2985	Yolk protein 1
FBgn0021765	1634433_at	-0.922	11.986	2.2e-12	5.8e-11	12.33	11.41	scu	CG7113	scully
FBgn0041627	1625759_at	1.91	7.557	2.2e-12	5.8e-11	6.94	8.85	Ku80	CG18801	Ku80
FBgn0040532	1623342_at	1.638	10.71	2.2e-12	5.8e-11	10.1	11.74	CG8369	CG8369	NA
FBgn0001218	1635423_s_at	1.392	12.562	2.2e-12	5.9e-11	12.15	13.54	Hsc70-3	CG4147	Heat shock protein cognate 3
FBgn0086699	1628830_at	1.34	6.681	2.2e-12	5.9e-11	6.36	7.7	l(3)S147910	CG14121	NA
FBgn0023214	1630707_at	1.842	8.368	2.3e-12	6e-11	7.67	9.52	edl	CG15085	ETS-domain lacking
FBgn0033301	1623018_at	1.771	11.607	2.3e-12	6e-11	10.73	12.5	CG12780	CG12780	NA
FBgn0027095	1639410_at	1.551	11.168	2.3e-12	6e-11	10.69	12.24	Manf	CG7013	Mesencephalic astrocyte-derived neurotrophic factor
FBgn0011823	1637276_at	-2.825	9.52	2.3e-12	6.1e-11	10.39	7.56	Pen	CG4799	Pendulin
FBgn0033096	1635384_at	-2.486	6.974	2.3e-12	6e-11	8.42	5.94	ZIP1	CG9428	NA
FBgn0051233	1632461_at	-2.088	11.464	2.4e-12	6.3e-11	12.1	10.01	CG31233	CG31233	NA
FBgn0031633	1635482_at	1.244	9.413	2.4e-12	6.3e-11	8.95	10.2	CG2976	CG2976	NA
FBgn0032799	1638217_at	0.827	10.117	2.4e-12	6.3e-11	9.85	10.68	CG10166	CG10166	NA
NA	AFFX-r2-Dros-GAPDH-M_a_at	-1.649	10.966	2.4e-12	6.3e-11	11.57	9.93	NA	NA	NA
FBgn0033377	1628550_a_at	1.301	8.797	2.5e-12	6.5e-11	8.25	9.55	Pmm45A	CG8073	Phosphomannomutase 45A
FBgn0012037	1632431_s_at	-1.059	11.535	2.5e-12	6.5e-11	11.91	10.86	Ance	CG8827	Angiotensin converting enzyme
FBgn0032809	1630822_at	-3.036	7.654	2.5e-12	6.5e-11	9.45	6.41	CG13078	CG13078	NA
FBgn0032194	1624141_at	1.294	8.833	2.6e-12	6.5e-11	8.38	9.68	CG4901	CG4901	NA
FBgn0010905	1633021_s_at	-1.339	8.686	2.6e-12	6.5e-11	9.21	7.87	Spn	CG16757	Spinophilin
FBgn0036576	1639803_at	-1.397	9.189	2.6e-12	6.5e-11	9.76	8.36	CG5151	CG5151	NA
FBgn0023095	1638580_at	0.967	8.456	2.6e-12	6.5e-11	8.07	9.03	caps	CG11282	capricious
FBgn0035663	1629860_at	-1.948	5.629	2.6e-12	6.5e-11	6.36	4.41	CG6462	CG6462	NA
NA	1631785_at	-3.366	6.636	2.6e-12	6.6e-11	7.66	4.29	NA	NA	NA
FBgn0015282	1630788_at	1.021	10.666	2.7e-12	6.7e-11	10.28	11.3	Pros26.4	CG5289	Proteasome 26S subunit subunit 4 ATPase
FBgn0035346	1637605_s_at	1.425	9.319	2.7e-12	6.7e-11	8.8	10.22	CG1146	CG1146	NA
FBgn0011556	1635815_at	-2.658	10.32	2.8e-12	6.9e-11	11.44	8.79	zetaTry	CG12387	zetaTrypsin
FBgn0034046	1635089_at	-1.509	7.5	2.8e-12	6.9e-11	8.13	6.62	tun	CG8253	tungus
FBgn0033216	1625129_at	-3.999	7.731	2.8e-12	7e-11	9.17	5.17	CG1946	CG1946	NA
FBgn0000351	1632624_at	-2.508	6.683	2.8e-12	7e-11	7.55	5.04	cort	CG11330	cortex
FBgn0053208	1636412_at	-3.315	6.048	2.8e-12	7e-11	7.11	3.79	Mical	CG33208	Molecule interacting with CasL
FBgn0035343	1640881_at	4.348	10.617	2.8e-12	6.9e-11	9.13	13.48	CG16762	CG16762	NA
NA	1637987_at	1.126	10.223	2.8e-12	6.9e-11	9.8	10.92	NA	NA	NA
FBgn0027079	1638259_s_at	1.056	9.223	2.9e-12	7e-11	8.89	9.95	Aats-val	CG4062	Valyl-tRNA synthetase
FBgn0040236	1639771_at	1.779	9.516	2.9e-12	7.2e-11	8.89	10.67	c11.1	CG12132	c11.1
FBgn0026189	1641333_s_at	1.507	7.964	2.9e-12	7.2e-11	7.36	8.87	prominin-like	CG7740	prominin-like
FBgn0037279	1638295_s_at	1.356	10.708	2.9e-12	7.2e-11	10.19	11.55	CG1129	CG1129	NA
FBgn0036847	1637571_at	1.11	9.424	3e-12	7.2e-11	9.01	10.12	CG11577	CG11577	NA
FBgn0250820	1625250_at	0.981	10.507	3e-12	7.3e-11	10.21	11.19	CG5802	CG5802	NA
NA	1633491_s_at	0.784	8.205	3e-12	7.3e-11	7.93	8.71	NA	NA	NA
FBgn0035734	1641741_a_at	-1.828	6.338	3.1e-12	7.4e-11	7.14	5.31	CG14823	CG14823	NA
FBgn0031091	1639608_at	-2.496	8.277	3.1e-12	7.4e-11	9.09	6.59	CG9576	CG9576	NA
FBgn0031294	1637378_s_at	1.534	10.239	3.1e-12	7.4e-11	9.77	11.31	ia2	CG31795	IA-2 ortholog
FBgn0026439	1641104_s_at	-1.404	9.65	3.1e-12	7.5e-11	10.2	8.8	Eaat1	CG3747	Excitatory amino acid transporter 1
NA	1627525_a_at	1.39	9.597	3.1e-12	7.4e-11	9.11	10.5	NA	NA	NA
FBgn0028685	1640710_at	0.966	10.864	3.2e-12	7.6e-11	10.49	11.45	Rpt4	CG3455	Rpt4
FBgn0038950	1637564_a_at	1.042	8.893	3.2e-12	7.6e-11	8.56	9.6	CG5382	CG5382	NA
FBgn0040232	1624191_at	-1.697	6.548	3.3e-12	7.7e-11	7.06	5.37	cmet	CG6392	CENP-meta
FBgn0038818	1628288_s_at	2.565	6.3	3.3e-12	7.7e-11	5.4	7.96	Nep4	CG4058	Neprilysin 4
FBgn0011769	1627945_at	1.07	8.744	3.3e-12	7.7e-11	8.41	9.48	Fdxh	CG4205	Ferredoxin
FBgn0001208	1638325_at	-1.23	10.563	3.3e-12	7.7e-11	11.03	9.8	Hn	CG7399	Henna
FBgn0036684	1634563_at	-1.091	9.105	3.4e-12	7.9e-11	9.52	8.43	CG3764	CG3764	NA
FBgn0032734	1623841_at	2.432	7.293	3.4e-12	7.9e-11	6.55	8.98	CG15169	CG15169	NA
NA	1629675_at	-2.336	4.813	3.4e-12	8e-11	5.72	3.39	NA	NA	NA
FBgn0038660	1639834_at	2.005	5.468	3.5e-12	8.1e-11	4.76	6.77	CG14291	CG14291	NA
FBgn0028690	1639091_at	0.76	11.552	3.5e-12	8.1e-11	11.27	12.03	Rpn5	CG1100	Rpn5
NA	1631367_at	0.954	7.686	3.5e-12	8.2e-11	7.34	8.29	NA	NA	NA
FBgn0040623	1632479_at	0.942	10.705	3.6e-12	8.3e-11	10.38	11.32	Spase12	CG11500	Spase 12-subunit
FBgn0038325	1627764_at	0.979	9.044	3.6e-12	8.3e-11	8.67	9.65	CG6194	CG6194	NA
FBgn0033095	1623039_at	-1.161	9.866	3.6e-12	8.3e-11	10.31	9.15	CG3409	CG3409	NA
FBgn0030041	1635987_at	-1.687	11.897	3.6e-12	8.3e-11	12.54	10.85	CG12116	CG12116	NA
NA	1626177_s_at	1.112	10.347	3.7e-12	8.5e-11	9.98	11.09	NA	NA	NA
FBgn0033886	1629266_s_at	0.728	10.992	3.8e-12	8.6e-11	10.74	11.47	CG13349	CG13349	NA
FBgn0032900	1632212_at	1.182	8.47	3.8e-12	8.6e-11	8.15	9.33	CG14401	CG14401	NA
FBgn0038957	1624405_a_at	-1.971	7.177	3.9e-12	8.9e-11	7.92	5.95	CG7059	CG7059	NA
FBgn0039154	1634158_at	-1.991	10.712	3.9e-12	8.9e-11	11.52	9.53	Npc2f	CG6164	Niemann-Pick type C-2f
FBgn0037684	1637971_a_at	-3.885	9.387	3.9e-12	8.9e-11	10.69	6.8	CG8129	CG8129	NA
FBgn0024150	1628412_at	2.361	7.686	4.1e-12	9.3e-11	6.82	9.19	Ac78C	CG10564	Adenylyl cyclase 78C
FBgn0011570	1630572_at	1.357	10.244	4.1e-12	9.3e-11	9.7	11.06	cpb	CG17158	capping protein beta
FBgn0025682	1636762_a_at	2.261	9.376	4.1e-12	9.3e-11	8.72	10.98	scf	CG9148	supercoiling factor
FBgn0036122	1631994_a_at	2.478	8.221	4.1e-12	9.3e-11	7.22	9.7	Mocs1	CG33048	NA
FBgn0038652	1630635_s_at	-2.36	10.298	4.2e-12	9.5e-11	11.24	8.88	CG7720	CG7720	NA
FBgn0005638	1641677_at	2.561	5.351	4.3e-12	9.5e-11	4.48	7.04	slbo	CG4354	slow border cells
FBgn0085275	1638637_at	1.122	7.441	4.3e-12	9.5e-11	7.04	8.16	CG34246	CG34246	NA
FBgn0034329	1633053_at	2.659	11.018	4.3e-12	9.7e-11	10.01	12.67	IM1	CG18108	Immune induced molecule 1
FBgn0002778	1628947_s_at	-1.059	9.032	4.4e-12	9.7e-11	9.48	8.42	mnd	CG3297	minidiscs
FBgn0031998	1625857_at	-1.955	10.137	4.4e-12	9.7e-11	10.91	8.96	CG8451	CG8451	NA
FBgn0010501	1637487_at	-1.029	7.501	4.4e-12	9.7e-11	7.83	6.8	Dcp-1	CG5370	Death caspase-1
FBgn0032455	1625680_a_at	-1.092	9.683	4.4e-12	9.7e-11	10.17	9.07	CG5792	CG5792	NA
FBgn0038099	1638935_at	-2.086	7.363	4.4e-12	9.7e-11	8.07	5.98	CG7091	CG7091	NA
FBgn0033543	1641714_at	-1.962	9.771	4.5e-12	9.8e-11	10.56	8.6	CG12338	CG12338	NA
FBgn0000140	1627383_at	-2.502	7.746	4.5e-12	9.8e-11	8.51	6.01	asp	CG6875	abnormal spindle
FBgn0030503	1634925_at	-1.057	8.914	4.5e-12	9.8e-11	9.39	8.33	Tango2	CG11176	Transport and Golgi organization 2
FBgn0030878	1632374_at	0.954	9.227	4.5e-12	9.8e-11	8.89	9.84	CG6769	CG6769	NA
FBgn0036053	1636791_s_at	1.119	10.085	4.5e-12	9.8e-11	9.68	10.8	iPLA2-VIA	CG6718	calcium-independent phospholipase A2 VIA
FBgn0032726	1626086_at	-2.255	9.101	4.5e-12	9.8e-11	9.88	7.62	CG10621	CG10621	NA
FBgn0027580	1639255_s_at	-0.947	12.206	4.5e-12	9.8e-11	12.56	11.62	CG1516	CG1516	NA
FBgn0000083	1626707_a_at	1.415	11.541	4.6e-12	1e-10	10.99	12.41	AnnIX	CG5730	Annexin IX
FBgn0036300	1636257_at	1.234	10.208	4.7e-12	1e-10	9.84	11.07	CG10688	CG10688	NA
NA	1629160_s_at	0.848	9.095	4.7e-12	1e-10	8.85	9.69	NA	NA	NA
FBgn0028552	1632605_at	1.711	9.363	4.8e-12	1e-10	8.74	10.46	gammaSnap	CG3988	gamma-soluble NSF attachment protein
FBgn0051314	1627649_at	1.222	3.816	4.9e-12	1.1e-10	3.38	4.6	Neu3	CG7649	Neu3
FBgn0020906	1627869_at	-4.553	11.345	5.1e-12	1.1e-10	12.88	8.33	Jon25Bi	CG8867	Jonah 25Bi
FBgn0031571	1634283_at	1.475	7.82	5.1e-12	1.1e-10	7.22	8.69	CG3921	CG3921	NA
FBgn0031143	1623959_at	-1.027	10.788	5.2e-12	1.1e-10	11.17	10.14	CG1532	CG1532	NA
FBgn0000158	1634336_at	-2.517	6.224	5.2e-12	1.1e-10	6.95	4.43	bam	CG10422	bag of marbles
FBgn0034417	1624466_a_at	1.818	8.79	5.2e-12	1.1e-10	8.06	9.88	CG15117	CG15117	NA
FBgn0035091	1640501_at	-1.272	8.885	5.2e-12	1.1e-10	9.41	8.13	CG3829	CG3829	NA
FBgn0035983	1626113_at	1.164	9.307	5.3e-12	1.1e-10	8.82	9.98	CG4080	CG4080	NA
FBgn0034948	1638701_at	0.846	10.397	5.3e-12	1.1e-10	10.09	10.94	CG3825	CG3825	NA
FBgn0032036	1631237_s_at	0.948	9.194	5.4e-12	1.1e-10	8.79	9.73	CG13384	CG13384	NA
FBgn0030425	1640399_at	-2.677	9	5.4e-12	1.1e-10	10.06	7.39	CG3775	CG3775	NA
FBgn0040070	1629426_s_at	0.866	12.231	5.4e-12	1.1e-10	11.94	12.8	Trx-2	CG31884	thioredoxin-2
FBgn0028691	1626488_s_at	0.732	10.915	5.5e-12	1.2e-10	10.61	11.35	Rpn9	CG10230	Rpn9
FBgn0023175	1634795_a_at	0.752	11.294	5.6e-12	1.2e-10	10.99	11.74	Prosalpha7	CG1519	Proteasome alpha7 subunit
FBgn0035431	1634145_s_at	1.321	10.48	5.7e-12	1.2e-10	10.09	11.41	CG14968	CG14968	NA
FBgn0031381	1625334_at	1.465	11.328	5.7e-12	1.2e-10	10.73	12.2	Npc2a	CG7291	Niemann-Pick type C-2a
FBgn0039006	1630802_at	1.818	9.171	5.7e-12	1.2e-10	8.64	10.46	Cyp6d4	CG12800	Cyp6d4
FBgn0037646	1633770_at	-1.698	8.937	5.7e-12	1.2e-10	9.54	7.84	CG11967	CG11967	Carbonic anhydrase beta
FBgn0085402	1635126_a_at	0.919	9.198	5.8e-12	1.2e-10	8.81	9.73	Ect4	CG34373	NA
NA	AFFX-r2-Dros-GAPDH-3_a_at	-1.155	12.285	5.8e-12	1.2e-10	12.7	11.54	NA	NA	NA
FBgn0031813	1637461_at	-1.229	11.081	5.9e-12	1.2e-10	11.54	10.31	CG9527	CG9527	NA
FBgn0052043	1633611_s_at	-1.489	7.23	5.9e-12	1.2e-10	7.65	6.16	CG32043	CG32043	NA
FBgn0016684	1623035_at	-1.707	6.977	5.9e-12	1.2e-10	7.59	5.88	NaPi-T	CG10207	Na[+]-dependent inorganic phosphate cotransporter
FBgn0053468	1635486_at	3.645	7.764	5.9e-12	1.2e-10	6.14	9.78	CG33468	CG33468	NA
FBgn0035871	1633498_at	2.869	5.942	6e-12	1.2e-10	4.88	7.75	CG7188	CG7188	NA
FBgn0052667	1634697_at	-1.955	11.585	6.1e-12	1.2e-10	12.39	10.44	CG32667	CG32667	NA
FBgn0028955	1634036_at	-1.557	11.124	6.1e-12	1.2e-10	11.72	10.16	CG8788	CG8788	NA
FBgn0014462	1635738_at	1.474	5.969	6.3e-12	1.3e-10	5.51	6.99	Cng	CG7779	NA
FBgn0035969	1628655_at	-4.098	6.677	6.4e-12	1.3e-10	8.01	3.92	CG4476	CG4476	NA
FBgn0039741	1631054_s_at	-0.998	9.379	6.5e-12	1.3e-10	9.73	8.74	CG7943	CG7943	NA
FBgn0025724	1635871_at	0.95	9.921	6.6e-12	1.3e-10	9.64	10.59	beta'Cop	CG6699	beta'-coatomer protein
FBgn0004795	1625481_a_at	-1.7	9.198	6.7e-12	1.4e-10	9.72	8.02	retn	CG5403	retained
NA	1636305_a_at	1.12	9.277	6.8e-12	1.4e-10	8.89	10.01	NA	NA	NA
NA	1631125_at	-3.618	8.895	6.9e-12	1.4e-10	10.03	6.41	NA	NA	NA
NA	1640154_at	1.371	7.274	6.9e-12	1.4e-10	6.73	8.1	NA	NA	NA
FBgn0050290	1625725_at	0.683	10.055	7.2e-12	1.4e-10	9.84	10.52	Ppcdc	CG30290	Phosphopantothenoylcysteine decarboxylase
FBgn0042119	1631017_at	-1.365	9.711	7.2e-12	1.4e-10	10.15	8.79	Cpr65Au	CG18778	Cuticular protein 65Au
FBgn0036321	1628823_at	-2.139	10.055	7.3e-12	1.4e-10	10.98	8.84	CG14120	CG14120	NA
FBgn0003701	1634727_a_at	-2.133	6.455	7.3e-12	1.4e-10	7.08	4.95	thr	CG5785	three rows
FBgn0035955	1629948_at	-3.075	7.193	7.3e-12	1.4e-10	8.15	5.08	CG5194	CG5194	NA
FBgn0033635	1630030_at	-3.175	6.777	7.3e-12	1.4e-10	7.83	4.66	CG7777	CG7777	NA
FBgn0028480	1623704_at	-1.399	11.724	7.5e-12	1.5e-10	12.25	10.85	CG17841	CG17841	NA
FBgn0037719	1639882_at	1.134	8.813	7.5e-12	1.5e-10	8.36	9.49	bocksbeutel	CG9424	bocksbeutel
FBgn0024891	1626653_a_at	1.029	9.044	7.6e-12	1.5e-10	8.73	9.76	ferrochelatase	CG2098	ferrochelatase
FBgn0028540	1632019_s_at	-1.055	9.518	7.6e-12	1.5e-10	9.81	8.75	CG9008	CG9008	NA
FBgn0024996	1630395_at	0.817	8.71	7.7e-12	1.5e-10	8.44	9.26	eIF2B-beta	CG2677	eIF2B-beta
FBgn0033853	1640429_a_at	-1.006	11.701	7.7e-12	1.5e-10	12.03	11.03	CG6145	CG6145	NA
FBgn0031224	1628565_at	0.934	9.37	7.7e-12	1.5e-10	9.01	9.95	CG11454	CG11454	NA
FBgn0034063	1637774_s_at	-1.024	8.115	7.7e-12	1.5e-10	8.57	7.55	CG8389	CG8389	NA
FBgn0034399	1636505_at	1.23	11.168	7.8e-12	1.5e-10	10.65	11.88	CG15083	CG15083	NA
NA	1634187_x_at	2.869	8.471	7.9e-12	1.5e-10	7.3	10.17	NA	NA	NA
FBgn0010812	1640009_at	1.081	7.712	8e-12	1.5e-10	7.29	8.37	Tom34	CG2708	NA
FBgn0031645	1632317_at	-1.785	10.861	8e-12	1.5e-10	11.57	9.78	CG3036	CG3036	NA
FBgn0087040	1630239_at	-4.647	8.457	8.1e-12	1.6e-10	9.98	5.33	alphaTub67C	CG8308	alpha-Tubulin at 67C
FBgn0039212	1626506_at	0.99	8.427	8.2e-12	1.6e-10	8.12	9.11	Syx18	CG13626	Syntaxin 18
NA	1628589_at	0.717	12.398	8.2e-12	1.6e-10	12.16	12.88	NA	NA	NA
NA	1639692_s_at	0.744	9.505	8.5e-12	1.6e-10	9.22	9.96	NA	NA	NA
FBgn0038252	1639853_at	-4.416	7.938	8.6e-12	1.6e-10	9.33	4.92	CG3509	CG3509	NA
FBgn0029766	1640884_at	2.075	11.365	8.6e-12	1.6e-10	10.62	12.7	CG15784	CG15784	NA
FBgn0026417	1627856_at	0.833	7.34	8.7e-12	1.7e-10	6.99	7.83	Hus1-like	CG2525	Hus1-like
FBgn0033928	1632639_at	2.685	7.992	8.8e-12	1.7e-10	7.01	9.69	Arc2	CG13941	Arc2
FBgn0036545	1625027_a_at	1.301	8.729	8.9e-12	1.7e-10	8.3	9.6	GXIVsPLA2	CG17035	GXIVsPLA2
FBgn0086443	1624475_at	0.924	9.718	9e-12	1.7e-10	9.39	10.31	Aats-asn	CG10687	Asparaginyl-tRNA synthetase
FBgn0030114	1628712_at	1.526	8.43	9.1e-12	1.7e-10	7.88	9.4	CG17754	CG17754	NA
FBgn0035589	1635521_at	0.983	8.731	9.1e-12	1.7e-10	8.36	9.34	CG4618	CG4618	Charged multivesicular body protein 2b
FBgn0039402	1623625_at	1.443	10.145	9.1e-12	1.7e-10	9.56	11	CG14542	CG14542	vps2
FBgn0019686	1625038_s_at	-2.921	8.962	9.1e-12	1.7e-10	9.89	6.97	lok	CG10895	loki
FBgn0032140	1634978_at	3.609	9.257	9.1e-12	1.7e-10	7.86	11.47	CG13117	CG13117	NA
FBgn0000166	1631463_a_at	-4.037	7.642	9.1e-12	1.7e-10	8.9	4.87	bcd	CG1034	bicoid
FBgn0015037	1638053_at	1.716	11.849	9.2e-12	1.7e-10	11.18	12.9	Cyp4p1	CG10842	Cytochrome P450-4p1
FBgn0038700	1639762_at	-1.198	10.863	9.2e-12	1.7e-10	11.38	10.19	CG3734	CG3734	NA
FBgn0000721	1629886_s_at	-1.226	11.785	9.3e-12	1.7e-10	12.25	11.03	for	CG10033	foraging
FBgn0014000	1635989_at	-1.706	10.613	9.4e-12	1.7e-10	11.28	9.58	Hf	CG10658	Helical Factor
FBgn0037890	1624488_a_at	-0.825	11.867	9.5e-12	1.8e-10	12.21	11.38	CG17734	CG17734	NA
FBgn0034098	1636625_at	-3.37	6.789	9.5e-12	1.8e-10	7.89	4.52	krimp	CG15707	krimper
FBgn0033101	1633870_at	-0.75	10.32	9.5e-12	1.8e-10	10.71	9.96	CG9436	CG9436	NA
FBgn0035871	1622979_a_at	1.217	12.025	1e-11	1.8e-10	11.62	12.83	CG7188	CG7188	NA
FBgn0024985	1624881_at	1.437	8.254	1e-11	1.8e-10	7.68	9.11	CG11448	CG11448	NA
FBgn0000405	1639876_a_at	-3.292	10.855	1e-11	1.8e-10	11.89	8.59	CycB	CG3510	Cyclin B
FBgn0033065	1634143_at	-2.991	9.942	1e-11	1.9e-10	10.84	7.85	Cyp6w1	CG8345	Cyp6w1
FBgn0082585	1624510_at	1.301	5.997	1e-11	1.9e-10	5.61	6.91	sprt	CG30023	sprite
FBgn0036191	1638811_at	-1.962	8.105	1e-11	1.9e-10	8.9	6.94	Sug	CG7334	Sug
FBgn0010383	1641022_a_at	-2.23	7.371	1.1e-11	2e-10	8.12	5.89	Cyp18a1	CG6816	Cytochrome P450-18a1
FBgn0034328	1629530_at	3.978	9.088	1.1e-11	1.9e-10	7.6	11.58	IM23	CG15066	Immune induced molecule 23
FBgn0031464	1636572_at	-2.061	6.683	1.1e-11	1.9e-10	7.38	5.32	Duox	CG3131	Dual oxidase
FBgn0035830	1625389_at	0.941	8.975	1.1e-11	1.9e-10	8.67	9.61	CG8209	CG8209	NA
FBgn0038966	1622896_at	-1	8.299	1.1e-11	1.9e-10	8.72	7.72	pinta	CG13848	prolonged depolarization afterpotential (PDA) is not apparent
FBgn0039760	1633631_at	-2.012	9.573	1.1e-11	1.9e-10	10.4	8.39	CG9682	CG9682	NA
FBgn0035402	1630178_at	0.854	8.646	1.1e-11	2e-10	8.34	9.19	CG12082	CG12082	NA
FBgn0053469	1631521_at	2.821	7.667	1.1e-11	2e-10	6.51	9.33	CG33469	CG33469	NA
FBgn0040336	1628623_at	-1.082	9.805	1.1e-11	2e-10	10.3	9.22	CG9904	CG9904	Seipin
FBgn0003965	1623355_at	-1.252	8.359	1.1e-11	2e-10	8.93	7.68	v	CG2155	vermilion
FBgn0027611	1635125_a_at	-1.993	10.998	1.1e-11	2e-10	11.79	9.79	CG6206	CG6206	NA
FBgn0035918	1631019_at	-1.706	7.338	1.1e-11	2e-10	7.81	6.11	Cdc6	CG5971	Cdc6
FBgn0003358	1624092_at	-4.901	8.724	1.1e-11	2e-10	10.24	5.34	Jon99Ci	CG31039	Jonah 99Ci
NA	1624437_s_at	-3.334	12.284	1.1e-11	2e-10	13.34	10	NA	NA	NA
NA	1628731_s_at	-3.191	7.264	1.1e-11	1.9e-10	8.32	5.13	NA	NA	NA
FBgn0041588	1630208_at	0.751	8.126	1.2e-11	2.1e-10	7.9	8.65	ligatin	CG31426	ligatin
FBgn0086446	1626156_at	0.833	8.894	1.2e-11	2.1e-10	8.58	9.41	l(2)37Ce	CG17347	lethal (2) 37Ce
FBgn0003863	1638196_at	-0.779	14.018	1.2e-11	2.1e-10	14.28	13.5	alphaTry	CG18444	alphaTrypsin
FBgn0038984	1636967_a_at	-1.491	11.936	1.2e-11	2.1e-10	12.5	11.01	CG5315	CG5315	NA
FBgn0039972	1623825_s_at	-4.922	8.586	1.2e-11	2.1e-10	10.17	5.25	CG17018	CG17018	NA
FBgn0035347	1627478_at	1.103	10.802	1.2e-11	2.1e-10	10.4	11.5	CG33232	CG33232	NA
FBgn0013726	1627280_s_at	1.567	10.366	1.2e-11	2.1e-10	9.69	11.25	pnut	CG8705	peanut
FBgn0032639	1623871_at	2.771	4.739	1.2e-11	2.1e-10	3.76	6.53	CG18563	CG18563	NA
FBgn0052369	1635093_a_at	1.654	7.384	1.2e-11	2.1e-10	6.77	8.42	CG32369	CG32369	NA
FBgn0041160	1635336_at	1.904	8.016	1.2e-11	2.1e-10	7.33	9.23	comm2	CG7554	comm2
FBgn0024320	1640496_at	1.383	9.749	1.2e-11	2.1e-10	9.22	10.6	Npc1a	CG5722	Niemann-Pick type C-1a
FBgn0050359	1629903_at	-1.327	8.117	1.2e-11	2.1e-10	8.59	7.26	CG30359	CG30359	Maltase A5
FBgn0002787	1635259_at	0.748	10.864	1.2e-11	2.1e-10	10.59	11.34	Mov34	CG3416	Mov34
FBgn0033431	1637955_a_at	0.829	8.813	1.2e-11	2.1e-10	8.55	9.38	CG1827	CG1827	NA
FBgn0034564	1628560_at	0.888	9.033	1.2e-11	2.1e-10	8.7	9.58	CG9344	CG9344	NA
FBgn0028388	1629012_at	1.085	11.461	1.2e-11	2.1e-10	11.01	12.1	capt	CG33979	NA
NA	1638377_x_at	-3.183	12.451	1.2e-11	2.1e-10	13.46	10.28	NA	NA	NA
FBgn0051678	1640130_at	1.151	9.439	1.3e-11	2.2e-10	9.05	10.2	CG31678	CG31678	NA
FBgn0025678	1626196_at	1.695	10.646	1.3e-11	2.2e-10	10.13	11.83	CaBP1	CG5809	CaBP1
FBgn0033550	1623499_at	0.644	7.622	1.3e-11	2.2e-10	7.37	8.02	CG12341	CG12341	NA
FBgn0031497	1638642_at	0.815	10.156	1.3e-11	2.2e-10	9.91	10.73	CG17259	CG17259	NA
FBgn0024973	1626169_at	0.929	8.435	1.3e-11	2.2e-10	8.12	9.05	CG2701	CG2701	NA
FBgn0035641	1623330_at	-3.127	6.143	1.3e-11	2.2e-10	7.2	4.07	CG5568	CG5568	NA
FBgn0010241	1638775_at	-3.403	8.913	1.3e-11	2.2e-10	10.52	7.12	Mdr50	CG8523	Multi drug resistance 50
FBgn0038088	1627073_a_at	1.784	10.611	1.3e-11	2.3e-10	9.96	11.75	CG10126	CG10126	NA
FBgn0017577	1626647_at	-2.081	7.959	1.3e-11	2.3e-10	8.67	6.59	Mcm5	CG4082	Minichromosome maintenance 5
FBgn0032669	1623491_at	-1.843	10.591	1.3e-11	2.3e-10	11.5	9.66	CG15155	CG15155	NA
FBgn0031306	1640944_at	2.783	7.273	1.4e-11	2.3e-10	6.3	9.09	CG4577	CG4577	NA
FBgn0023515	1630316_a_at	-3.28	7.342	1.4e-11	2.3e-10	8.39	5.11	CG14814	CG14814	NA
FBgn0040208	1626706_at	1.771	9.481	1.4e-11	2.3e-10	8.79	10.56	katanin-60	CG10229	katanin 60
FBgn0053116	1640146_at	1.325	9.985	1.4e-11	2.3e-10	9.4	10.73	CG33116	CG33116	NA
FBgn0005695	1628210_at	-1.411	9.528	1.4e-11	2.3e-10	9.95	8.54	gcl	CG8411	germ cell-less
FBgn0024992	1626460_at	0.822	8.876	1.4e-11	2.3e-10	8.62	9.44	CG2658	CG2658	NA
FBgn0039800	1627595_at	-1.233	10.922	1.4e-11	2.3e-10	11.4	10.17	Npc2g	CG11314	Niemann-Pick type C-2g
FBgn0040347	1632240_at	-1.902	7.367	1.4e-11	2.4e-10	7.95	6.05	mus81	CG3026	mus81
FBgn0010316	1625199_s_at	-1.668	8.807	1.4e-11	2.4e-10	9.35	7.68	dap	CG1772	dacapo
FBgn0031741	1636409_at	-1.439	9.439	1.4e-11	2.4e-10	9.95	8.51	CG11034	CG11034	NA
FBgn0005612	1638050_s_at	1.706	8.668	1.4e-11	2.4e-10	8.01	9.72	Sox14	CG3090	Sox box protein 14
FBgn0036956	1637644_at	-2.009	4.905	1.4e-11	2.4e-10	5.92	3.91	CG13813	CG13813	NA
FBgn0063494	1625744_at	1.28	11.035	1.5e-11	2.4e-10	10.64	11.92	GstE6	CG17530	Glutathione S transferase E6
FBgn0037788	1627647_at	-2.671	8.885	1.5e-11	2.4e-10	9.84	7.16	CG3940	CG3940	NA
FBgn0037490	1628507_at	1.035	6.459	1.5e-11	2.4e-10	6.12	7.15	CG10053	CG10053	NA
FBgn0034346	1632403_at	1.154	7.734	1.5e-11	2.4e-10	7.26	8.41	CG12263	CG12263	NA
FBgn0010014	1641460_at	2.072	4.976	1.5e-11	2.4e-10	4.23	6.3	CanB	CG4209	Calcineurin B
FBgn0061469	1632309_at	0.806	8.919	1.5e-11	2.5e-10	8.61	9.42	As	CG6190	Ubiquitin protein ligase E3A
FBgn0034527	1631690_a_at	0.994	8.276	1.5e-11	2.5e-10	7.9	8.89	CG9945	CG9945	NA
FBgn0032149	1625836_at	0.875	8.25	1.5e-11	2.5e-10	7.96	8.84	CG4036	CG4036	NA
FBgn0085451	1641329_at	0.702	8.38	1.5e-11	2.5e-10	8.13	8.83	CG34422	CG34422	NA
NA	1625007_a_at	1.869	5.13	1.5e-11	2.4e-10	4.53	6.4	NA	NA	NA
FBgn0035006	1631496_at	-3.448	7.864	1.5e-11	2.4e-10	9.05	5.61	CG4563	CG4563	NA
NA	1627314_s_at	1.254	8.464	1.5e-11	2.5e-10	8.04	9.29	NA	NA	NA
FBgn0040475	1630606_at	1.672	9.84	1.6e-11	2.5e-10	9.2	10.87	SH3PX1	CG6757	SH3PX1
FBgn0030242	1632732_at	-2.05	6.85	1.6e-11	2.5e-10	7.51	5.46	sofe	CG1655	sister of feo
FBgn0035995	1640582_at	0.97	10.345	1.6e-11	2.5e-10	9.91	10.88	CG3529	CG3529	NA
FBgn0004873	1634736_at	-2.909	7.064	1.6e-11	2.5e-10	8	5.09	hts	CG9325	hu li tai shao
FBgn0037893	1639895_at	0.643	10.526	1.6e-11	2.5e-10	10.28	10.93	CG6719	CG6719	NA
FBgn0036004	1634092_at	1.158	10.345	1.6e-11	2.5e-10	10.01	11.16	Jarid2	CG3654	Jumonji%2C AT rich interactive domain 2
FBgn0004400	1625083_at	-2.781	5.949	1.6e-11	2.6e-10	6.8	4.01	rhi	CG10683	rhino
FBgn0038638	1627420_s_at	1.42	10.668	1.6e-11	2.6e-10	10.05	11.48	CG7702	CG7702	NA
FBgn0015765	1636173_s_at	1.161	10.063	1.6e-11	2.6e-10	9.6	10.76	Mpk2	CG5475	Mpk2
FBgn0014417	1634468_at	-1.779	7.269	1.6e-11	2.6e-10	7.71	5.93	CG13397	CG13397	NA
FBgn0040653	1626345_at	2.146	11.415	1.6e-11	2.6e-10	10.65	12.8	IM4	CG15231	Immune induced molecule 4
FBgn0013279	1632841_x_at	3.171	4.657	1.6e-11	2.6e-10	3.55	6.72	Hsp70Bc	CG6489	Heat-shock-protein-70Bc
FBgn0036481	1624787_s_at	2.796	4.79	1.6e-11	2.6e-10	3.75	6.55	CG16959	CG16959	NA
FBgn0000406	1632623_at	-2.247	11.356	1.6e-11	2.6e-10	12.2	9.95	Cyt-b5-r	CG13279	Cytochrome b5-related
FBgn0052177	1636837_at	1.018	9.457	1.6e-11	2.6e-10	9.13	10.14	CG32177	CG32177	NA
FBgn0026378	1631388_at	0.859	8.425	1.7e-11	2.6e-10	8.07	8.93	Rep	CG8432	Rab escort protein
FBgn0035715	1636812_at	1.292	10.055	1.7e-11	2.6e-10	9.61	10.9	CG10103	CG10103	NA
FBgn0038603	1640486_s_at	-1.776	8.94	1.7e-11	2.7e-10	9.62	7.85	PKD	CG7125	Protein Kinase D
FBgn0038190	1628127_at	-2.68	5.728	1.7e-11	2.7e-10	6.64	3.96	CG9926	CG9926	NA
FBgn0037647	1631776_at	1.091	9.728	1.8e-11	2.8e-10	9.34	10.43	RagA	CG11968	NA
FBgn0035266	1633956_s_at	-1.968	10.225	1.8e-11	2.8e-10	10.93	8.96	CG7995	CG7995	NA
FBgn0028381	1622960_at	1.673	11.857	1.8e-11	2.8e-10	11.18	12.85	decay	CG14902	death executioner caspase related to Apopain/Yama
FBgn0015372	1624618_at	1.203	8.9	1.9e-11	2.9e-10	8.43	9.63	chrw	CG3870	chrowded
FBgn0028515	1632026_at	1.073	9.541	1.9e-11	2.9e-10	9.13	10.2	EndoGI	CG4930	Endonuclease G inhibitor
FBgn0041342	1629930_s_at	1.044	9.723	1.9e-11	2.9e-10	9.35	10.4	Cct1	CG1049	CTP:phosphocholine cytidylyltransferase 1
FBgn0011828	1640097_at	0.952	7.732	1.9e-11	2.9e-10	7.43	8.38	Pxn	CG12002	Peroxidasin
FBgn0034394	1634762_a_at	-2.265	11.203	1.9e-11	2.9e-10	12.05	9.79	CG15096	CG15096	NA
FBgn0033134	1635370_at	1.652	9.855	1.9e-11	3e-10	9.19	10.84	Tsp42El	CG12840	Tetraspanin 42El
FBgn0001977	1627249_a_at	1.16	9.326	1.9e-11	3e-10	8.88	10.04	l(2)35Bg	CG4180	lethal (2) 35Bg
FBgn0015565	1634074_a_at	-2.529	9.163	1.9e-11	3e-10	9.96	7.43	yin	CG2913	yin
FBgn0003733	1638587_at	-2.104	6.859	1.9e-11	3e-10	7.51	5.41	tor	CG1389	torso
NA	1640955_s_at	2.854	5.419	1.9e-11	3e-10	4.35	7.2	NA	NA	NA
NA	1633642_at	-2.664	7.418	1.9e-11	3e-10	8.39	5.73	NA	NA	NA
FBgn0004419	1628017_a_at	-1.521	11.357	2e-11	3e-10	11.81	10.29	me31B	CG4916	maternal expression at 31B
FBgn0031881	1629040_at	0.926	8.725	2e-11	3e-10	8.56	9.48	CG3476	CG3476	NA
FBgn0031603	1628516_at	0.8	7.739	2e-11	3e-10	7.46	8.26	CG15432	CG15432	NA
FBgn0017558	1629515_at	-1.233	10.839	2e-11	3e-10	11.26	10.03	Pdk	CG8808	Pyruvate dehydrogenase kinase
FBgn0037976	1633651_at	1.757	9.421	2e-11	3.1e-10	8.88	10.63	Tk	CG14734	Tachykinin
FBgn0039755	1638528_at	-0.787	10.881	2e-11	3.1e-10	11.12	10.33	CG15531	CG15531	NA
FBgn0039326	1638226_at	1	11.425	2e-11	3.1e-10	11.23	12.23	CG10562	CG10562	NA
NA	1624348_a_at	0.685	9.535	2e-11	3e-10	9.26	9.94	NA	NA	NA
NA	AFFX-r2-Dros-GAPDH-3_at	-0.858	11.017	2e-11	3.1e-10	11.27	10.41	NA	NA	NA
FBgn0030912	1640327_at	0.87	7.264	2.1e-11	3.2e-10	6.95	7.82	CG6023	CG6023	NA
FBgn0032910	1624243_at	-1.015	8.786	2.1e-11	3.2e-10	9.16	8.15	CG9265	CG9265	NA
FBgn0053493	1632911_at	-1.601	9.314	2.1e-11	3.2e-10	9.88	8.28	CG33493	CG33493	NA
FBgn0016070	1638005_s_at	-2.552	9.675	2.1e-11	3.2e-10	10.42	7.87	smg	CG5263	smaug
FBgn0026713	1623333_a_at	0.811	7.612	2.1e-11	3.2e-10	7.34	8.15	l(1)G0007	CG32604	lethal (1) G0007
FBgn0036288	1630113_at	1.622	8.093	2.1e-11	3.2e-10	7.45	9.07	CG10660	CG10660	NA
FBgn0005563	1640614_at	2.147	5.107	2.1e-11	3.2e-10	4.31	6.46	cac	CG1522	NA
FBgn0029827	1638039_at	-1.421	10.571	2.2e-11	3.3e-10	11.42	10	CG6048	CG6048	NA
NA	1624571_s_at	0.772	10.046	2.2e-11	3.2e-10	9.83	10.6	NA	NA	NA
NA	1627121_s_at	1.033	4.793	2.2e-11	3.3e-10	4.38	5.41	NA	NA	NA
FBgn0015553	1631396_at	-2.937	6.812	2.3e-11	3.4e-10	7.72	4.78	tos	CG10387	tosca
FBgn0015296	1623967_at	1.451	9.124	2.3e-11	3.4e-10	8.52	9.97	Shc	CG3715	SHC-adaptor protein
FBgn0032836	1638675_at	-1.345	11.397	2.3e-11	3.4e-10	11.92	10.58	CG10680	CG10680	NA
FBgn0034913	1625742_at	0.903	9.901	2.3e-11	3.4e-10	9.57	10.47	usnp	CG11173	ubisnap
FBgn0029733	1637003_at	-3.362	7.001	2.3e-11	3.4e-10	8.09	4.73	CG6927	CG6927	NA
FBgn0031449	1639286_s_at	-1.26	10.193	2.3e-11	3.4e-10	10.7	9.44	CG31689	CG31689	NA
FBgn0030964	1631638_at	2.093	9.37	2.3e-11	3.4e-10	8.38	10.47	Pvf1	CG7103	PDGF- and VEGF-related factor 1
FBgn0033273	1641671_at	-1.641	8.094	2.3e-11	3.4e-10	8.65	7.01	CG2183	CG2183	NA
FBgn0030079	1631121_at	0.852	11.065	2.3e-11	3.4e-10	10.86	11.71	CG7267	CG7267	NA
FBgn0026380	1623021_at	0.682	11.821	2.3e-11	3.5e-10	11.53	12.21	Prosbeta3	CG11981	Proteasome beta3 subunit
FBgn0050387	1629408_s_at	-1.206	9.393	2.3e-11	3.4e-10	9.98	8.78	CG30387	CG30387	NA
NA	1641486_at	0.856	6.977	2.3e-11	3.5e-10	6.66	7.51	NA	NA	NA
FBgn0038390	1638806_at	-2.08	6.723	2.4e-11	3.5e-10	7.35	5.27	Rbf2	CG5083	Retinoblastoma-family protein 2
FBgn0040477	1625258_at	-2.706	6.131	2.4e-11	3.5e-10	6.97	4.27	cid	CG13329	centromere identifier
FBgn0032105	1634359_a_at	-2.371	8.449	2.4e-11	3.5e-10	9.14	6.77	borr	CG4454	borealin-related
FBgn0051636	1630168_at	-1.558	7.498	2.4e-11	3.5e-10	8.13	6.58	CG31636	CG31636	NA
FBgn0023395	1630786_at	-2.276	6.968	2.4e-11	3.6e-10	7.66	5.38	Chd3	CG9594	Chd3
FBgn0000567	1634440_s_at	1.17	8.609	2.4e-11	3.6e-10	8.23	9.4	Eip74EF	CG32180	Ecdysone-induced protein 74EF
FBgn0086785	1628278_at	0.884	8.294	2.5e-11	3.6e-10	7.96	8.84	Vps36	CG10711	Vacuolar protein sorting 36
FBgn0024432	1627017_at	0.694	10.74	2.5e-11	3.6e-10	10.42	11.11	Dlc90F	CG12363	Dynein light chain 90F
FBgn0035529	1641058_at	0.861	10.685	2.5e-11	3.7e-10	10.39	11.25	CG1319	CG1319	NA
NA	1623268_a_at	1.073	8.154	2.5e-11	3.6e-10	7.81	8.89	NA	NA	NA
FBgn0014011	1624321_at	0.833	10.289	2.6e-11	3.7e-10	9.89	10.72	Rac2	CG8556	Rac2
FBgn0035667	1636460_at	-3.542	10.731	2.6e-11	3.8e-10	11.75	8.2	Jon65Ai	CG10475	Jonah 65Ai
FBgn0038199	1629448_at	2.788	7.747	2.6e-11	3.8e-10	6.65	9.44	CG14358	CG14358	CCHamide-1
FBgn0024293	1635183_at	-1.313	12.041	2.6e-11	3.8e-10	12.56	11.25	Spn43Ab	CG1865	Serine protease inhibitor 43Ab
FBgn0039052	1632228_at	-1.667	8.655	2.6e-11	3.8e-10	9.29	7.62	CG6733	CG6733	NA
FBgn0035933	1629955_at	-1.685	10.1	2.7e-11	3.8e-10	10.6	8.92	CG13309	CG13309	NA
FBgn0003655	1633458_at	-3.537	7.754	2.7e-11	3.9e-10	8.85	5.31	swa	CG3429	swallow
FBgn0027558	1637584_at	2.675	9.478	2.7e-11	3.9e-10	8.39	11.06	pgant3	CG4445	polypeptide GalNAc transferase 3
FBgn0040102	1630256_at	1.388	6.698	2.8e-11	3.9e-10	6.29	7.68	lectin-24Db	CG2958	lectin-24Db
FBgn0037539	1623673_at	0.852	7.579	2.8e-11	3.9e-10	7.25	8.1	CG10435	CG10435	NA
FBgn0040850	1635688_at	2.903	9.948	2.8e-11	4e-10	8.58	11.49	CG15210	CG15210	NA
FBgn0005586	1625838_at	2.326	5.5	2.8e-11	4e-10	4.59	6.91	Rab3	CG7576	Rab-protein 3
FBgn0032935	1628475_at	1.462	8.778	2.8e-11	4.1e-10	8.17	9.63	CG8678	CG8678	NA
NA	1639729_s_at	2.201	9.617	2.8e-11	4e-10	8.47	10.67	NA	NA	NA
FBgn0087021	1628463_at	-2.142	6.993	2.9e-11	4.1e-10	7.58	5.44	Spc25	CG7242	Spc25
FBgn0038716	1629428_at	-1.42	4.933	2.9e-11	4.1e-10	5.44	4.02	CG7342	CG7342	NA
FBgn0031701	1623635_at	6.235	8.149	2.9e-11	4.1e-10	5.74	11.97	TotM	CG14027	Turandot M
FBgn0001308	1641312_at	0.701	9.916	2.9e-11	4.2e-10	9.64	10.34	Khc	CG7765	Kinesin heavy chain
FBgn0034248	1637988_at	0.845	10.28	2.9e-11	4.2e-10	9.99	10.84	CG14483	CG14483	NA
FBgn0053111	1630807_at	2.037	8.43	2.9e-11	4.2e-10	7.66	9.69	CG33111	CG33111	NA
FBgn0031662	1632503_at	0.717	9.069	3e-11	4.2e-10	8.77	9.49	CG3792	CG3792	NA
FBgn0031643	1633622_at	1.711	9.131	3e-11	4.2e-10	8.48	10.19	CG3008	CG3008	NA
FBgn0035425	1631724_s_at	0.959	10.518	3e-11	4.2e-10	10.18	11.14	CG17746	CG17746	NA
FBgn0031146	1637516_at	1.95	5.563	3e-11	4.2e-10	4.79	6.74	CG15449	CG15449	NA
FBgn0035906	1627845_at	0.627	11.238	3e-11	4.2e-10	10.99	11.62	CG6673	CG6673	NA
FBgn0033786	1638816_at	1.462	9.864	3e-11	4.2e-10	9.23	10.7	CG3884	CG3884	NA
FBgn0034400	1624237_at	1.138	9.205	3e-11	4.2e-10	8.76	9.9	CG15099	CG15099	NA
FBgn0028687	1630925_at	0.754	11.642	3.1e-11	4.4e-10	11.34	12.09	Rpt1	CG1341	Rpt1
FBgn0050287	1627091_at	2.617	5.441	3.1e-11	4.3e-10	4.46	7.08	CG30287	CG30287	NA
NA	1623300_at	-2.655	5.337	3.1e-11	4.4e-10	6.12	3.47	NA	NA	NA
FBgn0046322	1631486_at	2.109	9.303	3.2e-11	4.4e-10	8.47	10.58	p38c	CG33338	p38c
FBgn0030805	1623472_at	-1.931	6.52	3.2e-11	4.4e-10	7.13	5.2	wus	CG9089	wurst
FBgn0026056	1637284_at	0.98	8.466	3.2e-11	4.4e-10	8.13	9.11	Rlip	CG11622	Ral interacting protein
FBgn0035756	1633793_at	1.457	5.925	3.2e-11	4.4e-10	5.44	6.89	unc-13-4A	CG32381	unc-13-4A
FBgn0033129	1641508_s_at	1.159	7.629	3.2e-11	4.4e-10	7.29	8.45	Tsp42Eh	CG12844	Tetraspanin 42Eh
FBgn0002069	1629026_at	1.114	11.998	3.2e-11	4.4e-10	11.66	12.78	Aats-asp	CG3821	Aspartyl-tRNA synthetase
FBgn0032645	1641222_at	1.598	4.748	3.2e-11	4.4e-10	4.17	5.77	CG15142	CG15142	NA
NA	1637928_at	-1.68	8.551	3.2e-11	4.4e-10	9.25	7.57	NA	NA	NA
FBgn0003423	1640090_a_at	-1.087	8.542	3.3e-11	4.5e-10	8.93	7.85	slgA	CG1417	sluggish A
FBgn0004378	1624620_at	-1.271	7.137	3.3e-11	4.6e-10	7.48	6.21	Klp61F	CG9191	Kinesin-like protein at 61F
FBgn0003023	1641484_a_at	-4.681	7.213	3.4e-11	4.6e-10	8.72	4.04	otu	CG12743	ovarian tumor
FBgn0004456	1634290_a_at	1.576	7.346	3.4e-11	4.6e-10	6.76	8.33	mew	CG1771	multiple edematous wings
FBgn0000114	1625076_at	-2.508	10.109	3.4e-11	4.6e-10	10.89	8.38	aret	CG31762	arrest
FBgn0259791	1638411_at	-2.288	6.413	3.4e-11	4.7e-10	7.09	4.8	bora	CG6897	aurora borealis
FBgn0033528	1632396_at	0.774	8.772	3.5e-11	4.7e-10	8.47	9.24	trsn	CG11761	translin
FBgn0040954	1640352_at	0.843	11.349	3.5e-11	4.7e-10	11.04	11.88	CG13779	CG13779	NA
FBgn0037844	1637691_at	-3.417	7.864	3.5e-11	4.8e-10	8.91	5.49	CG4570	CG4570	NA
FBgn0027512	1627172_s_at	-1.839	9.302	3.5e-11	4.8e-10	9.9	8.07	CG10254	CG10254	NA
FBgn0035656	1640221_at	-1.046	8.347	3.5e-11	4.8e-10	8.66	7.61	CG10479	CG10479	NA
FBgn0030073	1628935_at	1.64	7.871	3.5e-11	4.8e-10	7.35	8.99	CG10962	CG10962	NA
FBgn0016697	1641432_a_at	0.699	11.71	3.5e-11	4.8e-10	11.42	12.12	Prosalpha5	CG10938	Proteasome alpha5 subunit
FBgn0028948	1637986_at	-1.651	5.292	3.5e-11	4.7e-10	6.13	4.48	CG15253	CG15253	NA
NA	1632932_a_at	1.89	8.096	3.5e-11	4.7e-10	7.39	9.28	NA	NA	NA
FBgn0025595	1629609_at	-1.771	5.371	3.6e-11	4.8e-10	6.09	4.32	GRHR	CG11325	Gonadotropin-releasing hormone receptor
FBgn0036516	1634652_a_at	1.399	8.636	3.6e-11	4.8e-10	8.12	9.52	CG7656	CG7656	NA
FBgn0001149	1628353_at	1.046	13.342	3.6e-11	4.8e-10	12.98	14.02	GstD1	CG10045	Glutathione S transferase D1
FBgn0033153	1625139_at	2.021	6.839	3.6e-11	4.8e-10	6.04	8.06	Gadd45	CG11086	Gadd45
FBgn0029091	1630206_at	-1.376	8.797	3.6e-11	4.8e-10	9.53	8.16	CS-2	CG7464	NA
NA	1639571_s_at	3.619	7.064	3.6e-11	4.8e-10	5.54	9.16	NA	NA	NA
FBgn0031654	1639196_at	-5.232	10.467	3.7e-11	4.9e-10	12.32	7.09	Jon25Bii	CG8869	Jonah 25Bii
FBgn0035309	1636857_at	-1.433	7.851	3.7e-11	4.9e-10	8.56	7.13	CG15879	CG15879	NA
FBgn0036548	1625343_at	0.821	9.336	3.7e-11	4.9e-10	9.08	9.91	CG5931	CG5931	NA
FBgn0032781	1639553_at	1.007	8.572	3.7e-11	5e-10	8.2	9.21	CG9987	CG9987	NA
FBgn0028546	1629423_at	0.648	9.635	3.7e-11	5e-10	9.38	10.03	ics	CG9031	icarus
FBgn0034512	1640144_at	1.328	12.607	3.8e-11	5e-10	12.11	13.44	CG18067	CG18067	NA
FBgn0039682	1625122_at	-0.984	12.642	3.8e-11	5e-10	12.97	11.99	Obp99c	CG7584	Odorant-binding protein 99c
FBgn0040551	1634106_at	1.498	11.244	3.9e-11	5.1e-10	10.57	12.07	CG11686	CG11686	NA
FBgn0037016	1629062_at	1.576	10.314	3.9e-11	5.1e-10	9.76	11.34	CG13252	CG13252	NA
FBgn0033205	1634019_at	2.834	10.767	3.9e-11	5.2e-10	9.65	12.49	CG2064	CG2064	NA
NA	1624542_at	0.98	5.896	3.9e-11	5.1e-10	5.56	6.54	NA	NA	NA
FBgn0004797	1636579_s_at	-1.125	9.036	4e-11	5.2e-10	9.41	8.29	mdy	CG31991	midway
FBgn0033395	1640566_at	1.333	9.627	4e-11	5.2e-10	9.14	10.47	Cyp4p2	CG1944	Cyp4p2
FBgn0024289	1639892_at	-1.656	8.664	4e-11	5.3e-10	9.38	7.72	Sodh-1	CG1982	Sorbitol dehydrogenase 1
FBgn0033130	1623094_at	1.657	8.54	4e-11	5.3e-10	7.84	9.5	Tsp42Ei	CG12843	Tetraspanin 42Ei
FBgn0040342	1631873_at	-1.999	9.676	4e-11	5.3e-10	10.35	8.35	CG3706	CG3706	NA
FBgn0052027	1633520_at	-2.382	6.573	4.1e-11	5.3e-10	7.26	4.88	CG32027	CG32027	NA
FBgn0086711	1633290_a_at	-1.976	6.977	4.1e-11	5.4e-10	7.53	5.56	mol	CG4482	moladietz
FBgn0003124	1636189_at	-2.102	8.516	4.2e-11	5.4e-10	9.13	7.03	polo	CG12306	polo
FBgn0035631	1627497_at	0.548	10.782	4.2e-11	5.4e-10	10.58	11.13	Txl	CG5495	Thioredoxin-like
FBgn0043903	1632381_at	1.078	9.916	4.2e-11	5.5e-10	9.4	10.48	dome	CG14226	domeless
FBgn0033226	1638693_s_at	0.876	11.454	4.2e-11	5.5e-10	11.21	12.09	CG1882	CG1882	NA
NA	1634920_at	1.069	8.8	4.2e-11	5.4e-10	8.42	9.49	NA	NA	NA
FBgn0053208	1623984_s_at	1.552	6.306	4.3e-11	5.6e-10	5.75	7.3	Mical	CG33208	Molecule interacting with CasL
FBgn0020622	1622909_at	1.628	10.421	4.3e-11	5.5e-10	9.78	11.41	Pi3K21B	CG2699	Pi3K21B
FBgn0035959	1636238_at	-2.299	7.403	4.3e-11	5.6e-10	8.07	5.78	CG4911	CG4911	NA
FBgn0038631	1630831_at	3.03	9.619	4.3e-11	5.6e-10	8.43	11.46	CG7695	CG7695	NA
FBgn0011692	1623405_at	-1.839	8.312	4.3e-11	5.6e-10	8.81	6.97	pav	CG1258	pavarotti
FBgn0030241	1637475_at	-2.095	8.376	4.4e-11	5.6e-10	9	6.91	feo	CG11207	fascetto
FBgn0023143	1640089_at	1.009	10.729	4.4e-11	5.7e-10	10.34	11.35	Uba1	CG1782	Ubiquitin activating enzyme 1
FBgn0037567	1628755_at	1.131	7.592	4.4e-11	5.7e-10	7.22	8.35	Gfr	CG9620	Gfr
FBgn0085227	1625557_at	2.062	9.146	4.4e-11	5.6e-10	8.28	10.34	CG34198	CG34198	NA
NA	1638457_at	-0.838	9.027	4.4e-11	5.6e-10	9.26	8.43	NA	NA	NA
FBgn0039925	1629874_at	2.011	5.589	4.5e-11	5.7e-10	4.82	6.83	Kif3C	CG17461	Kif3C
FBgn0010803	1638511_at	0.672	10.004	4.5e-11	5.7e-10	9.82	10.49	Aats-trp	CG9735	Tryptophanyl-tRNA synthetase
FBgn0030688	1629007_at	-1.197	11.863	4.5e-11	5.7e-10	12.31	11.11	CG8952	CG8952	NA
FBgn0024329	1639526_a_at	0.704	9.195	4.5e-11	5.7e-10	8.89	9.59	Mekk1	CG7717	Mekk1
FBgn0037551	1629715_at	0.817	9.134	4.5e-11	5.7e-10	8.91	9.73	Gie	CG7891	novel GTPase indispensable for equal segregation of chromosomes
FBgn0029924	1640002_at	-2.073	6.469	4.5e-11	5.7e-10	7.11	5.04	CG4586	CG4586	NA
FBgn0051133	1635895_at	1.178	7.144	4.6e-11	5.8e-10	6.73	7.91	CG31133	CG31133	Seryl-tRNA synthetase-like insect mitochondrial protein
FBgn0034894	1640962_s_at	1.265	10.334	4.6e-11	5.8e-10	9.82	11.08	CG4091	CG4091	NA
FBgn0025681	1640924_a_at	1.172	8.895	4.6e-11	5.8e-10	8.46	9.63	CG3558	CG3558	NA
FBgn0037339	1627996_a_at	1.026	9.801	4.6e-11	5.8e-10	9.4	10.43	Pi4KIIalpha	CG2929	Pi4KIIalpha
FBgn0005585	1639441_at	0.841	11.924	4.6e-11	5.8e-10	11.7	12.54	Crc	CG9429	Calreticulin
FBgn0039449	1626997_at	-1.774	5.601	4.6e-11	5.8e-10	6.15	4.38	CG6425	CG6425	NA
FBgn0036740	1638501_at	1.273	10.885	4.6e-11	5.8e-10	10.41	11.68	CG6259	CG6259	NA
FBgn0001114	1630515_s_at	-1.583	10.136	4.6e-11	5.8e-10	10.73	9.15	Glt	CG9280	Glutactin
FBgn0031599	1628599_at	-0.854	9.053	4.6e-11	5.8e-10	9.41	8.55	Psf2	CG18013	NA
NA	1623518_s_at	-1.307	11.474	4.6e-11	5.8e-10	11.95	10.64	NA	NA	NA
FBgn0029167	1628018_at	1.653	7.854	4.7e-11	5.8e-10	7.33	8.99	Hml	CG7002	Hemolectin
FBgn0036298	1638994_at	1.137	10.549	4.7e-11	5.9e-10	10.11	11.25	CG10627	CG10627	NA
FBgn0033529	1622941_at	0.538	10.494	4.7e-11	5.9e-10	10.29	10.83	CG17765	CG17765	NA
FBgn0026721	1629572_a_at	-1.232	9.58	4.7e-11	5.9e-10	10.09	8.86	fat-spondin	CG6953	fat-spondin
FBgn0036930	1627761_at	1.327	8.817	4.7e-11	5.9e-10	8.28	9.61	fat2	CG7749	NA
NA	AFFX-Dm-K01486-1_at	-1.346	5.595	4.7e-11	5.9e-10	7.3	5.96	NA	NA	NA
FBgn0030460	1639328_at	0.991	7.853	4.8e-11	5.9e-10	7.51	8.5	CG2453	CG2453	NA
FBgn0030710	1636096_at	-1.916	6.77	4.8e-11	5.9e-10	7.31	5.39	CG8924	CG8924	NA
FBgn0027529	1638929_at	-2.207	7.187	4.8e-11	5.9e-10	7.94	5.74	CG8920	CG8920	NA
FBgn0028688	1633594_at	0.891	10.568	4.8e-11	5.9e-10	10.23	11.12	Rpn7	CG5378	Rpn7
FBgn0051272	1639934_at	1.814	10.397	4.8e-11	6e-10	9.82	11.64	CG31272	CG31272	NA
FBgn0032253	1636976_at	-2.614	7.589	4.8e-11	6e-10	8.85	6.23	CG5322	CG5322	NA
FBgn0026084	1632105_a_at	1.272	11.914	4.8e-11	6e-10	11.36	12.63	cib	CG4944	ciboulot
FBgn0039821	1626577_at	1.348	9.304	4.8e-11	6e-10	8.86	10.2	CG15556	CG15556	NA
FBgn0032435	1630804_at	1.414	9.604	4.8e-11	5.9e-10	8.97	10.38	Oatp33Eb	CG6417	NA
FBgn0030341	1633304_at	0.939	8.361	4.9e-11	6e-10	8.05	8.99	p24-1	CG1967	p24-related-1
FBgn0001332	1637785_at	-1.053	10.331	4.9e-11	6e-10	10.76	9.71	L	CG10109	Lobe
FBgn0031768	1624890_s_at	0.672	8.893	4.9e-11	6e-10	8.67	9.34	CG12393	CG12393	NA
FBgn0039350	1641031_s_at	-1.641	8.359	5e-11	6.1e-10	8.86	7.22	jigr1	CG17383	jing interacting gene regulatory 1
FBgn0003867	1641143_s_at	-0.873	8.935	5e-11	6.1e-10	9.25	8.38	tsl	CG6705	torso-like
FBgn0032048	1630467_a_at	1.979	7.894	5e-11	6.1e-10	7.12	9.1	Dh31	CG13094	Diuretic hormone 31
FBgn0030607	1631173_at	-2.132	8.475	5e-11	6.1e-10	9.34	7.21	dob	CG5560	doppelganger von brummer
NA	1632699_s_at	-1.688	7.505	5e-11	6.1e-10	8.14	6.45	NA	NA	NA
FBgn0038035	1636131_at	1.1	8.04	5.1e-11	6.2e-10	7.65	8.75	lig3	CG17227	DNA ligase III
FBgn0031745	1626233_at	1.984	9.059	5.1e-11	6.2e-10	8.39	10.37	CG8965	CG8965	NA
FBgn0039644	1632676_s_at	-0.733	10.289	5.1e-11	6.2e-10	10.53	9.79	CG11897	CG11897	NA
FBgn0250835	1635945_at	1.6	7.141	5.1e-11	6.2e-10	6.47	8.07	CG15394	CG15394	NA
FBgn0043791	1633540_at	2.187	6.33	5.1e-11	6.2e-10	5.31	7.5	CG8147	CG8147	NA
FBgn0032744	1639676_at	1.258	7.183	5.1e-11	6.2e-10	6.75	8.01	CG15173	CG15173	NA
FBgn0037872	1636103_a_at	-0.821	10.081	5.1e-11	6.2e-10	10.4	9.58	nocturnin	CG31299	NA
FBgn0052053	1634185_at	1.072	7.186	5.2e-11	6.2e-10	6.7	7.78	CG32053	CG32053	NA
FBgn0004908	1641687_at	0.817	8.508	5.3e-11	6.3e-10	8.2	9.02	Arf84F	CG7435	ADP ribosylation factor 84F
FBgn0032035	1631595_at	0.756	10.526	5.3e-11	6.3e-10	10.26	11.01	CG13393	CG13393	NA
FBgn0035591	1625162_at	0.954	7.099	5.3e-11	6.4e-10	6.76	7.71	CG4611	CG4611	NA
FBgn0024361	1626767_at	1.677	11.818	5.3e-11	6.4e-10	11.11	12.79	Tsp2A	CG11415	Tetraspanin 2A
FBgn0085415	1624512_at	1.948	7.548	5.3e-11	6.3e-10	6.83	8.78	CG34386	CG34386	NA
FBgn0024912	1639904_at	1.018	7.734	5.4e-11	6.4e-10	7.4	8.42	agt	CG1303	O-6-alkylguanine-DNA alkyltransferase
FBgn0022710	1636219_at	-1.088	9.855	5.4e-11	6.4e-10	10.2	9.11	Ac13E	CG9210	Adenylyl cyclase 35C
FBgn0027539	1623543_at	-0.908	8.749	5.4e-11	6.4e-10	9.1	8.2	CG5807	CG5807	NA
FBgn0032699	1629398_at	1.154	8.875	5.4e-11	6.4e-10	8.46	9.62	CG10383	CG10383	NA
FBgn0003495	1641068_a_at	1.402	8.837	5.4e-11	6.4e-10	8.29	9.7	spz	CG6134	spatzle
FBgn0036945	1633446_s_at	1.511	12.516	5.4e-11	6.5e-10	11.86	13.37	CG6981	CG6981	NA
FBgn0030749	1625145_a_at	1.634	9.753	5.4e-11	6.5e-10	9.12	10.75	Anxb11	CG9968	Annexin B11
FBgn0050342	1638997_at	0.655	8.288	5.4e-11	6.5e-10	8.04	8.7	Prp38	CG30342	pre-mRNA processing factor 38
FBgn0030569	1629458_at	1.552	7.452	5.4e-11	6.4e-10	6.93	8.48	CG9411	CG9411	NA
FBgn0033915	1628969_s_at	-0.761	9.196	5.5e-11	6.5e-10	9.42	8.66	CG8485	CG8485	NA
FBgn0015240	1639398_at	0.904	10.089	5.5e-11	6.5e-10	9.78	10.68	Hr96	CG11783	Hormone receptor-like in 96
FBgn0035251	1626276_at	0.901	9.699	5.6e-11	6.6e-10	9.36	10.26	CG7967	CG7967	NA
FBgn0013732	1633243_at	-1.758	6.95	5.6e-11	6.6e-10	7.43	5.67	sced	CG3273	scrambled
FBgn0031461	1626766_s_at	-2.178	9.299	5.6e-11	6.6e-10	10.13	7.96	daw	CG16987	dawdle
FBgn0003943	1624230_s_at	0.724	12.419	5.6e-11	6.6e-10	12.16	12.88	Ubi-p63E	CG11624	Ubiquitin-63E
FBgn0003087	1634209_at	-3.371	8.764	5.7e-11	6.7e-10	9.77	6.4	pim	CG5052	pimples
FBgn0015038	1639495_at	1.53	8.793	5.7e-11	6.7e-10	8.4	9.93	Cyp9b1	CG4485	Cytochrome P450-9b1
NA	1624380_at	0.719	8.676	5.7e-11	6.7e-10	8.43	9.15	NA	NA	NA
FBgn0014469	1627844_at	-0.893	12.107	5.8e-11	6.8e-10	12.4	11.51	Cyp4e2	CG2060	Cytochrome P450-4e2
FBgn0020647	1637517_s_at	0.918	8.033	5.9e-11	6.9e-10	7.69	8.61	KrT95D	CG5405	Krueppel target at 95D
FBgn0086251	1626892_at	-1.51	8.148	5.9e-11	6.9e-10	8.59	7.08	del	CG9252	deadlock
FBgn0029134	1636559_s_at	0.664	12.021	6e-11	7e-10	11.75	12.42	Prosbeta5	CG12323	Proteasome beta5 subunit
FBgn0034733	1624290_at	-0.991	9.094	6e-11	7e-10	9.56	8.57	CG4752	CG4752	NA
FBgn0003292	1638012_at	-2.206	5.779	6e-11	7e-10	6.54	4.33	rt	CG6097	rotated abdomen
FBgn0038953	1634222_at	1.561	7.974	6e-11	7e-10	7.44	9	CG18596	CG18596	NA
FBgn0040087	1622968_at	1.182	8.703	6e-11	7e-10	8.31	9.5	p115	CG1422	p115
FBgn0005634	1627840_a_at	1.335	11.159	6e-11	7e-10	10.58	11.91	zip	CG15792	zipper
FBgn0030309	1637430_s_at	1.209	10.776	6e-11	7e-10	10.28	11.49	CG1572	CG1572	NA
FBgn0038912	1625756_at	-0.693	8.242	6.1e-11	7e-10	8.52	7.82	CG6656	CG6656	NA
FBgn0032656	1630550_a_at	1.022	8.436	6.1e-11	7.1e-10	8.05	9.07	CG5674	CG5674	NA
FBgn0001112	1626984_at	2.116	5.9	6.2e-11	7.1e-10	5.07	7.18	Gld	CG1152	Glucose dehydrogenase
FBgn0031779	1628795_s_at	0.732	7.871	6.3e-11	7.2e-10	7.62	8.35	CG9175	CG9175	NA
FBgn0034723	1641120_at	1.517	11.186	6.3e-11	7.3e-10	10.54	12.06	CG13506	CG13506	NA
FBgn0038538	1631331_a_at	-5.161	8.229	6.3e-11	7.3e-10	9.91	4.75	pxt	CG7660	NA
FBgn0033221	1630003_at	0.809	11.625	6.4e-11	7.4e-10	11.35	12.16	CG12825	CG12825	NA
NA	1629061_s_at	3.252	8.847	6.4e-11	7.4e-10	7.77	11.03	NA	NA	NA
NA	1638393_at	1.455	4.136	6.6e-11	7.6e-10	3.61	5.06	NA	NA	NA
NA	1636539_at	0.612	11.294	6.6e-11	7.5e-10	11.04	11.65	NA	NA	NA
FBgn0039249	1637383_at	1.033	8.208	6.7e-11	7.6e-10	7.84	8.87	CG11168	CG11168	NA
FBgn0051216	1640214_at	2.574	7.185	6.7e-11	7.7e-10	6.13	8.71	CG31216	CG31216	Nicotinamide amidase
FBgn0033401	1631304_a_at	0.805	8.85	6.7e-11	7.7e-10	8.63	9.43	CG1968	CG1968	NA
FBgn0015522	1628075_at	-1.134	8.77	6.7e-11	7.7e-10	9.19	8.06	olf186-M	CG14489	olf186-M
FBgn0036745	1628883_at	1.009	9.859	6.7e-11	7.7e-10	9.53	10.54	CG7484	CG7484	NA
FBgn0032981	1640207_at	-2.865	6.462	6.8e-11	7.7e-10	7.54	4.67	CG3635	CG3635	NA
FBgn0032075	1629358_s_at	0.587	13.033	6.8e-11	7.7e-10	12.83	13.42	Tsp29Fb	CG9496	Tetraspanin 29Fb
FBgn0086372	1636846_at	1.051	4.304	6.8e-11	7.7e-10	3.84	4.89	lap	CG2520	like-AP180
FBgn0002868	1632873_at	-0.6	14.248	6.8e-11	7.7e-10	14.49	13.89	MtnA	CG9470	Metallothionein A
FBgn0261393	1641650_at	1.015	9.798	6.8e-11	7.7e-10	9.49	10.5	alpha-Est5	CG1089	alpha-Esterase-5
NA	1639694_s_at	1.777	10.565	6.8e-11	7.7e-10	9.92	11.69	NA	NA	NA
FBgn0036547	1639353_at	-1.274	8.894	6.9e-11	7.8e-10	9.38	8.11	CG17032	CG17032	NA
FBgn0027088	1636948_a_at	0.766	9.405	6.9e-11	7.8e-10	9.14	9.91	Aats-gly	CG6778	Glycyl-tRNA synthetase
FBgn0004379	1631630_at	-2.126	7.274	6.9e-11	7.8e-10	7.92	5.8	Klp67A	CG10923	Kinesin-like protein at 67A
FBgn0046776	1630660_at	-1.352	7.981	7e-11	7.9e-10	8.52	7.17	CG14033	CG14033	NA
FBgn0034276	1639819_at	1.629	4.829	7e-11	7.9e-10	4.31	5.93	CG6385	CG6385	NA
FBgn0030334	1628715_a_at	1.939	5.779	7.1e-11	7.9e-10	5.11	7.05	Karl	CG4139	Karl
FBgn0011638	1631149_s_at	0.817	9.764	7.1e-11	8e-10	9.44	10.26	La	CG10922	La autoantigen-like
FBgn0028527	1627961_a_at	1.148	7.541	7.1e-11	8e-10	7.13	8.28	CG18507	CG18507	NA
FBgn0034261	1640577_a_at	-0.891	7.956	7.2e-11	8e-10	8.26	7.37	CG4966	CG4966	Hermansky-Pudlak Syndrome 4 ortholog
FBgn0029969	1638717_at	-0.705	9.858	7.2e-11	8e-10	10.14	9.44	CG10932	CG10932	NA
FBgn0031677	1635831_at	-4.881	8.076	7.3e-11	8.2e-10	9.64	4.76	CG14036	CG14036	NA
FBgn0033603	1636853_at	-1.225	6.196	7.4e-11	8.2e-10	6.65	5.43	Cpr47Ef	CG13214	Cuticular protein 47Ef
FBgn0030321	1637887_at	0.627	9.99	7.4e-11	8.2e-10	9.78	10.41	CG1703	CG1703	NA
FBgn0010038	1630258_at	3.676	8.982	7.4e-11	8.3e-10	7.49	11.17	GstD2	CG4181	Glutathione S transferase D2
NA	1637366_at	2.552	6.062	7.4e-11	8.3e-10	5.24	7.79	NA	NA	NA
FBgn0001128	1625949_at	-0.839	11.05	7.5e-11	8.3e-10	11.29	10.45	Gpdh	CG9042	Glycerol 3 phosphate dehydrogenase
FBgn0030501	1631037_at	-2.263	7.086	7.5e-11	8.4e-10	7.77	5.51	BthD	CG11177	BthD selenoprotein
FBgn0034883	1629642_a_at	-1.624	9.864	7.5e-11	8.4e-10	10.52	8.9	CG17664	CG17664	NA
FBgn0020249	1625223_a_at	0.529	11.269	7.6e-11	8.5e-10	11.09	11.62	stck	CG7954	steamer duck
FBgn0085415	1628010_at	1.968	5.279	7.6e-11	8.4e-10	4.56	6.53	CG34386	CG34386	NA
FBgn0052541	1639917_at	-1.064	6.126	7.7e-11	8.5e-10	6.41	5.35	CG32541	CG32541	NA
FBgn0050338	1640499_at	0.667	6.514	7.7e-11	8.5e-10	6.3	6.97	CG30338	CG30338	NA
FBgn0086758	1628005_at	1.991	5.794	7.7e-11	8.5e-10	4.95	6.94	chinmo	CG31666	Chronologically inappropriate morphogenesis
FBgn0027593	1628915_s_at	0.966	7.967	7.7e-11	8.5e-10	7.63	8.59	Exn	CG3799	NA
FBgn0035267	1623287_at	-2.002	6.382	7.8e-11	8.5e-10	6.96	4.96	CG13921	CG13921	NA
FBgn0052038	1639691_at	0.848	10.012	7.8e-11	8.5e-10	9.66	10.51	CG32038	CG32038	NA
FBgn0023479	1624957_a_at	-1.412	9.568	7.8e-11	8.5e-10	10.22	8.81	Tequila	CG4821	Tequila
FBgn0053108	1631039_at	0.956	6.794	7.8e-11	8.5e-10	6.4	7.36	CG33108	CG33108	NA
FBgn0027610	1635808_s_at	-0.764	10.899	8e-11	8.7e-10	11.26	10.49	CG8790	CG8790	Dicarboxylate carrier 1
FBgn0002968	1636146_at	1.31	8.915	8e-11	8.7e-10	8.39	9.7	Nrg	CG1634	Neuroglian
FBgn0051663	1623276_at	-1.079	7.744	8e-11	8.8e-10	8.15	7.07	CG31663	CG31663	NA
NA	1641245_a_at	1.702	6.761	8e-11	8.7e-10	6.05	7.75	NA	NA	NA
FBgn0029155	1641118_at	0.937	9.389	8.1e-11	8.8e-10	9.01	9.95	Mdh	CG5889	Malic enzyme b
FBgn0026257	1638204_s_at	-1.848	7.358	8.1e-11	8.8e-10	7.89	6.05	cav	CG6219	caravaggio
FBgn0032643	1625519_at	0.888	9.736	8.3e-11	9e-10	9.45	10.33	CG6453	CG6453	NA
FBgn0053555	1624207_at	0.875	7.498	8.3e-11	9.1e-10	7.16	8.03	btsz	CG33555	bitesize
FBgn0035583	1636910_at	1.352	12.205	8.4e-11	9.1e-10	11.62	12.97	CG13704	CG13704	NA
FBgn0010317	1640972_at	-2.509	5.468	8.5e-11	9.2e-10	6.27	3.77	CycJ	CG10308	Cyclin J
FBgn0030506	1641252_at	1.304	7.528	8.5e-11	9.2e-10	7.14	8.44	Lig4	CG12176	Ligase4
FBgn0034045	1640126_at	1.498	7.801	8.5e-11	9.2e-10	7.3	8.8	CG8249	CG8249	NA
FBgn0033374	1633051_at	-3.405	6.971	8.5e-11	9.2e-10	8.1	4.7	CG13741	CG13741	NA
FBgn0034290	1640400_at	-1.849	11.627	8.5e-11	9.2e-10	12.28	10.43	CG5773	CG5773	NA
FBgn0027506	1638875_at	-1	9.046	8.5e-11	9.2e-10	9.33	8.33	EDTP	CG6542	Egg-derived tyrosine phosphatase
FBgn0011695	1640565_at	0.682	13.24	8.5e-11	9.2e-10	12.96	13.64	PebIII	CG11390	Ejaculatory bulb protein III
NA	1635886_s_at	1.476	9.897	8.5e-11	9.2e-10	9.32	10.8	NA	NA	NA
FBgn0038195	1636708_at	0.757	10.954	8.6e-11	9.2e-10	10.68	11.44	CG3061	CG3061	NA
FBgn0046114	1640552_at	-1.097	7.861	8.6e-11	9.2e-10	8.33	7.23	Gclm	CG4919	Glutamate-cysteine ligase modifier subunit
FBgn0029507	1635191_at	1.079	12.356	8.6e-11	9.2e-10	11.88	12.96	Tsp42Ed	CG12846	Tetraspanin 42Ed
FBgn0035811	1626566_at	-1.091	11.786	8.6e-11	9.2e-10	12.11	11.02	CG12262	CG12262	NA
FBgn0033663	1631379_a_at	1.048	11.988	8.6e-11	9.2e-10	11.57	12.62	ERp60	CG8983	ERp60
FBgn0037408	1628982_at	1.203	5.493	8.6e-11	9.3e-10	5.07	6.27	NPFR1	CG1147	neuropeptide F receptor
FBgn0033786	1628581_at	1.187	11.973	8.7e-11	9.3e-10	11.48	12.66	CG3884	CG3884	NA
FBgn0034113	1628091_at	1.229	6.229	8.7e-11	9.3e-10	5.84	7.07	CG8060	CG8060	NA
FBgn0038039	1623448_at	0.913	9.503	8.7e-11	9.3e-10	9.26	10.18	CG5196	CG5196	NA
FBgn0030347	1640950_at	1.694	10.213	8.7e-11	9.3e-10	9.47	11.16	CG15739	CG15739	NA
FBgn0033377	1626864_at	1.21	9.224	8.8e-11	9.4e-10	8.73	9.94	Pmm45A	CG8073	Phosphomannomutase 45A
FBgn0000083	1640324_at	1.349	11.354	8.8e-11	9.4e-10	10.85	12.2	AnnIX	CG5730	Annexin IX
FBgn0024273	1625470_s_at	1.178	7.951	8.8e-11	9.3e-10	7.51	8.69	WASp	CG1520	WASp
FBgn0039640	1634302_s_at	-1.85	8.559	8.8e-11	9.3e-10	9.17	7.32	CG14516	CG14516	NA
FBgn0035708	1624347_s_at	2.572	5.325	8.8e-11	9.3e-10	4.37	6.94	CG8398	CG8398	NA
FBgn0011754	1624139_at	0.566	10.631	9e-11	9.5e-10	10.46	11.03	PhKgamma	CG1830	Phosphorylase kinase gamma
FBgn0000565	1625276_a_at	-2.064	9.397	9e-11	9.6e-10	10.09	8.02	Eip71CD	CG7266	Ecdysone-induced protein 28/29kD
FBgn0259896	1639502_at	1.997	7.177	9.2e-11	9.7e-10	6.48	8.48	nimC1	CG8942	nimrod C1
FBgn0030306	1637839_at	0.517	10.236	9.2e-11	9.7e-10	10.08	10.6	Spase25	CG1751	Spase 25-subunit
FBgn0039018	1631021_at	-1.705	6.292	9.2e-11	9.7e-10	6.81	5.11	CG4771	CG4771	NA
FBgn0037717	1641287_at	-1.528	5.51	9.4e-11	9.9e-10	5.99	4.46	CG8301	CG8301	NA
FBgn0039106	1631913_at	1.868	5.263	9.4e-11	9.9e-10	4.63	6.49	CG10301	CG10301	NA
FBgn0000114	1627834_a_at	-2.557	9.897	9.5e-11	1e-09	10.71	8.15	aret	CG31762	arrest
FBgn0039297	1637900_at	0.914	9.336	9.5e-11	1e-09	9.11	10.03	CG11852	CG11852	NA
NA	1623569_at	2.027	8.895	9.6e-11	1e-09	8.1	10.13	NA	NA	NA
FBgn0003137	1635210_a_at	1.595	10.351	9.7e-11	1e-09	9.8	11.4	Ppn	CG33103	Papilin
FBgn0029925	1626579_at	0.816	8.72	9.7e-11	1e-09	8.46	9.28	CG3040	CG3040	NA
FBgn0086697	1629217_at	-2.153	7.276	9.8e-11	1e-09	7.94	5.79	Cenp-C	CG31258	Cenp-C
FBgn0039430	1632675_s_at	-0.965	10.842	9.8e-11	1e-09	11.21	10.25	CG5455	CG5455	NA
FBgn0000659	1630305_at	1.255	8.248	1e-10	1e-09	7.73	8.99	fkh	CG10002	fork head
FBgn0052115	1623963_at	2.313	8.556	1e-10	1e-09	7.67	9.99	CG32115	CG32115	NA
FBgn0023535	1637548_at	-1.624	8.898	1e-10	1e-09	9.55	7.93	arg	CG18104	arginase
FBgn0043012	1627202_at	0.692	9.888	1e-10	1e-09	9.59	10.29	AP-2sigma	CG6056	AP-2sigma
FBgn0003483	1636886_at	-2.599	7.211	1e-10	1.1e-09	8.02	5.42	spn-E	CG3158	spindle E
FBgn0030799	1634788_at	1.47	7.884	1e-10	1.1e-09	7.35	8.82	CG4872	CG4872	NA
FBgn0250746	1630851_s_at	0.591	11.969	1e-10	1.1e-09	11.75	12.35	Prosbeta7	CG12000	Proteasome beta7 subunit
FBgn0051148	1637647_at	1.948	11.434	1e-10	1.1e-09	10.44	12.39	CG31148	CG31148	NA
FBgn0034367	1638795_at	0.794	7.937	1e-10	1.1e-09	7.65	8.45	sec6	CG5341	sec6
FBgn0032246	1624406_at	0.668	11.055	1e-10	1.1e-09	10.8	11.47	CG5168	CG5168	NA
FBgn0028969	1628472_at	0.72	10.75	1e-10	1.1e-09	10.53	11.25	deltaCOP	CG14813	delta-coatomer protein
FBgn0028479	1635745_a_at	-0.84	11.552	1e-10	1.1e-09	11.85	11.01	CG4389	CG4389	NA
FBgn0020496	1623106_s_at	0.718	9.672	1e-10	1.1e-09	9.38	10.1	CtBP	CG7583	C-terminal Binding Protein
FBgn0023541	1627180_at	-3.179	8.2	1.1e-10	1.1e-09	9.41	6.24	Cyp4d14	CG3540	Cyp4d14
FBgn0031061	1640794_at	0.706	7.713	1.1e-10	1.1e-09	7.45	8.15	CG14232	CG14232	NA
FBgn0033340	1627782_at	1.088	9.29	1.1e-10	1.1e-09	8.88	9.96	CG13751	CG13751	NA
FBgn0031434	1624375_at	-1.712	7.487	1.1e-10	1.1e-09	7.96	6.25	CG3227	CG3227	NA
FBgn0003429	1637301_a_at	-1.426	6.235	1.1e-10	1.1e-09	6.79	5.36	slo	CG10693	slowpoke
FBgn0033773	1640434_at	-3.364	6.376	1.1e-10	1.1e-09	7.47	4.11	mos	CG8767	mos
FBgn0015283	1635974_at	0.771	10.909	1.1e-10	1.1e-09	10.62	11.39	Pros54	CG7619	Proteasome 54kD subunit
FBgn0035608	1626606_at	0.931	4.396	1.1e-10	1.1e-09	4.08	5.01	CG10630	CG10630	blanks
FBgn0027091	1625878_at	0.759	8.487	1.1e-10	1.1e-09	8.27	9.02	Aats-cys	CG8431	Cysteinyl-tRNA synthetase
FBgn0033669	1626981_s_at	0.713	10.071	1.1e-10	1.1e-09	9.81	10.52	CG8979	CG8979	NA
FBgn0010611	1634072_s_at	0.886	10.695	1.1e-10	1.1e-09	10.4	11.29	Hmgs	CG4311	HMG Coenzyme A synthase
FBgn0040493	1636125_a_at	0.574	9.669	1.1e-10	1.2e-09	9.42	9.99	granny-smith	CG7340	granny smith
FBgn0250747	1635818_at	0.904	9.245	1.1e-10	1.1e-09	8.9	9.8	l(2)gd1	CG4713	NA
FBgn0051259	1625270_at	-2.238	8.04	1.1e-10	1.1e-09	9.23	7	CG31259	CG31259	NA
FBgn0035176	1637224_at	3.837	11.401	1.1e-10	1.2e-09	10.08	13.92	CG13905	CG13905	NA
FBgn0031435	1626264_at	-2.186	7.522	1.1e-10	1.1e-09	8.14	5.95	CG9883	CG9883	NA
FBgn0051715	1633260_at	1.314	10.396	1.2e-10	1.2e-09	9.85	11.17	CG31715	CG31715	NA
FBgn0032793	1627330_at	1.089	7.674	1.2e-10	1.2e-09	7.29	8.38	CG10189	CG10189	NA
FBgn0030668	1625297_at	-0.991	10.427	1.2e-10	1.2e-09	10.81	9.82	CG8128	CG8128	NA
FBgn0024179	1640409_at	-1.564	9.536	1.2e-10	1.2e-09	10.13	8.56	wit	CG10776	wishful thinking
FBgn0038191	1632525_at	-3.598	6.492	1.2e-10	1.2e-09	7.63	4.03	CG9925	CG9925	NA
FBgn0025454	1625697_at	-0.791	13.471	1.2e-10	1.2e-09	13.69	12.9	Cyp6g1	CG8453	Cyp6g1
FBgn0030474	1635052_a_at	0.66	7.772	1.2e-10	1.2e-09	7.53	8.19	CG15747	CG15747	NA
FBgn0003888	1639503_at	2.848	11.004	1.2e-10	1.2e-09	9.68	12.53	betaTub60D	CG3401	beta-Tubulin at 60D
FBgn0000996	1624994_at	-1.61	8.737	1.2e-10	1.2e-09	9.2	7.59	dup	CG8171	double parked
FBgn0259225	1625724_at	1.405	4.496	1.2e-10	1.3e-09	3.98	5.38	Pde1c	CG42325	Phosphodiesterase 1c
FBgn0039520	1637732_at	-2.008	5.628	1.2e-10	1.2e-09	6.38	4.37	Gr98a	CG13976	NA
FBgn0052669	1623556_at	-1.617	8.394	1.2e-10	1.2e-09	9.18	7.56	CG32669	CG32669	NA
FBgn0032840	1624838_a_at	1.71	4.463	1.3e-10	1.3e-09	3.9	5.61	sNPF	CG13968	short neuropeptide F precursor
FBgn0052109	1637402_at	0.769	7.971	1.3e-10	1.3e-09	7.66	8.43	CG32109	CG32109	NA
FBgn0029769	1639642_a_at	-1.719	8.913	1.3e-10	1.3e-09	9.62	7.9	CG3239	CG3239	NA
FBgn0040600	1639443_at	0.9	10.367	1.3e-10	1.3e-09	10	10.91	CG13631	CG13631	NA
FBgn0043470	1630241_at	-1.076	12.157	1.3e-10	1.3e-09	12.52	11.44	lambdaTry	CG12350	lambdaTry
FBgn0051373	1638417_at	-0.924	10.316	1.3e-10	1.3e-09	10.68	9.75	CG31373	CG31373	NA
FBgn0039776	1628705_at	1.639	8.953	1.3e-10	1.3e-09	8.43	10.07	PH4alphaEFB	CG31022	prolyl-4-hydroxylase-alpha EFB
FBgn0025865	1640871_at	1.213	9.609	1.3e-10	1.3e-09	9.13	10.34	Cortactin	CG3637	Cortactin
FBgn0037845	1623916_at	-2.139	7.803	1.3e-10	1.3e-09	8.79	6.65	CG14694	CG14694	NA
FBgn0038662	1633597_at	-1.093	10.706	1.3e-10	1.3e-09	11.14	10.05	CG14290	CG14290	NA
FBgn0037850	1639704_at	2.052	5.586	1.3e-10	1.3e-09	4.96	7.01	CG14695	CG14695	NA
FBgn0004397	1631535_at	1.065	9.647	1.3e-10	1.3e-09	9.19	10.25	Vinc	CG3299	Vinculin
FBgn0024833	1623631_at	0.652	9.254	1.3e-10	1.3e-09	9.02	9.67	AP-47	CG9388	AP-47
FBgn0001089	1633914_at	-2.37	9.912	1.3e-10	1.3e-09	10.68	8.3	Gal	CG9092	beta galactosidase
FBgn0051710	1624929_at	1.007	7.257	1.3e-10	1.3e-09	6.77	7.77	CG31710	CG31710	NA
FBgn0029879	1631407_a_at	-2.141	5.67	1.3e-10	1.3e-09	6.34	4.2	APC7	CG14444	Anaphase promoting complex 7
FBgn0031653	1624506_at	-4.459	12.224	1.3e-10	1.3e-09	13.86	9.4	Jon25Biii	CG8871	Jonah 25Biii
FBgn0032929	1638868_at	-1.698	7.525	1.3e-10	1.3e-09	7.98	6.29	Mcm10	CG9241	Sensitized chromosome inheritance modifier 19
FBgn0069242	1629234_at	0.578	11.247	1.3e-10	1.3e-09	11.1	11.68	eca	CG33104	eclair
FBgn0027500	1631543_at	-2.425	8.149	1.3e-10	1.3e-09	8.89	6.47	spd-2	CG17286	NA
FBgn0036910	1628584_at	1.755	7.335	1.4e-10	1.3e-09	6.57	8.32	Cyp305a1	CG8733	Cyp305a1
FBgn0033079	1627302_at	-1.079	9.322	1.4e-10	1.3e-09	9.72	8.64	Fmo-2	CG3174	Flavin-containing monooxygenase 2
FBgn0052625	1623296_at	-2.08	7.298	1.4e-10	1.3e-09	7.87	5.79	CG32625	CG32625	NA
FBgn0002524	1626368_at	0.573	10.298	1.4e-10	1.3e-09	10.06	10.63	lace	CG4162	lace
FBgn0037723	1630830_a_at	-1.547	6.704	1.4e-10	1.4e-09	7.37	5.82	SpdS	CG8327	Spermidine Synthase
FBgn0032465	1633389_at	0.969	9.086	1.4e-10	1.4e-09	8.75	9.72	CG12404	CG12404	NA
FBgn0004198	1625385_at	1.261	6.837	1.4e-10	1.4e-09	6.42	7.69	ct	CG11387	cut
FBgn0039769	1629367_at	-3.144	8.601	1.4e-10	1.4e-09	9.8	6.65	CG15534	CG15534	NA
FBgn0002873	1628717_a_at	-1.729	5.335	1.4e-10	1.4e-09	5.85	4.12	mud	CG12047	NA
FBgn0052662	1639826_at	1.431	9.025	1.4e-10	1.4e-09	8.48	9.91	CG32662	CG32662	NA
FBgn0000567	1635639_a_at	1.359	7.895	1.5e-10	1.5e-09	7.42	8.78	Eip74EF	CG32180	Ecdysone-induced protein 74EF
FBgn0046876	1623289_at	-1.995	6.125	1.5e-10	1.4e-09	6.93	4.94	Obp83ef	CG31557	Odorant-binding protein 83ef
FBgn0003053	1622949_at	1.09	10.365	1.5e-10	1.4e-09	9.96	11.05	peb	CG12212	pebbled
FBgn0261394	1634820_at	0.784	11.275	1.5e-10	1.4e-09	10.98	11.76	Pros29	CG9327	Proteasome 29kD subunit
FBgn0023529	1628194_at	0.851	10.992	1.5e-10	1.4e-09	10.77	11.62	CG2918	CG2918	NA
FBgn0015001	1632540_at	-1.804	10.04	1.5e-10	1.4e-09	10.71	8.91	iotaTry	CG7754	iotaTrypsin
FBgn0017572	1628281_at	0.696	9.489	1.5e-10	1.4e-09	9.22	9.92	Mo25	CG4083	Mo25
FBgn0033170	1631228_a_at	-2.279	8.874	1.5e-10	1.4e-09	9.69	7.41	sPLA2	CG11124	secretory Phospholipase A2
FBgn0035640	1640938_at	-2.006	7.721	1.5e-10	1.4e-09	8.3	6.29	mad2	CG17498	mad2
FBgn0038237	1629322_at	-0.736	8.013	1.5e-10	1.4e-09	8.29	7.55	Pde6	CG8279	Phosphodiesterase 6
FBgn0033980	1632021_at	1.371	7.325	1.5e-10	1.4e-09	6.86	8.23	Cyp6a20	CG10245	Cyp6a20
FBgn0036921	1633804_at	0.819	12.468	1.5e-10	1.4e-09	12.16	12.98	RhoGDI	CG7823	RhoGDI
FBgn0034402	1632748_at	1.117	6.749	1.5e-10	1.5e-09	6.34	7.45	CG15084	CG15084	NA
FBgn0037656	1638463_at	0.666	6.655	1.5e-10	1.5e-09	6.39	7.05	CG11986	CG11986	NA
NA	AFFX-Dros-ACTIN_M_r_at	2.952	10.626	1.5e-10	1.5e-09	9.27	12.23	NA	NA	NA
FBgn0026755	1640109_at	-3.639	6.287	1.5e-10	1.5e-09	7.95	4.32	Ugt37b1	CG9481	NA
NA	1627173_at	0.91	9.092	1.5e-10	1.4e-09	8.72	9.63	NA	NA	NA
FBgn0036262	1639424_at	-1.539	9.366	1.6e-10	1.5e-09	9.92	8.38	CG6910	CG6910	NA
FBgn0010548	1627861_s_at	-0.933	10.278	1.6e-10	1.5e-09	10.63	9.7	Aldh-III	CG11140	Aldehyde dehydrogenase type III
FBgn0038476	1623919_a_at	-1.671	9.949	1.6e-10	1.5e-09	10.44	8.77	kuk	CG5175	kugelkern
FBgn0010590	1641616_at	0.531	11.348	1.6e-10	1.5e-09	11.14	11.67	Prosbeta1	CG8392	Proteasome beta1 subunit
FBgn0033476	1626170_at	0.839	11.241	1.6e-10	1.5e-09	11	11.84	CG18445	CG18445	oysgedart
FBgn0032451	1627925_at	0.819	10.017	1.6e-10	1.5e-09	9.69	10.51	spict	CG12292	spichthyin
FBgn0052758	1637506_at	0.968	8.712	1.6e-10	1.5e-09	8.38	9.34	CG32758	CG32758	NA
FBgn0003076	1633803_at	-1.55	11.307	1.6e-10	1.5e-09	11.96	10.41	Pgm	CG5165	Phosphogluconate mutase
FBgn0027945	1626366_at	-1.322	10.79	1.6e-10	1.5e-09	11.36	10.04	ppl	CG7758	pumpless
FBgn0030603	1640963_at	1.364	11.705	1.6e-10	1.5e-09	11.15	12.51	CG5541	CG5541	NA
FBgn0034312	1639621_at	2.29	8.918	1.6e-10	1.5e-09	8.09	10.38	CG10916	CG10916	NA
FBgn0039942	1640669_at	-0.969	8.71	1.6e-10	1.5e-09	9	8.03	CG17163	CG17163	NA
FBgn0015926	1628322_at	-2.155	6.797	1.6e-10	1.5e-09	7.43	5.28	dah	CG6157	discontinuous actin hexagon
FBgn0043455	1624613_at	0.528	8.539	1.6e-10	1.5e-09	8.32	8.85	CG5986	CG5986	NA
FBgn0025641	1629015_a_at	-1.332	8.519	1.6e-10	1.5e-09	8.97	7.64	DAAM	CG14622	Dishevelled Associated Activator of Morphogenesis
FBgn0035938	1641096_s_at	0.914	6.62	1.6e-10	1.5e-09	6.21	7.13	orb2	CG5735	NA
FBgn0052751	1630310_at	-5.376	7.568	1.6e-10	1.5e-09	9.26	3.88	CG32751	CG32751	NA
FBgn0031579	1640827_at	0.909	12.123	1.7e-10	1.6e-09	11.76	12.66	CG15422	CG15422	NA
FBgn0039666	1638812_at	3.427	5.572	1.7e-10	1.6e-09	4.4	7.83	CG11501	CG11501	NA
FBgn0031540	1639821_at	-1.409	7.378	1.7e-10	1.6e-09	7.75	6.34	CG3238	CG3238	NA
FBgn0027081	1640984_s_at	0.825	9.914	1.7e-10	1.6e-09	9.64	10.47	Aats-thr	CG5353	Threonyl-tRNA synthetase
FBgn0050269	1627958_at	1.47	11.379	1.7e-10	1.6e-09	10.77	12.24	CG30269	CG30269	NA
FBgn0034398	1627634_at	0.525	12.766	1.7e-10	1.6e-09	12.58	13.11	CG15098	CG15098	NA
NA	1629740_at	-2.494	10.604	1.7e-10	1.6e-09	11.32	8.83	NA	NA	NA
FBgn0041184	1637703_a_at	3.172	11.027	1.8e-10	1.6e-09	9.58	12.75	Socs36E	CG15154	Suppressor of cytokine signaling at 36E
FBgn0034936	1626725_at	0.725	9.101	1.8e-10	1.7e-09	8.87	9.6	CG2970	CG2970	NA
FBgn0035101	1632207_a_at	1.407	9.444	1.8e-10	1.7e-09	8.81	10.22	p130CAS	CG1212	p130CAS
FBgn0036702	1634899_a_at	0.985	10.024	1.8e-10	1.7e-09	9.68	10.67	CG6512	CG6512	NA
FBgn0038790	1628446_at	-1.865	11.896	1.8e-10	1.7e-09	12.5	10.64	MtnC	CG5097	Metallothionein C
FBgn0003345	1625515_a_at	0.865	10.183	1.8e-10	1.7e-09	9.82	10.69	sd	CG8544	scalloped
NA	1636217_at	-2.824	8.542	1.8e-10	1.7e-09	9.7	6.87	NA	NA	NA
NA	1628008_a_at	0.827	12.102	1.8e-10	1.7e-09	11.81	12.63	NA	NA	NA
FBgn0086365	1636800_at	1.335	7.12	1.9e-10	1.7e-09	6.69	8.03	Orct2	CG13610	Organic cation transporter 2
FBgn0003444	1634442_at	-0.725	8.281	1.9e-10	1.8e-09	8.52	7.79	smo	CG11561	smoothened
FBgn0027836	1640341_s_at	1.78	9.7	1.9e-10	1.8e-09	9.01	10.79	Dgp-1	CG5729	Dgp-1
FBgn0036615	1641223_at	0.83	8.249	1.9e-10	1.8e-09	7.96	8.79	CG4933	CG4933	NA
FBgn0016762	1625019_at	0.752	7.435	1.9e-10	1.8e-09	7.18	7.93	angel	CG12273	angel
FBgn0040259	1624156_at	1.16	10.395	1.9e-10	1.8e-09	10.05	11.21	Ugt86Da	CG18578	Ugt86Da
FBgn0028693	1640372_at	0.656	11.072	1.9e-10	1.8e-09	10.81	11.46	Rpn12	CG4157	Rpn12
FBgn0012049	1635904_s_at	-0.842	9.369	1.9e-10	1.7e-09	9.63	8.79	BtbVII	CG11494	NA
FBgn0052251	1633138_at	-1.149	6.116	1.9e-10	1.7e-09	6.51	5.36	CG32251	CG32251	NA
FBgn0035734	1624950_a_at	-1.506	6.798	2e-10	1.9e-09	7.48	5.98	CG14823	CG14823	NA
FBgn0034158	1632545_s_at	-0.566	8.575	2e-10	1.8e-09	8.79	8.22	CG5522	CG5522	NA
FBgn0027554	1624863_a_at	1.139	7.638	2e-10	1.8e-09	7.31	8.45	CG8042	CG8042	NA
FBgn0031772	1635621_at	0.744	8.978	2e-10	1.9e-09	8.7	9.45	CG13994	CG13994	NA
FBgn0003514	1624065_at	1.229	12.092	2e-10	1.9e-09	11.57	12.79	sqh	CG3595	spaghetti squash
FBgn0002673	1622992_at	-2.033	6.611	2e-10	1.9e-09	7.2	5.17	twe	CG4965	twine
FBgn0035043	1625816_at	1.139	9.582	2e-10	1.8e-09	9.09	10.23	CG4781	CG4781	NA
FBgn0038369	1638092_a_at	0.727	9.581	2.1e-10	1.9e-09	9.31	10.03	Arpc3A	CG4560	Arpc3A
FBgn0003870	1636673_s_at	1.23	9.021	2.1e-10	1.9e-09	8.53	9.76	ttk	CG1856	tramtrack
FBgn0038128	1628065_at	0.857	6.91	2.1e-10	1.9e-09	6.6	7.46	Ravus	CG15889	Ravus
FBgn0019830	1628991_at	-1.554	11.082	2.1e-10	1.9e-09	11.67	10.11	colt	CG3057	congested-like trachea
FBgn0010397	1629981_at	1.111	9.746	2.1e-10	1.9e-09	9.31	10.42	LamC	CG10119	Lamin C
NA	1630600_at	2.171	11.01	2.1e-10	1.9e-09	10.06	12.23	NA	NA	NA
FBgn0050049	1626400_at	-2.325	6.412	2.1e-10	1.9e-09	7.37	5.04	CG30049	CG30049	NA
FBgn0031985	1630764_at	0.978	9.572	2.2e-10	2e-09	9.19	10.17	CG8683	CG8683	NA
FBgn0039562	1636528_at	1.356	11.032	2.2e-10	2e-09	10.68	12.04	Gp93	CG5520	Glycoprotein 93
FBgn0086532	1625352_s_at	0.796	9.063	2.2e-10	2e-09	8.73	9.53	Spt-I	CG4016	Serine palmitoyltransferase subunit I
FBgn0053193	1628053_at	0.657	8.205	2.2e-10	2e-09	7.93	8.59	sav	CG33193	salvador
FBgn0030529	1631073_at	0.83	11.234	2.2e-10	2e-09	10.84	11.67	Clic	CG10997	Chloride intracellular channel
FBgn0034447	1638510_at	-1.13	8.693	2.2e-10	2e-09	9.04	7.91	CG7744	CG7744	NA
FBgn0052352	1623199_a_at	-1.326	9.576	2.2e-10	2e-09	10.08	8.76	CG32352	CG32352	NA
FBgn0033391	1632304_at	-1.057	5.028	2.3e-10	2e-09	5.6	4.54	CG8026	CG8026	NA
FBgn0031307	1637772_at	1.691	7.882	2.3e-10	2e-09	7.39	9.08	CG4726	CG4726	NA
FBgn0038854	1626768_at	0.909	8.366	2.3e-10	2e-09	8.1	9.01	CG7044	CG7044	NA
FBgn0020248	1641652_a_at	-3.152	6.317	2.3e-10	2.1e-09	7.4	4.25	stet	CG33166	stem cell tumor
FBgn0036487	1633113_at	1.133	8.249	2.3e-10	2.1e-09	7.81	8.95	CG6876	CG6876	NA
FBgn0035294	1641198_at	0.782	7.297	2.3e-10	2.1e-09	7	7.78	Mfap1	CG1017	Microfibril-associated protein 1
FBgn0034501	1638183_at	-0.993	9.683	2.3e-10	2.1e-09	10.02	9.03	CG13868	CG13868	NA
FBgn0002527	1631380_s_at	1.24	8.028	2.3e-10	2e-09	7.53	8.77	LanB1	CG7123	NA
FBgn0020388	1627246_at	0.943	9.066	2.4e-10	2.1e-09	8.74	9.69	Pcaf	CG4107	Pcaf
FBgn0013984	1629141_at	1.593	9.737	2.4e-10	2.1e-09	9.12	10.71	InR	CG18402	Insulin-like receptor
FBgn0025680	1628719_at	-0.84	8.062	2.4e-10	2.1e-09	8.43	7.59	cry	CG3772	cryptochrome
FBgn0040964	1623883_at	0.875	6.825	2.4e-10	2.2e-09	6.28	7.15	CG18661	CG18661	NA
FBgn0036813	1635143_at	0.914	10.678	2.4e-10	2.2e-09	10.31	11.23	Aut1	CG6877	Aut1
FBgn0036324	1630649_at	1.421	5.69	2.4e-10	2.2e-09	5.25	6.67	CG12520	CG12520	NA
FBgn0043362	1632057_at	1.344	7.343	2.4e-10	2.2e-09	6.82	8.17	bchs	CG14001	blue cheese
FBgn0041180	1634552_at	1.375	10.792	2.4e-10	2.2e-09	10.29	11.66	TepIV	CG10363	Thiolester containing protein IV
FBgn0043575	1629118_at	-4.709	11.586	2.4e-10	2.2e-09	13.7	8.99	PGRP-SC2	CG14745	PGRP-SC2
FBgn0040759	1628197_at	1.949	8.867	2.4e-10	2.2e-09	8.08	10.03	CG13177	CG13177	NA
NA	1641587_at	-1.033	6.075	2.4e-10	2.2e-09	6.56	5.53	NA	NA	NA
FBgn0002968	1626001_at	1.005	6.566	2.5e-10	2.2e-09	6.21	7.21	Nrg	CG1634	Neuroglian
FBgn0039638	1629901_at	-1.275	6.393	2.5e-10	2.2e-09	6.77	5.49	dgt6	CG11881	dim gamma-tubulin 6
FBgn0003527	1627009_at	-1.546	5.642	2.5e-10	2.2e-09	6.14	4.6	stil	CG8592	stand still
FBgn0033686	1623887_at	-1.165	6.01	2.5e-10	2.2e-09	6.38	5.22	Pimet	CG12367	NA
FBgn0001186	1625638_a_at	0.61	10.894	2.5e-10	2.2e-09	10.63	11.24	Hex-A	CG3001	Hexokinase A
FBgn0038881	1625033_at	1.813	7.859	2.5e-10	2.2e-09	7.07	8.89	CG16791	CG16791	NA
FBgn0053080	1632342_a_at	-1.436	9.55	2.5e-10	2.2e-09	10.2	8.77	CG33080	CG33080	NA
NA	1625698_at	5.837	5.802	2.5e-10	2.2e-09	3.61	9.45	NA	NA	NA
FBgn0031145	1627046_at	0.722	9.692	2.6e-10	2.2e-09	9.35	10.07	Ntf-2	CG1740	Nuclear transport factor-2
FBgn0065032	1623961_at	1.483	11.018	2.6e-10	2.3e-09	10.4	11.88	Arpc3B	CG8936	Arpc3B
FBgn0004649	1626299_at	-3.944	7.645	2.6e-10	2.3e-09	8.97	5.02	yl	CG1372	yolkless
FBgn0031050	1636320_at	0.704	8.264	2.6e-10	2.3e-09	8.01	8.72	Arp11	CG12235	Arp11
FBgn0086356	1634690_at	-2.089	7.401	2.6e-10	2.3e-09	7.99	5.9	tum	CG13345	tumbleweed
FBgn0038344	1641576_a_at	1.535	7.335	2.6e-10	2.3e-09	6.77	8.31	CG5205	CG5205	NA
FBgn0032297	1633795_a_at	-1.076	10.586	2.6e-10	2.3e-09	10.96	9.88	CG17124	CG17124	NA
FBgn0060296	1628875_at	1.167	6.927	2.6e-10	2.3e-09	6.46	7.63	pain	CG15860	painless
FBgn0010803	1635547_a_at	0.685	8.473	2.7e-10	2.3e-09	8.29	8.97	Aats-trp	CG9735	Tryptophanyl-tRNA synthetase
FBgn0034897	1635678_at	-0.848	10.161	2.7e-10	2.3e-09	10.49	9.64	CG11299	CG11299	Sestrin
FBgn0051641	1626294_a_at	-1.767	8.265	2.7e-10	2.3e-09	8.82	7.05	stai	CG31641	stathmin
FBgn0040069	1636507_at	-2.326	10.908	2.7e-10	2.3e-09	11.9	9.58	vanin-like	CG32754	vanin-like
FBgn0040843	1631522_x_at	-0.831	7.31	2.7e-10	2.3e-09	7.66	6.83	CG15213	CG15213	NA
FBgn0003134	1625806_at	-1.047	9.908	2.7e-10	2.3e-09	10.3	9.25	Pp1alpha-96A	CG6593	Protein phosphatase 1alpha at 96A
FBgn0032409	1626390_at	0.71	7.535	2.7e-10	2.4e-09	7.23	7.94	Ced-12	CG5336	Ced-12
FBgn0026314	1626970_at	-1.99	7.2	2.7e-10	2.4e-09	8.2	6.21	Ugt35b	CG6649	UDP-glycosyltransferase 35b
NA	AFFX-Dros-ACTIN_M_f_at	2.654	10.686	2.7e-10	2.3e-09	9.46	12.11	NA	NA	NA
FBgn0033104	1638030_at	0.805	7.308	2.8e-10	2.4e-09	7	7.81	CG15237	CG15237	NA
FBgn0052280	1627930_s_at	0.745	11.338	2.8e-10	2.4e-09	11.11	11.85	CG32280	CG32280	NA
FBgn0051140	1634447_at	1.017	7.169	2.8e-10	2.4e-09	6.81	7.83	CG31140	CG31140	NA
FBgn0033191	1639416_at	0.604	9.786	2.8e-10	2.4e-09	9.59	10.19	CG1598	CG1598	NA
FBgn0021825	1638059_at	0.708	9.791	2.8e-10	2.4e-09	9.51	10.21	Dmn	CG8269	Dynamitin
FBgn0051116	1629786_a_at	-0.872	8.558	2.8e-10	2.4e-09	8.93	8.06	CG31116	CG31116	Chloride channel-a
FBgn0001202	1628673_at	0.625	9.039	2.8e-10	2.4e-09	8.82	9.45	hk	CG10653	hook
FBgn0086367	1638505_at	-1.372	8.212	2.8e-10	2.5e-09	8.71	7.33	t	CG12120	tan
NA	1624517_at	1.768	5.899	2.8e-10	2.4e-09	5.24	7.01	NA	NA	NA
FBgn0034215	1634972_at	-0.846	10.393	2.9e-10	2.5e-09	10.7	9.86	CG4802	CG4802	NA
FBgn0036627	1639276_at	1.974	8.031	2.9e-10	2.5e-09	7.27	9.25	CG4680	CG4680	NA
FBgn0027087	1631877_a_at	0.589	9.209	2.9e-10	2.5e-09	9.01	9.6	Aats-his	CG6335	Histidyl-tRNA synthetase
FBgn0000242	1624699_s_at	-1.485	7.378	2.9e-10	2.5e-09	7.86	6.38	Bx	CG6500	Beadex
FBgn0033088	1634541_a_at	0.553	8.074	2.9e-10	2.5e-09	7.88	8.44	CG3271	CG3271	NA
FBgn0035661	1629050_at	-0.95	12.108	2.9e-10	2.5e-09	12.27	11.32	CG10477	CG10477	NA
FBgn0024285	1628382_at	0.938	9.657	2.9e-10	2.5e-09	9.3	10.23	Srp54	CG4602	Srp54
FBgn0010313	1636864_at	-0.926	10.143	2.9e-10	2.5e-09	10.46	9.53	corto	CG2530	corto
FBgn0031070	1634457_at	-1.178	4.581	2.9e-10	2.5e-09	4.96	3.78	CG12702	CG12702	NA
FBgn0050431	1635271_at	-1.382	8.173	2.9e-10	2.5e-09	8.75	7.37	CG30431	CG30431	NA
FBgn0004598	1640470_s_at	-0.974	8.71	2.9e-10	2.5e-09	9.03	8.05	Fur2	CG18734	Furin 2
NA	1635709_at	0.885	10.872	2.9e-10	2.5e-09	10.61	11.5	NA	NA	NA
FBgn0034553	1622901_at	-1.141	8.138	2.9e-10	2.5e-09	8.58	7.44	CG9993	CG9993	NA
FBgn0026208	1634722_s_at	0.981	11.261	2.9e-10	2.5e-09	10.97	11.95	mbf1	CG4143	NA
NA	1633241_at	1.378	6.344	2.9e-10	2.5e-09	5.75	7.13	NA	NA	NA
FBgn0004106	1631861_at	-2.062	8.787	3e-10	2.5e-09	9.4	7.34	cdc2	CG5363	cdc2
FBgn0013749	1624693_at	0.717	11.912	3e-10	2.5e-09	11.64	12.36	Arf102F	CG11027	ADP ribosylation factor 102F
FBgn0001285	1639364_at	-3.335	10.445	3.1e-10	2.6e-09	11.6	8.26	Jon44E	CG8579	Jonah 44E
FBgn0012034	1641148_a_at	-1.205	12.446	3.1e-10	2.6e-09	12.93	11.72	AcCoAS	CG9390	Acetyl Coenzyme A synthase
FBgn0027335	1626315_at	0.651	9.692	3.1e-10	2.6e-09	9.41	10.06	Rip11	CG6606	Rab11 interacting protein
FBgn0035950	1641681_s_at	-1.164	10.216	3.1e-10	2.6e-09	10.7	9.54	CG5288	CG5288	NA
FBgn0033981	1624939_at	-1.796	10.033	3.2e-10	2.7e-09	10.68	8.89	Cyp6a21	CG10247	Cyp6a21
FBgn0031661	1628521_at	1.394	9.031	3.2e-10	2.7e-09	8.47	9.87	Gmd	CG8890	GDP-mannose 4%2C6-dehydratase
FBgn0031781	1636770_at	0.831	11.201	3.2e-10	2.7e-09	10.85	11.68	Arc-p20	CG5972	Arc-p20
FBgn0020637	1640975_at	-1.796	5.899	3.2e-10	2.7e-09	6.42	4.63	Lcp65Ag2	CG10534	Lcp65Ag2
FBgn0001086	1636341_at	-2.07	7.631	3.3e-10	2.8e-09	8.23	6.16	fzy	CG4274	fizzy
FBgn0031459	1632642_a_at	-0.721	11.712	3.3e-10	2.8e-09	12	11.28	CG2862	CG2862	NA
FBgn0028919	1629159_at	0.911	7.588	3.3e-10	2.8e-09	7.27	8.18	CG16865	CG16865	NA
FBgn0032955	1626079_a_at	-0.958	9.707	3.3e-10	2.8e-09	10.04	9.08	CG2201	CG2201	NA
FBgn0020306	1633331_at	-0.795	8.89	3.3e-10	2.8e-09	9.16	8.36	dom	CG9696	domino
FBgn0022772	1626652_at	-1.658	7.665	3.3e-10	2.8e-09	8.16	6.5	Orc1	CG10667	Origin recognition complex subunit 1
FBgn0037762	1632453_at	-0.7	12.207	3.3e-10	2.8e-09	12.45	11.75	eloF	CG16905	elongase F
NA	1637594_at	1.745	5.891	3.3e-10	2.8e-09	5.21	6.95	NA	NA	NA
FBgn0004107	1640394_s_at	-1.687	8.012	3.4e-10	2.8e-09	8.52	6.83	cdc2c	CG10498	cdc2c
FBgn0030411	1640452_at	0.841	8.689	3.4e-10	2.8e-09	8.37	9.21	CG2540	CG2540	NA
FBgn0086911	1628143_a_at	0.694	9.522	3.4e-10	2.9e-09	9.31	10	rg	CG6775	rugose
FBgn0050373	1639646_at	0.717	7.779	3.4e-10	2.9e-09	7.55	8.27	CG30373	CG30373	NA
FBgn0031776	1640263_at	0.76	9.744	3.4e-10	2.9e-09	9.41	10.17	CG13993	CG13993	NA
NA	1624619_s_at	2.218	4.471	3.4e-10	2.8e-09	3.75	5.97	NA	NA	NA
FBgn0034345	1634112_a_at	0.591	10.534	3.5e-10	2.9e-09	10.3	10.89	CG5174	CG5174	NA
FBgn0031356	1629600_at	0.781	10.018	3.5e-10	2.9e-09	9.67	10.45	CG17660	CG17660	NA
FBgn0040734	1631660_at	1.701	11.752	3.5e-10	2.9e-09	11.04	12.74	CG15065	CG15065	NA
FBgn0014857	1627685_a_at	0.784	11.461	3.5e-10	2.9e-09	11.14	11.93	His3.3A	CG5825	Histone H3.3A
FBgn0029172	1633820_at	-0.881	12.635	3.5e-10	2.9e-09	13.02	12.14	Fad2	CG7923	Fad2
FBgn0036727	1624670_at	0.796	8.424	3.5e-10	2.9e-09	8.22	9.02	CG7589	CG7589	NA
FBgn0004919	1627719_at	1.568	7.213	3.5e-10	2.9e-09	6.66	8.23	gol	CG2679	goliath
FBgn0032382	1623900_a_at	-1.28	9.198	3.6e-10	2.9e-09	9.69	8.41	CG14935	CG14935	Maltase B2
FBgn0034744	1635121_a_at	0.719	9.68	3.6e-10	3e-09	9.41	10.13	Vps20	CG4071	Vacuolar protein sorting 20
FBgn0051549	1629614_at	0.64	10.024	3.6e-10	3e-09	9.81	10.45	CG31549	CG31549	NA
FBgn0011660	1641382_at	-1.496	6.714	3.6e-10	3e-09	7.19	5.69	Pms2	CG8169	Pms2
FBgn0038595	1635282_at	2.229	7.305	3.6e-10	2.9e-09	6.4	8.63	CG7142	CG7142	NA
FBgn0053282	1625342_at	-2.37	6.982	3.6e-10	3e-09	8.15	5.78	CG33282	CG33282	NA
FBgn0002856	1624292_a_at	1.615	3.535	3.6e-10	3e-09	2.98	4.6	Acp26Ab	CG9024	NA
FBgn0034887	1635330_at	-1.097	5.964	3.7e-10	3e-09	6.48	5.38	CG5428	CG5428	NA
FBgn0003401	1630245_at	-1.478	7.621	3.7e-10	3e-09	8.06	6.59	shu	CG4735	shutdown
FBgn0002719	1629095_a_at	-1.359	12.171	3.7e-10	3e-09	12.72	11.36	Men	CG10120	Malic enzyme
FBgn0085205	1632575_at	0.628	11.88	3.7e-10	3e-09	11.63	12.26	CG34176	CG34176	NA
FBgn0086133	1623252_a_at	-0.602	11.068	3.7e-10	3e-09	11.35	10.75	kdn	CG3861	NA
FBgn0034122	1632714_at	-2.101	6.592	3.7e-10	3.1e-09	7.15	5.05	CG15711	CG15711	NA
FBgn0000147	1627325_at	-1.719	7.153	3.8e-10	3.1e-09	7.64	5.92	aur	CG3068	aurora
FBgn0039349	1635280_at	1.017	9.519	3.8e-10	3.1e-09	9.15	10.16	Ssadh	CG4685	Succinic semialdehyde dehydrogenase
FBgn0010100	1634989_at	-0.783	11.897	3.9e-10	3.1e-09	12.18	11.4	Acon	CG9244	Aconitase
FBgn0259101	1623371_at	-2.064	7.038	3.9e-10	3.2e-09	7.98	5.92	CG42249	CG42249	NA
FBgn0015558	1641265_at	-1.103	5.571	3.9e-10	3.2e-09	6	4.9	tty	CG1693	tweety
FBgn0053503	1639069_at	-1.914	5.141	4e-10	3.2e-09	5.95	4.03	Cyp12d1-d	CG33503	Cyp12d1-d
FBgn0036291	1626431_at	0.643	7.898	4e-10	3.3e-09	7.71	8.35	CG10681	CG10681	NA
FBgn0005672	1627453_s_at	0.849	9.335	4e-10	3.3e-09	8.96	9.8	spi	CG10334	spitz
FBgn0050277	1639429_at	-0.793	8.512	4e-10	3.2e-09	8.86	8.07	Oatp58Da	CG30277	NA
FBgn0039596	1638273_at	2.26	6.61	4e-10	3.2e-09	5.67	7.93	CG10000	CG10000	NA
FBgn0259740	1641408_at	1.147	10.415	4.1e-10	3.3e-09	10.02	11.16	CG42394	CG42394	NA
FBgn0024994	1639215_at	0.763	9.636	4.1e-10	3.3e-09	9.34	10.1	Csat	CG2675	Csat
FBgn0025697	1635522_a_at	-0.925	9.111	4.1e-10	3.3e-09	9.54	8.61	santa-maria	CG12789	scavenger receptor acting in neural tissue and majority of rhodopsin is absent
FBgn0031519	1624312_at	-1.13	5.687	4.1e-10	3.3e-09	6.02	4.89	CG3326	CG3326	NA
FBgn0010235	1626731_at	0.609	10.172	4.1e-10	3.3e-09	9.92	10.53	Klc	CG5433	Kinesin light chain
FBgn0050055	1629821_at	-1.077	8.365	4.1e-10	3.3e-09	8.71	7.63	CG30055	CG30055	NA
FBgn0002962	1632713_at	-5.803	8.633	4.1e-10	3.3e-09	10.52	4.72	nos	CG5637	nanos
FBgn0003717	1639321_s_at	-1.226	9.664	4.1e-10	3.3e-09	10.03	8.8	Tl	CG5490	NA
FBgn0259481	1640774_a_at	1.681	5.245	4.2e-10	3.4e-09	4.67	6.35	Mob2	CG11711	Mob2
FBgn0011509	1630713_at	0.561	8.725	4.2e-10	3.4e-09	8.54	9.1	SrpRbeta	CG33162	Signal recognition particle receptor beta
FBgn0027594	1638953_a_at	1.117	11.092	4.2e-10	3.4e-09	10.59	11.71	drpr	CG2086	draper
FBgn0030090	1625249_at	-1.842	6.571	4.2e-10	3.4e-09	7.15	5.3	fend	CG12664	forked end
FBgn0000063	1637781_at	-1.598	4.972	4.2e-10	3.4e-09	5.52	3.92	ald	CG7643	altered disjunction
FBgn0052196	1636151_at	0.971	8.384	4.2e-10	3.4e-09	8.09	9.06	CG32196	CG32196	NA
FBgn0032373	1636474_at	-0.811	11.218	4.2e-10	3.4e-09	11.64	10.83	CG12602	CG12602	Vacuolar H[+] ATPase subunit 100-5
FBgn0259170	1629744_a_at	0.949	8.397	4.2e-10	3.4e-09	7.97	8.92	alpha-Man-I	CG42275	alpha Mannosidase I
FBgn0027561	1629030_a_at	0.935	8.904	4.2e-10	3.4e-09	8.52	9.46	CG18659	CG18659	NA
FBgn0032449	1628221_at	-1.42	6.411	4.2e-10	3.4e-09	6.9	5.47	CG17036	CG17036	NA
FBgn0039025	1639202_a_at	0.591	8.236	4.3e-10	3.4e-09	8.04	8.63	CG7023	CG7023	NA
FBgn0022027	1639625_at	0.759	9.643	4.3e-10	3.4e-09	9.32	10.08	Vps25	CG14750	Vacuolar protein sorting 25
FBgn0005674	1626523_a_at	0.533	10.103	4.3e-10	3.4e-09	9.96	10.49	Aats-glupro	CG5394	Glutamyl-prolyl-tRNA synthetase
FBgn0036518	1637051_at	0.851	6.444	4.3e-10	3.4e-09	6.08	6.93	RhoGAP71E	CG32149	RhoGAP71E
FBgn0040372	1624780_at	-1.005	7.561	4.3e-10	3.5e-09	7.86	6.85	G9a	CG2995	G9a
FBgn0051036	1633971_at	2.548	4.886	4.3e-10	3.4e-09	4.06	6.6	CG31036	CG31036	NA
FBgn0003515	1641146_at	-1.263	8.563	4.4e-10	3.5e-09	9.16	7.9	st	CG4314	scarlet
FBgn0035049	1625761_a_at	1.556	8.044	4.5e-10	3.5e-09	7.37	8.93	Mmp1	CG4859	Matrix metalloproteinase 1
FBgn0035590	1636694_at	0.533	7.83	4.5e-10	3.6e-09	7.64	8.17	CG10673	CG10673	NA
FBgn0020415	1640202_at	-0.701	11.046	4.5e-10	3.6e-09	11.36	10.66	Idgf2	CG4475	Imaginal disc growth factor 2
FBgn0085421	1631112_at	1.897	8.144	4.5e-10	3.6e-09	7.41	9.31	Epac	CG34392	Epac
FBgn0037293	1638354_at	1.046	10.015	4.5e-10	3.6e-09	9.63	10.67	CG12007	CG12007	NA
FBgn0033413	1638735_at	-0.666	10.423	4.5e-10	3.6e-09	10.69	10.02	prel	CG8806	preli-like
FBgn0031450	1630393_a_at	0.996	9.132	4.6e-10	3.6e-09	8.75	9.75	Hrs	CG2903	Hepatocyte growth factor regulated tyrosine kinase substrate
FBgn0025335	1638874_at	0.52	10.382	4.6e-10	3.6e-09	10.2	10.72	CG4585	CG4585	NA
FBgn0037065	1632865_s_at	1.161	11.419	4.6e-10	3.6e-09	10.92	12.08	CG12974	CG12974	NA
FBgn0052195	1640590_at	0.968	9.076	4.6e-10	3.6e-09	8.84	9.81	CG32195	CG32195	NA
FBgn0028429	1623495_at	0.532	9.287	4.6e-10	3.7e-09	9.03	9.56	I-2	CG10574	Inhibitor-2
FBgn0047114	1625733_at	0.925	7.781	4.6e-10	3.7e-09	7.49	8.42	CG31142	CG31142	NA
NA	1631321_s_at	-2.369	10.023	4.6e-10	3.7e-09	10.71	8.34	NA	NA	NA
FBgn0031304	1641341_at	0.699	9.435	4.7e-10	3.7e-09	9.21	9.91	CG4552	CG4552	NA
FBgn0033113	1634958_at	1.248	7.476	4.7e-10	3.7e-09	7.01	8.26	CG9455	CG9455	Serpin 42Dc
FBgn0033757	1639471_s_at	-1.488	7.808	4.7e-10	3.7e-09	8.23	6.74	muskelin	CG8811	muskelin
FBgn0036571	1639938_at	0.98	8.037	4.7e-10	3.7e-09	7.69	8.67	CG12272	CG12272	NA
FBgn0028534	1623817_at	-1.418	12.66	4.7e-10	3.7e-09	13.27	11.85	CG7916	CG7916	NA
NA	1641693_s_at	-1.112	8.737	4.7e-10	3.7e-09	9.15	8.04	NA	NA	NA
FBgn0031498	1625081_at	0.855	7.631	4.8e-10	3.7e-09	7.34	8.2	CG17260	CG17260	NA
FBgn0031888	1630642_at	3.358	5.909	4.9e-10	3.8e-09	4.72	8.07	Pvf2	CG13780	PDGF- and VEGF-related factor 2
FBgn0016926	1633794_a_at	-0.736	11.151	4.9e-10	3.8e-09	11.41	10.68	Pino	CG4710	Pinocchio
FBgn0039056	1638770_a_at	0.914	8.763	4.9e-10	3.8e-09	8.37	9.28	cenB1A	CG6742	centaurin beta 1A
FBgn0035089	1632591_at	2.65	9.624	4.9e-10	3.8e-09	8.59	11.24	Phk-3	CG9358	Pherokine 3
FBgn0036007	1640075_a_at	-0.821	11.303	4.9e-10	3.9e-09	11.64	10.82	path	CG3424	pathetic
FBgn0038878	1628931_at	-1.143	6.663	5e-10	3.9e-09	7.1	5.96	CG3301	CG3301	NA
FBgn0010516	1632532_s_at	-0.549	11.752	5e-10	3.9e-09	11.95	11.4	wal	CG8996	walrus
FBgn0039003	1626657_a_at	1.612	7.368	5e-10	3.9e-09	6.79	8.4	wfs1	CG4917	wolfram syndrome 1
NA	1641367_at	0.971	9.682	5e-10	3.9e-09	9.48	10.45	NA	NA	NA
FBgn0039557	1625720_at	0.744	7.38	5.1e-10	3.9e-09	7.1	7.85	CG12259	CG12259	NA
FBgn0015591	1632752_at	1.571	9.528	5.1e-10	4e-09	9	10.57	Ast	CG13633	Allatostatin
FBgn0030351	1636902_at	1.082	8.427	5.1e-10	4e-09	8.07	9.15	CG1840	CG1840	NA
FBgn0000635	1640163_at	1.527	7.073	5.2e-10	4e-09	6.45	7.97	Fas2	CG3665	Fasciclin 2
FBgn0000927	1639097_at	-2.817	7.877	5.2e-10	4e-09	8.8	5.99	fs(1)Ya	CG2707	female sterile (1) Young arrest
FBgn0029763	1640240_s_at	-0.726	8.86	5.2e-10	4e-09	9.04	8.31	CG4165	CG4165	NA
NA	1641214_at	0.648	8.324	5.2e-10	4e-09	8.15	8.79	NA	NA	NA
FBgn0036759	1628682_at	-1.073	9.248	5.3e-10	4.1e-09	9.69	8.62	CG5577	CG5577	NA
FBgn0039691	1626880_at	0.554	8.098	5.3e-10	4.1e-09	7.83	8.38	CG1972	CG1972	NA
FBgn0053494	1629181_at	-1.001	11.202	5.3e-10	4.1e-09	11.6	10.6	CG33494	CG33494	NA
FBgn0243514	1627746_at	1.566	5.24	5.4e-10	4.1e-09	4.66	6.22	eater	CG6124	eater
FBgn0036824	1632980_at	-0.802	10.854	5.4e-10	4.2e-09	11.14	10.33	CG3902	CG3902	NA
FBgn0000099	1639498_a_at	-1.285	6.641	5.4e-10	4.2e-09	7.22	5.93	ap	CG8376	apterous
FBgn0030790	1636727_at	-1.141	7.962	5.4e-10	4.2e-09	8.27	7.13	CG4768	CG4768	NA
FBgn0043070	1636999_a_at	0.965	8.398	5.4e-10	4.2e-09	8.01	8.98	MESK2	CG15669	Misexpression suppressor of KSR 2
FBgn0035140	1636726_at	0.979	6.357	5.5e-10	4.2e-09	5.94	6.92	CG17180	CG17180	NA
FBgn0051004	1625278_s_at	1.862	11.307	5.5e-10	4.2e-09	10.52	12.38	CG31004	CG31004	NA
FBgn0024958	1627562_at	0.75	7.964	5.5e-10	4.2e-09	7.7	8.45	Irp-1A	CG4900	Iron regulatory protein 1A
FBgn0031522	1626664_at	-1.349	9.463	5.5e-10	4.2e-09	10.26	8.91	CG3285	CG3285	NA
FBgn0037664	1625738_at	-1.877	5.389	5.5e-10	4.2e-09	5.96	4.08	CG8420	CG8420	NA
FBgn0052306	1635771_a_at	0.824	10.587	5.6e-10	4.3e-09	10.21	11.04	CG32306	CG32306	NA
NA	1627899_at	1.07	5.092	5.6e-10	4.3e-09	4.61	5.68	NA	NA	NA
NA	1623648_s_at	1.272	10.033	5.6e-10	4.3e-09	9.52	10.79	NA	NA	NA
FBgn0028527	1638724_at	0.679	8.976	5.7e-10	4.3e-09	8.72	9.4	CG18507	CG18507	NA
FBgn0015268	1626785_at	-0.821	11.874	5.7e-10	4.3e-09	12.17	11.35	Nap1	CG5330	Nucleosome assembly protein 1
FBgn0036118	1628249_at	0.609	7.88	5.7e-10	4.3e-09	7.7	8.3	CG14145	CG14145	BLOC-1 subunit 2
FBgn0025373	1628428_at	1.069	10.373	5.7e-10	4.4e-09	9.96	11.03	Fpps	CG12389	Farnesyl pyrophosphate synthase
FBgn0000376	1641644_s_at	-1.256	6.778	5.8e-10	4.4e-09	7.15	5.89	crm	CG2714	cramped
FBgn0033942	1638869_at	1.05	8.89	5.8e-10	4.4e-09	8.47	9.52	Cpr51A	CG10112	Cuticular protein 51A
FBgn0037770	1636745_at	-1.136	8.053	5.8e-10	4.4e-09	8.4	7.26	Art4	CG5358	Arginine methyltransferase 4
FBgn0027605	1624050_at	0.701	9.449	5.9e-10	4.5e-09	9.16	9.86	Vps4	CG6842	Vacuolar protein sorting 4
FBgn0028968	1625155_a_at	0.6	10.31	5.9e-10	4.5e-09	10.12	10.72	gammaCop	CG1528	gamma-coatomer protein
FBgn0003328	1629803_a_at	2.289	8.946	5.9e-10	4.5e-09	7.92	10.21	scb	CG8095	scab
FBgn0033761	1627526_at	0.655	9.437	5.9e-10	4.5e-09	9.17	9.83	CG8778	CG8778	NA
FBgn0041713	1625405_at	1.234	8.351	6e-10	4.5e-09	7.94	9.17	yellow-c	CG4182	yellow-c
FBgn0002781	1625283_at	-1.115	6.012	6e-10	4.5e-09	6.33	5.22	mod(mdg4)	CG32491	modifier of mdg4
FBgn0026076	1624675_at	0.546	10.321	6e-10	4.5e-09	10.1	10.64	UBL3	CG9038	UBL3
FBgn0259749	1634606_a_at	0.906	10.486	6e-10	4.5e-09	10.07	10.97	mmy	CG9535	mummy
FBgn0037357	1628598_s_at	0.717	9.745	6e-10	4.6e-09	9.54	10.25	sec23	CG1250	NA
FBgn0040299	1631085_a_at	1.15	7.891	6.1e-10	4.6e-09	7.43	8.58	Myo28B1	CG6976	Myo28B1
FBgn0038549	1624963_at	-1.487	6.099	6.1e-10	4.6e-09	6.6	5.11	CG17802	CG17802	NA
FBgn0020416	1633237_at	1.164	10.797	6.1e-10	4.6e-09	10.43	11.6	Idgf1	CG4472	Imaginal disc growth factor 1
FBgn0032882	1641469_at	0.593	7.379	6.1e-10	4.6e-09	7.15	7.75	ns4	CG9320	nucleostemin 4
FBgn0032230	1634213_at	0.721	7.655	6.2e-10	4.6e-09	7.4	8.12	CG13139	CG13139	lowfat
FBgn0039634	1626972_at	0.83	9.097	6.2e-10	4.7e-09	8.84	9.67	CG11874	CG11874	NA
FBgn0000826	1638329_at	-2.063	6.646	6.2e-10	4.7e-09	7.27	5.21	png	CG11420	pan gu
FBgn0033792	1625235_at	-2.629	8.281	6.2e-10	4.7e-09	9.36	6.73	CG13325	CG13325	NA
FBgn0038344	1628807_at	1.237	9.061	6.3e-10	4.7e-09	8.61	9.85	CG5205	CG5205	NA
FBgn0039321	1639660_s_at	-1.347	11.092	6.3e-10	4.7e-09	11.67	10.32	CG10550	CG10550	NA
FBgn0086444	1635225_at	0.802	6.436	6.3e-10	4.7e-09	6.12	6.93	l(2)37Cb	CG10689	lethal (2) 37Cb
FBgn0023172	1634904_s_at	0.452	9.95	6.3e-10	4.7e-09	9.76	10.21	RhoGEF2	CG9635	RhoGEF2
FBgn0001230	1638872_at	1.42	6.912	6.3e-10	4.7e-09	6.45	7.87	Hsp68	CG5436	Heat shock protein 68
FBgn0037176	1636051_at	-3.003	7.209	6.3e-10	4.7e-09	8.59	5.59	CG14456	CG14456	NA
FBgn0037312	1623356_at	0.87	9.516	6.4e-10	4.8e-09	9.29	10.16	CG11999	CG11999	NA
FBgn0034915	1633284_at	0.86	9.156	6.4e-10	4.8e-09	8.84	9.7	eIF6	CG17611	eIF6
FBgn0035087	1633613_at	-0.645	12.908	6.4e-10	4.8e-09	13.1	12.45	CG2765	CG2765	NA
FBgn0032053	1623182_at	0.473	9.388	6.4e-10	4.8e-09	9.19	9.67	mRpL51	CG13098	mitochondrial ribosomal protein L51
FBgn0004655	1636092_a_at	-1.253	8.569	6.4e-10	4.8e-09	8.95	7.69	wapl	CG3707	wings apart-like
FBgn0051410	1623732_at	0.635	13.464	6.4e-10	4.8e-09	13.16	13.8	Npc2e	CG31410	Niemann-Pick type C-2e
FBgn0028961	1629186_a_at	2.294	4.838	6.5e-10	4.8e-09	3.79	6.08	AlstR	CG2872	Allatostatin Receptor
FBgn0032189	1623906_at	-1.171	7.707	6.5e-10	4.8e-09	8.04	6.87	Ripalpha	CG18145	RPA-interacting protein alpha
FBgn0027552	1640451_at	-0.89	11.822	6.5e-10	4.8e-09	12.16	11.27	CG10863	CG10863	NA
FBgn0261285	1624604_a_at	-1.143	6.805	6.5e-10	4.8e-09	7.19	6.04	Ppcs	CG5629	Phosphopantothenoylcysteine synthetase
FBgn0027620	1637574_at	-1.206	8.759	6.5e-10	4.8e-09	9.14	7.93	Acf1	CG1966	ATP-dependent chromatin assembly factor large subunit
FBgn0030230	1639837_at	1.929	4.297	6.5e-10	4.8e-09	3.59	5.52	Rph	CG11556	Rabphilin
FBgn0016715	1641722_at	-1.063	9.859	6.5e-10	4.8e-09	10.33	9.26	Reg-2	CG3200	Rhythmically expressed gene 2
FBgn0030775	1631148_at	-0.577	12.838	6.5e-10	4.8e-09	13.06	12.48	CG9673	CG9673	NA
FBgn0033635	1625950_a_at	-0.725	11.022	6.6e-10	4.9e-09	11.26	10.53	CG7777	CG7777	NA
FBgn0052687	1626724_at	-0.959	11.681	6.6e-10	4.8e-09	12.08	11.12	CG32687	CG32687	NA
FBgn0039487	1633778_at	-0.836	8.072	6.6e-10	4.9e-09	8.23	7.39	gb	CG6070	genderblind
FBgn0020653	1641487_a_at	0.48	10.776	6.7e-10	4.9e-09	10.65	11.13	Trxr-1	CG2151	Thioredoxin reductase-1
FBgn0026428	1632277_a_at	-1.205	8.908	6.7e-10	4.9e-09	9.37	8.16	HDAC6	CG6170	HDAC6
FBgn0085354	1633232_at	1.26	8.879	6.7e-10	4.9e-09	8.51	9.77	CG34325	CG34325	NA
FBgn0015582	1636137_at	0.65	7.752	6.7e-10	4.9e-09	7.52	8.17	dare	CG12390	defective in the avoidance of repellents
FBgn0002985	1625850_at	-1.6	8.253	6.7e-10	4.9e-09	8.82	7.22	odd	CG3851	odd skipped
FBgn0037606	1631092_at	-0.594	8.08	6.7e-10	4.9e-09	8.29	7.69	CG8032	CG8032	NA
NA	1639335_at	1.292	8.162	6.7e-10	4.9e-09	7.72	9.01	NA	NA	NA
FBgn0029128	1631714_a_at	0.806	5.815	6.8e-10	5e-09	5.49	6.29	SP71	CG17131	trynity
FBgn0031872	1629794_at	-1.121	6.703	6.8e-10	5e-09	7.03	5.91	iHog	CG9211	interference hedgehog
FBgn0259098	1626204_at	-0.838	7.477	6.8e-10	5e-09	7.82	6.98	CG42246	CG42246	NA
NA	1641365_s_at	0.871	10.097	6.8e-10	5e-09	9.7	10.57	NA	NA	NA
FBgn0003475	1635630_a_at	-0.653	8.188	6.9e-10	5e-09	8.41	7.75	spir	CG10076	spire
FBgn0030530	1625797_at	1.212	7.96	6.9e-10	5e-09	7.51	8.72	CG11063	CG11063	Ajuba LIM protein
FBgn0038396	1626514_at	0.819	7.835	6.9e-10	5.1e-09	7.56	8.38	CG5013	CG5013	NA
NA	1628989_at	1.049	6.155	6.9e-10	5e-09	5.67	6.72	NA	NA	NA
FBgn0040251	1641242_at	2.342	6.367	7e-10	5.1e-09	5.43	7.77	Ugt86Di	CG6658	Ugt86Di
FBgn0025742	1639757_at	0.778	8.625	7.1e-10	5.2e-09	8.35	9.13	mtm	CG9115	myotubularin
FBgn0042135	1637352_a_at	0.975	10.965	7.1e-10	5.2e-09	10.59	11.57	CG18812	CG18812	NA
FBgn0034854	1623264_at	0.839	8.765	7.1e-10	5.2e-09	8.49	9.33	CG3493	CG3493	NA
FBgn0004644	1626527_at	1.757	6.15	7.2e-10	5.2e-09	5.53	7.29	hh	CG4637	hedgehog
FBgn0039932	1634195_at	0.979	5.596	7.2e-10	5.2e-09	5.26	6.24	CG11093	CG11093	NA
NA	1634633_s_at	0.846	8.708	7.2e-10	5.3e-09	8.14	8.99	NA	NA	NA
FBgn0033434	1628929_s_at	1.31	11.259	7.3e-10	5.3e-09	10.75	12.06	CG1902	CG1902	NA
FBgn0033437	1628625_at	1.879	9.812	7.3e-10	5.3e-09	9.09	10.96	CG12926	CG12926	NA
FBgn0033204	1630212_at	2.61	8.89	7.4e-10	5.3e-09	7.97	10.58	CG2065	CG2065	NA
FBgn0032682	1636650_at	1.363	6.024	7.4e-10	5.4e-09	5.56	6.92	CG10176	CG10176	NA
FBgn0010349	1623383_at	0.515	10.215	7.4e-10	5.3e-09	10	10.51	Dhc64C	CG7507	NA
FBgn0035209	1636267_at	-1.809	6.725	7.5e-10	5.4e-09	7.22	5.41	msd1	CG13914	mitotic spindle density 1
FBgn0053158	1624658_at	1.181	7.224	7.5e-10	5.4e-09	6.83	8.01	CG33158	CG33158	NA
FBgn0029147	1625140_at	2.055	7.291	7.5e-10	5.4e-09	6.61	8.66	NtR	CG6698	NtR
FBgn0010497	1640405_at	-1.278	11.501	7.5e-10	5.4e-09	12.03	10.75	l(2)01810	CG5304	lethal (2) 01810
FBgn0037603	1630057_at	0.64	9.088	7.5e-10	5.4e-09	8.83	9.47	CG11753	CG11753	NA
FBgn0038020	1636174_at	2.525	9.758	7.6e-10	5.5e-09	8.88	11.4	GstD9	CG10091	Glutathione S transferase D9
FBgn0039204	1637992_at	0.84	7.851	7.6e-10	5.5e-09	7.63	8.47	CG6607	CG6607	NA
FBgn0004657	1639245_x_at	1.505	10.653	7.7e-10	5.5e-09	10.01	11.52	mys	CG1560	myospheroid
FBgn0023525	1623743_at	0.757	8.133	7.7e-10	5.5e-09	7.9	8.65	CG3191	CG3191	NA
FBgn0035948	1632376_at	1.555	4.651	7.8e-10	5.6e-09	4.03	5.59	CG5644	CG5644	NA
FBgn0035374	1632280_at	0.466	8.922	7.8e-10	5.6e-09	8.75	9.21	mRpS35	CG2101	mitochondrial ribosomal protein S35
FBgn0014020	1626808_s_at	1.094	12.038	7.8e-10	5.6e-09	11.56	12.66	Rho1	CG8416	Rho1
FBgn0030060	1637125_at	1.17	9.708	7.8e-10	5.6e-09	9.34	10.51	CG2004	CG2004	NA
FBgn0032006	1638143_a_at	0.93	8.966	7.8e-10	5.6e-09	8.59	9.52	Pvr	CG8222	PDGF- and VEGF-receptor related
FBgn0035375	1636337_s_at	1.356	10.077	7.8e-10	5.6e-09	9.5	10.85	pgant6	CG2103	polypeptide GalNAc transferase 6
FBgn0030994	1629671_at	1.518	6.916	7.9e-10	5.6e-09	6.29	7.81	CG14193	CG14193	NA
FBgn0037643	1630433_at	-1.01	11.167	8e-10	5.7e-09	11.54	10.53	skap	CG11963	skpA associated protein
FBgn0032215	1625571_at	0.611	9.184	8e-10	5.7e-09	8.97	9.58	CG5385	CG5385	NA
FBgn0037554	1636289_s_at	1.129	6.551	8e-10	5.7e-09	6.14	7.27	DNApol-iota	CG7602	DNApol-iota
FBgn0032731	1627515_at	0.862	9.724	8e-10	5.7e-09	9.47	10.33	CG10641	CG10641	NA
FBgn0004657	1634649_at	1.667	9.712	8.1e-10	5.8e-09	9.01	10.68	mys	CG1560	myospheroid
FBgn0037758	1632306_at	0.991	9.813	8.1e-10	5.8e-09	9.48	10.47	CG9467	CG9467	NA
FBgn0034924	1624381_at	-1.638	5.234	8.1e-10	5.8e-09	5.78	4.14	CG17658	CG17658	NA
FBgn0039529	1638193_at	1.141	6.774	8.1e-10	5.8e-09	6.38	7.52	CG5612	CG5612	NA
FBgn0037963	1641575_at	-1.048	8.023	8.2e-10	5.8e-09	8.34	7.3	Cad87A	CG6977	Cad87A
FBgn0015279	1631594_s_at	0.691	9.052	8.3e-10	5.9e-09	8.77	9.46	Pi3K92E	CG4141	Pi3K92E
FBgn0031245	1641294_a_at	-1.304	11.199	8.4e-10	6e-09	11.78	10.48	CG3625	CG3625	NA
NA	1633010_s_at	0.72	11.57	8.4e-10	6e-09	11.28	12	NA	NA	NA
FBgn0029508	1630145_s_at	0.955	9.773	8.5e-10	6e-09	9.41	10.36	Tsp42Ea	CG18817	Tetraspanin 42Ea
FBgn0025820	1632954_at	0.485	8.364	8.5e-10	6e-09	8.21	8.7	JTBR	CG1935	JTBR
FBgn0040827	1634002_at	-0.655	13.762	8.5e-10	6e-09	13.96	13.31	CG13315	CG13315	NA
FBgn0034432	1623788_at	-0.735	12.205	8.5e-10	6e-09	12.46	11.72	CG7461	CG7461	NA
FBgn0036732	1625041_at	-1.139	7.58	8.5e-10	6e-09	7.92	6.79	Oatp74D	CG7571	Organic anion transporting polypeptide 74D
FBgn0050424	1628503_at	1.05	8.928	8.6e-10	6e-09	8.55	9.6	CG30424	CG30424	NA
FBgn0036767	1623884_at	-2.715	9.933	8.6e-10	6.1e-09	10.38	7.66	CG16775	CG16775	NA
FBgn0037517	1636398_at	1.264	10.197	8.7e-10	6.1e-09	9.75	11.01	CG10086	CG10086	NA
FBgn0040843	1627583_at	-0.9	7.497	8.8e-10	6.2e-09	7.86	6.96	CG15213	CG15213	NA
FBgn0037291	1629027_at	0.786	5.951	8.8e-10	6.2e-09	5.75	6.54	CG14662	CG14662	NA
FBgn0024236	1641427_at	-0.655	8.88	8.8e-10	6.2e-09	9.13	8.47	foi	CG6817	fear-of-intimacy
FBgn0013548	1632914_at	-1.195	7.449	8.9e-10	6.2e-09	7.81	6.62	l(2)dtl	CG11295	lethal-(2)-denticleless
FBgn0051158	1633026_a_at	0.839	9.062	8.9e-10	6.2e-09	8.72	9.56	CG31158	CG31158	NA
FBgn0030699	1631790_at	0.821	8.997	8.9e-10	6.2e-09	8.67	9.49	CG8578	CG8578	NA
FBgn0039807	1634877_at	1.024	5.873	8.9e-10	6.3e-09	5.52	6.54	CG15546	CG15546	NA
FBgn0037637	1624986_at	0.586	11.536	9e-10	6.3e-09	11.34	11.93	CG9836	CG9836	NA
NA	1636213_at	1.542	6.275	9e-10	6.3e-09	5.87	7.41	NA	NA	NA
FBgn0027497	1639453_at	0.639	7.306	9.2e-10	6.4e-09	7.13	7.77	Madm	CG1098	MLF1-adaptor molecule
FBgn0033921	1638729_at	-1.704	6.643	9.2e-10	6.4e-09	7.09	5.39	CG8589	CG8589	tejas
FBgn0085215	1641123_at	0.578	9.996	9.2e-10	6.4e-09	9.79	10.37	CG34186	CG34186	NA
FBgn0015039	1635008_at	1.104	12.13	9.3e-10	6.5e-09	12.13	13.24	Cyp9b2	CG4486	Cytochrome P450-9b2
FBgn0029092	1638738_s_at	-1.063	10.272	9.3e-10	6.5e-09	10.61	9.55	ced-6	CG11804	ced-6
FBgn0038446	1636660_at	0.695	9.298	9.3e-10	6.5e-09	9.01	9.7	CG14903	CG14903	NA
FBgn0010097	1639192_at	-1.691	7.05	9.3e-10	6.5e-09	7.59	5.9	gammaTub37C	CG17566	gamma-Tubulin at 37C
FBgn0032066	1637357_at	-4.807	5.885	9.3e-10	6.5e-09	8.41	3.6	CG9463	CG9463	NA
FBgn0030670	1627102_at	0.653	11.82	9.4e-10	6.5e-09	11.56	12.22	Pis	CG9245	Phosphatidylinositol synthase
FBgn0023212	1631342_at	-0.524	10.725	9.4e-10	6.5e-09	10.95	10.43	Elongin-B	CG4204	Elongin B
FBgn0019949	1629487_at	0.544	8.373	9.4e-10	6.5e-09	8.14	8.69	Cdk9	CG5179	Cyclin-dependent kinase 9
FBgn0035496	1628332_at	-1.795	6.742	9.4e-10	6.5e-09	7.46	5.66	CG14990	CG14990	NA
FBgn0002878	1635302_at	-1.39	6.247	9.5e-10	6.6e-09	6.69	5.3	mus101	CG11156	mutagen-sensitive 101
NA	1622959_at	-2.102	7.071	9.5e-10	6.6e-09	7.76	5.66	NA	NA	NA
FBgn0051633	1623426_at	0.677	8.679	9.6e-10	6.7e-09	8.42	9.09	CG31633	CG31633	NA
FBgn0035444	1634135_at	0.79	10.156	9.6e-10	6.7e-09	9.86	10.65	CG12012	CG12012	NA
FBgn0259101	1630679_at	-1.072	11.426	9.7e-10	6.7e-09	11.94	10.87	CG42249	CG42249	NA
FBgn0027579	1632146_a_at	-0.926	10.474	9.7e-10	6.7e-09	10.8	9.87	CG5508	CG5508	NA
FBgn0035094	1629434_at	0.817	12.744	9.7e-10	6.7e-09	12.4	13.22	CG9380	CG9380	NA
FBgn0051778	1636682_at	-1.786	8.571	9.8e-10	6.7e-09	9.29	7.5	CG31778	CG31778	NA
FBgn0003268	1632559_at	-1.072	6.165	9.8e-10	6.8e-09	6.5	5.43	rod	CG1569	rough deal
FBgn0030928	1631801_at	-1.855	9.254	9.8e-10	6.8e-09	9.61	7.75	CG15044	CG15044	NA
FBgn0000083	1630286_at	1.605	11.21	1e-09	7.2e-09	10.55	12.15	AnnIX	CG5730	Annexin IX
FBgn0024273	1641653_at	1.235	10.427	1e-09	6.9e-09	9.93	11.17	WASp	CG1520	WASp
FBgn0036581	1631196_at	0.735	9.686	1e-09	6.9e-09	9.41	10.15	MED10	CG5057	Mediator complex subunit 10
FBgn0015541	1623503_at	2.073	10.422	1e-09	6.9e-09	9.57	11.64	sda	CG5518	slamdance
FBgn0037299	1636038_at	0.544	9.116	1e-09	6.9e-09	8.9	9.44	CG1115	CG1115	NA
FBgn0025352	1634869_at	-0.715	10.565	1e-09	6.9e-09	10.83	10.11	Thiolase	CG4581	Thiolase
FBgn0028926	1632384_at	0.705	7.339	1e-09	7e-09	7.09	7.79	NC2beta	CG4185	NC2beta
FBgn0017551	1631034_at	-1.557	7.759	1e-09	7e-09	8.22	6.66	Rca1	CG10800	Regulator of cyclin A1
FBgn0031977	1628610_at	0.698	10.19	1e-09	7.1e-09	9.87	10.56	baf	CG7380	barrier to autointegration factor
FBgn0039882	1634197_at	-1.053	9.178	1e-09	7.1e-09	9.66	8.6	CG11576	CG11576	NA
FBgn0015010	1625266_at	1.241	12.313	1e-09	7.2e-09	11.86	13.1	Ag5r	CG9538	Antigen 5-related
NA	1634699_a_at	-1.159	9.578	1e-09	6.9e-09	10.15	8.99	NA	NA	NA
FBgn0033584	1637758_at	-0.852	7.535	1.1e-09	7.2e-09	7.8	6.95	CG7737	CG7737	NA
FBgn0000043	1624471_s_at	2.415	12.251	1.1e-09	7.2e-09	11.1	13.52	Act42A	CG12051	Actin 42A
FBgn0035805	1624837_at	0.629	8.871	1.1e-09	7.3e-09	8.67	9.3	CG7506	CG7506	NA
FBgn0039319	1633857_at	2.019	9.481	1.1e-09	7.3e-09	8.95	10.97	CG13659	CG13659	NA
FBgn0030447	1633001_at	0.549	9.746	1.1e-09	7.3e-09	9.54	10.09	CG2200	CG2200	NA
FBgn0085203	1640652_at	0.884	7.022	1.1e-09	7.3e-09	6.69	7.57	CG34174	CG34174	NA
FBgn0037718	1641563_at	0.925	10.943	1.1e-09	7.4e-09	10.73	11.65	P58IPK	CG8286	P58IPK
FBgn0038053	1625324_at	-0.812	8.508	1.1e-09	7.4e-09	8.81	8	CG18549	CG18549	NA
FBgn0029002	1637645_at	1.671	9.12	1.1e-09	7.4e-09	8.41	10.08	miple2	CG18321	miple2
FBgn0030026	1627015_at	0.741	9.415	1.1e-09	7.5e-09	9.15	9.9	sni	CG10964	sniffer
FBgn0038424	1633362_at	0.635	8.218	1.1e-09	7.5e-09	7.95	8.59	CG17565	CG17565	NA
FBgn0031993	1629396_a_at	-0.725	7.597	1.1e-09	7.5e-09	7.9	7.17	CG8486	CG8486	NA
FBgn0036372	1633108_at	0.979	10.852	1.1e-09	7.5e-09	10.47	11.45	CG10083	CG10083	NA
FBgn0010278	1624815_at	1.028	8.621	1.1e-09	7.5e-09	8.23	9.26	Ssrp	CG4817	Structure specific recognition protein
FBgn0024177	1631078_at	-4.317	8.001	1.1e-09	7.6e-09	9.41	5.1	zpg	CG10125	zero population growth
FBgn0039626	1624639_at	0.692	7.671	1.1e-09	7.6e-09	7.41	8.1	Slu7	CG1420	Slu7
FBgn0033458	1639575_at	-2.076	7.657	1.1e-09	7.6e-09	8.38	6.31	CG18446	CG18446	NA
FBgn0259171	1626165_at	-1.641	6.607	1.1e-09	7.6e-09	7.27	5.63	Pde9	CG42276	Phosphodiesterase 9
FBgn0028419	1624305_at	0.624	11.57	1.1e-09	7.6e-09	11.39	12.01	Kr-h2	CG9159	Kruppel homolog 2
FBgn0039856	1628758_at	-2.07	8.463	1.1e-09	7.7e-09	9.19	7.12	CG1774	CG1774	NA
FBgn0047199	1634114_at	-1.989	5.288	1.1e-09	7.7e-09	5.85	3.86	CG31517	CG31517	NA
NA	1637557_a_at	0.714	8.822	1.1e-09	7.2e-09	8.5	9.22	NA	NA	NA
NA	1630298_at	0.892	6.782	1.1e-09	7.3e-09	6.45	7.34	NA	NA	NA
NA	1631526_s_at	-0.72	7.152	1.1e-09	7.6e-09	7.59	6.87	NA	NA	NA
FBgn0002732	1629601_at	1.927	6.708	1.1e-09	7.2e-09	5.87	7.79	malpha	CG8337	NA
FBgn0010303	1623804_a_at	1.163	5.334	1.2e-09	7.9e-09	4.84	6.01	hep	CG4353	hemipterous
FBgn0029121	1623918_at	0.81	9.445	1.2e-09	7.7e-09	9.12	9.93	Sras	CG4852	severas
FBgn0036918	1635177_at	0.518	10.064	1.2e-09	7.7e-09	9.79	10.31	CG7770	CG7770	NA
FBgn0027598	1633711_a_at	1.086	7.535	1.2e-09	7.7e-09	7.07	8.16	CG31012	CG31012	CIN85 and CD2AP orthologue
FBgn0040228	1623231_at	0.725	8.819	1.2e-09	7.8e-09	8.52	9.25	dyn-p25	CG10846	dynactin-subunit-p25
FBgn0039073	1626857_at	-1.556	7.319	1.2e-09	7.8e-09	7.84	6.28	CG4408	CG4408	NA
FBgn0045761	1624272_at	1.336	9.249	1.2e-09	7.8e-09	8.77	10.11	CHKov1	CG10618	CHKov1
FBgn0004872	1641305_at	-1.904	7.22	1.2e-09	7.9e-09	7.84	5.93	piwi	CG6122	piwi
FBgn0032587	1637499_s_at	1.266	9.461	1.2e-09	7.9e-09	8.89	10.16	CG5953	CG5953	NA
FBgn0037848	1633758_at	0.828	6.93	1.2e-09	7.9e-09	6.57	7.4	Tsp86D	CG4591	Tetraspanin 86D
FBgn0033452	1634598_a_at	0.892	10.508	1.2e-09	7.9e-09	10.14	11.03	CG1599	CG1599	NA
FBgn0032287	1623839_at	-1.309	7.643	1.2e-09	7.9e-09	8.29	6.98	CG6415	CG6415	NA
FBgn0004169	1630261_a_at	0.502	10.306	1.2e-09	8e-09	10.17	10.67	up	CG7107	upheld
FBgn0013998	1639023_at	0.752	8.925	1.2e-09	8e-09	8.65	9.4	Nsf2	CG33101	NEM-sensitive fusion protein 2
FBgn0036844	1637641_at	1.442	6.622	1.2e-09	8e-09	6.09	7.53	Mkp3	CG14080	Mitogen-activated protein kinase phosphatase 3
FBgn0010288	1624240_at	0.774	10.784	1.2e-09	8.1e-09	10.45	11.22	Uch	CG4265	Ubiquitin carboxy-terminal hydrolase
FBgn0034141	1635502_at	-0.941	10.004	1.2e-09	8.1e-09	10.38	9.44	CG8311	CG8311	NA
FBgn0039030	1633308_at	-0.927	9.857	1.2e-09	8.1e-09	10.17	9.24	CG6660	CG6660	NA
FBgn0004132	1623599_at	0.656	8.856	1.2e-09	8.2e-09	8.64	9.3	boca	CG30498	boca
FBgn0029994	1626503_at	-0.815	11.731	1.2e-09	8.2e-09	12.06	11.24	CG2254	CG2254	NA
FBgn0037330	1632596_at	0.535	8.976	1.2e-09	8.2e-09	8.73	9.27	mRpL44	CG2109	mitochondrial ribosomal protein L44
FBgn0052521	1634983_s_at	-0.887	9.343	1.2e-09	8.2e-09	9.74	8.85	CG32521	CG32521	NA
FBgn0000352	1633554_at	-0.898	8.554	1.2e-09	8.2e-09	8.8	7.9	cos	CG1708	costa
FBgn0011706	1624859_at	1.974	4.37	1.2e-09	8.2e-09	3.77	5.75	rpr	CG4319	reaper
FBgn0037955	1633885_s_at	-0.815	10.088	1.2e-09	8.2e-09	10.43	9.61	CG6950	CG6950	NA
FBgn0259169	1634481_at	0.639	9.204	1.2e-09	7.9e-09	8.97	9.61	RhoGAP18B	CG42274	NA
NA	1641570_s_at	0.904	10.652	1.2e-09	7.8e-09	10.27	11.17	NA	NA	NA
FBgn0039207	1632273_at	-0.78	8.37	1.3e-09	8.3e-09	8.65	7.87	CG5789	CG5789	NA
FBgn0032805	1629121_at	1.898	8.069	1.3e-09	8.3e-09	7.35	9.25	CG10337	CG10337	NA
FBgn0027094	1639644_at	0.661	9.064	1.3e-09	8.4e-09	8.85	9.51	Aats-ala	CG13391	Alanyl-tRNA synthetase
FBgn0031537	1629189_at	0.704	7.731	1.3e-09	8.4e-09	7.52	8.23	sec5	CG8843	sec5
FBgn0010441	1638252_at	0.85	8.076	1.3e-09	8.4e-09	7.78	8.63	pll	CG5974	pelle
FBgn0037778	1636340_at	0.517	7.239	1.3e-09	8.4e-09	7.06	7.58	mtTFB2	CG3910	mitochondrial transcription factor B2
FBgn0035539	1631441_s_at	1.033	5.514	1.3e-09	8.4e-09	5.21	6.24	CG7447	CG7447	slowdown
FBgn0000251	1635796_a_at	-0.657	10.256	1.3e-09	8.5e-09	10.49	9.84	cad	CG1759	caudal
FBgn0030261	1632772_at	-1.303	7.508	1.3e-09	8.5e-09	8.15	6.84	CG15203	CG15203	NA
FBgn0032210	1625543_s_at	0.987	7.348	1.3e-09	8.5e-09	6.94	7.93	CYLD	CG5603	cylindromatosis
FBgn0030170	1631131_a_at	-1.605	5.693	1.3e-09	8.6e-09	6.21	4.61	CG2990	CG2990	NA
FBgn0038681	1632114_at	-0.776	10.863	1.3e-09	8.6e-09	11.3	10.53	Cyp12a4	CG6042	Cyp12a4
FBgn0036980	1624530_at	-0.517	9.638	1.3e-09	8.7e-09	9.8	9.28	RhoBTB	CG5701	RhoBTB
FBgn0008635	1626340_at	0.739	9.888	1.3e-09	8.7e-09	9.67	10.41	betaCop	CG6223	beta-coatomer protein
FBgn0027375	1628264_a_at	-0.706	7.527	1.3e-09	8.7e-09	7.79	7.08	RecQ5	CG4879	homolog of RecQ
FBgn0004858	1631207_at	0.786	6.511	1.3e-09	8.7e-09	6.19	6.98	elB	CG4220	elbow B
FBgn0023540	1636461_at	-1.01	8.086	1.3e-09	8.8e-09	8.46	7.45	CG3630	CG3630	NA
NA	1633645_at	1.71	8.767	1.3e-09	8.6e-09	8.01	9.72	NA	NA	NA
FBgn0033137	1626351_at	1.864	5.204	1.3e-09	8.6e-09	4.51	6.38	Tsp42Ep	CG4471	NA
FBgn0030829	1624525_at	-2.587	8.738	1.3e-09	8.6e-09	9.85	7.26	CG12998	CG12998	NA
FBgn0030448	1634178_at	-0.76	8.776	1.3e-09	8.6e-09	9.03	8.27	CG4351	CG4351	NA
NA	1632458_at	-1.858	7.676	1.3e-09	8.7e-09	8.18	6.32	NA	NA	NA
NA	1632400_at	-1.783	8.454	1.3e-09	8.8e-09	9.25	7.47	NA	NA	NA
FBgn0035001	1623189_at	0.653	10.556	1.4e-09	8.8e-09	10.3	10.95	slik	CG4527	Sterile20-like kinase
FBgn0030040	1623761_at	1.096	12.756	1.4e-09	8.8e-09	12.24	13.34	CG15347	CG15347	NA
FBgn0028836	1623891_at	0.686	8.855	1.4e-09	8.8e-09	8.6	9.28	CSN7	CG2038	COP9 complex homolog subunit 7
FBgn0044050	1627943_at	1.499	6.829	1.4e-09	8.8e-09	6.22	7.71	Ilp3	CG14167	Insulin-like peptide 3
FBgn0014868	1625055_at	0.843	10.178	1.4e-09	8.8e-09	9.91	10.75	Ost48	CG9022	Oligosaccharyltransferase 48kD subunit
FBgn0038110	1622973_at	0.92	9.993	1.4e-09	8.9e-09	9.65	10.57	CG8031	CG8031	NA
FBgn0033350	1635281_at	0.663	8.84	1.4e-09	8.9e-09	8.67	9.33	CG8237	CG8237	NA
FBgn0045866	1631909_at	0.51	11.656	1.4e-09	9e-09	11.47	11.99	bai	CG11785	baiser
FBgn0037378	1638342_at	0.484	10.194	1.4e-09	9e-09	10.03	10.51	CG2046	CG2046	NA
FBgn0036573	1630543_at	0.768	8.484	1.4e-09	9e-09	8.25	9.02	CG5161	CG5161	NA
FBgn0028325	1635253_a_at	-0.408	11.307	1.4e-09	9e-09	11.45	11.04	l(1)G0334	CG7010	lethal (1) G0334
FBgn0001291	1635224_s_at	1.088	9.007	1.4e-09	9e-09	8.57	9.66	Jra	CG2275	Jun-related antigen
FBgn0036742	1637097_at	1.846	8.503	1.4e-09	9e-09	7.67	9.52	CG7497	CG7497	NA
FBgn0052554	1628802_at	0.902	6.192	1.4e-09	9.2e-09	5.89	6.79	CG32554	CG32554	NA
FBgn0032429	1641334_at	0.624	10.179	1.4e-09	9.2e-09	9.92	10.54	CG5446	CG5446	NA
FBgn0051717	1625710_at	0.613	9.935	1.4e-09	9.2e-09	9.69	10.3	CG31717	CG31717	NA
FBgn0034035	1639358_at	0.761	8.411	1.4e-09	9.3e-09	8.12	8.89	CG8207	CG8207	NA
FBgn0000636	1628543_a_at	1.536	6.601	1.4e-09	9.3e-09	5.87	7.41	Fas3	CG5803	Fasciclin 3
NA	1632834_a_at	0.58	10.036	1.4e-09	9.1e-09	9.83	10.41	NA	NA	NA
NA	1634204_at	0.994	9.784	1.4e-09	9.2e-09	9.38	10.38	NA	NA	NA
NA	1633810_at	0.641	7.81	1.4e-09	9e-09	7.61	8.25	NA	NA	NA
FBgn0030334	1633385_at	2.162	6.663	1.5e-09	9.5e-09	5.87	8.03	Karl	CG4139	Karl
FBgn0053296	1627994_at	1.62	4.446	1.5e-09	9.4e-09	3.97	5.59	CG33296	CG33296	NA
FBgn0026878	1640236_at	-1.487	6.266	1.5e-09	9.5e-09	7.25	5.76	CG4325	CG4325	NA
FBgn0039044	1625134_at	0.661	9.04	1.5e-09	9.5e-09	8.74	9.4	p53	CG33336	p53
FBgn0033465	1628777_at	-0.78	9.61	1.5e-09	9.5e-09	9.91	9.13	CG12140	CG12140	NA
FBgn0029854	1638923_at	0.625	10.368	1.5e-09	9.5e-09	10.18	10.81	CG3566	CG3566	NA
FBgn0038755	1636347_at	-0.678	7.259	1.5e-09	9.5e-09	7.47	6.79	Hs6st	CG4451	Heparan sulfate 6-O-sulfotransferase
FBgn0010225	1627060_s_at	-0.611	11.291	1.5e-09	9.6e-09	11.54	10.93	Gel	CG1106	Gelsolin
FBgn0034246	1641449_at	0.795	9.184	1.5e-09	9.6e-09	8.89	9.69	Dcr-2	CG6493	Dicer-2
FBgn0024321	1631303_s_at	1.811	8.041	1.5e-09	9.6e-09	7.25	9.06	NK7.1	CG8524	NK7.1
FBgn0003660	1635944_a_at	0.666	10.902	1.5e-09	9.6e-09	10.65	11.31	Syb	CG12210	Synaptobrevin
FBgn0036058	1628980_s_at	0.867	10.619	1.5e-09	9.6e-09	10.28	11.14	CG6707	CG6707	NA
FBgn0035944	1632417_a_at	0.778	10.603	1.5e-09	9.6e-09	10.32	11.09	CG5021	CG5021	NA
FBgn0038327	1627794_a_at	0.839	7.773	1.5e-09	9.6e-09	7.54	8.38	Trax	CG5063	Translin associated factor X
FBgn0032445	1641465_at	0.632	8.393	1.5e-09	9.6e-09	8.14	8.77	CG6153	CG6153	NA
FBgn0038861	1624669_at	0.743	8.128	1.5e-09	9.6e-09	7.88	8.62	CG7009	CG7009	NA
FBgn0037205	1627806_at	-1.897	5.097	1.5e-09	9.7e-09	5.7	3.8	CG11133	CG11133	NA
FBgn0051414	1630993_at	-1.751	5.972	1.5e-09	9.8e-09	6.76	5.01	CG31414	CG31414	NA
FBgn0004377	1626268_at	0.863	6.334	1.5e-09	9.4e-09	6.1	6.97	Klp54D	CG15844	NA
NA	1637934_at	1.267	5.108	1.5e-09	9.5e-09	4.56	5.83	NA	NA	NA
FBgn0037936	1622946_at	-1.924	9.922	1.6e-09	9.9e-09	10.53	8.61	CG6908	CG6908	NA
FBgn0039385	1628424_at	0.59	8.642	1.6e-09	9.9e-09	8.44	9.03	CG5913	CG5913	NA
FBgn0000319	1639985_s_at	0.439	11.86	1.6e-09	1e-08	11.69	12.13	Chc	CG9012	Clathrin heavy chain
FBgn0035936	1635267_s_at	-1.414	7.075	1.6e-09	1e-08	7.49	6.07	Tsp66E	CG4999	Tetraspanin 66E
FBgn0031253	1637226_at	1.625	10.008	1.6e-09	1e-08	9.27	10.89	CG11885	CG11885	NA
FBgn0031034	1634239_at	-2.826	9.032	1.6e-09	1e-08	9.89	7.07	CG14205	CG14205	NA
FBgn0050423	1625714_a_at	0.793	11.574	1.6e-09	1e-08	11.26	12.06	CG30423	CG30423	NA
FBgn0027505	1635631_a_at	0.615	8.062	1.6e-09	1e-08	7.84	8.46	rab3-GAP	CG7061	rab3-GAP
FBgn0053181	1634670_at	-0.719	11.211	1.6e-09	1e-08	11.46	10.74	CG33181	CG33181	NA
FBgn0033093	1625434_at	-1.076	9.323	1.6e-09	1e-08	9.68	8.6	CG3270	CG3270	NA
FBgn0002284	1623288_at	0.461	11.468	1.6e-09	1e-08	11.27	11.73	Pros26	CG4097	Proteasome 26kD subunit
FBgn0050377	1625421_at	-2.333	6.925	1.6e-09	1e-08	7.7	5.36	CG30377	CG30377	NA
FBgn0086679	1625934_at	-0.737	8.392	1.6e-09	1e-08	8.66	7.92	p	CG9770	pink
FBgn0036805	1630958_at	0.696	9.929	1.6e-09	1e-08	9.64	10.33	Chmp1	CG4108	Chmp1
FBgn0033427	1639995_a_at	0.814	6.394	1.6e-09	1e-08	6.09	6.91	CG1868	CG1868	NA
FBgn0024984	1623025_at	-1.143	5.382	1.6e-09	1e-08	5.67	4.53	CG3457	CG3457	NA
NA	1634865_at	1.453	5.467	1.6e-09	1e-08	4.96	6.41	NA	NA	NA
FBgn0011744	1623716_at	0.962	11.306	1.6e-09	1e-08	10.87	11.83	Arp66B	CG7558	NA
FBgn0032136	1628049_at	-0.782	11.157	1.7e-09	1e-08	11.54	10.76	CG15828	CG15828	NA
FBgn0003118	1630010_a_at	1.411	7.105	1.7e-09	1e-08	6.47	7.88	pnt	CG17077	pointed
FBgn0038449	1628818_at	-1.17	9.284	1.7e-09	1e-08	9.61	8.44	CG17562	CG17562	NA
FBgn0034387	1630170_at	-0.876	8.053	1.7e-09	1e-08	8.41	7.54	Cyp12b2	CG15077	Cyp12b2
FBgn0034405	1627773_a_at	-0.764	11.295	1.7e-09	1e-08	11.57	10.81	Jheh2	CG15102	Juvenile hormone epoxide hydrolase 2
FBgn0020510	1632196_at	0.826	9.243	1.7e-09	1.1e-08	8.89	9.72	Abi	CG9749	Abelson interacting protein
FBgn0002542	1634695_at	-1.353	7.976	1.7e-09	1.1e-08	8.38	7.02	lds	CG2684	lodestar
FBgn0051199	1636567_at	1.361	8.087	1.7e-09	1.1e-08	7.65	9.01	CG31199	CG31199	NA
FBgn0030737	1627854_at	-1.106	10.611	1.7e-09	1.1e-08	11.01	9.9	CG9914	CG9914	NA
FBgn0040636	1635919_at	-1.34	9.956	1.7e-09	1.1e-08	10.44	9.1	CG13255	CG13255	NA
FBgn0000152	1640260_at	0.853	6.348	1.7e-09	1.1e-08	6.06	6.91	Axs	CG9703	Abnormal X segregation
FBgn0016081	1631579_a_at	1.048	9.582	1.7e-09	1.1e-08	9.13	10.18	fry	CG32045	furry
FBgn0035588	1640492_at	-1.149	10.724	1.7e-09	1.1e-08	11.16	10.01	CG10672	CG10672	NA
FBgn0015075	1639264_at	0.669	7.923	1.7e-09	1.1e-08	7.71	8.38	Ddx1	CG9054	Dead-box-1
FBgn0014861	1632669_at	-1.413	8.445	1.7e-09	1.1e-08	8.89	7.48	Mcm2	CG7538	Minichromosome maintenance 2
FBgn0050272	1625760_at	-3.067	6.702	1.7e-09	1e-08	7.81	4.74	CG30272	CG30272	NA
FBgn0033830	1635913_at	5.362	7.519	1.7e-09	1.1e-08	5.54	10.9	CG10814	CG10814	NA
FBgn0003944	1633550_a_at	-0.746	6.377	1.7e-09	1.1e-08	6.67	5.92	Ubx	CG10388	NA
NA	1638015_at	1.011	5.011	1.7e-09	1.1e-08	4.66	5.68	NA	NA	NA
NA	AFFX-Dros-ACTIN_5_at	3.147	8.954	1.7e-09	1.1e-08	7.51	10.65	NA	NA	NA
FBgn0030833	1628853_at	-1.092	7.613	1.8e-09	1.1e-08	7.92	6.82	CG8915	CG8915	NA
FBgn0023512	1624008_at	0.551	9.294	1.8e-09	1.1e-08	9.1	9.65	eIF2B-epsilon	CG3806	eIF2B-epsilon
FBgn0086691	1634890_at	-0.756	10.768	1.8e-09	1.1e-08	11.04	10.29	UK114	CG15261	UK114
FBgn0034140	1631225_at	-1.481	10.344	1.8e-09	1.1e-08	11.04	9.56	CG8317	CG8317	NA
FBgn0024814	1628152_at	0.627	11.685	1.8e-09	1.1e-08	11.42	12.05	Clc	CG6948	Clathrin light chain
FBgn0040602	1629116_at	-4.44	8.192	1.8e-09	1.1e-08	9.62	5.18	CG14545	CG14545	NA
FBgn0040334	1628184_at	0.743	6.835	1.8e-09	1.1e-08	6.59	7.33	Tsp3A	CG10742	Tetraspanin 3A
FBgn0037025	1628318_at	-1.323	5.9	1.8e-09	1.1e-08	6.23	4.91	Spc105R	CG11451	Spc105-related
FBgn0027453	1634625_at	0.805	8.598	1.8e-09	1.1e-08	8.27	9.08	Dnz1	CG6627	DNZDHHC/NEW1 zinc finger protein 11
FBgn0027287	1627550_a_at	0.821	9.522	1.8e-09	1.1e-08	9.21	10.03	Gmap	CG33206	Golgi microtubule-associated protein
FBgn0033122	1640184_at	0.827	8.163	1.8e-09	1.1e-08	7.83	8.66	CG17002	CG17002	NA
FBgn0037882	1625165_at	0.706	7.332	1.8e-09	1.1e-08	7.09	7.79	CG17187	CG17187	NA
FBgn0037526	1624666_at	0.628	6.943	1.8e-09	1.1e-08	6.71	7.34	CG10092	CG10092	NA
FBgn0027929	1628174_at	1.276	6.298	1.8e-09	1.1e-08	5.95	7.23	nimB1	CG33119	nimrod B1
FBgn0010173	1627380_at	0.9	10.555	1.8e-09	1.1e-08	10.21	11.11	RpA-70	CG9633	Replication Protein A 70
FBgn0035470	1626344_at	0.85	6.971	1.8e-09	1.1e-08	6.74	7.59	CG14980	CG14980	NA
FBgn0053635	1627824_at	0.797	7.833	1.8e-09	1.1e-08	7.56	8.35	CG33635	CG33635	NA
FBgn0026567	1634887_at	0.615	11.457	1.8e-09	1.1e-08	11.27	11.88	Spase18-21	CG2358	NA
NA	1636123_at	1.036	9.987	1.8e-09	1.1e-08	9.58	10.61	NA	NA	NA
FBgn0035110	1624390_a_at	0.601	9.236	1.9e-09	1.1e-08	9.02	9.62	thoc7	CG17143	thoc7
FBgn0032350	1629207_at	-0.582	11.564	1.9e-09	1.1e-08	11.8	11.22	CG6287	CG6287	NA
FBgn0250876	1639542_at	1.267	7.702	1.9e-09	1.1e-08	7.2	8.46	Sema-5c	CG5661	Semaphorin-5c
FBgn0030551	1623347_at	-3.805	7.919	1.9e-09	1.1e-08	9.15	5.35	CG11674	CG11674	NA
FBgn0037547	1633357_at	-0.656	11.148	1.9e-09	1.1e-08	11.31	10.66	CG7910	CG7910	NA
FBgn0024995	1630821_at	-0.969	8.987	1.9e-09	1.1e-08	9.5	8.53	CG2680	CG2680	NA
FBgn0011760	1634599_s_at	0.666	10.893	1.9e-09	1.1e-08	10.64	11.31	ctp	CG6998	cut up
FBgn0027348	1634048_a_at	-0.961	10.077	1.9e-09	1.1e-08	10.42	9.46	bgm	CG4501	bubblegum
FBgn0026319	1627704_a_at	1.682	6.631	1.9e-09	1.2e-08	6.02	7.7	Traf4	CG3048	TNF-receptor-associated factor 4
FBgn0038760	1624006_at	0.59	7.212	1.9e-09	1.2e-08	7	7.59	MED25	CG12254	Mediator complex subunit 25
FBgn0036116	1627964_s_at	-1.095	7.986	1.9e-09	1.2e-08	8.43	7.34	CG7888	CG7888	NA
FBgn0038590	1639409_at	0.732	6.514	1.9e-09	1.2e-08	6.27	7	CG12320	CG12320	NA
FBgn0039250	1641713_a_at	-0.986	6.092	1.9e-09	1.2e-08	6.41	5.42	CG11120	CG11120	NA
FBgn0051759	1631299_s_at	-0.592	7.301	1.9e-09	1.2e-08	7.55	6.96	CG31759	CG31759	NA
FBgn0025837	1630612_at	-1.183	7.928	1.9e-09	1.2e-08	8.51	7.33	CG17636	CG17636	NA
FBgn0036984	1632238_at	1.861	5.304	1.9e-09	1.2e-08	4.61	6.47	CG13248	CG13248	NA
FBgn0051909	1638603_at	-1.142	6.243	1.9e-09	1.2e-08	6.55	5.41	CG31909	CG31909	NA
FBgn0259716	1631405_at	-1.379	7.701	1.9e-09	1.2e-08	8.29	6.91	CG42370	CG42370	NA
FBgn0038346	1623028_at	1.169	11.701	1.9e-09	1.2e-08	11.1	12.26	CG14872	CG14872	NA
FBgn0259165	1633336_at	0.528	8.327	1.9e-09	1.2e-08	8.09	8.62	CG42270	CG42270	NA
FBgn0038009	1634594_at	1.786	6.075	1.9e-09	1.1e-08	5.17	6.95	CG17738	CG17738	NA
FBgn0050035	1627582_a_at	-0.766	11.553	2e-09	1.2e-08	11.78	11.02	CG30035	CG30035	Trehalose transporter 1-1
FBgn0031327	1638892_at	1.548	8.652	2e-09	1.2e-08	8.27	9.81	CG5397	CG5397	NA
FBgn0037553	1628268_at	-1.117	7.362	2e-09	1.2e-08	7.92	6.8	CG18249	CG18249	NA
FBgn0032702	1626553_at	0.586	9.332	2e-09	1.2e-08	9.09	9.67	CG10376	CG10376	NA
FBgn0031878	1630870_s_at	-1.313	7.12	2e-09	1.2e-08	7.48	6.16	sip2	CG9188	septin interacting protein 2
FBgn0036999	1637876_a_at	0.824	7.843	2e-09	1.2e-08	7.59	8.41	CG5976	CG5976	iso Glutaminyl cyclase
FBgn0036136	1641707_at	0.694	9.618	2e-09	1.2e-08	9.37	10.07	Ufd1-like	CG6233	Ubiquitin fusion-degradation 1-like
FBgn0032283	1624069_at	0.888	8.438	2e-09	1.2e-08	8.09	8.98	CG7296	CG7296	NA
FBgn0010380	1638673_at	0.569	11.018	2.1e-09	1.2e-08	10.81	11.38	Bap	CG12532	Beta Adaptin
FBgn0034381	1636594_at	1.039	7.217	2.1e-09	1.2e-08	6.76	7.8	CG15088	CG15088	Lithium-inducible SLC6 transporter
FBgn0052649	1637405_at	0.665	8.158	2.1e-09	1.2e-08	7.94	8.61	CG32649	CG32649	NA
FBgn0015797	1629797_at	0.846	9.23	2.1e-09	1.2e-08	8.93	9.78	Rab6	CG6601	Rab-protein 6
FBgn0053087	1626279_at	-1.057	6.343	2.1e-09	1.3e-08	6.71	5.65	CG33087	CG33087	LDL receptor protein 1
FBgn0001075	1624125_at	1.826	4.902	2.1e-09	1.3e-08	4.23	6.06	ft	CG3352	fat
FBgn0050026	1631370_at	1.954	8.96	2.1e-09	1.3e-08	8.2	10.15	CG30026	CG30026	NA
FBgn0058198	1634162_at	1.668	7.81	2.1e-09	1.3e-08	7.1	8.77	CG40198	CG40198	NA
FBgn0036318	1635218_at	0.805	11.159	2.1e-09	1.3e-08	10.89	11.7	CG11009	CG11009	NA
FBgn0024326	1630916_at	1.051	9.475	2.1e-09	1.3e-08	9.08	10.13	Mkk4	CG9738	MAP kinase kinase 4
FBgn0050197	1634388_at	0.679	11.273	2.1e-09	1.3e-08	11.01	11.69	CG30197	CG30197	NA
FBgn0010905	1630417_at	-1.215	7.543	2.2e-09	1.3e-08	7.99	6.77	Spn	CG16757	Spinophilin
FBgn0033859	1629918_at	0.727	7.788	2.2e-09	1.3e-08	7.51	8.24	CG6197	CG6197	NA
FBgn0013432	1630672_at	0.729	9.271	2.2e-09	1.3e-08	9	9.73	bcn92	CG3717	bcn92
FBgn0039609	1635455_at	-1.831	4.878	2.2e-09	1.3e-08	5.67	3.84	CG14529	CG14529	NA
FBgn0003071	1634739_a_at	0.529	9.4	2.2e-09	1.3e-08	9.23	9.76	Pfk	CG4001	Phosphofructokinase
FBgn0035515	1633558_s_at	0.933	9.569	2.2e-09	1.3e-08	9.12	10.06	CG14997	CG14997	NA
FBgn0032896	1637797_at	-1.78	7.821	2.2e-09	1.3e-08	8.5	6.72	CG14400	CG14400	NA
FBgn0026666	1640339_at	0.699	8.614	2.2e-09	1.3e-08	8.39	9.09	l(1)G0136	CG8198	lethal (1) G0136
FBgn0034761	1623364_at	1.895	9.856	2.2e-09	1.3e-08	9.1	11	CG4250	CG4250	NA
FBgn0051344	1626320_at	1.362	8.611	2.2e-09	1.3e-08	8.06	9.43	CG31344	CG31344	NA
FBgn0035772	1625453_a_at	1.12	11.275	2.2e-09	1.3e-08	10.77	11.89	Sh3beta	CG8582	Sh3beta
FBgn0038243	1626908_at	1.782	6.989	2.2e-09	1.3e-08	6.14	7.92	CG8066	CG8066	NA
FBgn0004569	1641578_at	1.068	6.188	2.2e-09	1.3e-08	5.73	6.79	argos	CG4531	argos
FBgn0030073	1622908_a_at	1.329	8.439	2.3e-09	1.3e-08	8.01	9.34	CG10962	CG10962	NA
FBgn0002968	1637463_a_at	1.259	8.289	2.3e-09	1.4e-08	7.81	9.07	Nrg	CG1634	Neuroglian
FBgn0037906	1630741_s_at	1.22	9.101	2.3e-09	1.3e-08	8.63	9.85	PGRP-LB	CG14704	Peptidoglycan recognition protein LB
FBgn0028394	1626011_at	0.672	8.275	2.3e-09	1.3e-08	8.04	8.71	CG17834	CG17834	NA
FBgn0035228	1629433_at	-0.412	10.297	2.3e-09	1.4e-08	10.42	10.01	CG12091	CG12091	NA
FBgn0036448	1635842_at	1.027	10.195	2.3e-09	1.4e-08	9.8	10.83	mop	CG9311	myopic
NA	AFFX-Dros-ACTIN_3_at	2.795	11.343	2.3e-09	1.4e-08	10.01	12.81	NA	NA	NA
FBgn0033918	1638456_at	0.512	9.468	2.4e-09	1.4e-08	9.29	9.81	CG8531	CG8531	NA
FBgn0013949	1635792_a_at	-1.304	9.02	2.4e-09	1.4e-08	9.55	8.25	Ela	CG7021	Elastin-like
FBgn0033428	1627448_at	0.683	10.197	2.4e-09	1.4e-08	9.96	10.64	Updo	CG1818	Updo
FBgn0033235	1628751_at	0.721	9.12	2.4e-09	1.4e-08	8.88	9.61	CG8728	CG8728	NA
FBgn0024980	1638808_at	1.224	8.541	2.4e-09	1.4e-08	8.16	9.39	Syx4	CG2715	Syntaxin 4
FBgn0050440	1634125_at	-1.343	7.074	2.4e-09	1.4e-08	7.53	6.18	CG30440	CG30440	NA
FBgn0030653	1634351_at	-0.839	8.171	2.4e-09	1.4e-08	8.46	7.62	CG7860	CG7860	NA
FBgn0034162	1634636_at	-0.95	11.215	2.4e-09	1.4e-08	11.63	10.68	CG6426	CG6426	NA
FBgn0034225	1635447_at	-0.741	10.119	2.4e-09	1.4e-08	10.48	9.74	veil	CG4827	veil
FBgn0052099	1633677_at	0.91	7.179	2.4e-09	1.4e-08	6.92	7.83	eap	CG32099	ebony activating protein
FBgn0032124	1639990_at	1.261	7.984	2.4e-09	1.4e-08	7.5	8.77	CG17855	CG17855	NA
FBgn0038360	1632640_at	0.567	9.359	2.5e-09	1.4e-08	9.26	9.83	CG9590	CG9590	NA
FBgn0023179	1625280_at	1.566	6.336	2.5e-09	1.4e-08	5.93	7.5	amon	CG6438	amontillado
FBgn0010113	1629307_s_at	0.703	8.726	2.5e-09	1.5e-08	8.41	9.11	hdc	CG15532	headcase
FBgn0042206	1627890_at	3.644	7.405	2.5e-09	1.5e-08	6.1	9.74	GstD10	CG18548	Glutathione S transferase D10
FBgn0033139	1634977_at	0.888	11.036	2.5e-09	1.5e-08	10.69	11.58	Tsp42Er	CG12837	Tetraspanin 42Er
FBgn0032705	1632875_at	-1.36	7.156	2.5e-09	1.5e-08	7.55	6.19	Grip71	CG10346	Grip71
NA	1627236_s_at	1.655	7.124	2.5e-09	1.5e-08	6.54	8.19	NA	NA	NA
FBgn0002781	1634258_at	-0.789	7.72	2.6e-09	1.5e-08	7.94	7.15	mod(mdg4)	CG32491	modifier of mdg4
FBgn0000504	1623776_s_at	-0.954	9.073	2.6e-09	1.5e-08	9.55	8.6	dsx	CG11094	doublesex
FBgn0050085	1626755_at	-1.434	7.209	2.6e-09	1.5e-08	7.61	6.18	CG30085	CG30085	NA
FBgn0040650	1625166_at	-1.012	7.227	2.6e-09	1.5e-08	7.59	6.58	CG15456	CG15456	NA
FBgn0034523	1629879_at	0.939	5.926	2.6e-09	1.5e-08	5.54	6.48	Nnf1a	CG13434	Nnf1a
FBgn0050151	1634789_at	0.862	8.384	2.6e-09	1.5e-08	8.08	8.94	CG30151	CG30151	NA
FBgn0040290	1623031_a_at	-1.482	5.728	2.6e-09	1.5e-08	6.24	4.76	RecQ4	CG7487	RecQ4
FBgn0243505	1631568_a_at	1.122	8.494	2.6e-09	1.5e-08	8.04	9.16	sdt	CG32717	NA
FBgn0026084	1624931_at	1.605	11.429	2.7e-09	1.6e-08	10.75	12.36	cib	CG4944	ciboulot
FBgn0024804	1631030_at	0.583	10.435	2.7e-09	1.5e-08	10.2	10.79	Dbp80	CG17023	Dead box protein 80
FBgn0086448	1638256_at	0.861	7.482	2.7e-09	1.5e-08	7.07	7.93	Gpi1	CG32578	Gpi1
FBgn0031310	1629155_at	0.852	8.714	2.7e-09	1.5e-08	8.35	9.2	CG4764	CG4764	NA
FBgn0039065	1623040_at	-1.198	7.922	2.7e-09	1.5e-08	8.32	7.12	CG4449	CG4449	NA
FBgn0038147	1634960_at	1.416	10.667	2.7e-09	1.6e-08	10.25	11.66	CG14375	CG14375	CCHamide-2
FBgn0038016	1638609_s_at	0.791	8.497	2.7e-09	1.6e-08	8.2	8.99	MBD-R2	CG10042	MBD-R2
FBgn0029853	1636231_at	0.727	7.999	2.7e-09	1.6e-08	7.71	8.44	CG3781	CG3781	NA
FBgn0022981	1627830_at	-3.571	7.7	2.7e-09	1.6e-08	8.81	5.23	rpk	CG1058	ripped pocket
FBgn0034135	1639743_s_at	1.041	5.122	2.7e-09	1.6e-08	4.67	5.71	Syn2	CG4905	Syntrophin-like 2
FBgn0028954	1632821_a_at	0.552	8.68	2.7e-09	1.6e-08	8.43	8.98	CG3287	CG3287	NA
FBgn0028579	1641378_at	-0.491	8.072	2.7e-09	1.6e-08	8.21	7.72	phtf	CG3268	phtf
NA	1640472_at	0.615	11.704	2.7e-09	1.6e-08	11.46	12.07	NA	NA	NA
FBgn0037019	1640826_at	-0.524	9.505	2.8e-09	1.6e-08	9.69	9.17	CG3947	CG3947	peroxin 16
FBgn0031322	1623996_at	0.599	8.604	2.8e-09	1.6e-08	8.41	9	CG5001	CG5001	NA
FBgn0034249	1625119_at	-1.409	5.764	2.8e-09	1.6e-08	6.15	4.74	RhoGAP54D	CG6477	RhoGAP54D
FBgn0033638	1624211_at	-1.214	8.89	2.8e-09	1.6e-08	9.45	8.24	CG9005	CG9005	NA
FBgn0033926	1639180_at	1.583	12.777	2.8e-09	1.6e-08	12.16	13.74	Arc1	CG12505	Activity-regulated cytoskeleton associated protein 1
NA	1638635_at	0.634	8.179	2.8e-09	1.6e-08	7.96	8.6	NA	NA	NA
FBgn0029848	1627262_at	-1.808	5.526	2.8e-09	1.6e-08	6.35	4.54	Btd	CG3599	NA
FBgn0031523	1640529_at	-1.138	9.048	2.8e-09	1.6e-08	9.6	8.46	CG15408	CG15408	NA
NA	1626044_at	-1.183	8.518	2.8e-09	1.6e-08	8.84	7.66	NA	NA	NA
NA	1636615_at	1.081	7.327	2.8e-09	1.6e-08	6.92	8	NA	NA	NA
FBgn0001124	1631817_a_at	0.355	11.662	2.9e-09	1.6e-08	11.53	11.88	Got1	CG8430	Glutamate oxaloacetate transaminase 1
FBgn0031580	1637589_at	0.598	11.196	2.9e-09	1.6e-08	10.94	11.54	CG15423	CG15423	NA
FBgn0038303	1632765_at	0.585	7.996	2.9e-09	1.7e-08	7.78	8.36	CG6623	CG6623	Shal Interactor of Di-Leucine Motif
FBgn0003559	1628686_a_at	0.555	7.569	2.9e-09	1.7e-08	7.36	7.92	su(f)	CG17170	suppressor of forked
FBgn0004117	1641325_s_at	0.448	11.216	2.9e-09	1.7e-08	11.04	11.49	Tm2	CG4843	Tropomyosin 2
FBgn0039528	1630639_at	0.913	10.051	2.9e-09	1.7e-08	9.72	10.63	dsd	CG5634	distracted
FBgn0036020	1635293_s_at	0.562	8.785	2.9e-09	1.7e-08	8.57	9.14	CG8336	CG8336	NA
FBgn0037482	1641115_at	0.592	8.711	2.9e-09	1.7e-08	8.45	9.04	CG10055	CG10055	NA
FBgn0032467	1635208_at	0.499	8.902	2.9e-09	1.7e-08	8.73	9.23	CG9934	CG9934	NA
FBgn0030891	1633730_at	0.597	9.288	3e-09	1.7e-08	9.04	9.64	dik	CG7098	diskette
FBgn0052476	1625450_at	1.451	9.798	3e-09	1.7e-08	9.16	10.61	mthl14	CG32476	methuselah-like 14
FBgn0051953	1626850_s_at	1.076	7.243	3e-09	1.7e-08	6.85	7.92	CG31953	CG31953	NA
FBgn0003659	1634337_s_at	0.946	9.011	3e-09	1.7e-08	8.64	9.58	Sxl	CG18350	Sex lethal
FBgn0035318	1629852_at	0.839	7.87	3e-09	1.7e-08	7.53	8.37	CG9018	CG9018	NA
FBgn0035665	1626093_at	-0.47	14.195	3e-09	1.7e-08	14.34	13.88	Jon65Aiii	CG6483	Jonah 65Aiii
FBgn0035411	1626237_at	-0.854	9.383	3e-09	1.7e-08	9.61	8.76	CG12734	CG12734	Girdin
NA	1637473_s_at	0.584	8.154	3e-09	1.7e-08	7.94	8.53	NA	NA	NA
FBgn0034381	1632986_a_at	1.081	6.348	3.1e-09	1.8e-08	5.88	6.96	CG15088	CG15088	Lithium-inducible SLC6 transporter
FBgn0030025	1641703_at	0.517	8.467	3.1e-09	1.8e-08	8.27	8.78	CG2147	CG2147	NA
FBgn0050118	1641326_at	-1.033	8.965	3.1e-09	1.8e-08	9.5	8.47	CG30118	CG30118	NA
FBgn0003048	1638200_at	0.749	7.32	3.1e-09	1.8e-08	7.05	7.8	pcx	CG3443	pecanex
FBgn0030013	1628080_at	-1.394	9.705	3.1e-09	1.8e-08	10.2	8.8	GIIIspla2	CG1583	NA
FBgn0019890	1627564_s_at	0.741	9.961	3.1e-09	1.8e-08	9.66	10.4	Smg5	CG8954	Smg5
FBgn0033127	1634845_at	0.697	9.537	3.1e-09	1.8e-08	9.23	9.93	Tsp42Ef	CG12845	Tetraspanin 42Ef
FBgn0024957	1640650_at	-0.634	10.747	3.1e-09	1.8e-08	11.08	10.44	Irp-1B	CG6342	Iron regulatory protein 1B
FBgn0032499	1631738_at	0.655	7.923	3.1e-09	1.8e-08	7.69	8.34	CG6116	CG6116	NA
FBgn0001319	1639479_a_at	0.872	3.959	3.1e-09	1.8e-08	3.63	4.51	kn	CG10197	knot
FBgn0040732	1625583_at	-1.489	12.353	3.1e-09	1.8e-08	12.94	11.45	CG16926	CG16926	NA
FBgn0086758	1629484_s_at	1.875	4.759	3.2e-09	1.8e-08	4	5.88	chinmo	CG31666	Chronologically inappropriate morphogenesis
FBgn0015391	1635123_at	-1.195	7.295	3.2e-09	1.8e-08	7.63	6.43	glu	CG11397	gluon
FBgn0030326	1633607_at	-1.698	5.318	3.2e-09	1.8e-08	6.17	4.47	CG2444	CG2444	NA
FBgn0029903	1641620_s_at	1.025	8.977	3.2e-09	1.8e-08	8.5	9.53	pod1	CG4532	pod1
FBgn0031494	1634796_at	0.599	6.654	3.2e-09	1.8e-08	6.39	6.98	CG17219	CG17219	NA
FBgn0039120	1632194_at	0.808	8.296	3.2e-09	1.8e-08	7.97	8.78	Nup98	CG10198	Nucleoporin 98
FBgn0085257	1640230_at	0.679	9.481	3.2e-09	1.8e-08	9.3	9.98	CG34228	CG34228	NA
NA	1622893_at	1.204	12.344	3.2e-09	1.8e-08	11.85	13.06	NA	NA	NA
NA	1639489_at	-0.857	8.452	3.2e-09	1.8e-08	8.82	7.97	NA	NA	NA
FBgn0032693	1625114_at	1.632	5.665	3.2e-09	1.8e-08	5.09	6.72	Cyp310a1	CG10391	NA
NA	1626178_s_at	0.999	9.08	3.2e-09	1.8e-08	8.71	9.71	NA	NA	NA
FBgn0053147	1629228_at	1.705	5.224	3.3e-09	1.8e-08	4.42	6.13	Hs3st-A	CG33147	Heparan sulfate 3-O sulfotransferase-A
FBgn0020445	1628224_a_at	-1.159	7.848	3.3e-09	1.8e-08	8.18	7.02	E23	CG3327	Early gene at 23
FBgn0004103	1624023_at	0.517	11.375	3.3e-09	1.8e-08	11.17	11.69	Pp1-87B	CG5650	Protein phosphatase 1 at 87B
FBgn0000308	1640251_s_at	0.79	12.16	3.3e-09	1.8e-08	11.82	12.61	chic	CG9553	chickadee
FBgn0034628	1639943_at	-0.954	10.944	3.3e-09	1.8e-08	11.36	10.4	Acox57D-p	CG9707	acyl-Coenzyme A oxidase at 57D proximal
FBgn0013263	1628275_at	1.22	5.094	3.3e-09	1.9e-08	4.66	5.88	Trl	CG33261	Trithorax-like
FBgn0030478	1636546_s_at	-0.573	11.348	3.3e-09	1.9e-08	11.57	10.99	CG1640	CG1640	NA
FBgn0050420	1636451_a_at	1.613	5.126	3.3e-09	1.9e-08	4.57	6.18	Atf-2	CG30420	Activating transcription factor-2
FBgn0035850	1639602_s_at	0.477	10.012	3.3e-09	1.9e-08	9.82	10.3	Atg18	CG7986	Autophagy-specific gene 18
FBgn0033873	1633749_at	1.356	9.735	3.3e-09	1.8e-08	9.09	10.45	CG6337	CG6337	NA
FBgn0015550	1635026_at	1.619	5.429	3.3e-09	1.8e-08	4.87	6.49	tap	CG7659	NA
FBgn0039050	1628839_at	-1.116	6.317	3.3e-09	1.8e-08	6.68	5.57	CG17110	CG17110	NA
NA	1630309_s_at	0.645	9.67	3.3e-09	1.9e-08	9.43	10.08	NA	NA	NA
NA	1627183_at	1.753	7.965	3.3e-09	1.9e-08	7.3	9.05	NA	NA	NA
FBgn0034390	1630236_s_at	-0.79	10.646	3.4e-09	1.9e-08	10.99	10.2	CG15093	CG15093	NA
FBgn0027496	1633785_at	0.664	10.503	3.4e-09	1.9e-08	10.28	10.95	epsilonCOP	CG9543	epsilonCOP
FBgn0039737	1635589_at	-0.643	12.522	3.4e-09	1.9e-08	12.74	12.1	CG7920	CG7920	NA
FBgn0031777	1627459_at	0.645	7.237	3.4e-09	1.9e-08	7.05	7.69	CG9154	CG9154	NA
NA	1632762_s_at	0.953	7.064	3.4e-09	1.9e-08	6.79	7.74	NA	NA	NA
FBgn0039473	1634323_at	1.962	4.303	3.4e-09	1.9e-08	3.63	5.59	CG17191	CG17191	NA
FBgn0031906	1629029_at	-1.196	5.656	3.5e-09	1.9e-08	5.95	4.75	CG5160	CG5160	NA
FBgn0001961	1626492_s_at	0.997	10.904	3.5e-09	1.9e-08	10.51	11.51	Sop2	CG8978	Suppressor of profilin 2
FBgn0037515	1626272_s_at	0.601	8.628	3.5e-09	1.9e-08	8.46	9.06	Sp7	CG3066	Serine protease 7
FBgn0015589	1628548_at	1.2	10.126	3.5e-09	2e-08	9.59	10.79	Apc	CG1451	APC-like
FBgn0015477	1640001_at	0.627	8.587	3.5e-09	2e-08	8.33	8.96	Rme-8	CG8014	Receptor mediated endocytosis 8
FBgn0014930	1631313_at	0.606	10.146	3.6e-09	2e-08	9.89	10.5	CG2846	CG2846	NA
FBgn0035695	1632500_at	-1.199	5.945	3.6e-09	2e-08	6.35	5.15	CG10226	CG10226	NA
FBgn0034577	1625110_at	1.197	11.341	3.6e-09	2e-08	10.88	12.08	cpa	CG10540	capping protein alpha
FBgn0032135	1628402_a_at	0.723	8.17	3.6e-09	2e-08	7.94	8.66	GlcAT-S	CG3881	GlcAT-S
FBgn0037627	1629491_at	-0.657	7.42	3.6e-09	2e-08	7.81	7.15	CG13318	CG13318	NA
FBgn0025458	1641015_at	-1.352	6.343	3.6e-09	2e-08	6.73	5.37	BubR1	CG7838	Bub1-related kinase
FBgn0040752	1625236_s_at	0.608	9.631	3.6e-09	2e-08	9.45	10.06	Prosap	CG30483	Prosap
NA	1635548_s_at	-1.286	11.44	3.6e-09	2e-08	11.71	10.43	NA	NA	NA
FBgn0036290	1634838_at	1.61	5.528	3.7e-09	2e-08	4.99	6.6	CG10638	CG10638	NA
FBgn0036211	1635137_a_at	-0.888	10.988	3.7e-09	2e-08	11.35	10.46	CG5946	CG5946	NA
FBgn0032295	1640042_at	-1.061	8.551	3.7e-09	2e-08	8.82	7.75	CG12299	CG12299	NA
FBgn0039260	1632464_at	0.496	9.499	3.7e-09	2e-08	9.34	9.83	Smg6	CG6369	Smg6
FBgn0030246	1634316_at	0.577	8.877	3.7e-09	2e-08	8.7	9.27	CG1582	CG1582	NA
FBgn0069972	1628272_a_at	-0.928	9.357	3.7e-09	2e-08	9.72	8.79	CG40486	CG40486	NA
FBgn0038412	1637577_at	1.533	7.392	3.7e-09	2e-08	6.86	8.39	Zip3	CG6898	Zinc/iron regulated transporter-related protein 3
FBgn0038206	1627488_at	0.774	10.025	3.7e-09	2e-08	9.68	10.45	twf	CG3172	twinfilin
FBgn0038072	1627384_at	0.791	6.548	3.7e-09	2e-08	6.31	7.1	CG6225	CG6225	NA
FBgn0002526	1641324_at	1.034	8.445	3.8e-09	2.1e-08	8.04	9.07	LanA	CG10236	Laminin A
FBgn0031562	1635968_at	1.941	9.488	3.8e-09	2.1e-08	8.75	10.7	CG3604	CG3604	NA
FBgn0085256	1634525_at	1.772	9.771	3.8e-09	2.1e-08	9.23	11	CG34227	CG34227	NA
FBgn0034997	1639637_a_at	1.363	7.439	3.8e-09	2.1e-08	6.91	8.27	CG3376	CG3376	NA
FBgn0051176	1637788_at	0.938	7.036	3.8e-09	2.1e-08	6.66	7.6	CG31176	CG31176	NA
FBgn0032521	1633876_at	-1.094	6.909	3.8e-09	2.1e-08	7.16	6.07	CG7110	CG7110	NA
FBgn0026616	1632936_at	-1.662	6.068	3.8e-09	2.1e-08	6.52	4.86	alpha-Man-IIb	CG4606	alpha-Man-IIb
NA	1637542_s_at	0.85	7.152	3.8e-09	2.1e-08	6.84	7.69	NA	NA	NA
NA	1638578_at	-0.77	6.766	3.8e-09	2.1e-08	7.36	6.59	NA	NA	NA
FBgn0000318	1623936_at	0.599	11.728	3.9e-09	2.1e-08	11.54	12.14	cl	CG11024	clot
FBgn0030671	1632274_at	0.673	8.578	3.9e-09	2.1e-08	8.31	8.99	CG8134	CG8134	NA
FBgn0004925	1632197_at	0.453	10.544	3.9e-09	2.1e-08	10.39	10.84	eIF-2alpha	CG9946	NA
NA	1635927_at	0.514	7.363	3.9e-09	2.1e-08	7.23	7.75	NA	NA	NA
FBgn0033738	1631828_s_at	0.549	9.36	4e-09	2.2e-08	9.15	9.7	CG8830	CG8830	NA
FBgn0024371	1627605_at	-0.906	9.021	4e-09	2.2e-08	9.33	8.43	E2f2	CG1071	E2F transcription factor 2
FBgn0030808	1638940_at	0.863	9.025	4e-09	2.2e-08	8.69	9.55	RhoGAP15B	CG4937	RhoGAP15B
FBgn0035438	1628257_s_at	0.422	12.479	4.1e-09	2.2e-08	12.33	12.75	PHGPx	CG12013	PHGPx
FBgn0052105	1625864_at	0.94	4.133	4.1e-09	2.2e-08	3.81	4.75	CG32105	CG32105	NA
FBgn0050115	1631764_a_at	0.914	7.375	4.1e-09	2.2e-08	7.03	7.94	CG30115	CG30115	NA
FBgn0032847	1628630_at	0.548	8.335	4.1e-09	2.2e-08	8.11	8.66	Taf13	CG10756	TBP-associated factor 13
FBgn0028331	1628453_at	0.602	11.807	4.1e-09	2.2e-08	11.59	12.19	l(1)G0289	CG2221	lethal (1) G0289
FBgn0028952	1633843_at	-1.457	5.522	4.1e-09	2.2e-08	5.98	4.52	CG31672	CG31672	NA
FBgn0039043	1635175_at	0.453	8.136	4.1e-09	2.2e-08	8	8.46	CG17121	CG17121	NA
FBgn0046302	1641038_at	0.56	13.09	4.1e-09	2.2e-08	12.92	13.48	CG10650	CG10650	NA
FBgn0037786	1638253_at	1.899	7.094	4.1e-09	2.2e-08	6.44	8.34	CG5361	CG5361	NA
FBgn0030974	1630000_at	0.506	7.935	4.2e-09	2.3e-08	7.74	8.25	CG7358	CG7358	NA
FBgn0010395	1630699_at	1.561	9.294	4.2e-09	2.3e-08	8.6	10.16	betaInt-nu	CG1762	beta[nu] integrin
FBgn0033815	1628768_at	-0.933	5.801	4.2e-09	2.3e-08	6.13	5.2	CG4676	CG4676	NA
FBgn0031815	1639346_at	-0.575	9.82	4.3e-09	2.3e-08	9.96	9.38	CG9526	CG9526	farjavit
FBgn0004242	1636345_s_at	1.85	4.37	4.3e-09	2.3e-08	3.74	5.59	Syt1	CG3139	Synaptotagmin 1
FBgn0037301	1635995_a_at	0.653	7.89	4.3e-09	2.3e-08	7.64	8.3	Mms19	CG12005	Mms19
NA	1637532_s_at	0.636	10.304	4.3e-09	2.3e-08	10.14	10.77	NA	NA	NA
FBgn0030028	1641082_at	-1.646	6.955	4.4e-09	2.3e-08	7.39	5.75	Corp	CG10965	Companion of reaper
FBgn0036827	1640282_at	0.869	8.074	4.4e-09	2.3e-08	7.77	8.64	CG6843	CG6843	NA
FBgn0015829	1634616_at	0.577	8.573	4.4e-09	2.3e-08	8.36	8.94	TfIIEbeta	CG1276	Transcription factor IIEbeta
FBgn0086362	1629151_at	0.552	8.916	4.4e-09	2.3e-08	8.69	9.24	spn-F	CG12114	spn-F
FBgn0000588	1623519_at	-1.352	7.372	4.4e-09	2.4e-08	7.81	6.46	esc	CG14941	extra sexcombs
FBgn0021814	1637893_at	0.615	9.531	4.4e-09	2.4e-08	9.31	9.92	Vps28	CG12770	Vacuolar protein sorting 28
FBgn0036951	1623981_at	3.081	5.307	4.4e-09	2.4e-08	4.13	7.21	CG7017	CG7017	NA
FBgn0034579	1624228_at	0.574	8.837	4.5e-09	2.4e-08	8.61	9.19	mRpL54	CG9353	mitochondrial ribosomal protein L54
FBgn0036522	1636156_at	-1.115	7.25	4.5e-09	2.4e-08	7.5	6.38	CG7372	CG7372	NA
FBgn0030251	1632636_at	-0.854	10.242	4.5e-09	2.4e-08	10.55	9.69	CG2145	CG2145	NA
FBgn0038577	1635892_at	0.582	10.276	4.5e-09	2.4e-08	10.04	10.62	CG12321	CG12321	NA
FBgn0030791	1631655_a_at	0.849	10.215	4.5e-09	2.4e-08	9.9	10.75	CG9132	CG9132	NA
FBgn0051064	1641182_at	0.799	5.642	4.6e-09	2.4e-08	5.34	6.14	CG31064	CG31064	NA
FBgn0025725	1632109_s_at	0.749	10.272	4.6e-09	2.4e-08	10.06	10.81	alphaCop	CG7961	alpha-coatomer protein
FBgn0036787	1627007_at	-1.738	6.486	4.6e-09	2.5e-08	7.31	5.57	CG4306	CG4306	NA
FBgn0030310	1628884_at	3.221	9.815	4.6e-09	2.5e-08	8.62	11.84	PGRP-SA	CG11709	Peptidoglycan recognition protein SA
FBgn0024196	1625632_at	0.746	11.042	4.7e-09	2.5e-08	10.72	11.47	robl	CG10751	roadblock
FBgn0034176	1624905_at	0.502	9.897	4.7e-09	2.5e-08	9.72	10.22	ste24a	CG9000	prenyl protease type I
FBgn0032916	1624665_at	-0.69	7.79	4.7e-09	2.5e-08	8.02	7.33	CG9257	CG9257	NA
FBgn0027842	1626147_s_at	-1.565	11.278	4.7e-09	2.5e-08	11.65	10.09	CPTI	CG12891	NA
FBgn0040723	1634657_at	0.855	11.511	4.8e-09	2.5e-08	11.21	12.06	CG5011	CG5011	NA
FBgn0030976	1628882_at	0.515	7.938	4.8e-09	2.6e-08	7.74	8.25	CG7378	CG7378	NA
FBgn0000182	1631632_s_at	-5.048	8.576	4.8e-09	2.6e-08	10.27	5.22	BicC	CG4824	Bicaudal C
NA	1637376_at	0.911	7.075	4.8e-09	2.5e-08	6.72	7.63	NA	NA	NA
FBgn0002528	1632666_at	1.025	8.696	4.9e-09	2.6e-08	8.26	9.28	LanB2	CG3322	Laminin B2
FBgn0004888	1638529_at	-0.504	11.915	4.9e-09	2.6e-08	12.08	11.57	Scsalpha	CG1065	Succinyl coenzyme A synthetase alpha subunit
FBgn0028835	1624894_s_at	0.435	9.723	4.9e-09	2.6e-08	9.56	9.99	CSN8	CG42522	NA
NA	1635326_at	1.062	6.403	4.9e-09	2.6e-08	5.96	7.02	NA	NA	NA
FBgn0000256	1637398_a_at	-0.859	8.465	5e-09	2.6e-08	8.76	7.91	capu	CG3399	cappuccino
FBgn0000042	1626163_s_at	0.828	13.36	5e-09	2.7e-08	13.01	13.83	Act5C	CG4027	Actin 5C
FBgn0011754	1623842_a_at	0.475	10.748	5.1e-09	2.7e-08	10.62	11.09	PhKgamma	CG1830	Phosphorylase kinase gamma
FBgn0032208	1634156_at	0.705	9.918	5.1e-09	2.7e-08	9.65	10.36	CG5604	CG5604	NA
FBgn0036271	1633523_at	0.939	9.451	5.1e-09	2.7e-08	9.14	10.08	Pbgs	CG10335	Porphobilinogen synthase
FBgn0014033	1631821_at	1.925	6.539	5.1e-09	2.7e-08	5.95	7.87	Sr-CI	CG4099	Scavenger receptor class C%2C type I
FBgn0028915	1635161_at	0.989	9.086	5.1e-09	2.7e-08	8.82	9.81	CG7532	CG7532	NA
FBgn0033845	1637994_at	-1.623	6.909	5.1e-09	2.7e-08	7.36	5.74	mars	CG17064	NA
FBgn0032477	1638344_at	0.738	8.922	5.2e-09	2.7e-08	8.67	9.41	CG5287	CG5287	NA
FBgn0028543	1635283_at	-0.793	9.321	5.2e-09	2.7e-08	9.65	8.86	nimB2	CG31839	nimrod B2
FBgn0035890	1632912_s_at	0.673	7.222	5.2e-09	2.7e-08	7.01	7.68	CG13667	CG13667	NA
FBgn0027657	1626641_s_at	-0.975	11.425	5.2e-09	2.7e-08	11.8	10.82	glob1	CG9734	globin 1
FBgn0038924	1625465_a_at	0.499	11.128	5.2e-09	2.8e-08	10.83	11.33	CG6028	CG6028	NA
FBgn0010431	1629445_at	-4.998	8.556	5.2e-09	2.8e-08	10.16	5.16	mtrm	CG18543	matrimony
FBgn0000099	1624412_at	-1.18	7.095	5.3e-09	2.8e-08	7.61	6.43	ap	CG8376	apterous
FBgn0021856	1624331_at	0.38	9.352	5.3e-09	2.8e-08	9.26	9.64	l(2)k14505	CG8674	lethal (2) k14505
FBgn0015816	1636044_at	0.877	8.789	5.3e-09	2.8e-08	8.52	9.4	Slh	CG3539	SLY-1 homologous
FBgn0038173	1634216_at	0.997	6.241	5.3e-09	2.8e-08	6.12	7.12	Adgf-C	CG9345	Adenosine deaminase-related growth factor C
FBgn0040080	1639984_at	0.624	8.75	5.3e-09	2.8e-08	8.48	9.11	raps	CG5692	rapsynoid
FBgn0030695	1638119_at	0.483	9.966	5.3e-09	2.8e-08	9.86	10.34	PGRP-LE	CG8995	Peptidoglycan recognition protein LE
FBgn0011774	1640431_at	0.914	8.086	5.3e-09	2.8e-08	7.75	8.66	Irbp	CG5247	Inverted repeat-binding protein
FBgn0039656	1639907_at	1.867	5.622	5.3e-09	2.8e-08	5.05	6.91	CG11951	CG11951	NA
FBgn0243512	1631765_at	0.768	10.587	5.4e-09	2.8e-08	10.35	11.12	puc	CG7850	puckered
FBgn0001105	1627398_a_at	0.428	11.564	5.4e-09	2.8e-08	11.37	11.8	Gbeta13F	CG10545	G protein beta-subunit 13F
NA	1636968_at	0.918	4.76	5.4e-09	2.8e-08	4.4	5.32	NA	NA	NA
FBgn0004456	1640547_at	1.486	9.276	5.5e-09	2.9e-08	8.71	10.2	mew	CG1771	multiple edematous wings
FBgn0037913	1627014_a_at	-0.4	13.67	5.5e-09	2.9e-08	13.8	13.4	CG6783	CG6783	fatty acid bindin protein
FBgn0035028	1625637_at	0.524	8.992	5.5e-09	2.9e-08	8.79	9.31	Start1	CG3522	Start1
FBgn0039920	1639182_at	-1.119	5.454	5.5e-09	2.9e-08	5.84	4.72	CG11360	CG11360	NA
FBgn0003044	1623525_at	-0.875	7.959	5.6e-09	2.9e-08	8.23	7.35	Pcl	CG5109	Polycomblike
FBgn0086706	1638274_s_at	-0.677	11.247	5.6e-09	2.9e-08	11.57	10.9	pix	CG5651	pixie
FBgn0005278	1624083_s_at	-0.469	12.075	5.6e-09	2.9e-08	12.25	11.78	M(2)21AB	CG2674	S-adenosylmethionine Synthetase
FBgn0031044	1629602_at	-0.782	8.331	5.6e-09	2.9e-08	8.59	7.8	MKP-4	CG14211	MAPK Phosphatase 4
FBgn0036688	1629441_at	-1.141	6.596	5.6e-09	2.9e-08	6.94	5.8	Fit2	CG7729	Fermitin 2
FBgn0035571	1623258_at	0.921	9.185	5.6e-09	2.9e-08	8.98	9.9	CG12493	CG12493	NA
FBgn0027949	1631344_at	-1.788	8.204	5.6e-09	2.9e-08	8.71	6.93	msb1l	CG10364	msb1l
NA	1641479_at	0.902	8.776	5.6e-09	2.9e-08	8.44	9.34	NA	NA	NA
FBgn0030484	1640979_at	-1.104	11.599	5.7e-09	2.9e-08	12.02	10.91	CG1681	CG1681	NA
FBgn0024509	1637124_at	0.58	10.113	5.7e-09	2.9e-08	9.93	10.51	sec13	CG6773	sec13
FBgn0030613	1625981_at	1.743	5.242	5.7e-09	3e-08	4.58	6.33	rab3-GEF	CG5627	rab3-GEF
FBgn0032748	1628001_at	-0.855	9.127	5.7e-09	3e-08	9.39	8.54	CG10492	CG10492	NA
FBgn0033698	1636849_at	0.705	8.384	5.7e-09	3e-08	8.07	8.77	CG8858	CG8858	NA
FBgn0010851	1629352_at	0.806	11.021	5.7e-09	2.9e-08	10.5	11.31	sgl	CG10072	NA
NA	1632164_at	1.328	7.729	5.7e-09	3e-08	7.22	8.55	NA	NA	NA
FBgn0259175	1640918_at	-0.979	9.691	5.8e-09	3e-08	10.14	9.16	ome	CG42280	omega
FBgn0036773	1622937_at	0.552	7.637	5.8e-09	3e-08	7.41	7.97	CG13698	CG13698	NA
FBgn0038704	1633957_s_at	0.603	8.072	5.8e-09	3e-08	7.85	8.45	CG5316	CG5316	NA
FBgn0033212	1636989_a_at	1.036	7.332	5.8e-09	3e-08	6.91	7.95	CG1399	CG1399	NA
NA	1625880_at	0.678	7.608	5.8e-09	3e-08	7.33	8.01	NA	NA	NA
FBgn0026565	1641357_at	-1.566	10.25	5.9e-09	3e-08	10.8	9.24	CG1315	CG1315	NA
FBgn0032700	1634189_at	-0.537	7.888	5.9e-09	3e-08	8.1	7.56	CG10338	CG10338	NA
FBgn0035627	1640859_at	-1.754	6.354	5.9e-09	3e-08	6.89	5.13	Sse	CG10583	Separase
FBgn0003660	1637089_at	0.573	11.414	6e-09	3.1e-08	11.22	11.79	Syb	CG12210	Synaptobrevin
FBgn0259221	1627239_s_at	0.62	9.616	6e-09	3.1e-08	9.41	10.03	CG42321	CG42321	NA
FBgn0039697	1641659_s_at	-0.511	11.996	6e-09	3.1e-08	12.18	11.67	CG7834	CG7834	NA
FBgn0040211	1633492_at	1.445	7.629	6e-09	3.1e-08	7.21	8.65	hgo	CG4779	homogentisate 1%2C2-dioxygenase
FBgn0037135	1635907_at	-0.635	11.345	6e-09	3.1e-08	11.64	11	CG7414	CG7414	NA
FBgn0000097	1627394_s_at	0.653	9.475	6.1e-09	3.1e-08	9.21	9.86	aop	CG3166	anterior open
FBgn0052672	1639467_at	0.434	12.909	6.1e-09	3.1e-08	12.75	13.19	Atg8a	CG32672	Autophagy-specific gene 8a
FBgn0028789	1631218_at	0.757	6.124	6.1e-09	3.1e-08	5.82	6.58	Doc1	CG5133	Dorsocross1
FBgn0032402	1633227_s_at	-0.979	8.512	6.2e-09	3.2e-08	8.9	7.93	CG14945	CG14945	NA
FBgn0038463	1635487_at	-0.728	8.905	6.2e-09	3.2e-08	9.22	8.5	CG3534	CG3534	NA
FBgn0028525	1624856_at	-2.636	5.684	6.2e-09	3.2e-08	6.52	3.88	c(2)M	CG4249	crossover suppressor on 2 of Manheim
FBgn0036725	1632141_at	1.573	5.04	6.2e-09	3.2e-08	4.38	5.95	CG18265	CG18265	NA
FBgn0051326	1625598_at	-1.329	9.22	6.2e-09	3.2e-08	9.75	8.42	CG31326	CG31326	NA
FBgn0032701	1634705_at	0.586	8.105	6.3e-09	3.2e-08	7.9	8.49	CG10341	CG10341	NA
FBgn0023527	1637494_at	-0.592	8.223	6.3e-09	3.2e-08	8.41	7.81	CG3071	CG3071	NA
FBgn0022787	1627970_at	0.656	7.65	6.3e-09	3.2e-08	7.35	8.01	Hel89B	CG4261	Helicase 89B
NA	AFFX-r2-Dros-Act5C-3_s_at	0.859	13.388	6.3e-09	3.2e-08	13.02	13.88	NA	NA	NA
FBgn0004390	1629842_at	0.603	9.426	6.4e-09	3.2e-08	9.19	9.8	Gap1	CG6721	GTPase-activating protein 1
FBgn0038326	1623335_a_at	-0.616	10.576	6.4e-09	3.3e-08	10.75	10.14	CG5044	CG5044	NA
FBgn0011591	1623200_at	1.154	7.577	6.4e-09	3.3e-08	7.13	8.29	fng	CG10580	fringe
FBgn0038658	1635724_at	0.647	13.243	6.5e-09	3.3e-08	13.05	13.69	CG14292	CG14292	NA
FBgn0085446	1628465_a_at	-0.54	10.805	6.5e-09	3.3e-08	10.99	10.45	CG34417	CG34417	NA
FBgn0035313	1640810_at	0.844	4.755	6.5e-09	3.3e-08	4.46	5.31	CG13810	CG13810	NA
FBgn0052407	1637155_at	-1.309	8.351	6.6e-09	3.3e-08	9.02	7.71	CG32407	CG32407	NA
FBgn0033962	1629954_at	0.704	8.775	6.6e-09	3.4e-08	8.55	9.25	CG10153	CG10153	NA
FBgn0040212	1632807_at	0.955	10.082	6.6e-09	3.4e-08	9.71	10.66	Dhap-at	CG4625	Dihydroxyacetone phosphate acyltransferase
FBgn0015808	1630643_at	-0.73	10.128	6.6e-09	3.4e-08	10.47	9.74	ScpX	CG17320	Sterol carrier protein X-related thiolase
FBgn0034603	1626221_at	0.975	9.185	6.7e-09	3.4e-08	8.86	9.83	Glycogenin	CG9480	Glycogenin
FBgn0038893	1628796_at	0.917	6.113	6.7e-09	3.4e-08	5.79	6.7	CG6353	CG6353	NA
FBgn0033605	1623322_at	0.558	8.332	6.8e-09	3.4e-08	8.15	8.71	CG9067	CG9067	NA
FBgn0053138	1634374_at	-0.795	9.638	6.8e-09	3.4e-08	9.96	9.16	CG33138	CG33138	NA
FBgn0025687	1623787_at	0.95	7.635	6.8e-09	3.4e-08	7.31	8.26	LKR	CG7144	lysine ketoglutarate reductase
FBgn0032886	1623571_a_at	-0.711	7.153	6.8e-09	3.4e-08	7.33	6.62	CG9328	CG9328	NA
FBgn0032017	1634299_at	0.969	6.062	6.8e-09	3.4e-08	5.69	6.66	CG7810	CG7810	NA
FBgn0037288	1632923_at	-1.426	10.194	6.8e-09	3.4e-08	10.86	9.43	CG14661	CG14661	NA
FBgn0051781	1623117_at	0.567	9.436	6.8e-09	3.4e-08	9.16	9.72	CG31781	CG31781	NA
FBgn0000473	1626401_at	-1.641	10.438	6.8e-09	3.4e-08	10.95	9.31	Cyp6a2	CG9438	Cytochrome P450-6a2
FBgn0023507	1637491_s_at	-0.637	11.527	6.8e-09	3.4e-08	11.81	11.18	CG3835	CG3835	NA
FBgn0011726	1623463_at	0.63	13.557	6.8e-09	3.4e-08	13.28	13.91	tsr	CG4254	twinstar
NA	1629841_at	0.519	7.331	6.8e-09	3.4e-08	7.11	7.63	NA	NA	NA
FBgn0029745	1627401_at	0.798	4.922	6.8e-09	3.5e-08	4.66	5.46	CG6789	CG6789	NA
FBgn0030683	1637066_at	-0.744	7.045	6.9e-09	3.5e-08	7.23	6.49	CG8239	CG8239	NA
FBgn0036052	1637107_at	0.572	8.025	6.9e-09	3.5e-08	7.78	8.35	CG10809	CG10809	NA
FBgn0030479	1626413_at	0.609	6.338	7e-09	3.5e-08	6.15	6.76	Rbp1-like	CG1987	Rbp1-like
FBgn0028475	1632236_at	0.576	9.341	7e-09	3.5e-08	9.16	9.73	CG10221	CG10221	NA
NA	1624684_at	0.507	8.493	7e-09	3.5e-08	8.33	8.83	NA	NA	NA
FBgn0031865	1633268_s_at	-0.806	8.945	7.1e-09	3.6e-08	9.27	8.47	Nha1	CG10806	Na[+]/H[+] hydrogen antiporter 1
NA	1635975_s_at	0.74	7.536	7.1e-09	3.6e-08	7.29	8.03	NA	NA	NA
FBgn0002466	1637424_at	-1.324	6.783	7.2e-09	3.6e-08	7.12	5.79	sti	CG10522	sticky
FBgn0035965	1624014_at	0.511	8.051	7.2e-09	3.6e-08	7.85	8.36	Use1	CG14181	Use1
FBgn0037550	1638190_at	0.72	7.327	7.2e-09	3.6e-08	7.02	7.74	CG9667	CG9667	NA
FBgn0031910	1637095_at	2.319	10.031	7.2e-09	3.6e-08	8.91	11.23	CG15818	CG15818	NA
FBgn0037688	1629472_s_at	0.43	7.491	7.3e-09	3.7e-08	7.34	7.77	CG9356	CG9356	NA
FBgn0050187	1639516_at	1.07	4.492	7.3e-09	3.7e-08	4.09	5.16	CG30187	CG30187	NA
FBgn0017448	1638154_at	-0.688	9.366	7.4e-09	3.7e-08	9.6	8.91	CG2187	CG2187	NA
FBgn0035587	1627574_at	0.897	7.326	7.4e-09	3.7e-08	7.08	7.98	CG4623	CG4623	NA
FBgn0030010	1632913_at	-1.044	6.64	7.5e-09	3.7e-08	7	5.95	CG10959	CG10959	NA
FBgn0037743	1634528_at	0.688	8.191	7.5e-09	3.8e-08	8.06	8.74	CG8412	CG8412	NA
FBgn0030318	1623158_s_at	1.389	8.729	7.5e-09	3.8e-08	8.12	9.51	rho-4	CG1697	rhomboid-4
FBgn0034951	1640415_at	0.843	10.524	7.5e-09	3.8e-08	10.25	11.09	CG3860	CG3860	NA
NA	1626257_at	-1.537	5.388	7.6e-09	3.8e-08	5.8	4.26	NA	NA	NA
FBgn0035204	1629033_at	-0.619	8.916	7.7e-09	3.8e-08	9.15	8.54	CG2277	CG2277	NA
FBgn0015571	1625354_at	0.651	9.804	7.7e-09	3.8e-08	9.66	10.31	alpha-Est3	CG1257	alpha-Esterase-3
FBgn0034068	1639140_at	0.473	10.104	7.7e-09	3.8e-08	9.93	10.41	casp	CG8400	caspar
FBgn0030342	1635911_s_at	0.603	8.403	7.7e-09	3.8e-08	8.19	8.79	CG10347	CG10347	NA
FBgn0036563	1627771_at	3.304	8.099	7.7e-09	3.9e-08	6.52	9.83	CG13075	CG13075	NA
FBgn0034626	1639094_at	0.498	9.111	7.8e-09	3.9e-08	8.91	9.41	CG10795	CG10795	NA
FBgn0003716	1636221_a_at	0.623	10.293	7.8e-09	3.9e-08	9.98	10.6	tkv	CG14026	thickveins
FBgn0039094	1638132_at	2.182	8.236	7.8e-09	3.9e-08	7.25	9.43	CG10184	CG10184	NA
FBgn0025686	1623953_at	2.755	6.883	7.8e-09	3.9e-08	6.02	8.77	CG11592	CG11592	NA
[truncated: 7,949 more rows]

## Sheet: totalRNA_ShortLivedMutant-Drive
Ensembl.Gene.ID	ID	logFC	AveExpr	P.Value	adj.P.Val	driverControl_Mean	shortLivedMutant_Mean	symbols	FLYBASECG	Description
NA	1627886_at	4.269	11.194	7.8e-21	7.7e-17	9.84	14.11	NA	NA	NA
FBgn0004047	1631419_at	-5.551	12.341	8.6e-20	4.3e-16	14.15	8.6	Yp3	CG11129	Yolk protein 3
FBgn0003996	1624393_at	4.46	8.63	2.2e-17	6.6e-14	5.73	10.19	w	CG2759	white
FBgn0032913	1635498_at	-5.124	10.156	2.7e-17	6.6e-14	11.73	6.61	CG9259	CG9259	NA
FBgn0032144	1625948_at	-4.344	12.129	6.7e-17	1.3e-13	13.56	9.21	CG17633	CG17633	NA
FBgn0039296	1623247_at	3.532	8.945	1.3e-16	1.8e-13	7.68	11.21	CG10420	CG10420	NA
FBgn0039114	1636510_a_at	-3.968	10.931	1.3e-16	1.8e-13	12.23	8.26	Lsd-1	CG10374	Lipid storage droplet-1
FBgn0037071	1627004_at	1.511	9.224	1.9e-16	2.3e-13	8.8	10.31	CG7632	CG7632	NA
FBgn0010425	1637492_at	-5.119	12.077	2.2e-16	2.4e-13	13.76	8.64	epsilonTry	CG18681	epsilonTrypsin
FBgn0039788	1634343_at	2.869	5.519	2.4e-16	2.4e-13	4.48	7.35	Rpt6R	CG2241	NA
FBgn0037678	1627657_at	-2.655	11.562	3.8e-16	3.2e-13	12.49	9.83	CG16749	CG16749	NA
FBgn0037852	1641606_s_at	1.729	9.284	3.9e-16	3.2e-13	8.74	10.47	CG6608	CG6608	Thiamine pyrophosphate carrier protein 1
FBgn0037151	1628660_at	2.104	7.812	4.2e-16	3.2e-13	7.09	9.19	CG7130	CG7130	NA
FBgn0035781	1639641_at	-3.896	11.709	5e-16	3.3e-13	12.97	9.07	CG8560	CG8560	NA
FBgn0039325	1627144_at	-4.057	9.891	5e-16	3.3e-13	11.09	7.03	CG10560	CG10560	NA
FBgn0039313	1624892_s_at	-3.93	10.91	5.6e-16	3.5e-13	11.95	8.02	CG11892	CG11892	NA
FBgn0036738	1629476_at	-4.235	11.722	7.3e-16	4.3e-13	13.02	8.79	CG7542	CG7542	NA
FBgn0038179	1635294_at	3.058	9.243	9.2e-16	4.9e-13	8.13	11.19	CG9312	CG9312	NA
FBgn0032652	1629324_at	-4.09	8.156	9.3e-16	4.9e-13	9.54	5.45	CG6870	CG6870	NA
FBgn0034479	1625584_at	-4.228	10.445	1.1e-15	5.3e-13	11.8	7.58	CG8654	CG8654	NA
FBgn0033423	1633047_at	-4.026	9.585	1.2e-15	5.7e-13	10.88	6.86	CG1809	CG1809	NA
FBgn0033446	1634935_a_at	-3.661	11.883	1.4e-15	6.2e-13	13.13	9.47	CG1648	CG1648	NA
FBgn0261283	1628292_s_at	1.278	10.678	1.7e-15	7e-13	10.23	11.51	HLH106	CG8522	Helix loop helix protein 106
FBgn0037345	1637203_at	2.161	8.383	1.7e-15	7e-13	7.69	9.86	rev7	CG2948	rev7
FBgn0002652	1641317_at	-2.491	7.605	2e-15	7.7e-13	8.46	5.97	squ	CG4711	squash
FBgn0030080	1635287_at	2.462	6.824	2.1e-15	7.7e-13	5.83	8.3	CG15366	CG15366	NA
FBgn0039328	1638852_at	1.65	7.753	2.2e-15	7.7e-13	7.25	8.9	CHKov2	CG10675	CHKov2
FBgn0030098	1634076_at	-7.72	11.289	2.2e-15	7.7e-13	13.8	6.08	CG12057	CG12057	NA
FBgn0050022	1628558_at	2.002	10.278	2.6e-15	8.7e-13	9.56	11.56	CG30022	CG30022	NA
FBgn0038180	1624036_at	2.532	6.181	2.6e-15	8.7e-13	5.11	7.64	Cht5	CG9307	Cht5
FBgn0030594	1631420_at	-2.018	12.256	2.9e-15	9.2e-13	12.96	10.94	CG9509	CG9509	NA
FBgn0039311	1623265_at	-3.538	10.715	3.1e-15	9.2e-13	11.51	7.97	CG10513	CG10513	NA
FBgn0030614	1623482_at	3.289	4.818	3.1e-15	9.2e-13	3.77	7.05	CG9072	CG9072	NA
FBgn0259711	1632958_a_at	1.829	7.917	3.3e-15	9.6e-13	7.36	9.19	CG42365	CG42365	NA
FBgn0031547	1624817_at	3.33	7.979	3.4e-15	9.7e-13	6.72	10.05	Sr-CIV	CG3212	NA
FBgn0036126	1628683_at	1.794	9.152	3.9e-15	1.1e-12	8.59	10.39	CG6272	CG6272	NA
FBgn0036381	1641270_at	-2.905	10.582	4.1e-15	1.1e-12	11.48	8.58	CG8745	CG8745	NA
FBgn0040718	1626439_at	-3.412	8.711	4.3e-15	1.1e-12	9.83	6.42	CG15353	CG15353	NA
FBgn0033904	1633434_at	-2.135	7.704	4.6e-15	1.2e-12	8.34	6.2	CG18327	CG18327	NA
FBgn0002939	1632705_at	-4.303	8.392	5.3e-15	1.3e-12	9.46	5.15	ninaD	CG31783	neither inactivation nor afterpotential D
FBgn0038718	1627080_at	-4.385	9.871	6.1e-15	1.5e-12	11.39	7.01	CG17752	CG17752	NA
FBgn0038194	1638562_a_at	-2.154	12.25	6.5e-15	1.5e-12	13.03	10.88	Cyp6d5	CG3050	Cyp6d5
FBgn0039470	1632215_at	-6.677	7.998	6.6e-15	1.5e-12	10.56	3.89	CG6296	CG6296	NA
FBgn0039312	1638424_at	-3.679	10.841	7.5e-15	1.7e-12	11.71	8.03	CG10514	CG10514	NA
FBgn0001258	1635227_at	2.522	10.714	8.2e-15	1.8e-12	10	12.53	ImpL3	CG10160	Ecdysone-inducible gene L3
FBgn0036428	1632222_a_at	-1.889	11.869	8.3e-15	1.8e-12	12.5	10.61	CG9238	CG9238	NA
FBgn0031249	1624137_at	-3.919	12.282	8.7e-15	1.8e-12	13.55	9.63	CG11911	CG11911	NA
FBgn0035779	1630302_at	-3.067	10.833	8.7e-15	1.8e-12	11.78	8.71	CG8562	CG8562	NA
NA	AFFX-Dm-K01486-1_at	2.431	5.595	1e-14	2.1e-12	3.53	5.96	NA	NA	NA
FBgn0037391	1633771_s_at	2.281	9.765	1.2e-14	2.4e-12	9.03	11.31	CG2017	CG2017	NA
FBgn0038719	1629718_at	-3.149	7.375	1.2e-14	2.4e-12	8.54	5.39	CG16727	CG16727	NA
FBgn0085281	1627065_at	-4.402	6.643	1.5e-14	2.8e-12	8.16	3.75	CG34252	CG34252	NA
FBgn0023197	1624824_at	-4.915	12.311	1.6e-14	2.8e-12	13.94	9.03	Jon74E	CG6298	Jonah 74E
FBgn0031945	1627069_at	2.899	9.008	1.6e-14	2.8e-12	7.89	10.79	CG7191	CG7191	NA
FBgn0051205	1640666_at	4.752	6.196	1.6e-14	2.8e-12	4.49	9.24	CG31205	CG31205	NA
NA	1633401_s_at	-2.963	7.931	1.6e-14	2.8e-12	8.7	5.74	NA	NA	NA
FBgn0001180	1624490_s_at	-3.2	7.512	1.9e-14	3.2e-12	8.6	5.4	hb	CG9786	hunchback
FBgn0033979	1639381_at	-3.836	8.439	1.9e-14	3.2e-12	9.76	5.93	Cyp6a19	CG10243	Cyp6a19
FBgn0039678	1633305_at	-5.455	9.527	1.9e-14	3.2e-12	11.48	6.03	Obp99a	CG18111	Odorant-binding protein 99a
FBgn0031805	1623438_at	3.37	7.65	1.9e-14	3.2e-12	6.5	9.86	CG9505	CG9505	NA
FBgn0030817	1641207_s_at	-3.217	9.313	2e-14	3.3e-12	10.34	7.12	CG4991	CG4991	NA
FBgn0034756	1635593_at	2.528	9.156	2.1e-14	3.3e-12	8.31	10.83	Cyp6d2	CG4373	Cyp6d2
FBgn0035670	1629726_at	-2.113	12.841	2.1e-14	3.3e-12	13.49	11.38	CG10472	CG10472	NA
FBgn0259682	1640505_at	-2.909	8.515	2.5e-14	4e-12	9.45	6.54	CG42351	CG42351	NA
FBgn0001085	1639883_at	2.15	4.706	2.7e-14	4.2e-12	3.84	5.99	fz	CG17697	frizzled
FBgn0259682	1633076_at	-2.929	10.394	3e-14	4.5e-12	11.33	8.41	CG42351	CG42351	NA
NA	1635878_s_at	-3.933	12.233	3.2e-14	4.8e-12	13.56	9.63	NA	NA	NA
FBgn0039474	1636343_at	3.334	9.391	3.3e-14	4.8e-12	8.47	11.8	CG6283	CG6283	NA
FBgn0039152	1634341_a_at	-3.855	7.377	4.1e-14	5.8e-12	8.5	4.64	CG6129	CG6129	NA
FBgn0013307	1635318_at	-4.301	9.551	4.2e-14	5.8e-12	10.74	6.44	Odc1	CG8721	Ornithine decarboxylase 1
FBgn0031068	1630885_at	1.635	8.946	4.2e-14	5.8e-12	8.39	10.02	Alr	CG12534	Augmenter of liver regeneration
FBgn0020764	1632343_at	1.031	11.797	4.2e-14	5.8e-12	11.45	12.49	Alas	CG3017	Aminolevulinate synthase
FBgn0003525	1633174_at	-3.195	8.42	4.3e-14	5.8e-12	9.59	6.4	stg	CG1395	string
FBgn0015570	1633196_at	-3.742	7.942	4.7e-14	6.4e-12	9.33	5.59	alpha-Est2	CG2505	alpha-Esterase-2
FBgn0015039	1635008_at	2.217	12.13	4.9e-14	6.5e-12	11.02	13.24	Cyp9b2	CG4486	Cytochrome P450-9b2
FBgn0037230	1637385_a_at	-2.775	8.787	5e-14	6.6e-12	9.62	6.84	CG9780	CG9780	NA
FBgn0004926	1636176_at	1.07	11.655	5.1e-14	6.6e-12	11.26	12.33	eIF-2beta	CG4153	Eukaryotic initiation factor 2beta
FBgn0030864	1639349_at	-2.805	7.536	5.3e-14	6.7e-12	8.58	5.78	CG8173	CG8173	NA
FBgn0039208	1629776_a_at	1.925	9.292	5.3e-14	6.7e-12	8.61	10.54	CG6643	CG6643	NA
FBgn0029765	1626783_at	-3.123	9.749	5.6e-14	6.9e-12	10.69	7.57	CG16756	CG16756	NA
FBgn0026144	1636840_at	-3.234	7.22	5.7e-14	7e-12	8.37	5.13	CBP	CG1435	sarcoplasmic calcium-binding protein
FBgn0031267	1628514_at	2.23	10.231	5.7e-14	7e-12	9.56	11.79	Ipk2	CG13688	Ipk2
FBgn0001128	1636311_at	-1.551	12.347	5.9e-14	7e-12	12.8	11.25	Gpdh	CG9042	Glycerol 3 phosphate dehydrogenase
FBgn0039472	1629308_at	-6.841	10.076	5.9e-14	7e-12	12.17	5.33	CG17192	CG17192	NA
FBgn0036919	1628710_at	1.082	8.516	6.2e-14	7.3e-12	8.09	9.18	Grasp65	CG7809	Grasp65
FBgn0039324	1625312_at	-2.143	10.416	6.3e-14	7.3e-12	11.1	8.96	CG10553	CG10553	NA
FBgn0086699	1628830_at	1.718	6.681	6.4e-14	7.3e-12	5.98	7.7	l(3)S147910	CG14121	NA
FBgn0033672	1627697_at	1.068	8.563	6.9e-14	7.8e-12	8.18	9.25	rho-7	CG8972	rhomboid-7
FBgn0034005	1632299_at	2.904	4.971	7e-14	7.8e-12	4.06	6.96	alphaPS4	CG16827	NA
FBgn0033774	1638361_at	-7.412	11.88	7.2e-14	7.8e-12	14.31	6.9	CG12374	CG12374	NA
FBgn0038302	1628896_a_at	1.443	9.502	7.2e-14	7.8e-12	8.94	10.38	CG4210	CG4210	NA
FBgn0033477	1627152_at	2.049	10.557	7.2e-14	7.8e-12	9.82	11.87	CG12918	CG12918	NA
FBgn0030776	1625212_at	-1.475	11.498	7.6e-14	8.1e-12	11.95	10.47	CG4653	CG4653	NA
FBgn0030797	1626688_at	1.318	7.517	7.6e-14	8.1e-12	7.09	8.41	CG13004	CG13004	NA
FBgn0031305	1633826_at	-3.547	9.421	8e-14	8.3e-12	10.41	6.86	Iris	CG4715	Iris
FBgn0052483	1628500_at	-3.713	9.634	8e-14	8.3e-12	10.87	7.16	CG32483	CG32483	NA
FBgn0037011	1625315_at	1.126	10.074	8.1e-14	8.3e-12	9.69	10.82	CG4858	CG4858	NA
FBgn0035714	1626412_at	1.097	9.372	8.4e-14	8.5e-12	9.01	10.11	CG8549	CG8549	NA
FBgn0000615	1639059_s_at	-2.842	9.057	8.5e-14	8.5e-12	10	7.16	exu	CG8994	exuperantia
FBgn0037807	1625688_at	-2.265	7.849	8.5e-14	8.5e-12	8.48	6.21	CG6293	CG6293	NA
FBgn0002948	1639689_at	-2.236	7.163	9e-14	8.7e-12	7.88	5.65	nod	CG1763	no distributive disjunction
FBgn0027571	1624549_at	-1.383	13.269	9e-14	8.7e-12	13.69	12.31	CG3523	CG3523	NA
FBgn0031881	1629040_at	1.351	8.725	9.1e-14	8.7e-12	8.13	9.48	CG3476	CG3476	NA
FBgn0085360	1624599_at	-2.365	8.729	9.3e-14	8.9e-12	9.42	7.05	CG34331	CG34331	NA
FBgn0086350	1638779_at	-2.661	7.738	1e-13	9.3e-12	8.71	6.05	tef	CG8961	teflon
FBgn0034858	1637700_s_at	1.19	8.825	1e-13	9.3e-12	8.4	9.59	eIF2B-delta	CG10315	eIF2B-delta
FBgn0000404	1639195_a_at	-3.534	10.324	1e-13	9.3e-12	11.58	8.05	CycA	CG5940	Cyclin A
FBgn0036996	1636583_at	-5.701	10.656	1e-13	9.4e-12	12.42	6.72	CG5932	CG5932	NA
FBgn0036831	1625487_at	-3.317	9.238	1e-13	9.3e-12	10.19	6.87	CG6839	CG6839	NA
FBgn0034935	1628567_at	2.011	6.86	1.1e-13	9.8e-12	6.17	8.19	CG13565	CG13565	NA
NA	1631333_s_at	-1.001	13.773	1.1e-13	1e-11	14.09	13.08	NA	NA	NA
NA	1627986_s_at	-4.488	8.989	1.1e-13	9.5e-12	10.57	6.08	NA	NA	NA
FBgn0034793	1629039_at	1.298	9.164	1.2e-13	1e-11	8.7	9.99	asrij	CG13533	asrij
FBgn0036196	1640228_at	1.849	8.897	1.2e-13	1.1e-11	8.41	10.26	CG11658	CG11658	NA
FBgn0024891	1627939_a_at	1.266	9.693	1.2e-13	1.1e-11	9.24	10.51	ferrochelatase	CG2098	ferrochelatase
FBgn0001187	1630147_at	-1.83	9.383	1.3e-13	1.1e-11	10.01	8.18	Hex-C	CG8094	Hexokinase C
FBgn0005391	1623655_at	-1.98	13.537	1.3e-13	1.1e-11	14.16	12.18	Yp2	CG2979	Yolk protein 2
FBgn0011204	1633400_at	-1.081	10.478	1.4e-13	1.1e-11	10.84	9.76	cue	CG12086	cueball
FBgn0039251	1639251_at	-2.538	6.865	1.4e-13	1.1e-11	7.82	5.28	Trf4-2	CG17462	NA
FBgn0003114	1632814_at	-3.837	6.654	1.4e-13	1.1e-11	7.98	4.14	plu	CG9183	plutonium
FBgn0036024	1638413_at	-5.26	11.895	1.4e-13	1.2e-11	13.59	8.33	CG18180	CG18180	NA
FBgn0005630	1625768_s_at	-3.259	9.083	1.4e-13	1.2e-11	10.23	6.97	lola	CG12052	longitudinals lacking
FBgn0053525	1623954_s_at	-3.132	7.055	1.4e-13	1.1e-11	8.18	5.04	CoRest	CG33525	NA
FBgn0035762	1636308_at	1.221	7.72	1.5e-13	1.2e-11	7.28	8.5	CG8605	CG8605	NA
FBgn0031248	1639338_at	-4.834	9.674	1.5e-13	1.2e-11	11.32	6.49	CG11912	CG11912	NA
FBgn0032262	1624425_at	-2.294	7.765	1.5e-13	1.2e-11	8.55	6.26	CG7384	CG7384	NA
FBgn0039593	1634674_at	3.059	6.861	1.5e-13	1.2e-11	6.01	9.06	CG9989	CG9989	NA
NA	1624027_at	1.067	8.629	1.5e-13	1.2e-11	8.27	9.33	NA	NA	NA
FBgn0039326	1638226_at	1.404	11.425	1.6e-13	1.3e-11	10.82	12.23	CG10562	CG10562	NA
FBgn0025595	1635442_a_at	-2.296	9.784	1.7e-13	1.3e-11	10.46	8.16	GRHR	CG11325	Gonadotropin-releasing hormone receptor
FBgn0003067	1633599_a_at	-3.288	12.4	1.7e-13	1.3e-11	13.48	10.19	Pepck	CG17725	Phosphoenolpyruvate carboxykinase
FBgn0005670	1629875_a_at	-3.636	9.967	1.7e-13	1.3e-11	11.06	7.42	Cyp4d1	CG3656	Cytochrome P450-4d1
FBgn0020623	1632701_at	2.221	6.982	1.7e-13	1.3e-11	6.19	8.41	Pal	CG5472	NA
FBgn0013763	1641259_at	-1.258	11.384	1.8e-13	1.3e-11	11.77	10.51	Chit	CG5210	NA
FBgn0026374	1634557_at	1.837	8.235	1.8e-13	1.3e-11	7.55	9.38	Rhp	CG8497	Rhophilin
FBgn0030839	1627400_a_at	1.391	5.995	1.8e-13	1.3e-11	5.58	6.97	CG5613	CG5613	NA
FBgn0033945	1635030_at	1.935	9.723	2e-13	1.4e-11	9.29	11.22	CG12868	CG12868	NA
FBgn0017561	1635938_s_at	-2.912	8.212	2e-13	1.5e-11	9.06	6.15	Ork1	CG1615	Open rectifier K[+] channel 1
FBgn0030263	1640185_at	1.28	10.293	2.1e-13	1.5e-11	9.82	11.1	CG2076	CG2076	NA
FBgn0039205	1638216_at	1.469	9.06	2.1e-13	1.5e-11	8.51	9.98	CG13623	CG13623	NA
FBgn0030876	1641455_at	1.471	8.633	2.1e-13	1.5e-11	8.14	9.61	CG6762	CG6762	NA
NA	1639430_at	0.993	8.554	2.1e-13	1.5e-11	8.23	9.22	NA	NA	NA
FBgn0042712	1624135_at	1.182	9.4	2.2e-13	1.5e-11	9.02	10.2	HBS1	CG1898	HBS1
FBgn0016123	1636888_a_at	-1.966	10.356	2.2e-13	1.5e-11	11.06	9.09	Aph-4	CG1462	Alkaline phosphatase 4
FBgn0032049	1635453_at	-1.417	13.733	2.2e-13	1.5e-11	14.17	12.75	Bace	CG13095	beta-site APP-cleaving enzyme
FBgn0004629	1640112_at	1.274	12.261	2.3e-13	1.6e-11	11.82	13.09	Cys	CG8050	Cystatin-like
FBgn0086346	1633505_at	1.067	10.454	2.4e-13	1.6e-11	10.17	11.24	ALiX	CG12876	ALG-2 interacting protein X
FBgn0028695	1637349_at	0.894	10.057	2.4e-13	1.6e-11	9.8	10.69	Rpn1	CG7762	Rpn1
NA	1632652_s_at	2.202	9.983	2.4e-13	1.6e-11	9.18	11.38	NA	NA	NA
FBgn0037364	1635643_at	-2.922	7.226	2.5e-13	1.6e-11	8.22	5.3	Rab23	CG2108	Rab23
FBgn0052179	1628325_at	1.313	8.865	2.5e-13	1.6e-11	8.46	9.77	Krn	CG32179	Keren
FBgn0038842	1632558_at	1.344	7.602	2.5e-13	1.6e-11	7.13	8.47	CG5630	CG5630	NA
FBgn0010314	1627770_at	-2.86	7.476	2.8e-13	1.8e-11	8.51	5.65	Cks30A	CG3738	Cyclin-dependent kinase subunit 30A
FBgn0034808	1625833_at	-1.803	10.012	2.8e-13	1.8e-11	10.59	8.79	CG9896	CG9896	NA
FBgn0032900	1632212_at	1.412	8.47	3e-13	1.9e-11	7.92	9.33	CG14401	CG14401	NA
FBgn0039254	1625565_at	1.541	7.182	3e-13	1.9e-11	6.63	8.18	Nmnat	CG13645	Nicotinamide mononucleotide adenylyltransferase
FBgn0039254	1627165_a_at	1.295	6.902	3e-13	1.9e-11	6.46	7.76	Nmnat	CG13645	Nicotinamide mononucleotide adenylyltransferase
FBgn0035165	1626382_s_at	1.115	11.913	3e-13	1.9e-11	11.56	12.67	CG13887	CG13887	NA
FBgn0043783	1633684_at	-2.155	10.393	3.1e-13	1.9e-11	11	8.84	CG32444	CG32444	NA
FBgn0020369	1639784_at	0.729	11.133	3.1e-13	1.9e-11	10.9	11.63	Pros45	CG1489	Pros45
FBgn0038582	1631435_at	1.726	7.097	3.2e-13	2e-11	6.53	8.26	CG7988	CG7988	NA
FBgn0004595	1635500_a_at	2.081	7.072	3.3e-13	2e-11	6.35	8.43	pros	CG17228	prospero
FBgn0035283	1639052_a_at	-1.068	8.862	3.3e-13	2e-11	9.2	8.13	CG12024	CG12024	NA
FBgn0032184	1625802_a_at	1.873	5.32	3.3e-13	2e-11	4.69	6.56	CG13135	CG13135	NA
NA	1623357_at	0.982	7.618	3.3e-13	2e-11	7.31	8.29	NA	NA	NA
FBgn0038484	1640355_at	-4.529	11.249	3.4e-13	2e-11	12.77	8.24	CG5246	CG5246	NA
FBgn0031115	1640187_a_at	1.095	8.323	3.4e-13	2e-11	7.95	9.05	CG11710	CG11710	NA
FBgn0052259	1626328_at	3.118	5.141	3.4e-13	2e-11	4.23	7.34	CG32259	CG32259	NA
FBgn0033913	1641018_s_at	-1.334	9.925	3.5e-13	2.1e-11	10.18	8.85	CG8468	CG8468	NA
FBgn0039580	1635153_at	1.149	10.381	3.6e-13	2.1e-11	9.99	11.14	Gfat2	CG1345	Glutamine:fructose-6-phosphate aminotransferase 2
NA	1637926_s_at	1.183	9.673	3.6e-13	2.1e-11	9.27	10.46	NA	NA	NA
FBgn0028978	1629044_at	1.071	7.946	3.8e-13	2.2e-11	7.66	8.73	trbl	CG5408	tribbles
FBgn0021872	1635355_a_at	1.074	11.318	4e-13	2.3e-11	10.93	12	Xbp1	CG9415	X box binding protein-1
FBgn0028523	1635109_at	1.92	7.121	4e-13	2.3e-11	6.55	8.47	CG5888	CG5888	NA
FBgn0030676	1632707_at	1.804	7.472	4e-13	2.3e-11	6.84	8.65	CG12379	CG12379	NA
FBgn0030837	1629313_at	-1.739	12.256	4e-13	2.3e-11	12.89	11.15	CG8661	CG8661	NA
FBgn0034052	1633031_at	-3.061	8.848	4.3e-13	2.4e-11	9.6	6.54	CG8299	CG8299	NA
FBgn0039049	1623849_s_at	-1.285	11.285	4.4e-13	2.5e-11	11.7	10.42	CG6726	CG6726	NA
FBgn0015625	1626454_at	-3.643	8.359	4.6e-13	2.5e-11	9.67	6.03	CycB3	CG5814	Cyclin B3
FBgn0032374	1630140_at	-3.322	6.526	4.7e-13	2.6e-11	7.64	4.32	CG14931	CG14931	NA
FBgn0039342	1634240_at	-7.615	11.316	4.7e-13	2.6e-11	13.79	6.17	CG5107	CG5107	NA
FBgn0025381	1637328_at	0.841	10.8	4.8e-13	2.6e-11	10.54	11.38	CG14782	CG14782	NA
FBgn0032068	1625374_at	-3.659	9.018	4.8e-13	2.6e-11	9.67	6.01	CG9466	CG9466	NA
FBgn0041707	1636249_at	1.857	8.322	4.8e-13	2.6e-11	7.7	9.56	7B2	CG1168	7B2
FBgn0027521	1630343_at	-3.322	7.688	5e-13	2.7e-11	8.88	5.56	CG3679	CG3679	NA
NA	1627973_s_at	1.217	7.416	5e-13	2.7e-11	7.01	8.23	NA	NA	NA
FBgn0001218	1635423_s_at	1.544	12.562	5.1e-13	2.7e-11	12	13.54	Hsc70-3	CG4147	Heat shock protein cognate 3
FBgn0029664	1633355_at	1.374	8.196	5.2e-13	2.7e-11	7.7	9.08	CG10802	CG10802	NA
FBgn0028694	1628531_at	0.822	11.256	5.3e-13	2.8e-11	11.03	11.85	Rpn11	CG18174	Rpn11
FBgn0041094	1627101_at	1.495	11.535	5.5e-13	2.9e-11	11.18	12.67	scyl	CG7590	scylla
FBgn0031457	1630506_at	1.032	8.048	5.7e-13	3e-11	7.78	8.82	CG3077	CG3077	NA
FBgn0020414	1623643_s_at	1.332	11.351	5.8e-13	3e-11	11	12.33	Idgf3	CG4559	Imaginal disc growth factor 3
FBgn0038845	1637485_at	-1.894	10.763	5.9e-13	3.1e-11	11.38	9.49	CG10827	CG10827	NA
FBgn0259152	1623888_at	1.132	9.118	6e-13	3.1e-11	8.75	9.88	Clbn	CG11847	Caliban
NA	1626821_s_at	4.113	6.367	6.1e-13	3.1e-11	5.07	9.19	NA	NA	NA
FBgn0031814	1632361_at	-1.984	9.343	6.2e-13	3.1e-11	9.94	7.96	retm	CG9528	real-time
FBgn0014417	1634468_at	-2.235	7.269	6.3e-13	3.2e-11	8.17	5.93	CG13397	CG13397	NA
FBgn0029937	1635581_at	1.399	8.12	6.4e-13	3.2e-11	7.74	9.14	CG8300	CG8300	NA
FBgn0039254	1635881_at	1.223	8.143	6.5e-13	3.3e-11	7.72	8.94	Nmnat	CG13645	Nicotinamide mononucleotide adenylyltransferase
FBgn0030608	1637359_at	-1.527	11.07	6.8e-13	3.4e-11	11.56	10.03	Lsd-2	CG9057	Lipid storage droplet-2
FBgn0031362	1634296_s_at	-1.674	10.615	6.9e-13	3.4e-11	11.13	9.45	CG17646	CG17646	NA
FBgn0025682	1636762_a_at	2.564	9.376	6.9e-13	3.4e-11	8.42	10.98	scf	CG9148	supercoiling factor
FBgn0051233	1632461_at	-2.278	11.464	7e-13	3.4e-11	12.29	10.01	CG31233	CG31233	NA
FBgn0036689	1635468_a_at	-2.712	7.282	7e-13	3.4e-11	8.23	5.52	CG7730	CG7730	NA
FBgn0010383	1631300_at	-2.615	8.085	7.4e-13	3.6e-11	8.95	6.33	Cyp18a1	CG6816	Cytochrome P450-18a1
FBgn0037203	1630957_s_at	-2.058	9.81	7.5e-13	3.6e-11	10.25	8.19	slif	CG11128	slimfast
FBgn0030079	1631121_at	1.084	11.065	7.6e-13	3.6e-11	10.63	11.71	CG7267	CG7267	NA
NA	1631336_at	1.557	5.697	7.6e-13	3.6e-11	5.23	6.79	NA	NA	NA
FBgn0031533	1633709_at	-4.116	8.142	7.8e-13	3.7e-11	9.13	5.01	CG2772	CG2772	NA
FBgn0250820	1625250_at	1.077	10.507	7.9e-13	3.7e-11	10.12	11.19	CG5802	CG5802	NA
FBgn0030739	1623566_at	2.101	6.763	7.9e-13	3.7e-11	6.08	8.18	CG13957	CG13957	NA
NA	1631785_at	-3.663	6.636	7.9e-13	3.7e-11	7.96	4.29	NA	NA	NA
FBgn0052043	1633611_s_at	-1.713	7.23	8e-13	3.7e-11	7.88	6.16	CG32043	CG32043	NA
FBgn0011823	1637276_at	-3.042	9.52	8.1e-13	3.8e-11	10.61	7.56	Pen	CG4799	Pendulin
FBgn0028540	1632019_s_at	-1.234	9.518	8.2e-13	3.8e-11	9.99	8.75	CG9008	CG9008	NA
FBgn0037230	1633206_at	-2.834	8.647	8.3e-13	3.8e-11	9.52	6.68	CG9780	CG9780	NA
FBgn0038795	1638038_at	-1.904	8.575	8.3e-13	3.8e-11	9.14	7.24	CG4335	CG4335	NA
FBgn0031213	1634650_at	0.916	10.526	8.4e-13	3.8e-11	10.21	11.13	galectin	CG11372	galectin
NA	1625925_at	-3.125	9.691	8.5e-13	3.9e-11	10.77	7.65	NA	NA	NA
FBgn0030887	1624485_at	-1.684	7.499	8.6e-13	3.9e-11	8.02	6.34	CG6867	CG6867	NA
FBgn0037144	1639587_s_at	-1.495	7.699	8.7e-13	3.9e-11	8.09	6.59	CG7458	CG7458	NA
FBgn0038575	1627301_s_at	-4.429	6.829	8.8e-13	3.9e-11	8.32	3.89	CG7208	CG7208	NA
FBgn0000158	1634336_at	-2.852	6.224	8.8e-13	3.9e-11	7.29	4.43	bam	CG10422	bag of marbles
FBgn0031294	1637378_s_at	1.674	10.239	9e-13	4e-11	9.63	11.31	ia2	CG31795	IA-2 ortholog
FBgn0027095	1639410_at	1.654	11.168	9.2e-13	4.1e-11	10.58	12.24	Manf	CG7013	Mesencephalic astrocyte-derived neurotrophic factor
FBgn0036023	1630598_at	-4.561	9.315	9.2e-13	4.1e-11	10.39	5.83	CG18179	CG18179	NA
FBgn0036210	1629287_at	1.206	7.554	9.3e-13	4.1e-11	7.14	8.35	CG14130	CG14130	NA
FBgn0040060	1638661_at	-0.923	14.146	9.4e-13	4.1e-11	14.46	13.53	yip7	CG6457	yippee interacting protein 7
NA	1629160_s_at	0.948	9.095	9.5e-13	4.1e-11	8.75	9.69	NA	NA	NA
FBgn0040232	1624191_at	-1.85	6.548	9.6e-13	4.1e-11	7.22	5.37	cmet	CG6392	CENP-meta
FBgn0003028	1627259_a_at	-2.902	8.851	9.8e-13	4.2e-11	9.84	6.94	ovo	CG6824	ovo
FBgn0035661	1629050_at	-1.422	12.108	1e-12	4.3e-11	12.74	11.32	CG10477	CG10477	NA
FBgn0250815	1628800_at	-1.166	14.071	1e-12	4.3e-11	14.45	13.29	Jon65Aiv	CG6467	Jonah 65Aiv
FBgn0039031	1625837_at	-2.04	10.009	1.1e-12	4.5e-11	10.62	8.58	CG17244	CG17244	NA
FBgn0054026	1636470_at	-3.08	10.645	1.1e-12	4.6e-11	11.71	8.63	CG34026	CG34026	NA
FBgn0037340	1637379_at	0.773	9.499	1.1e-12	4.6e-11	9.23	10.01	CG14671	CG14671	NA
FBgn0039817	1638862_at	-1.551	5.585	1.1e-12	4.7e-11	6.11	4.56	CG15553	CG15553	NA
FBgn0035431	1634145_s_at	1.482	10.48	1.1e-12	4.7e-11	9.93	11.41	CG14968	CG14968	NA
FBgn0002183	1630638_at	1.175	6.56	1.1e-12	4.7e-11	6.22	7.39	dre4	CG1828	dre4
FBgn0036300	1636257_at	1.365	10.208	1.1e-12	4.7e-11	9.71	11.07	CG10688	CG10688	NA
FBgn0053120	1635862_at	-2.124	8.444	1.1e-12	4.7e-11	8.94	6.82	CG33120	CG33120	NA
FBgn0039006	1630802_at	2.037	9.171	1.1e-12	4.7e-11	8.42	10.46	Cyp6d4	CG12800	Cyp6d4
FBgn0032734	1623841_at	2.63	7.293	1.1e-12	4.7e-11	6.35	8.98	CG15169	CG15169	NA
FBgn0039151	1636170_at	-3.048	8.759	1.2e-12	4.9e-11	9.67	6.62	CG13607	CG13607	NA
FBgn0035484	1632688_s_at	-1.823	8.114	1.2e-12	5.1e-11	8.69	6.87	CG11594	CG11594	NA
FBgn0034184	1632187_at	1.457	8.239	1.3e-12	5.2e-11	7.81	9.27	CG9646	CG9646	NA
FBgn0037819	1635321_at	-2.227	9.12	1.3e-12	5.2e-11	9.58	7.35	CG14688	CG14688	NA
FBgn0035666	1641190_at	-3.802	11.307	1.3e-12	5.3e-11	12.52	8.71	Jon65Aii	CG6580	Jonah 65Aii
FBgn0035918	1631019_at	-1.985	7.338	1.3e-12	5.3e-11	8.09	6.11	Cdc6	CG5971	Cdc6
FBgn0028684	1629676_at	0.816	10.813	1.3e-12	5.3e-11	10.56	11.38	Tbp-1	CG10370	Tat-binding protein-1
FBgn0032799	1638217_at	0.862	10.117	1.4e-12	5.4e-11	9.82	10.68	CG10166	CG10166	NA
FBgn0027079	1638259_s_at	1.112	9.223	1.4e-12	5.4e-11	8.83	9.95	Aats-val	CG4062	Valyl-tRNA synthetase
FBgn0034403	1637617_at	-2.694	7.985	1.4e-12	5.4e-11	8.88	6.18	CG18190	CG18190	NA
FBgn0034021	1629887_at	-2.294	8.16	1.4e-12	5.4e-11	8.93	6.64	CG8180	CG8180	NA
FBgn0033724	1638959_at	1.571	5.478	1.4e-12	5.5e-11	5	6.57	CG8501	CG8501	NA
FBgn0011769	1627945_at	1.135	8.744	1.4e-12	5.5e-11	8.34	9.48	Fdxh	CG4205	Ferredoxin
FBgn0037782	1633050_at	-5.248	9.814	1.4e-12	5.5e-11	11.26	6.02	Npc2d	CG12813	Niemann-Pick type C-2d
FBgn0034849	1625490_at	1.029	8.814	1.4e-12	5.5e-11	8.47	9.5	CG3500	CG3500	NA
FBgn0030510	1637835_at	1.506	8.177	1.4e-12	5.5e-11	7.77	9.27	CG12177	CG12177	NA
FBgn0028411	1629881_at	1.207	9.958	1.5e-12	5.6e-11	9.62	10.83	Nxt1	CG12752	NTF2-related export protein 1
FBgn0041627	1625759_at	1.964	7.557	1.5e-12	5.6e-11	6.88	8.85	Ku80	CG18801	Ku80
FBgn0031114	1634714_at	1.779	8.406	1.5e-12	5.7e-11	7.83	9.61	cactin	CG1676	cactin
FBgn0003701	1634727_a_at	-2.382	6.455	1.5e-12	5.8e-11	7.33	4.95	thr	CG5785	three rows
FBgn0000140	1627383_at	-2.698	7.746	1.5e-12	5.8e-11	8.71	6.01	asp	CG6875	abnormal spindle
FBgn0036833	1629184_at	-2.102	11.358	1.5e-12	5.8e-11	11.92	9.82	CG3819	CG3819	NA
FBgn0030114	1637504_at	1.163	8.456	1.6e-12	5.8e-11	8.09	9.26	CG17754	CG17754	NA
FBgn0053208	1636412_at	-3.45	6.048	1.6e-12	6e-11	7.24	3.79	Mical	CG33208	Molecule interacting with CasL
FBgn0040606	1632984_s_at	-1.989	11.687	1.6e-12	6e-11	12.26	10.27	CG6503	CG6503	NA
FBgn0025724	1635871_at	1.049	9.921	1.6e-12	6e-11	9.54	10.59	beta'Cop	CG6699	beta'-coatomer protein
FBgn0261396	1628269_at	0.812	10.506	1.7e-12	6.1e-11	10.26	11.07	Rpn3	CG42641	Regulatory particle non-ATPase 3
FBgn0032336	1634436_at	1.706	11.493	1.7e-12	6.2e-11	10.93	12.63	Ast-C	CG14919	Allatostatin C
FBgn0038950	1637564_a_at	1.089	8.893	1.7e-12	6.3e-11	8.51	9.6	CG5382	CG5382	NA
FBgn0259715	1631604_at	-2.333	10.515	1.7e-12	6.4e-11	11.18	8.84	CG42369	CG42369	NA
FBgn0037715	1638009_s_at	-1.048	11.328	1.8e-12	6.5e-11	11.6	10.55	CG9399	CG9399	NA
FBgn0016122	1640031_at	-2.237	10.176	1.8e-12	6.6e-11	10.87	8.63	Acer	CG10593	Angiotensin-converting enzyme-related
FBgn0047351	1629331_at	3.601	5.408	1.8e-12	6.6e-11	4.28	7.88	CG31468	CG31468	NA
FBgn0032393	1640977_at	0.991	9.866	1.9e-12	6.9e-11	9.54	10.54	CG12264	CG12264	NA
FBgn0034490	1628721_at	-1.208	9.841	2e-12	7e-11	10.14	8.93	CG9864	CG9864	NA
FBgn0035996	1626220_at	2.597	7.873	2e-12	7.1e-11	7.11	9.71	CG3448	CG3448	NA
FBgn0052068	1639857_at	-0.888	11.41	2e-12	7.1e-11	11.69	10.8	CG32068	CG32068	NA
FBgn0004650	1624058_at	-3.483	6.726	2e-12	7.1e-11	7.87	4.38	fs(1)N	CG11411	female sterile (1) Nasrat
FBgn0010357	1630320_at	-2.394	13.529	2e-12	7.2e-11	14.33	11.93	betaTry	CG18211	betaTrypsin
NA	1632712_s_at	0.84	12.244	2e-12	7.1e-11	11.98	12.82	NA	NA	NA
NA	1635199_at	2.364	10.34	2e-12	7.1e-11	9.67	12.03	NA	NA	NA
FBgn0031091	1639608_at	-2.566	8.277	2.1e-12	7.3e-11	9.16	6.59	CG9576	CG9576	NA
FBgn0031836	1641169_s_at	-0.684	11.18	2.1e-12	7.4e-11	11.4	10.71	CG11050	CG11050	NA
FBgn0004795	1625481_a_at	-1.843	9.198	2.1e-12	7.4e-11	9.86	8.02	retn	CG5403	retained
FBgn0035430	1634768_at	2.394	5.634	2.1e-12	7.4e-11	4.88	7.27	CG12009	CG12009	NA
FBgn0035886	1625538_at	-3.581	10.377	2.2e-12	7.6e-11	11.35	7.77	Jon66Ci	CG7118	Jonah 66Ci
FBgn0038107	1626679_at	1.187	8.908	2.3e-12	7.9e-11	8.52	9.7	CG17327	CG17327	NA
FBgn0082585	1624510_at	1.446	5.997	2.3e-12	7.9e-11	5.47	6.91	sprt	CG30023	sprite
FBgn0029828	1623298_at	-1.698	9.885	2.3e-12	7.9e-11	10.27	8.57	CG6067	CG6067	NA
FBgn0028692	1638876_at	0.878	11.116	2.4e-12	8.3e-11	10.87	11.74	Rpn2	CG11888	Rpn2
FBgn0014462	1635738_at	1.58	5.969	2.4e-12	8e-11	5.41	6.99	Cng	CG7779	NA
FBgn0030348	1638778_at	3.176	5.76	2.5e-12	8.3e-11	4.72	7.9	CG10352	CG10352	NA
FBgn0010501	1637487_at	-1.068	7.501	2.6e-12	8.7e-11	7.87	6.8	Dcp-1	CG5370	Death caspase-1
FBgn0004378	1624620_at	-1.52	7.137	2.7e-12	8.9e-11	7.73	6.21	Klp61F	CG9191	Kinesin-like protein at 61F
FBgn0025866	1626967_at	1.441	10.378	2.7e-12	9.1e-11	9.96	11.4	CalpB	CG8107	Calpain-B
FBgn0038720	1627000_s_at	1.651	8.124	2.7e-12	9.1e-11	7.6	9.25	CG6231	CG6231	NA
FBgn0024891	1626653_a_at	1.105	9.044	2.8e-12	9.2e-11	8.65	9.76	ferrochelatase	CG2098	ferrochelatase
FBgn0033065	1634143_at	-3.279	9.942	2.8e-12	9.2e-11	11.13	7.85	Cyp6w1	CG8345	Cyp6w1
FBgn0036767	1623884_at	-4.094	9.933	2.8e-12	9.2e-11	11.76	7.66	CG16775	CG16775	NA
FBgn0040717	1624362_at	-1.723	6.751	2.9e-12	9.4e-11	7.2	5.47	Nplp4	CG15361	Neuropeptide-like precursor 4
FBgn0087021	1628463_at	-2.52	6.993	2.9e-12	9.4e-11	7.96	5.44	Spc25	CG7242	Spc25
FBgn0039471	1635868_at	-6.813	11.155	2.9e-12	9.4e-11	13.34	6.53	CG6295	CG6295	NA
FBgn0034961	1627433_at	0.953	8.908	2.9e-12	9.4e-11	8.63	9.58	CG3163	CG3163	NA
FBgn0050000	1631513_at	0.863	10.009	3e-12	9.7e-11	9.8	10.67	CG30000	CG30000	NA
NA	1631125_at	-3.839	8.895	3e-12	9.6e-11	10.25	6.41	NA	NA	NA
NA	1624571_s_at	0.887	10.046	3e-12	9.8e-11	9.71	10.6	NA	NA	NA
FBgn0027560	1639415_at	-1.587	12.185	3.1e-12	9.9e-11	12.63	11.04	Tps1	CG4104	Trehalose-6-phosphate synthase 1
FBgn0036004	1634092_at	1.299	10.345	3.1e-12	9.9e-11	9.86	11.16	Jarid2	CG3654	Jumonji%2C AT rich interactive domain 2
FBgn0035955	1629948_at	-3.265	7.193	3.1e-12	1e-10	8.34	5.08	CG5194	CG5194	NA
FBgn0031460	1635897_at	-2.429	6.728	3.1e-12	1e-10	7.26	4.83	CG15399	CG15399	NA
FBgn0050290	1625725_at	0.724	10.055	3.2e-12	1e-10	9.8	10.52	Ppcdc	CG30290	Phosphopantothenoylcysteine decarboxylase
FBgn0031497	1638642_at	0.901	10.156	3.2e-12	1e-10	9.83	10.73	CG17259	CG17259	NA
FBgn0035023	1628778_at	1.363	9.195	3.2e-12	1e-10	8.8	10.17	itp	CG13586	ion transport peptide
FBgn0086134	1635872_at	0.698	11.71	3.4e-12	1.1e-10	11.52	12.22	Pros25	CG5266	Proteasome 25kD subunit
FBgn0039212	1626506_at	1.053	8.427	3.4e-12	1.1e-10	8.05	9.11	Syx18	CG13626	Syntaxin 18
FBgn0039297	1637900_at	1.156	9.336	3.5e-12	1.1e-10	8.87	10.03	CG11852	CG11852	NA
FBgn0015038	1639495_at	1.867	8.793	3.5e-12	1.1e-10	8.06	9.93	Cyp9b1	CG4485	Cytochrome P450-9b1
FBgn0031929	1632695_at	-1.561	11.147	3.7e-12	1.1e-10	11.63	10.07	CG18585	CG18585	NA
FBgn0005695	1628210_at	-1.548	9.528	3.7e-12	1.1e-10	10.09	8.54	gcl	CG8411	germ cell-less
FBgn0033782	1624195_at	-2.557	10.048	3.7e-12	1.1e-10	10.8	8.24	sug	CG3850	sugarbabe
FBgn0025678	1626196_at	1.848	10.646	3.8e-12	1.2e-10	9.98	11.83	CaBP1	CG5809	CaBP1
FBgn0034279	1641582_at	1.911	7.932	3.8e-12	1.2e-10	7.45	9.36	CG18635	CG18635	NA
NA	1626177_s_at	1.11	10.347	3.8e-12	1.2e-10	9.98	11.09	NA	NA	NA
FBgn0020414	1626301_at	1.954	6.134	3.9e-12	1.2e-10	5.54	7.5	Idgf3	CG4559	Imaginal disc growth factor 3
FBgn0000166	1631463_a_at	-4.289	7.642	3.9e-12	1.2e-10	9.16	4.87	bcd	CG1034	bicoid
FBgn0016070	1638005_s_at	-2.875	9.675	3.9e-12	1.2e-10	10.74	7.87	smg	CG5263	smaug
FBgn0005585	1639441_at	1	11.924	3.9e-12	1.2e-10	11.54	12.54	Crc	CG9429	Calreticulin
FBgn0037996	1623398_at	-5.121	8.173	3.9e-12	1.2e-10	9.66	4.54	CG4830	CG4830	NA
FBgn0035343	1640881_at	4.242	10.617	3.9e-12	1.2e-10	9.24	13.48	CG16762	CG16762	NA
FBgn0030114	1638327_a_at	1.102	6.883	4e-12	1.2e-10	6.54	7.64	CG17754	CG17754	NA
FBgn0039487	1633778_at	-1.206	8.072	4e-12	1.2e-10	8.6	7.39	gb	CG6070	genderblind
FBgn0037551	1629715_at	0.971	9.134	4e-12	1.2e-10	8.76	9.73	Gie	CG7891	novel GTPase indispensable for equal segregation of chromosomes
FBgn0041588	1630208_at	0.81	8.126	4e-12	1.2e-10	7.84	8.65	ligatin	CG31426	ligatin
NA	AFFX-r2-Dros-GAPDH-3_at	-0.964	11.017	4e-12	1.2e-10	11.37	10.41	NA	NA	NA
FBgn0011692	1623405_at	-2.174	8.312	4.1e-12	1.2e-10	9.15	6.97	pav	CG1258	pavarotti
FBgn0035667	1636460_at	-4.037	10.731	4.1e-12	1.2e-10	12.24	8.2	Jon65Ai	CG10475	Jonah 65Ai
FBgn0014029	1626425_at	0.934	10.28	4.1e-12	1.2e-10	9.99	10.92	2002-09-01	CG4173	Septin-2
FBgn0038252	1639853_at	-4.647	7.938	4.2e-12	1.2e-10	9.56	4.92	CG3509	CG3509	NA
FBgn0025620	1641711_at	-3.161	8.713	4.2e-12	1.2e-10	9.49	6.33	CG13360	CG13360	NA
NA	1627055_at	2.238	6.548	4.2e-12	1.2e-10	5.88	8.12	NA	NA	NA
FBgn0037684	1637971_a_at	-3.863	9.387	4.3e-12	1.2e-10	10.67	6.8	CG8129	CG8129	NA
FBgn0032105	1634359_a_at	-2.675	8.449	4.3e-12	1.2e-10	9.44	6.77	borr	CG4454	borealin-related
FBgn0000405	1639876_a_at	-3.492	10.855	4.4e-12	1.3e-10	12.09	8.59	CycB	CG3510	Cyclin B
FBgn0003358	1624092_at	-5.242	8.724	4.4e-12	1.3e-10	10.58	5.34	Jon99Ci	CG31039	Jonah 99Ci
FBgn0015575	1637255_a_at	-1.421	10.643	4.4e-12	1.3e-10	11.02	9.6	alpha-Est7	CG1112	alpha-Esterase-7
FBgn0038820	1622974_at	1.563	8.635	4.4e-12	1.3e-10	8.16	9.72	CG4000	CG4000	NA
FBgn0039294	1639044_at	4.308	5.571	4.4e-12	1.3e-10	4.27	8.58	Cad96Cb	CG13664	NA
FBgn0004635	1635462_at	3.849	7.318	4.5e-12	1.3e-10	6.29	10.14	rho	CG1004	rhomboid
FBgn0040347	1632240_at	-2.063	7.367	4.5e-12	1.3e-10	8.11	6.05	mus81	CG3026	mus81
FBgn0010424	1631217_a_at	1.18	9.034	4.6e-12	1.3e-10	8.68	9.86	TpnC73F	CG7930	Troponin C at 73F
FBgn0026080	1635824_at	0.78	8.268	4.6e-12	1.3e-10	8.05	8.83	Tip60	CG6121	Tip60
FBgn0004419	1628017_a_at	-1.685	11.357	4.6e-12	1.3e-10	11.97	10.29	me31B	CG4916	maternal expression at 31B
FBgn0010039	1635701_at	1.615	8.321	4.7e-12	1.3e-10	7.81	9.43	GstD3	CG4381	Glutathione S transferase D3
FBgn0035619	1636287_at	-4.241	10.837	4.7e-12	1.3e-10	12.04	7.8	CG10592	CG10592	NA
FBgn0035090	1638481_at	-2.743	9.488	4.7e-12	1.3e-10	10.29	7.55	CG2736	CG2736	NA
FBgn0033226	1638693_s_at	1.024	11.454	4.7e-12	1.3e-10	11.06	12.09	CG1882	CG1882	NA
FBgn0035620	1637660_at	-4.026	10.422	4.7e-12	1.3e-10	11.51	7.49	CG5150	CG5150	NA
FBgn0035969	1628655_at	-4.181	6.677	4.8e-12	1.3e-10	8.1	3.92	CG4476	CG4476	NA
FBgn0000351	1632624_at	-2.417	6.683	4.8e-12	1.3e-10	7.46	5.04	cort	CG11330	cortex
FBgn0063494	1625744_at	1.384	11.035	4.8e-12	1.3e-10	10.54	11.92	GstE6	CG17530	Glutathione S transferase E6
FBgn0037934	1624692_at	1.214	11.107	4.8e-12	1.3e-10	10.35	11.56	CG6830	CG6830	NA
FBgn0004400	1625083_at	-3.022	5.949	5e-12	1.3e-10	7.04	4.01	rhi	CG10683	rhino
FBgn0042119	1631017_at	-1.401	9.711	5e-12	1.4e-10	10.19	8.79	Cpr65Au	CG18778	Cuticular protein 65Au
FBgn0019686	1625038_s_at	-3.045	8.962	5.1e-12	1.4e-10	10.02	6.97	lok	CG10895	loki
FBgn0032194	1624141_at	1.233	8.833	5.1e-12	1.4e-10	8.44	9.68	CG4901	CG4901	NA
FBgn0038099	1638935_at	-2.064	7.363	5.1e-12	1.4e-10	8.04	5.98	CG7091	CG7091	NA
FBgn0032596	1626782_at	0.764	11.723	5.1e-12	1.4e-10	11.53	12.29	CG17331	CG17331	NA
FBgn0033886	1629266_s_at	0.712	10.992	5.2e-12	1.4e-10	10.76	11.47	CG13349	CG13349	NA
FBgn0037470	1630469_a_at	0.814	9.295	5.2e-12	1.4e-10	9.07	9.88	CG1091	CG1091	NA
FBgn0031520	1626081_at	2.482	7.591	5.2e-12	1.4e-10	6.36	8.84	CG8837	CG8837	NA
FBgn0013732	1633243_at	-2.078	6.95	5.3e-12	1.4e-10	7.75	5.67	sced	CG3273	scrambled
FBgn0024996	1630395_at	0.838	8.71	5.4e-12	1.4e-10	8.42	9.26	eIF2B-beta	CG2677	eIF2B-beta
FBgn0039755	1638528_at	-0.865	10.881	5.4e-12	1.4e-10	11.2	10.33	CG15531	CG15531	NA
FBgn0038173	1634216_at	1.64	6.241	5.4e-12	1.4e-10	5.48	7.12	Adgf-C	CG9345	Adenosine deaminase-related growth factor C
FBgn0005638	1641677_at	2.517	5.351	5.4e-12	1.4e-10	4.53	7.04	slbo	CG4354	slow border cells
NA	1624437_s_at	-3.51	12.284	5.4e-12	1.4e-10	13.51	10	NA	NA	NA
FBgn0038938	1630335_s_at	-2.076	9.039	5.5e-12	1.4e-10	9.64	7.56	CG7084	CG7084	NA
FBgn0086711	1633290_a_at	-2.279	6.977	5.5e-12	1.4e-10	7.84	5.56	mol	CG4482	moladietz
FBgn0038039	1623448_at	1.111	9.503	5.5e-12	1.4e-10	9.07	10.18	CG5196	CG5196	NA
FBgn0028992	1631226_at	0.695	9.759	5.6e-12	1.5e-10	9.56	10.25	sds22	CG5851	sds22
FBgn0032219	1627658_s_at	-2.14	7.358	5.7e-12	1.5e-10	8.01	5.87	CG4995	CG4995	NA
FBgn0040623	1632479_at	0.91	10.705	5.8e-12	1.5e-10	10.41	11.32	Spase12	CG11500	Spase 12-subunit
FBgn0010803	1638511_at	0.776	10.004	5.8e-12	1.5e-10	9.71	10.49	Aats-trp	CG9735	Tryptophanyl-tRNA synthetase
FBgn0040102	1630256_at	1.548	6.698	5.9e-12	1.5e-10	6.13	7.68	lectin-24Db	CG2958	lectin-24Db
FBgn0033366	1641280_at	-4.268	7.783	5.9e-12	1.5e-10	8.97	4.7	Ance-4	CG8196	Ance-4
NA	1638457_at	-0.967	9.027	5.9e-12	1.5e-10	9.39	8.43	NA	NA	NA
FBgn0004045	1629545_at	-0.789	14.207	6e-12	1.5e-10	14.45	13.66	Yp1	CG2985	Yolk protein 1
FBgn0069242	1629234_at	0.72	11.247	6.1e-12	1.5e-10	10.96	11.68	eca	CG33104	eclair
NA	1641367_at	1.331	9.682	6.1e-12	1.6e-10	9.12	10.45	NA	NA	NA
FBgn0020906	1627869_at	-4.491	11.345	6.2e-12	1.6e-10	12.82	8.33	Jon25Bi	CG8867	Jonah 25Bi
FBgn0035933	1629955_at	-1.869	10.1	6.2e-12	1.6e-10	10.78	8.92	CG13309	CG13309	NA
FBgn0032820	1641066_s_at	-1.837	10.695	6.2e-12	1.6e-10	11.25	9.41	fbp	CG31692	fructose-1%2C6-bisphosphatase
FBgn0040236	1639771_at	1.685	9.516	6.3e-12	1.6e-10	8.99	10.67	c11.1	CG12132	c11.1
FBgn0087040	1630239_at	-4.731	8.457	6.3e-12	1.6e-10	10.06	5.33	alphaTub67C	CG8308	alpha-Tubulin at 67C
NA	1638377_x_at	-3.335	12.451	6.3e-12	1.6e-10	13.61	10.28	NA	NA	NA
NA	1640801_at	-1.145	9.77	6.3e-12	1.6e-10	10.12	8.97	NA	NA	NA
NA	1627525_a_at	1.322	9.597	6.3e-12	1.6e-10	9.18	10.5	NA	NA	NA
FBgn0030710	1636096_at	-2.211	6.77	6.4e-12	1.6e-10	7.61	5.39	CG8924	CG8924	NA
NA	1630614_s_at	3.964	7.612	6.5e-12	1.6e-10	5.54	9.5	NA	NA	NA
FBgn0051694	1637307_at	0.715	10.317	6.6e-12	1.6e-10	10.13	10.84	CG31694	CG31694	NA
FBgn0030928	1631801_at	-2.657	9.254	6.6e-12	1.6e-10	10.41	7.75	CG15044	CG15044	NA
NA	1630842_s_at	0.775	10.185	6.6e-12	1.6e-10	9.97	10.74	NA	NA	NA
FBgn0033129	1641508_s_at	1.293	7.629	6.8e-12	1.7e-10	7.15	8.45	Tsp42Eh	CG12844	Tetraspanin 42Eh
FBgn0033431	1637955_a_at	0.864	8.813	6.8e-12	1.7e-10	8.51	9.38	CG1827	CG1827	NA
FBgn0024992	1626460_at	0.865	8.876	6.8e-12	1.7e-10	8.57	9.44	CG2658	CG2658	NA
FBgn0037609	1635637_at	1.072	8.966	6.8e-12	1.7e-10	8.67	9.75	CG9773	CG9773	NA
FBgn0023395	1630786_at	-2.49	6.968	6.8e-12	1.7e-10	7.87	5.38	Chd3	CG9594	Chd3
NA	1633491_s_at	0.74	8.205	6.8e-12	1.7e-10	7.97	8.71	NA	NA	NA
FBgn0052027	1633520_at	-2.702	6.573	6.9e-12	1.7e-10	7.58	4.88	CG32027	CG32027	NA
FBgn0034098	1636625_at	-3.446	6.789	6.9e-12	1.7e-10	7.96	4.52	krimp	CG15707	krimper
NA	1623300_at	-2.957	5.337	6.9e-12	1.7e-10	6.42	3.47	NA	NA	NA
FBgn0038390	1638806_at	-2.266	6.723	7e-12	1.7e-10	7.54	5.27	Rbf2	CG5083	Retinoblastoma-family protein 2
FBgn0032726	1626086_at	-2.186	9.101	7.1e-12	1.7e-10	9.81	7.62	CG10621	CG10621	NA
FBgn0033853	1640429_a_at	-1.011	11.701	7.1e-12	1.7e-10	12.04	11.03	CG6145	CG6145	NA
FBgn0033635	1630030_at	-3.183	6.777	7.1e-12	1.7e-10	7.84	4.66	CG7777	CG7777	NA
FBgn0040070	1629426_s_at	0.849	12.231	7.1e-12	1.7e-10	11.95	12.8	Trx-2	CG31884	thioredoxin-2
FBgn0039972	1623825_s_at	-5.1	8.586	7.1e-12	1.7e-10	10.35	5.25	CG17018	CG17018	NA
FBgn0038818	1628288_s_at	2.428	6.3	7.1e-12	1.7e-10	5.54	7.96	Nep4	CG4058	Neprilysin 4
FBgn0052541	1639917_at	-1.261	6.126	7.1e-12	1.7e-10	6.61	5.35	CG32541	CG32541	NA
FBgn0003733	1638587_at	-2.258	6.859	7.2e-12	1.7e-10	7.66	5.41	tor	CG1389	torso
FBgn0023515	1630316_a_at	-3.431	7.342	7.2e-12	1.7e-10	8.54	5.11	CG14814	CG14814	NA
FBgn0051343	1626832_at	-1.161	12.484	7.2e-12	1.7e-10	12.83	11.67	CG31343	CG31343	NA
NA	1633036_s_at	1	10.42	7.2e-12	1.7e-10	9.78	10.78	NA	NA	NA
FBgn0037146	1637154_at	-1.693	11.157	7.4e-12	1.7e-10	11.64	9.95	CG7470	CG7470	NA
FBgn0033764	1632530_s_at	-1.3	9.659	7.4e-12	1.7e-10	10.04	8.74	CG8776	CG8776	NA
FBgn0033401	1631304_a_at	0.94	8.85	7.6e-12	1.8e-10	8.49	9.43	CG1968	CG1968	NA
FBgn0039527	1630064_at	1.189	7.173	7.6e-12	1.8e-10	6.82	8	CG5639	CG5639	NA
FBgn0012037	1632431_s_at	-0.98	11.535	7.7e-12	1.8e-10	11.84	10.86	Ance	CG8827	Angiotensin converting enzyme
FBgn0037976	1633651_at	1.882	9.421	7.7e-12	1.8e-10	8.75	10.63	Tk	CG14734	Tachykinin
FBgn0035830	1625389_at	0.963	8.975	7.7e-12	1.8e-10	8.65	9.61	CG8209	CG8209	NA
FBgn0038660	1639834_at	1.894	5.468	7.8e-12	1.8e-10	4.87	6.77	CG14291	CG14291	NA
FBgn0035656	1640221_at	-1.163	8.347	7.9e-12	1.8e-10	8.77	7.61	CG10479	CG10479	NA
FBgn0036545	1625027_a_at	1.312	8.729	7.9e-12	1.8e-10	8.29	9.6	GXIVsPLA2	CG17035	GXIVsPLA2
FBgn0259791	1638411_at	-2.54	6.413	7.9e-12	1.8e-10	7.34	4.8	bora	CG6897	aurora borealis
FBgn0035186	1623126_at	-2.574	9.684	7.9e-12	1.8e-10	10.34	7.77	CG13912	CG13912	NA
NA	1628589_at	0.718	12.398	8e-12	1.8e-10	12.16	12.88	NA	NA	NA
FBgn0035959	1636238_at	-2.586	7.403	8.2e-12	1.9e-10	8.36	5.78	CG4911	CG4911	NA
FBgn0031930	1635065_at	-3.89	8.745	8.2e-12	1.9e-10	9.84	5.95	CG7025	CG7025	NA
FBgn0023529	1628194_at	1.044	10.992	8.3e-12	1.9e-10	10.58	11.62	CG2918	CG2918	NA
FBgn0032216	1631050_at	0.749	11.195	8.3e-12	1.9e-10	10.99	11.74	CG5384	CG5384	NA
FBgn0015553	1631396_at	-3.146	6.812	8.6e-12	1.9e-10	7.93	4.78	tos	CG10387	tosca
FBgn0030509	1641715_at	-2.752	7.077	8.6e-12	1.9e-10	7.77	5.02	CG11162	CG11162	NA
NA	1625007_a_at	1.944	5.13	8.6e-12	1.9e-10	4.46	6.4	NA	NA	NA
FBgn0003124	1636189_at	-2.351	8.516	8.7e-12	1.9e-10	9.38	7.03	polo	CG12306	polo
FBgn0033216	1625129_at	-3.686	7.731	8.9e-12	2e-10	8.86	5.17	CG1946	CG1946	NA
FBgn0011828	1640097_at	1.003	7.732	9e-12	2e-10	7.38	8.38	Pxn	CG12002	Peroxidasin
FBgn0002069	1629026_at	1.217	11.998	9.3e-12	2.1e-10	11.56	12.78	Aats-asp	CG3821	Aspartyl-tRNA synthetase
FBgn0040477	1625258_at	-2.887	6.131	9.5e-12	2.1e-10	7.15	4.27	cid	CG13329	centromere identifier
FBgn0031417	1628013_at	-1.937	8.87	9.6e-12	2.1e-10	9.3	7.36	CG3597	CG3597	NA
NA	1628731_s_at	-3.212	7.264	9.6e-12	2.1e-10	8.34	5.13	NA	NA	NA
FBgn0003655	1633458_at	-3.801	7.754	9.8e-12	2.1e-10	9.11	5.31	swa	CG3429	swallow
FBgn0015565	1634074_a_at	-2.654	9.163	9.9e-12	2.2e-10	10.09	7.43	yin	CG2913	yin
NA	1636305_a_at	1.091	9.277	9.9e-12	2.2e-10	8.92	10.01	NA	NA	NA
FBgn0004873	1634736_at	-3.004	7.064	1e-11	2.2e-10	8.1	5.09	hts	CG9325	hu li tai shao
FBgn0030242	1632732_at	-2.108	6.85	1e-11	2.3e-10	7.57	5.46	sofe	CG1655	sister of feo
FBgn0010316	1625199_s_at	-1.699	8.807	1.1e-11	2.3e-10	9.38	7.68	dap	CG1772	dacapo
FBgn0031540	1639821_at	-1.712	7.378	1.1e-11	2.4e-10	8.05	6.34	CG3238	CG3238	NA
FBgn0030241	1637475_at	-2.31	8.376	1.1e-11	2.4e-10	9.22	6.91	feo	CG11207	fascetto
FBgn0037844	1637691_at	-3.708	7.864	1.1e-11	2.4e-10	9.2	5.49	CG4570	CG4570	NA
FBgn0035871	1622979_a_at	1.206	12.025	1.1e-11	2.5e-10	11.63	12.83	CG7188	CG7188	NA
FBgn0085275	1638637_at	1.046	7.441	1.1e-11	2.5e-10	7.12	8.16	CG34246	CG34246	NA
FBgn0003046	1623092_at	-2.601	7.795	1.1e-11	2.3e-10	8.44	5.84	Pcp	CG3440	NA
FBgn0001128	1625949_at	-0.954	11.05	1.2e-11	2.6e-10	11.41	10.45	Gpdh	CG9042	Glycerol 3 phosphate dehydrogenase
FBgn0035346	1637605_s_at	1.285	9.319	1.2e-11	2.5e-10	8.94	10.22	CG1146	CG1146	NA
FBgn0031434	1624375_at	-2.006	7.487	1.2e-11	2.5e-10	8.25	6.25	CG3227	CG3227	NA
FBgn0032929	1638868_at	-2.02	7.525	1.2e-11	2.5e-10	8.31	6.29	Mcm10	CG9241	Sensitized chromosome inheritance modifier 19
FBgn0052177	1636837_at	1.043	9.457	1.2e-11	2.5e-10	9.1	10.14	CG32177	CG32177	NA
FBgn0086251	1626892_at	-1.692	8.148	1.2e-11	2.5e-10	8.77	7.08	del	CG9252	deadlock
FBgn0038360	1632640_at	0.833	9.359	1.2e-11	2.6e-10	8.99	9.83	CG9590	CG9590	NA
FBgn0037490	1628507_at	1.048	6.459	1.2e-11	2.6e-10	6.1	7.15	CG10053	CG10053	NA
FBgn0034401	1630677_at	0.934	9.929	1.2e-11	2.6e-10	9.66	10.6	CG15100	CG15100	NA
NA	AFFX-r2-Dros-GAPDH-M_a_at	-1.473	10.966	1.2e-11	2.5e-10	11.4	9.93	NA	NA	NA
FBgn0010383	1641022_a_at	-2.211	7.371	1.3e-11	2.6e-10	8.1	5.89	Cyp18a1	CG6816	Cytochrome P450-18a1
FBgn0040532	1623342_at	1.448	10.71	1.3e-11	2.6e-10	10.29	11.74	CG8369	CG8369	NA
FBgn0003863	1638196_at	-0.775	14.018	1.3e-11	2.7e-10	14.27	13.5	alphaTry	CG18444	alphaTrypsin
FBgn0014031	1637872_at	-1.354	10.151	1.3e-11	2.7e-10	10.52	9.16	Spat	CG3926	Serine pyruvate aminotransferase
FBgn0033915	1628969_s_at	-0.843	9.196	1.3e-11	2.7e-10	9.5	8.66	CG8485	CG8485	NA
FBgn0036548	1625343_at	0.885	9.336	1.3e-11	2.7e-10	9.02	9.91	CG5931	CG5931	NA
FBgn0032149	1625836_at	0.886	8.25	1.3e-11	2.7e-10	7.95	8.84	CG4036	CG4036	NA
FBgn0039562	1636528_at	1.659	11.032	1.3e-11	2.7e-10	10.38	12.04	Gp93	CG5520	Glycoprotein 93
FBgn0031633	1635482_at	1.104	9.413	1.3e-11	2.7e-10	9.09	10.2	CG2976	CG2976	NA
FBgn0031464	1636572_at	-2.027	6.683	1.3e-11	2.8e-10	7.35	5.32	Duox	CG3131	Dual oxidase
FBgn0030878	1632374_at	0.882	9.227	1.3e-11	2.8e-10	8.96	9.84	CG6769	CG6769	NA
NA	1623268_a_at	1.122	8.154	1.3e-11	2.7e-10	7.76	8.89	NA	NA	NA
FBgn0021765	1634433_at	-0.81	11.986	1.4e-11	2.8e-10	12.22	11.41	scu	CG7113	scully
FBgn0000114	1625076_at	-2.678	10.109	1.4e-11	2.8e-10	11.06	8.38	aret	CG31762	arrest
FBgn0035267	1623287_at	-2.264	6.382	1.4e-11	2.8e-10	7.22	4.96	CG13921	CG13921	NA
FBgn0003087	1634209_at	-3.73	8.764	1.4e-11	2.8e-10	10.13	6.4	pim	CG5052	pimples
FBgn0051314	1627649_at	1.135	3.816	1.4e-11	2.8e-10	3.47	4.6	Neu3	CG7649	Neu3
FBgn0027506	1638875_at	-1.138	9.046	1.4e-11	2.8e-10	9.47	8.33	EDTP	CG6542	Egg-derived tyrosine phosphatase
FBgn0024973	1626169_at	0.924	8.435	1.4e-11	2.8e-10	8.13	9.05	CG2701	CG2701	NA
FBgn0025454	1625697_at	-0.923	13.471	1.4e-11	2.8e-10	13.82	12.9	Cyp6g1	CG8453	Cyp6g1
FBgn0052625	1623296_at	-2.446	7.298	1.4e-11	2.9e-10	8.24	5.79	CG32625	CG32625	NA
FBgn0026257	1638204_s_at	-2.09	7.358	1.4e-11	2.9e-10	8.14	6.05	cav	CG6219	caravaggio
NA	1631367_at	0.864	7.686	1.4e-11	2.9e-10	7.43	8.29	NA	NA	NA
FBgn0051678	1640130_at	1.138	9.439	1.5e-11	2.9e-10	9.06	10.2	CG31678	CG31678	NA
FBgn0026582	1638938_at	0.939	8.105	1.5e-11	2.9e-10	7.85	8.79	CG9418	CG9418	NA
FBgn0031538	1637422_at	-1.44	10.054	1.5e-11	3e-10	10.41	8.97	CG3246	CG3246	NA
FBgn0035641	1623330_at	-3.094	6.143	1.5e-11	3e-10	7.16	4.07	CG5568	CG5568	NA
FBgn0052195	1640590_at	1.235	9.076	1.5e-11	3.1e-10	8.58	9.81	CG32195	CG32195	NA
FBgn0031435	1626264_at	-2.525	7.522	1.5e-11	2.9e-10	8.48	5.95	CG9883	CG9883	NA
FBgn0037646	1633770_at	-1.581	8.937	1.6e-11	3.1e-10	9.42	7.84	CG11967	CG11967	Carbonic anhydrase beta
FBgn0039350	1641031_s_at	-1.781	8.359	1.6e-11	3.1e-10	9	7.22	jigr1	CG17383	jing interacting gene regulatory 1
FBgn0031860	1626613_at	-1.98	7.444	1.6e-11	3.1e-10	7.84	5.86	CG11236	CG11236	NA
FBgn0029733	1637003_at	-3.445	7.001	1.6e-11	3.2e-10	8.18	4.73	CG6927	CG6927	NA
FBgn0051390	1630318_at	1.024	8.45	1.6e-11	3.2e-10	8.19	9.22	MED7	CG31390	Mediator complex subunit 7
FBgn0030006	1628706_at	1.125	7.924	1.6e-11	3.2e-10	7.65	8.77	CG17982	CG17982	NA
FBgn0035663	1629860_at	-1.712	5.629	1.6e-11	3.2e-10	6.12	4.41	CG6462	CG6462	NA
NA	AFFX-r2-Dros-GAPDH-3_a_at	-1.075	12.285	1.6e-11	3.1e-10	12.62	11.54	NA	NA	NA
NA	1634450_a_at	1.766	6.287	1.6e-11	3.2e-10	5.87	7.64	NA	NA	NA
FBgn0023214	1630707_at	1.601	8.368	1.7e-11	3.2e-10	7.91	9.52	edl	CG15085	ETS-domain lacking
FBgn0030805	1623472_at	-2.022	6.52	1.7e-11	3.2e-10	7.22	5.2	wus	CG9089	wurst
FBgn0028552	1632605_at	1.567	9.363	1.7e-11	3.2e-10	8.89	10.46	gammaSnap	CG3988	gamma-soluble NSF attachment protein
FBgn0024150	1628412_at	2.139	7.686	1.7e-11	3.2e-10	7.05	9.19	Ac78C	CG10564	Adenylyl cyclase 78C
FBgn0036053	1636791_s_at	1.018	10.085	1.7e-11	3.3e-10	9.78	10.8	iPLA2-VIA	CG6718	calcium-independent phospholipase A2 VIA
FBgn0039449	1626997_at	-1.902	5.601	1.7e-11	3.3e-10	6.28	4.38	CG6425	CG6425	NA
FBgn0040985	1624583_at	0.645	11.908	1.8e-11	3.4e-10	11.73	12.38	CG6115	CG6115	NA
FBgn0030073	1628935_at	1.722	7.871	1.8e-11	3.4e-10	7.27	8.99	CG10962	CG10962	NA
FBgn0039741	1631054_s_at	-0.928	9.379	1.8e-11	3.5e-10	9.66	8.74	CG7943	CG7943	NA
FBgn0011754	1624139_at	0.633	10.631	1.8e-11	3.5e-10	10.4	11.03	PhKgamma	CG1830	Phosphorylase kinase gamma
FBgn0029924	1640002_at	-2.211	6.469	1.8e-11	3.5e-10	7.25	5.04	CG4586	CG4586	NA
FBgn0016684	1623035_at	-1.574	6.977	1.9e-11	3.5e-10	7.46	5.88	NaPi-T	CG10207	Na[+]-dependent inorganic phosphate cotransporter
FBgn0028686	1637341_at	0.747	11.106	1.9e-11	3.5e-10	10.9	11.65	Rpt3	CG16916	Rpt3
FBgn0026576	1629153_s_at	-1.707	9.62	1.9e-11	3.5e-10	9.98	8.27	CG5991	CG5991	NA
FBgn0000567	1634440_s_at	1.192	8.609	1.9e-11	3.5e-10	8.2	9.4	Eip74EF	CG32180	Ecdysone-induced protein 74EF
FBgn0031069	1629413_at	-1.17	11.904	1.9e-11	3.6e-10	12.09	10.92	CG12703	CG12703	NA
FBgn0036847	1637571_at	0.973	9.424	1.9e-11	3.6e-10	9.15	10.12	CG11577	CG11577	NA
FBgn0033048	1623229_at	-1.752	8.821	1.9e-11	3.6e-10	9.29	7.54	CG7881	CG7881	NA
FBgn0034588	1636970_at	-3.306	8.593	1.9e-11	3.6e-10	9.44	6.13	CG9394	CG9394	NA
NA	1627314_s_at	1.233	8.464	1.9e-11	3.6e-10	8.06	9.29	NA	NA	NA
FBgn0030306	1637839_at	0.577	10.236	2e-11	3.7e-10	10.02	10.6	Spase25	CG1751	Spase 25-subunit
FBgn0036727	1624670_at	0.979	8.424	2e-11	3.7e-10	8.04	9.02	CG7589	CG7589	NA
FBgn0027073	1630066_at	-1.177	9.948	2e-11	3.7e-10	10.26	9.08	CG4302	CG4302	NA
FBgn0030506	1641252_at	1.446	7.528	2e-11	3.7e-10	7	8.44	Lig4	CG12176	Ligase4
FBgn0017577	1626647_at	-2.022	7.959	2e-11	3.7e-10	8.61	6.59	Mcm5	CG4082	Minichromosome maintenance 5
FBgn0029763	1640240_s_at	-0.917	8.86	2e-11	3.8e-10	9.23	8.31	CG4165	CG4165	NA
FBgn0034948	1638701_at	0.768	10.397	2.1e-11	3.8e-10	10.17	10.94	CG3825	CG3825	NA
FBgn0000996	1624994_at	-1.828	8.737	2.1e-11	3.9e-10	9.42	7.59	dup	CG8171	double parked
FBgn0028690	1639091_at	0.669	11.552	2.1e-11	3.9e-10	11.36	12.03	Rpn5	CG1100	Rpn5
FBgn0003023	1641484_a_at	-4.835	7.213	2.1e-11	3.9e-10	8.88	4.04	otu	CG12743	ovarian tumor
FBgn0029167	1628018_at	1.745	7.854	2.2e-11	4e-10	7.24	8.99	Hml	CG7002	Hemolectin
FBgn0035400	1641635_s_at	0.834	9.648	2.2e-11	4e-10	9.09	9.92	CG11537	CG11537	NA
FBgn0261393	1641650_at	1.101	9.798	2.2e-11	4e-10	9.4	10.5	alpha-Est5	CG1089	alpha-Esterase-5
FBgn0027091	1625878_at	0.852	8.487	2.2e-11	4e-10	8.17	9.02	Aats-cys	CG8431	Cysteinyl-tRNA synthetase
FBgn0004379	1631630_at	-2.305	7.274	2.2e-11	4.1e-10	8.1	5.8	Klp67A	CG10923	Kinesin-like protein at 67A
FBgn0035811	1626566_at	-1.199	11.786	2.3e-11	4.1e-10	12.22	11.02	CG12262	CG12262	NA
FBgn0030501	1631037_at	-2.46	7.086	2.3e-11	4.2e-10	7.97	5.51	BthD	CG11177	BthD selenoprotein
FBgn0031143	1623959_at	-0.923	10.788	2.3e-11	4.2e-10	11.06	10.14	CG1532	CG1532	NA
NA	1637987_at	0.969	10.223	2.3e-11	4.2e-10	9.95	10.92	NA	NA	NA
FBgn0010803	1635547_a_at	0.813	8.473	2.4e-11	4.4e-10	8.16	8.97	Aats-trp	CG9735	Tryptophanyl-tRNA synthetase
FBgn0086443	1624475_at	0.862	9.718	2.4e-11	4.3e-10	9.45	10.31	Aats-asn	CG10687	Asparaginyl-tRNA synthetase
FBgn0015282	1630788_at	0.875	10.666	2.4e-11	4.3e-10	10.42	11.3	Pros26.4	CG5289	Proteasome 26S subunit subunit 4 ATPase
FBgn0035006	1631496_at	-3.328	7.864	2.4e-11	4.3e-10	8.93	5.61	CG4563	CG4563	NA
FBgn0024947	1630857_s_at	0.856	12.279	2.5e-11	4.4e-10	11.89	12.74	NTPase	CG3059	NTPase
FBgn0036684	1634563_at	-0.948	9.105	2.5e-11	4.4e-10	9.37	8.43	CG3764	CG3764	NA
FBgn0035640	1640938_at	-2.278	7.721	2.5e-11	4.4e-10	8.57	6.29	mad2	CG17498	mad2
FBgn0051272	1639934_at	1.9	10.397	2.5e-11	4.4e-10	9.73	11.64	CG31272	CG31272	NA
FBgn0053542	1641119_at	1.823	4.76	2.5e-11	4.4e-10	4.28	6.1	upd3	CG33542	NA
FBgn0038190	1628127_at	-2.612	5.728	2.5e-11	4.4e-10	6.58	3.96	CG9926	CG9926	NA
FBgn0031306	1640944_at	2.659	7.273	2.6e-11	4.6e-10	6.43	9.09	CG4577	CG4577	NA
FBgn0033476	1626170_at	0.956	11.241	2.6e-11	4.6e-10	10.88	11.84	CG18445	CG18445	oysgedart
FBgn0022710	1636219_at	-1.146	9.855	2.6e-11	4.6e-10	10.26	9.11	Ac13E	CG9210	Adenylyl cyclase 35C
FBgn0029766	1640884_at	1.918	11.365	2.6e-11	4.6e-10	10.78	12.7	CG15784	CG15784	NA
FBgn0037279	1638295_s_at	1.16	10.708	2.7e-11	4.7e-10	10.39	11.55	CG1129	CG1129	NA
FBgn0027341	1634707_s_at	1.06	9.973	2.7e-11	4.7e-10	9.8	10.86	Gfat1	CG12449	Glutamine:fructose-6-phosphate aminotransferase 1
FBgn0033273	1641671_at	-1.623	8.094	2.7e-11	4.7e-10	8.63	7.01	CG2183	CG2183	NA
FBgn0038957	1624405_a_at	-1.719	7.177	2.7e-11	4.7e-10	7.67	5.95	CG7059	CG7059	NA
FBgn0034122	1632714_at	-2.535	6.592	2.7e-11	4.8e-10	7.58	5.05	CG15711	CG15711	NA
FBgn0035887	1641052_at	-2.702	7.553	2.7e-11	4.7e-10	8.16	5.46	Jon66Cii	CG7170	NA
FBgn0026713	1623333_a_at	0.795	7.612	2.8e-11	4.8e-10	7.35	8.15	l(1)G0007	CG32604	lethal (1) G0007
FBgn0027512	1627172_s_at	-1.87	9.302	2.8e-11	4.8e-10	9.94	8.07	CG10254	CG10254	NA
FBgn0032639	1623871_at	2.608	4.739	2.8e-11	4.8e-10	3.92	6.53	CG18563	CG18563	NA
FBgn0030041	1635987_at	-1.459	11.897	2.8e-11	4.8e-10	12.31	10.85	CG12116	CG12116	NA
NA	1629740_at	-2.835	10.604	2.8e-11	4.9e-10	11.66	8.83	NA	NA	NA
FBgn0028969	1628472_at	0.789	10.75	2.9e-11	5e-10	10.46	11.25	deltaCOP	CG14813	delta-coatomer protein
FBgn0037718	1641563_at	1.2	10.943	3e-11	5.1e-10	10.45	11.65	P58IPK	CG8286	P58IPK
FBgn0035715	1636812_at	1.239	10.055	3e-11	5.1e-10	9.66	10.9	CG10103	CG10103	NA
FBgn0017558	1629515_at	-1.197	10.839	3e-11	5.2e-10	11.23	10.03	Pdk	CG8808	Pyruvate dehydrogenase kinase
FBgn0005674	1626523_a_at	0.644	10.103	3e-11	5.2e-10	9.85	10.49	Aats-glupro	CG5394	Glutamyl-prolyl-tRNA synthetase
FBgn0038325	1627764_at	0.839	9.044	3.1e-11	5.4e-10	8.81	9.65	CG6194	CG6194	NA
FBgn0039018	1631021_at	-1.843	6.292	3.1e-11	5.3e-10	6.95	5.11	CG4771	CG4771	NA
FBgn0030114	1628712_at	1.396	8.43	3.2e-11	5.4e-10	8.01	9.4	CG17754	CG17754	NA
FBgn0086356	1634690_at	-2.426	7.401	3.2e-11	5.4e-10	8.32	5.9	tum	CG13345	tumbleweed
FBgn0035871	1633498_at	2.541	5.942	3.3e-11	5.6e-10	5.2	7.75	CG7188	CG7188	NA
FBgn0034629	1633476_at	-1.58	10.269	3.3e-11	5.6e-10	10.66	9.08	Acox57D-d	CG9709	acyl-Coenzyme A oxidase at 57D distal
FBgn0001208	1638325_at	-1.045	10.563	3.3e-11	5.6e-10	10.85	9.8	Hn	CG7399	Henna
FBgn0050359	1629903_at	-1.235	8.117	3.3e-11	5.6e-10	8.5	7.26	CG30359	CG30359	Maltase A5
FBgn0035756	1633793_at	1.451	5.925	3.4e-11	5.7e-10	5.44	6.89	unc-13-4A	CG32381	unc-13-4A
FBgn0015926	1628322_at	-2.411	6.797	3.4e-11	5.7e-10	7.69	5.28	dah	CG6157	discontinuous actin hexagon
FBgn0038476	1623919_a_at	-1.863	9.949	3.4e-11	5.7e-10	10.63	8.77	kuk	CG5175	kugelkern
FBgn0040942	1628696_at	-1.739	8.298	3.4e-11	5.7e-10	8.67	6.93	CG12643	CG12643	NA
FBgn0013279	1632841_x_at	3.006	4.657	3.4e-11	5.7e-10	3.71	6.72	Hsp70Bc	CG6489	Heat-shock-protein-70Bc
FBgn0001257	1636202_s_at	1.22	11.413	3.4e-11	5.7e-10	11.2	12.42	ImpL2	CG15009	Ecdysone-inducible gene L2
FBgn0002873	1628717_a_at	-1.916	5.335	3.4e-11	5.7e-10	6.04	4.12	mud	CG12047	NA
FBgn0086697	1629217_at	-2.319	7.276	3.5e-11	5.8e-10	8.1	5.79	Cenp-C	CG31258	Cenp-C
FBgn0027554	1624863_a_at	1.291	7.638	3.5e-11	5.8e-10	7.16	8.45	CG8042	CG8042	NA
FBgn0027580	1639255_s_at	-0.819	12.206	3.5e-11	5.8e-10	12.44	11.62	CG1516	CG1516	NA
FBgn0030946	1635481_a_at	-1.414	9.231	3.5e-11	5.9e-10	9.5	8.08	CG6659	CG6659	NA
FBgn0010905	1633021_s_at	-1.111	8.686	3.6e-11	5.9e-10	8.98	7.87	Spn	CG16757	Spinophilin
FBgn0037312	1623356_at	1.071	9.516	3.6e-11	6e-10	9.09	10.16	CG11999	CG11999	NA
FBgn0039644	1632676_s_at	-0.751	10.289	3.6e-11	6e-10	10.55	9.79	CG11897	CG11897	NA
FBgn0034329	1633053_at	2.287	11.018	3.6e-11	6e-10	10.38	12.67	IM1	CG18108	Immune induced molecule 1
FBgn0030341	1633304_at	0.958	8.361	3.7e-11	6.1e-10	8.04	8.99	p24-1	CG1967	p24-related-1
FBgn0015568	1623885_at	-1.263	8.315	3.8e-11	6.2e-10	8.51	7.24	alpha-Est1	CG1031	alpha-Esterase-1
FBgn0020653	1641487_a_at	0.591	10.776	3.8e-11	6.2e-10	10.54	11.13	Trxr-1	CG2151	Thioredoxin reductase-1
FBgn0033095	1623039_at	-0.982	9.866	3.8e-11	6.2e-10	10.13	9.15	CG3409	CG3409	NA
FBgn0041160	1635336_at	1.752	8.016	3.9e-11	6.3e-10	7.48	9.23	comm2	CG7554	comm2
FBgn0037788	1627647_at	-2.491	8.885	3.9e-11	6.3e-10	9.66	7.16	CG3940	CG3940	NA
FBgn0039682	1625122_at	-0.982	12.642	3.9e-11	6.3e-10	12.97	11.99	Obp99c	CG7584	Odorant-binding protein 99c
FBgn0039942	1640669_at	-1.073	8.71	3.9e-11	6.3e-10	9.1	8.03	CG17163	CG17163	NA
FBgn0002673	1622992_at	-2.286	6.611	4e-11	6.4e-10	7.46	5.17	twe	CG4965	twine
FBgn0003483	1636886_at	-2.779	7.211	4e-11	6.4e-10	8.2	5.42	spn-E	CG3158	spindle E
FBgn0033928	1632639_at	2.411	7.992	4e-11	6.4e-10	7.28	9.69	Arc2	CG13941	Arc2
FBgn0040259	1624156_at	1.298	10.395	4e-11	6.5e-10	9.92	11.21	Ugt86Da	CG18578	Ugt86Da
FBgn0031741	1636409_at	-1.337	9.439	4e-11	6.5e-10	9.85	8.51	CG11034	CG11034	NA
FBgn0037567	1628755_at	1.138	7.592	4.1e-11	6.5e-10	7.21	8.35	Gfr	CG9620	Gfr
FBgn0051915	1627512_at	0.97	7.606	4.1e-11	6.5e-10	7.12	8.09	CG31915	CG31915	NA
FBgn0040653	1626345_at	2.007	11.415	4.1e-11	6.6e-10	10.79	12.8	IM4	CG15231	Immune induced molecule 4
FBgn0031813	1637461_at	-1.07	11.081	4.2e-11	6.6e-10	11.38	10.31	CG9527	CG9527	NA
FBgn0035402	1630178_at	0.775	8.646	4.2e-11	6.7e-10	8.41	9.19	CG12082	CG12082	NA
FBgn0037850	1639704_at	2.226	5.586	4.2e-11	6.7e-10	4.79	7.01	CG14695	CG14695	NA
FBgn0031307	1637772_at	1.909	7.882	4.2e-11	6.7e-10	7.17	9.08	CG4726	CG4726	NA
FBgn0024912	1639904_at	1.035	7.734	4.2e-11	6.7e-10	7.38	8.42	agt	CG1303	O-6-alkylguanine-DNA alkyltransferase
FBgn0034248	1637988_at	0.824	10.28	4.2e-11	6.7e-10	10.01	10.84	CG14483	CG14483	NA
FBgn0038854	1626768_at	1.024	8.366	4.3e-11	6.8e-10	7.99	9.01	CG7044	CG7044	NA
FBgn0031603	1628516_at	0.757	7.739	4.3e-11	6.8e-10	7.5	8.26	CG15432	CG15432	NA
FBgn0037291	1629027_at	0.978	5.951	4.3e-11	6.8e-10	5.56	6.54	CG14662	CG14662	NA
FBgn0035529	1641058_at	0.829	10.685	4.3e-11	6.8e-10	10.42	11.25	CG1319	CG1319	NA
FBgn0034276	1639819_at	1.686	4.829	4.3e-11	6.8e-10	4.25	5.93	CG6385	CG6385	NA
FBgn0004797	1636579_s_at	-1.117	9.036	4.4e-11	6.9e-10	9.41	8.29	mdy	CG31991	midway
NA	1629675_at	-1.948	4.813	4.4e-11	6.9e-10	5.33	3.39	NA	NA	NA
FBgn0032029	1628290_s_at	-0.978	10.306	4.5e-11	7e-10	10.49	9.51	CG17292	CG17292	NA
FBgn0028685	1640710_at	0.801	10.864	4.5e-11	7e-10	10.65	11.45	Rpt4	CG3455	Rpt4
FBgn0031677	1635831_at	-5.056	8.076	4.5e-11	7e-10	9.82	4.76	CG14036	CG14036	NA
FBgn0034275	1634012_at	-0.908	9.513	4.5e-11	7e-10	9.74	8.83	CG5002	CG5002	NA
FBgn0002787	1635259_at	0.681	10.864	4.5e-11	7e-10	10.66	11.34	Mov34	CG3416	Mov34
FBgn0010303	1626465_a_at	0.689	7.86	4.6e-11	7.1e-10	7.69	8.38	hep	CG4353	hemipterous
FBgn0035839	1637265_at	0.69	8.105	4.6e-11	7.1e-10	7.66	8.35	CG7550	CG7550	NA
FBgn0037647	1631776_at	1.018	9.728	4.6e-11	7.1e-10	9.41	10.43	RagA	CG11968	NA
FBgn0039821	1626577_at	1.353	9.304	4.6e-11	7.2e-10	8.85	10.2	CG15556	CG15556	NA
FBgn0027500	1631543_at	-2.619	8.149	4.6e-11	7.1e-10	9.09	6.47	spd-2	CG17286	NA
FBgn0038538	1631331_a_at	-5.278	8.229	4.6e-11	7.1e-10	10.03	4.75	pxt	CG7660	NA
FBgn0039849	1624246_s_at	-0.76	10.141	4.7e-11	7.2e-10	10.28	9.52	CG11334	CG11334	NA
FBgn0037717	1641287_at	-1.607	5.51	4.7e-11	7.2e-10	6.07	4.46	CG8301	CG8301	NA
FBgn0035347	1627478_at	0.999	10.802	4.7e-11	7.2e-10	10.5	11.5	CG33232	CG33232	NA
FBgn0039204	1637992_at	1.027	7.851	4.7e-11	7.2e-10	7.45	8.47	CG6607	CG6607	NA
FBgn0034113	1628091_at	1.283	6.229	4.8e-11	7.4e-10	5.78	7.07	CG8060	CG8060	NA
FBgn0050338	1640499_at	0.689	6.514	4.9e-11	7.5e-10	6.28	6.97	CG30338	CG30338	NA
FBgn0029925	1626579_at	0.857	8.72	4.9e-11	7.5e-10	8.42	9.28	CG3040	CG3040	NA
FBgn0040342	1631873_at	-1.971	9.676	4.9e-11	7.5e-10	10.32	8.35	CG3706	CG3706	NA
FBgn0041342	1629930_s_at	0.974	9.723	5e-11	7.6e-10	9.42	10.4	Cct1	CG1049	CTP:phosphocholine cytidylyltransferase 1
FBgn0026439	1641104_s_at	-1.153	9.65	5e-11	7.6e-10	9.95	8.8	Eaat1	CG3747	Excitatory amino acid transporter 1
FBgn0014469	1627844_at	-0.903	12.107	5e-11	7.6e-10	12.41	11.51	Cyp4e2	CG2060	Cytochrome P450-4e2
FBgn0038088	1627073_a_at	1.624	10.611	5e-11	7.6e-10	10.12	11.75	CG10126	CG10126	NA
FBgn0026056	1637284_at	0.948	8.466	5e-11	7.6e-10	8.16	9.11	Rlip	CG11622	Ral interacting protein
FBgn0039638	1629901_at	-1.428	6.393	5.1e-11	7.7e-10	6.92	5.49	dgt6	CG11881	dim gamma-tubulin 6
FBgn0040398	1636804_at	-1.232	11.441	5.1e-11	7.7e-10	11.7	10.47	CG14629	CG14629	NA
FBgn0040087	1622968_at	1.197	8.703	5.1e-11	7.7e-10	8.3	9.5	p115	CG1422	p115
NA	1635548_s_at	-1.755	11.44	5.1e-11	7.6e-10	12.18	10.43	NA	NA	NA
NA	1637366_at	2.624	6.062	5.1e-11	7.6e-10	5.16	7.79	NA	NA	NA
FBgn0000114	1627834_a_at	-2.669	9.897	5.2e-11	7.8e-10	10.82	8.15	aret	CG31762	arrest
FBgn0036745	1628883_at	1.027	9.859	5.2e-11	7.8e-10	9.51	10.54	CG7484	CG7484	NA
FBgn0010317	1640972_at	-2.598	5.468	5.2e-11	7.8e-10	6.36	3.77	CycJ	CG10308	Cyclin J
FBgn0010014	1641460_at	1.893	4.976	5.3e-11	7.8e-10	4.4	6.3	CanB	CG4209	Calcineurin B
FBgn0085451	1641329_at	0.643	8.38	5.3e-11	7.9e-10	8.19	8.83	CG34422	CG34422	NA
FBgn0030593	1631072_at	-1.214	11.094	5.3e-11	7.9e-10	11.35	10.13	CG9512	CG9512	NA
FBgn0031768	1624890_s_at	0.669	8.893	5.3e-11	7.9e-10	8.67	9.34	CG12393	CG12393	NA
FBgn0002525	1636809_at	0.708	8.928	5.3e-11	7.9e-10	8.76	9.47	Lam	CG6944	Lamin
FBgn0030790	1636727_at	-1.348	7.962	5.4e-11	8e-10	8.48	7.13	CG4768	CG4768	NA
FBgn0029879	1631407_a_at	-2.282	5.67	5.4e-11	8.1e-10	6.48	4.2	APC7	CG14444	Anaphase promoting complex 7
FBgn0053493	1632911_at	-1.495	9.314	5.5e-11	8.1e-10	9.78	8.28	CG33493	CG33493	NA
FBgn0000147	1627325_at	-1.976	7.153	5.5e-11	8.1e-10	7.9	5.92	aur	CG3068	aurora
FBgn0028955	1634036_at	-1.331	11.124	5.5e-11	8.1e-10	11.49	10.16	CG8788	CG8788	NA
NA	1641214_at	0.762	8.324	5.5e-11	8.1e-10	8.03	8.79	NA	NA	NA
NA	1629061_s_at	3.286	8.847	5.5e-11	8.1e-10	7.74	11.03	NA	NA	NA
FBgn0001086	1636341_at	-2.352	7.631	5.6e-11	8.1e-10	8.51	6.16	fzy	CG4274	fizzy
FBgn0035266	1633956_s_at	-1.813	10.225	5.6e-11	8.1e-10	10.78	8.96	CG7995	CG7995	NA
FBgn0051304	1640335_at	-1.408	7.607	5.6e-11	8.2e-10	7.89	6.48	CG31304	CG31304	NA
FBgn0000083	1626707_a_at	1.182	11.541	5.8e-11	8.5e-10	11.22	12.41	AnnIX	CG5730	Annexin IX
NA	1635709_at	0.992	10.872	5.8e-11	8.5e-10	10.51	11.5	NA	NA	NA
FBgn0031745	1626233_at	1.963	9.059	5.9e-11	8.6e-10	8.41	10.37	CG8965	CG8965	NA
FBgn0028480	1623704_at	-1.208	11.724	5.9e-11	8.6e-10	12.06	10.85	CG17841	CG17841	NA
FBgn0038191	1632525_at	-3.777	6.492	6.1e-11	8.9e-10	7.81	4.03	CG9925	CG9925	NA
FBgn0051469	1633844_at	2.994	6.201	6.2e-11	8.9e-10	4.9	7.89	CG31469	CG31469	NA
FBgn0030912	1640327_at	0.805	7.264	6.2e-11	8.9e-10	7.02	7.82	CG6023	CG6023	NA
FBgn0033757	1639471_s_at	-1.722	7.808	6.2e-11	8.9e-10	8.46	6.74	muskelin	CG8811	muskelin
FBgn0032643	1625519_at	0.907	9.736	6.2e-11	8.9e-10	9.43	10.33	CG6453	CG6453	NA
FBgn0030099	1638297_at	0.661	8.006	6.2e-11	8.9e-10	7.71	8.37	CG12056	CG12056	NA
FBgn0030569	1629458_at	1.537	7.452	6.2e-11	8.9e-10	6.94	8.48	CG9411	CG9411	NA
NA	1636213_at	1.871	6.275	6.2e-11	8.9e-10	5.54	7.41	NA	NA	NA
FBgn0020637	1640975_at	-2.02	5.899	6.3e-11	9e-10	6.65	4.63	Lcp65Ag2	CG10534	Lcp65Ag2
FBgn0034328	1629530_at	3.501	9.088	6.3e-11	9e-10	8.08	11.58	IM23	CG15066	Immune induced molecule 23
NA	1624542_at	0.947	5.896	6.3e-11	9e-10	5.59	6.54	NA	NA	NA
FBgn0020508	1629199_at	-2.522	10.457	6.4e-11	9.1e-10	11.56	9.04	Ag5r2	CG9540	Antigen 5-related 2
FBgn0026189	1641333_s_at	1.211	7.964	6.4e-11	9.1e-10	7.66	8.87	prominin-like	CG7740	prominin-like
FBgn0035589	1635521_at	0.854	8.731	6.5e-11	9.3e-10	8.49	9.34	CG4618	CG4618	Charged multivesicular body protein 2b
FBgn0037743	1634528_at	0.971	8.191	6.7e-11	9.5e-10	7.77	8.74	CG8412	CG8412	NA
FBgn0026208	1634722_s_at	1.09	11.261	6.7e-11	9.6e-10	10.86	11.95	mbf1	CG4143	NA
FBgn0033921	1638729_at	-2.055	6.643	6.9e-11	9.8e-10	7.45	5.39	CG8589	CG8589	tejas
FBgn0027529	1638929_at	-2.149	7.187	6.9e-11	9.8e-10	7.88	5.74	CG8920	CG8920	NA
FBgn0036290	1626801_at	1.635	9.5	6.9e-11	9.8e-10	9.12	10.76	CG10638	CG10638	NA
FBgn0012049	1635904_s_at	-0.906	9.369	6.9e-11	9.7e-10	9.69	8.79	BtbVII	CG11494	NA
FBgn0023095	1638580_at	0.766	8.456	7e-11	9.8e-10	8.27	9.03	caps	CG11282	capricious
FBgn0031224	1628565_at	0.797	9.37	7.1e-11	9.9e-10	9.15	9.95	CG11454	CG11454	NA
FBgn0052369	1635093_a_at	1.456	7.384	7.1e-11	1e-09	6.96	8.42	CG32369	CG32369	NA
FBgn0039640	1634302_s_at	-1.878	8.559	7.1e-11	1e-09	9.19	7.32	CG14516	CG14516	NA
FBgn0034447	1638510_at	-1.226	8.693	7.2e-11	1e-09	9.13	7.91	CG7744	CG7744	NA
FBgn0035209	1636267_at	-2.142	6.725	7.2e-11	1e-09	7.55	5.41	msd1	CG13914	mitotic spindle density 1
FBgn0001149	1628353_at	0.995	13.342	7.2e-11	1e-09	13.03	14.02	GstD1	CG10045	Glutathione S transferase D1
FBgn0035425	1631724_s_at	0.9	10.518	7.2e-11	1e-09	10.24	11.14	CG17746	CG17746	NA
FBgn0032744	1639676_at	1.226	7.183	7.3e-11	1e-09	6.79	8.01	CG15173	CG15173	NA
FBgn0052751	1630310_at	-5.686	7.568	7.3e-11	1e-09	9.57	3.88	CG32751	CG32751	NA
FBgn0039319	1633857_at	2.448	9.481	7.5e-11	1e-09	8.52	10.97	CG13659	CG13659	NA
FBgn0033350	1635281_at	0.819	8.84	7.5e-11	1e-09	8.51	9.33	CG8237	CG8237	NA
FBgn0039776	1628705_at	1.705	8.953	7.5e-11	1e-09	8.36	10.07	PH4alphaEFB	CG31022	prolyl-4-hydroxylase-alpha EFB
FBgn0030321	1637887_at	0.626	9.99	7.5e-11	1e-09	9.78	10.41	CG1703	CG1703	NA
FBgn0024984	1623025_at	-1.425	5.382	7.5e-11	1e-09	5.95	4.53	CG3457	CG3457	NA
FBgn0034736	1628645_at	2.183	9.403	7.6e-11	1.1e-09	8.18	10.36	CG6018	CG6018	NA
NA	1624380_at	0.705	8.676	7.6e-11	1e-09	8.45	9.15	NA	NA	NA
FBgn0038716	1629428_at	-1.324	4.933	7.7e-11	1.1e-09	5.34	4.02	CG7342	CG7342	NA
FBgn0004106	1631861_at	-2.274	8.787	7.7e-11	1.1e-09	9.62	7.34	cdc2	CG5363	cdc2
FBgn0000721	1629886_s_at	-1.053	11.785	7.8e-11	1.1e-09	12.08	11.03	for	CG10033	foraging
FBgn0037016	1629062_at	1.498	10.314	7.9e-11	1.1e-09	9.84	11.34	CG13252	CG13252	NA
NA	1633642_at	-2.408	7.418	7.9e-11	1.1e-09	8.13	5.73	NA	NA	NA
FBgn0033773	1640434_at	-3.44	6.376	8e-11	1.1e-09	7.55	4.11	mos	CG8767	mos
NA	1631321_s_at	-2.69	10.023	8e-11	1.1e-09	11.03	8.34	NA	NA	NA
FBgn0036522	1636156_at	-1.493	7.25	8.2e-11	1.1e-09	7.87	6.38	CG7372	CG7372	NA
FBgn0033374	1633051_at	-3.414	6.971	8.2e-11	1.1e-09	8.11	4.7	CG13741	CG13741	NA
FBgn0001089	1633914_at	-2.452	9.912	8.3e-11	1.1e-09	10.76	8.3	Gal	CG9092	beta galactosidase
FBgn0015240	1639398_at	0.878	10.089	8.3e-11	1.1e-09	9.81	10.68	Hr96	CG11783	Hormone receptor-like in 96
FBgn0036576	1639803_at	-1.092	9.189	8.3e-11	1.1e-09	9.45	8.36	CG5151	CG5151	NA
FBgn0030460	1639328_at	0.951	7.853	8.4e-11	1.1e-09	7.55	8.5	CG2453	CG2453	NA
FBgn0034936	1626725_at	0.765	9.101	8.5e-11	1.1e-09	8.83	9.6	CG2970	CG2970	NA
FBgn0037617	1633861_at	0.867	7.278	8.6e-11	1.2e-09	6.9	7.76	CG8145	CG8145	NA
FBgn0037714	1641627_at	-2.074	9.253	8.6e-11	1.2e-09	9.72	7.64	CG9396	CG9396	NA
FBgn0031998	1625857_at	-1.581	10.137	8.6e-11	1.2e-09	10.54	8.96	CG8451	CG8451	NA
FBgn0004107	1640394_s_at	-1.86	8.012	8.7e-11	1.2e-09	8.69	6.83	cdc2c	CG10498	cdc2c
FBgn0036324	1630649_at	1.529	5.69	8.8e-11	1.2e-09	5.14	6.67	CG12520	CG12520	NA
FBgn0022772	1626652_at	-1.822	7.665	9e-11	1.2e-09	8.33	6.5	Orc1	CG10667	Origin recognition complex subunit 1
FBgn0037025	1628318_at	-1.644	5.9	9e-11	1.2e-09	6.55	4.91	Spc105R	CG11451	Spc105-related
FBgn0031327	1638892_at	1.936	8.652	9.1e-11	1.2e-09	7.88	9.81	CG5397	CG5397	NA
FBgn0000565	1625276_a_at	-2.063	9.397	9.1e-11	1.2e-09	10.08	8.02	Eip71CD	CG7266	Ecdysone-induced protein 28/29kD
FBgn0034045	1640126_at	1.491	7.801	9.1e-11	1.2e-09	7.31	8.8	CG8249	CG8249	NA
FBgn0036481	1624787_s_at	2.473	4.79	9.1e-11	1.2e-09	4.07	6.55	CG16959	CG16959	NA
FBgn0037547	1633357_at	-0.816	11.148	9.2e-11	1.2e-09	11.47	10.66	CG7910	CG7910	NA
FBgn0030695	1638119_at	0.649	9.966	9.2e-11	1.2e-09	9.69	10.34	PGRP-LE	CG8995	Peptidoglycan recognition protein LE
FBgn0031654	1639196_at	-4.896	10.467	9.2e-11	1.2e-09	11.99	7.09	Jon25Bii	CG8869	Jonah 25Bii
NA	1634920_at	1.01	8.8	9.2e-11	1.2e-09	8.48	9.49	NA	NA	NA
FBgn0040372	1624780_at	-1.123	7.561	9.3e-11	1.2e-09	7.98	6.85	G9a	CG2995	G9a
FBgn0034913	1625742_at	0.815	9.901	9.5e-11	1.3e-09	9.66	10.47	usnp	CG11173	ubisnap
FBgn0003292	1638012_at	-2.134	5.779	9.5e-11	1.3e-09	6.47	4.33	rt	CG6097	rotated abdomen
FBgn0038953	1634222_at	1.51	7.974	9.5e-11	1.3e-09	7.49	9	CG18596	CG18596	NA
FBgn0026077	1626893_at	1.294	7.722	9.6e-11	1.3e-09	7.15	8.44	Gasp	CG10287	Gasp
FBgn0037820	1632648_at	1.731	5.599	9.6e-11	1.3e-09	5.33	7.06	CG14681	CG14681	NA
FBgn0035401	1625755_at	0.759	8.894	9.7e-11	1.3e-09	8.51	9.27	CG1291	CG1291	NA
FBgn0032840	1624838_a_at	1.742	4.463	9.7e-11	1.3e-09	3.87	5.61	sNPF	CG13968	short neuropeptide F precursor
FBgn0003717	1639321_s_at	-1.362	9.664	9.7e-11	1.3e-09	10.16	8.8	Tl	CG5490	NA
FBgn0002781	1625283_at	-1.271	6.012	9.8e-11	1.3e-09	6.49	5.22	mod(mdg4)	CG32491	modifier of mdg4
FBgn0031519	1624312_at	-1.253	5.687	9.8e-11	1.3e-09	6.15	4.89	CG3326	CG3326	NA
FBgn0038652	1630635_s_at	-1.888	10.298	9.8e-11	1.3e-09	10.77	8.88	CG7720	CG7720	NA
FBgn0032521	1633876_at	-1.429	6.909	9.9e-11	1.3e-09	7.5	6.07	CG7110	CG7110	NA
FBgn0038984	1636967_a_at	-1.281	11.936	9.9e-11	1.3e-09	12.29	11.01	CG5315	CG5315	NA
FBgn0035344	1625338_at	1.278	9.031	9.9e-11	1.3e-09	8.37	9.65	Cyp4d20	CG16761	Cyp4d20
FBgn0003401	1630245_at	-1.624	7.621	9.9e-11	1.3e-09	8.21	6.59	shu	CG4735	shutdown
FBgn0034292	1633532_at	-1.271	10.641	9.9e-11	1.3e-09	10.9	9.63	CG5767	CG5767	NA
FBgn0033221	1630003_at	0.784	11.625	1e-10	1.3e-09	11.37	12.16	CG12825	CG12825	NA
FBgn0032189	1623906_at	-1.34	7.707	1e-10	1.3e-09	8.21	6.87	Ripalpha	CG18145	RPA-interacting protein alpha
FBgn0000406	1632623_at	-1.973	11.356	1e-10	1.3e-09	11.92	9.95	Cyt-b5-r	CG13279	Cytochrome b5-related
FBgn0027088	1636948_a_at	0.745	9.405	1e-10	1.3e-09	9.16	9.91	Aats-gly	CG6778	Glycyl-tRNA synthetase
FBgn0011570	1630572_at	1.079	10.244	1e-10	1.3e-09	9.98	11.06	cpb	CG17158	capping protein beta
FBgn0034564	1628560_at	0.763	9.033	1e-10	1.3e-09	8.82	9.58	CG9344	CG9344	NA
FBgn0035571	1623258_at	1.231	9.185	1.1e-10	1.4e-09	8.67	9.9	CG12493	CG12493	NA
FBgn0038035	1636131_at	1.042	8.04	1.1e-10	1.4e-09	7.71	8.75	lig3	CG17227	DNA ligase III
FBgn0036291	1626431_at	0.707	7.898	1.1e-10	1.4e-09	7.64	8.35	CG10681	CG10681	NA
FBgn0030425	1640399_at	-2.162	9	1.1e-10	1.4e-09	9.55	7.39	CG3775	CG3775	NA
FBgn0030334	1628715_a_at	1.88	5.779	1.1e-10	1.4e-09	5.17	7.05	Karl	CG4139	Karl
FBgn0086446	1626156_at	0.71	8.894	1.1e-10	1.4e-09	8.7	9.41	l(2)37Ce	CG17347	lethal (2) 37Ce
FBgn0052280	1627930_s_at	0.796	11.338	1.1e-10	1.4e-09	11.06	11.85	CG32280	CG32280	NA
FBgn0032140	1634978_at	3.024	9.257	1.1e-10	1.4e-09	8.44	11.47	CG13117	CG13117	NA
FBgn0004198	1625385_at	1.286	6.837	1.1e-10	1.4e-09	6.4	7.69	ct	CG11387	cut
FBgn0051133	1635895_at	1.106	7.144	1.1e-10	1.4e-09	6.8	7.91	CG31133	CG31133	Seryl-tRNA synthetase-like insect mitochondrial protein
FBgn0003423	1640090_a_at	-0.996	8.542	1.1e-10	1.4e-09	8.84	7.85	slgA	CG1417	sluggish A
FBgn0010812	1640009_at	0.896	7.712	1.1e-10	1.4e-09	7.48	8.37	Tom34	CG2708	NA
FBgn0034417	1624466_a_at	1.461	8.79	1.1e-10	1.4e-09	8.42	9.88	CG15117	CG15117	NA
FBgn0010611	1634072_s_at	0.886	10.695	1.1e-10	1.4e-09	10.4	11.29	Hmgs	CG4311	HMG Coenzyme A synthase
FBgn0032069	1636395_at	-3.553	8.677	1.1e-10	1.4e-09	9.3	5.75	CG9468	CG9468	NA
FBgn0000352	1633554_at	-1.068	8.554	1.1e-10	1.4e-09	8.97	7.9	cos	CG1708	costa
FBgn0024320	1640496_at	1.177	9.749	1.1e-10	1.4e-09	9.42	10.6	Npc1a	CG5722	Niemann-Pick type C-1a
FBgn0015037	1638053_at	1.433	11.849	1.1e-10	1.4e-09	11.47	12.9	Cyp4p1	CG10842	Cytochrome P450-4p1
FBgn0086365	1636800_at	1.383	7.12	1.1e-10	1.4e-09	6.64	8.03	Orct2	CG13610	Organic cation transporter 2
NA	1639692_s_at	0.621	9.505	1.1e-10	1.4e-09	9.34	9.96	NA	NA	NA
FBgn0036122	1631994_a_at	1.966	8.221	1.1e-10	1.4e-09	7.74	9.7	Mocs1	CG33048	NA
FBgn0005563	1640614_at	1.907	5.107	1.1e-10	1.4e-09	4.55	6.46	cac	CG1522	NA
FBgn0037357	1628598_s_at	0.81	9.745	1.1e-10	1.4e-09	9.44	10.25	sec23	CG1250	NA
FBgn0032645	1641222_at	1.459	4.748	1.1e-10	1.4e-09	4.31	5.77	CG15142	CG15142	NA
FBgn0053208	1623984_s_at	1.444	6.306	1.2e-10	1.5e-09	5.86	7.3	Mical	CG33208	Molecule interacting with CasL
FBgn0031779	1628795_s_at	0.7	7.871	1.2e-10	1.4e-09	7.65	8.35	CG9175	CG9175	NA
FBgn0034261	1640577_a_at	-0.86	7.956	1.2e-10	1.4e-09	8.23	7.37	CG4966	CG4966	Hermansky-Pudlak Syndrome 4 ortholog
FBgn0039154	1634158_at	-1.565	10.712	1.2e-10	1.4e-09	11.09	9.53	Npc2f	CG6164	Niemann-Pick type C-2f
FBgn0032910	1624243_at	-0.898	8.786	1.2e-10	1.4e-09	9.05	8.15	CG9265	CG9265	NA
FBgn0027497	1639453_at	0.741	7.306	1.2e-10	1.5e-09	7.02	7.77	Madm	CG1098	MLF1-adaptor molecule
FBgn0086911	1628143_a_at	0.749	9.522	1.2e-10	1.5e-09	9.25	10	rg	CG6775	rugose
FBgn0038613	1636240_at	-1.743	8.612	1.2e-10	1.5e-09	9	7.25	CG7678	CG7678	Vacuolar H[+] ATPase subunit 100-4
FBgn0033543	1641714_at	-1.551	9.771	1.2e-10	1.5e-09	10.15	8.6	CG12338	CG12338	NA
FBgn0032075	1629358_s_at	0.563	13.033	1.2e-10	1.5e-09	12.85	13.42	Tsp29Fb	CG9496	Tetraspanin 29Fb
FBgn0020249	1625223_a_at	0.511	11.269	1.2e-10	1.5e-09	11.1	11.62	stck	CG7954	steamer duck
FBgn0004377	1626268_at	1.033	6.334	1.2e-10	1.5e-09	5.93	6.97	Klp54D	CG15844	NA
NA	1640955_s_at	2.503	5.419	1.2e-10	1.5e-09	4.7	7.2	NA	NA	NA
NA	1632458_at	-2.215	7.676	1.2e-10	1.5e-09	8.53	6.32	NA	NA	NA
FBgn0053169	1641489_at	0.582	8.255	1.3e-10	1.5e-09	8.01	8.59	CG33169	CG33169	NA
FBgn0052196	1636151_at	1.06	8.384	1.3e-10	1.5e-09	8	9.06	CG32196	CG32196	NA
FBgn0023175	1634795_a_at	0.602	11.294	1.3e-10	1.5e-09	11.14	11.74	Prosalpha7	CG1519	Proteasome alpha7 subunit
FBgn0034394	1634762_a_at	-1.977	11.203	1.3e-10	1.5e-09	11.77	9.79	CG15096	CG15096	NA
FBgn0004169	1630261_a_at	0.59	10.306	1.3e-10	1.5e-09	10.08	10.67	up	CG7107	upheld
FBgn0038790	1628446_at	-1.912	11.896	1.3e-10	1.5e-09	12.55	10.64	MtnC	CG5097	Metallothionein C
FBgn0000376	1641644_s_at	-1.4	6.778	1.3e-10	1.6e-09	7.29	5.89	crm	CG2714	cramped
FBgn0051641	1626294_a_at	-1.863	8.265	1.3e-10	1.6e-09	8.92	7.05	stai	CG31641	stathmin
FBgn0037893	1639895_at	0.553	10.526	1.3e-10	1.6e-09	10.37	10.93	CG6719	CG6719	NA
FBgn0003444	1634442_at	-0.744	8.281	1.3e-10	1.6e-09	8.54	7.79	smo	CG11561	smoothened
FBgn0043470	1630241_at	-1.074	12.157	1.3e-10	1.6e-09	12.51	11.44	lambdaTry	CG12350	lambdaTry
FBgn0035087	1633613_at	-0.723	12.908	1.3e-10	1.6e-09	13.17	12.45	CG2765	CG2765	NA
FBgn0039106	1631913_at	1.825	5.263	1.3e-10	1.6e-09	4.67	6.49	CG10301	CG10301	NA
NA	1627936_s_at	1.491	7.981	1.3e-10	1.6e-09	7.15	8.64	NA	NA	NA
FBgn0034527	1631690_a_at	0.85	8.276	1.4e-10	1.6e-09	8.04	8.89	CG9945	CG9945	NA
FBgn0031906	1629029_at	-1.514	5.656	1.4e-10	1.7e-09	6.27	4.75	CG5160	CG5160	NA
FBgn0031872	1629794_at	-1.258	6.703	1.4e-10	1.7e-09	7.17	5.91	iHog	CG9211	interference hedgehog
FBgn0033550	1623499_at	0.543	7.622	1.4e-10	1.7e-09	7.47	8.02	CG12341	CG12341	NA
FBgn0014000	1635989_at	-1.406	10.613	1.4e-10	1.7e-09	10.98	9.58	Hf	CG10658	Helical Factor
FBgn0035608	1626606_at	0.914	4.396	1.4e-10	1.7e-09	4.1	5.01	CG10630	CG10630	blanks
FBgn0035591	1625162_at	0.889	7.099	1.4e-10	1.7e-09	6.82	7.71	CG4611	CG4611	NA
FBgn0004436	1630287_at	0.701	10.062	1.4e-10	1.7e-09	9.92	10.62	UbcD6	CG2013	Ubiquitin conjugating enzyme
FBgn0032035	1631595_at	0.703	10.526	1.4e-10	1.7e-09	10.31	11.01	CG13393	CG13393	NA
FBgn0085354	1633232_at	1.409	8.879	1.4e-10	1.7e-09	8.36	9.77	CG34325	CG34325	NA
FBgn0031645	1632317_at	-1.452	10.861	1.4e-10	1.7e-09	11.23	9.78	CG3036	CG3036	NA
FBgn0023179	1625280_at	1.926	6.336	1.4e-10	1.7e-09	5.57	7.5	amon	CG6438	amontillado
FBgn0061469	1632309_at	0.686	8.919	1.5e-10	1.7e-09	8.73	9.42	As	CG6190	Ubiquitin protein ligase E3A
FBgn0033686	1623887_at	-1.209	6.01	1.5e-10	1.7e-09	6.43	5.22	Pimet	CG12367	NA
FBgn0032781	1639553_at	0.911	8.572	1.5e-10	1.8e-09	8.3	9.21	CG9987	CG9987	NA
FBgn0005612	1638050_s_at	1.443	8.668	1.5e-10	1.8e-09	8.27	9.72	Sox14	CG3090	Sox box protein 14
FBgn0027081	1640984_s_at	0.832	9.914	1.5e-10	1.8e-09	9.63	10.47	Aats-thr	CG5353	Threonyl-tRNA synthetase
FBgn0031815	1639346_at	-0.734	9.82	1.5e-10	1.8e-09	10.12	9.38	CG9526	CG9526	farjavit
FBgn0003867	1641143_s_at	-0.805	8.935	1.5e-10	1.8e-09	9.18	8.38	tsl	CG6705	torso-like
NA	1641486_at	0.749	6.977	1.5e-10	1.8e-09	6.76	7.51	NA	NA	NA
NA	1623518_s_at	-1.2	11.474	1.5e-10	1.8e-09	11.84	10.64	NA	NA	NA
FBgn0027842	1626147_s_at	-2.011	11.278	1.5e-10	1.8e-09	12.1	10.09	CPTI	CG12891	NA
FBgn0032699	1629398_at	1.069	8.875	1.6e-10	1.8e-09	8.55	9.62	CG10383	CG10383	NA
FBgn0037719	1639882_at	0.913	8.813	1.6e-10	1.8e-09	8.58	9.49	bocksbeutel	CG9424	bocksbeutel
FBgn0003137	1635210_a_at	1.539	10.351	1.6e-10	1.9e-09	9.86	11.4	Ppn	CG33103	Papilin
FBgn0040475	1630606_at	1.413	9.84	1.6e-10	1.9e-09	9.46	10.87	SH3PX1	CG6757	SH3PX1
FBgn0035470	1626344_at	1.014	6.971	1.6e-10	1.9e-09	6.58	7.59	CG14980	CG14980	NA
FBgn0037664	1625738_at	-2.055	5.389	1.6e-10	1.8e-09	6.13	4.08	CG8420	CG8420	NA
FBgn0047199	1634114_at	-2.295	5.288	1.6e-10	1.9e-09	6.15	3.86	CG31517	CG31517	NA
NA	1640154_at	1.096	7.274	1.6e-10	1.9e-09	7	8.1	NA	NA	NA
FBgn0026061	1626990_s_at	-2.22	10.195	1.7e-10	1.9e-09	10.56	8.34	Mipp1	CG4123	Multiple inositol polyphosphate phosphatase 1
FBgn0003527	1627009_at	-1.59	5.642	1.7e-10	1.9e-09	6.19	4.6	stil	CG8592	stand still
FBgn0032295	1640042_at	-1.33	8.551	1.7e-10	1.9e-09	9.08	7.75	CG12299	CG12299	NA
FBgn0015571	1625354_at	0.862	9.804	1.7e-10	1.9e-09	9.45	10.31	alpha-Est3	CG1257	alpha-Esterase-3
FBgn0036118	1628249_at	0.665	7.88	1.7e-10	1.9e-09	7.64	8.3	CG14145	CG14145	BLOC-1 subunit 2
FBgn0033395	1640566_at	1.203	9.627	1.7e-10	1.9e-09	9.27	10.47	Cyp4p2	CG1944	Cyp4p2
FBgn0037770	1636745_at	-1.243	8.053	1.7e-10	1.9e-09	8.5	7.26	Art4	CG5358	Arginine methyltransferase 4
FBgn0033377	1628550_a_at	0.965	8.797	1.7e-10	1.9e-09	8.59	9.55	Pmm45A	CG8073	Phosphomannomutase 45A
FBgn0035631	1627497_at	0.496	10.782	1.7e-10	1.9e-09	10.63	11.13	Txl	CG5495	Thioredoxin-like
FBgn0038603	1640486_s_at	-1.506	8.94	1.7e-10	1.9e-09	9.35	7.85	PKD	CG7125	Protein Kinase D
FBgn0040954	1640352_at	0.752	11.349	1.7e-10	2e-09	11.13	11.88	CG13779	CG13779	NA
FBgn0031070	1634457_at	-1.224	4.581	1.7e-10	2e-09	5	3.78	CG12702	CG12702	NA
FBgn0038734	1626098_at	0.863	8.293	1.7e-10	1.9e-09	7.73	8.59	CG11453	CG11453	NA
FBgn0027593	1628915_s_at	0.912	7.967	1.7e-10	2e-09	7.68	8.59	Exn	CG3799	NA
FBgn0035176	1637224_at	3.724	11.401	1.7e-10	2e-09	10.2	13.92	CG13905	CG13905	NA
FBgn0040208	1626706_at	1.476	9.481	1.8e-10	2e-09	9.09	10.56	katanin-60	CG10229	katanin 60
FBgn0030090	1625249_at	-1.961	6.571	1.8e-10	2e-09	7.26	5.3	fend	CG12664	forked end
FBgn0036516	1634652_a_at	1.247	8.636	1.8e-10	2e-09	8.27	9.52	CG7656	CG7656	NA
FBgn0039249	1637383_at	0.963	8.208	1.8e-10	2e-09	7.91	8.87	CG11168	CG11168	NA
FBgn0004655	1636092_a_at	-1.375	8.569	1.8e-10	2e-09	9.07	7.69	wapl	CG3707	wings apart-like
FBgn0028515	1632026_at	0.912	9.541	1.8e-10	2.1e-09	9.29	10.2	EndoGI	CG4930	Endonuclease G inhibitor
FBgn0034046	1635089_at	-1.121	7.5	1.8e-10	2.1e-09	7.74	6.62	tun	CG8253	tungus
FBgn0027929	1628174_at	1.508	6.298	1.8e-10	2.1e-09	5.72	7.23	nimB1	CG33119	nimrod B1
FBgn0040262	1629836_at	1.785	6.785	1.8e-10	2.1e-09	5.94	7.73	Ugt36Ba	CG13270	NA
NA	1629115_s_at	-1.17	7.01	1.8e-10	2.1e-09	7.5	6.33	NA	NA	NA
FBgn0259896	1639502_at	1.898	7.177	1.9e-10	2.1e-09	6.58	8.48	nimC1	CG8942	nimrod C1
FBgn0038449	1628818_at	-1.372	9.284	1.9e-10	2.1e-09	9.81	8.44	CG17562	CG17562	NA
FBgn0039800	1627595_at	-1.023	10.922	1.9e-10	2.1e-09	11.19	10.17	Npc2g	CG11314	Niemann-Pick type C-2g
FBgn0034639	1633872_at	0.811	8.173	1.9e-10	2.1e-09	7.84	8.65	CG15673	CG15673	NA
FBgn0033980	1632021_at	1.347	7.325	1.9e-10	2.1e-09	6.88	8.23	Cyp6a20	CG10245	Cyp6a20
FBgn0047114	1625733_at	0.986	7.781	1.9e-10	2.1e-09	7.43	8.42	CG31142	CG31142	NA
FBgn0025641	1629015_a_at	-1.317	8.519	1.9e-10	2.1e-09	8.95	7.64	DAAM	CG14622	Dishevelled Associated Activator of Morphogenesis
FBgn0035154	1632584_at	-1.153	11.534	1.9e-10	2.1e-09	12.08	10.93	CG3344	CG3344	NA
FBgn0001977	1627249_a_at	0.984	9.326	1.9e-10	2.1e-09	9.06	10.04	l(2)35Bg	CG4180	lethal (2) 35Bg
FBgn0051909	1638603_at	-1.351	6.243	1.9e-10	2.2e-09	6.76	5.41	CG31909	CG31909	NA
FBgn0038717	1630528_at	-2.902	8.604	1.9e-10	2.2e-09	9.18	6.27	CG17751	CG17751	NA
FBgn0050287	1627091_at	2.302	5.441	1.9e-10	2.1e-09	4.78	7.08	CG30287	CG30287	NA
FBgn0031571	1634283_at	1.14	7.82	1.9e-10	2.1e-09	7.55	8.69	CG3921	CG3921	NA
FBgn0031381	1625334_at	1.139	11.328	2e-10	2.2e-09	11.06	12.2	Npc2a	CG7291	Niemann-Pick type C-2a
FBgn0035091	1640501_at	-0.982	8.885	2e-10	2.2e-09	9.12	8.13	CG3829	CG3829	NA
FBgn0037408	1628982_at	1.133	5.493	2e-10	2.2e-09	5.14	6.27	NPFR1	CG1147	neuropeptide F receptor
FBgn0011660	1641382_at	-1.563	6.714	2e-10	2.2e-09	7.26	5.69	Pms2	CG8169	Pms2
FBgn0000826	1638329_at	-2.24	6.646	2e-10	2.2e-09	7.45	5.21	png	CG11420	pan gu
FBgn0031878	1630870_s_at	-1.554	7.12	2e-10	2.2e-09	7.72	6.16	sip2	CG9188	septin interacting protein 2
FBgn0000242	1624699_s_at	-1.523	7.378	2e-10	2.2e-09	7.9	6.38	Bx	CG6500	Beadex
FBgn0027611	1635125_a_at	-1.621	10.998	2e-10	2.2e-09	11.41	9.79	CG6206	CG6206	NA
NA	1632932_a_at	1.667	8.096	2e-10	2.2e-09	7.61	9.28	NA	NA	NA
NA	1635927_at	0.638	7.363	2e-10	2.2e-09	7.11	7.75	NA	NA	NA
FBgn0038327	1627794_a_at	0.97	7.773	2.1e-10	2.3e-09	7.41	8.38	Trax	CG5063	Translin associated factor X
FBgn0004456	1634290_a_at	1.385	7.346	2.1e-10	2.3e-09	6.95	8.33	mew	CG1771	multiple edematous wings
FBgn0004598	1640470_s_at	-0.999	8.71	2.1e-10	2.3e-09	9.05	8.05	Fur2	CG18734	Furin 2
FBgn0034290	1640400_at	-1.735	11.627	2.1e-10	2.3e-09	12.17	10.43	CG5773	CG5773	NA
FBgn0032465	1633389_at	0.942	9.086	2.1e-10	2.3e-09	8.78	9.72	CG12404	CG12404	NA
FBgn0050055	1629821_at	-1.131	8.365	2.1e-10	2.3e-09	8.76	7.63	CG30055	CG30055	NA
FBgn0050373	1639646_at	0.743	7.779	2.1e-10	2.3e-09	7.52	8.27	CG30373	CG30373	NA
FBgn0003943	1624230_s_at	0.658	12.419	2.1e-10	2.3e-09	12.22	12.88	Ubi-p63E	CG11624	Ubiquitin-63E
FBgn0030833	1628853_at	-1.274	7.613	2.1e-10	2.3e-09	8.1	6.82	CG8915	CG8915	NA
FBgn0032731	1627515_at	0.95	9.724	2.1e-10	2.3e-09	9.38	10.33	CG10641	CG10641	NA
FBgn0017551	1631034_at	-1.745	7.759	2.1e-10	2.3e-09	8.4	6.66	Rca1	CG10800	Regulator of cyclin A1
FBgn0083972	1626759_at	-1.634	8.287	2.1e-10	2.3e-09	8.97	7.34	CG34136	CG34136	NA
FBgn0034512	1640144_at	1.171	12.607	2.2e-10	2.3e-09	12.27	13.44	CG18067	CG18067	NA
FBgn0051898	1628425_at	-1.63	6.224	2.2e-10	2.4e-09	6.99	5.36	CG31898	CG31898	NA
FBgn0025681	1640924_a_at	1.047	8.895	2.2e-10	2.4e-09	8.59	9.63	CG3558	CG3558	NA
FBgn0032822	1627627_at	0.626	7.703	2.2e-10	2.4e-09	7.4	8.02	CG10466	CG10466	NA
FBgn0011556	1635815_at	-1.944	10.32	2.2e-10	2.4e-09	10.73	8.79	zetaTry	CG12387	zetaTrypsin
FBgn0039634	1626972_at	0.894	9.097	2.2e-10	2.4e-09	8.78	9.67	CG11874	CG11874	NA
FBgn0041789	1626624_s_at	0.784	8.27	2.2e-10	2.4e-09	8.12	8.9	Pax	CG31794	Paxillin
FBgn0039666	1638812_at	3.352	5.572	2.3e-10	2.4e-09	4.48	7.83	CG11501	CG11501	NA
FBgn0039052	1632228_at	-1.429	8.655	2.3e-10	2.4e-09	9.05	7.62	CG6733	CG6733	NA
FBgn0039873	1633425_at	-1.49	10.519	2.3e-10	2.5e-09	10.65	9.16	Smvt	CG2191	Sodium-dependent multivitamin transporter
FBgn0036662	1631245_s_at	0.693	8.634	2.3e-10	2.5e-09	8.31	9	CG9706	CG9706	NA
FBgn0028527	1627961_a_at	1.054	7.541	2.3e-10	2.5e-09	7.22	8.28	CG18507	CG18507	NA
FBgn0028691	1626488_s_at	0.56	10.915	2.3e-10	2.5e-09	10.79	11.35	Rpn9	CG10230	Rpn9
FBgn0028419	1624305_at	0.7	11.57	2.3e-10	2.5e-09	11.31	12.01	Kr-h2	CG9159	Kruppel homolog 2
FBgn0030688	1629007_at	-1.063	11.863	2.3e-10	2.5e-09	12.17	11.11	CG8952	CG8952	NA
NA	1624619_s_at	2.285	4.471	2.3e-10	2.4e-09	3.69	5.97	NA	NA	NA
FBgn0086785	1628278_at	0.752	8.294	2.4e-10	2.5e-09	8.09	8.84	Vps36	CG10711	Vacuolar protein sorting 36
FBgn0033188	1638498_s_at	0.701	11.966	2.4e-10	2.6e-09	11.92	12.62	CG1600	CG1600	NA
FBgn0015372	1624618_at	1	8.9	2.4e-10	2.6e-09	8.63	9.63	chrw	CG3870	chrowded
FBgn0053111	1630807_at	1.749	8.43	2.5e-10	2.6e-09	7.94	9.69	CG33111	CG33111	NA
FBgn0038195	1636708_at	0.701	10.954	2.5e-10	2.6e-09	10.74	11.44	CG3061	CG3061	NA
FBgn0033529	1622941_at	0.477	10.494	2.5e-10	2.7e-09	10.36	10.83	CG17765	CG17765	NA
FBgn0031304	1641341_at	0.731	9.435	2.5e-10	2.7e-09	9.18	9.91	CG4552	CG4552	NA
FBgn0036732	1625041_at	-1.243	7.58	2.5e-10	2.7e-09	8.03	6.79	Oatp74D	CG7571	Organic anion transporting polypeptide 74D
FBgn0032793	1627330_at	1.028	7.674	2.5e-10	2.7e-09	7.35	8.38	CG10189	CG10189	NA
FBgn0085415	1624512_at	1.744	7.548	2.5e-10	2.6e-09	7.03	8.78	CG34386	CG34386	NA
FBgn0002567	1632119_s_at	-0.865	10.016	2.6e-10	2.7e-09	10.13	9.27	ltd	CG8024	lightoid
FBgn0035411	1626237_at	-1.023	9.383	2.6e-10	2.7e-09	9.78	8.76	CG12734	CG12734	Girdin
FBgn0033191	1639416_at	0.608	9.786	2.6e-10	2.7e-09	9.58	10.19	CG1598	CG1598	NA
FBgn0031896	1636718_s_at	-0.519	9.565	2.6e-10	2.7e-09	9.79	9.28	CG4502	CG4502	NA
FBgn0052667	1634697_at	-1.494	11.585	2.6e-10	2.8e-09	11.93	10.44	CG32667	CG32667	NA
FBgn0024985	1624881_at	1.137	8.254	2.6e-10	2.8e-09	7.98	9.11	CG11448	CG11448	NA
FBgn0040928	1628199_at	-1.098	7.147	2.6e-10	2.8e-09	7.6	6.5	CG15345	CG15345	NA
NA	1638393_at	1.318	4.136	2.6e-10	2.7e-09	3.74	5.06	NA	NA	NA
FBgn0022700	1631472_at	2.188	9.079	2.6e-10	2.8e-09	8.72	10.9	Cht4	CG3986	NA
FBgn0021856	1624331_at	0.473	9.352	2.7e-10	2.8e-09	9.16	9.64	l(2)k14505	CG8674	lethal (2) k14505
FBgn0035539	1631441_s_at	1.156	5.514	2.7e-10	2.9e-09	5.09	6.24	CG7447	CG7447	slowdown
FBgn0052758	1637506_at	0.931	8.712	2.7e-10	2.9e-09	8.41	9.34	CG32758	CG32758	NA
FBgn0000567	1635639_a_at	1.301	7.895	2.8e-10	2.9e-09	7.48	8.78	Eip74EF	CG32180	Ecdysone-induced protein 74EF
FBgn0037963	1641575_at	-1.135	8.023	2.8e-10	2.9e-09	8.43	7.3	Cad87A	CG6977	Cad87A
FBgn0039402	1623625_at	1.13	10.145	2.8e-10	2.9e-09	9.87	11	CG14542	CG14542	vps2
FBgn0034367	1638795_at	0.738	7.937	2.8e-10	2.9e-09	7.71	8.45	sec6	CG5341	sec6
FBgn0004649	1626299_at	-3.919	7.645	2.8e-10	2.9e-09	8.94	5.02	yl	CG1372	yolkless
FBgn0016762	1625019_at	0.732	7.435	2.8e-10	2.9e-09	7.2	7.93	angel	CG12273	angel
FBgn0020416	1633237_at	1.232	10.797	2.8e-10	2.9e-09	10.36	11.6	Idgf1	CG4472	Imaginal disc growth factor 1
FBgn0013548	1632914_at	-1.299	7.449	2.8e-10	2.9e-09	7.92	6.62	l(2)dtl	CG11295	lethal-(2)-denticleless
FBgn0036666	1640247_at	0.73	10.261	2.8e-10	2.9e-09	9.93	10.66	TSG101	CG9712	tumor suppressor protein 101
FBgn0031643	1633622_at	1.455	9.131	2.8e-10	2.9e-09	8.73	10.19	CG3008	CG3008	NA
NA	1639694_s_at	1.604	10.565	2.8e-10	2.9e-09	10.09	11.69	NA	NA	NA
NA	1634187_x_at	2.225	8.471	2.8e-10	2.9e-09	7.94	10.17	NA	NA	NA
NA	1626044_at	-1.398	8.518	2.8e-10	2.9e-09	9.06	7.66	NA	NA	NA
FBgn0034501	1638183_at	-0.979	9.683	2.9e-10	2.9e-09	10	9.03	CG13868	CG13868	NA
FBgn0027620	1637574_at	-1.28	8.759	2.9e-10	2.9e-09	9.21	7.93	Acf1	CG1966	ATP-dependent chromatin assembly factor large subunit
FBgn0085257	1640230_at	0.81	9.481	2.9e-10	3e-09	9.17	9.98	CG34228	CG34228	NA
FBgn0036740	1638501_at	1.115	10.885	2.9e-10	3e-09	10.57	11.68	CG6259	CG6259	NA
FBgn0028968	1625155_a_at	0.631	10.31	2.9e-10	3e-09	10.09	10.72	gammaCop	CG1528	gamma-coatomer protein
FBgn0036702	1634899_a_at	0.95	10.024	2.9e-10	3e-09	9.72	10.67	CG6512	CG6512	NA
FBgn0031537	1629189_at	0.782	7.731	3e-10	3e-09	7.44	8.23	sec5	CG8843	sec5
FBgn0008635	1626340_at	0.824	9.888	3e-10	3e-09	9.58	10.41	betaCop	CG6223	beta-coatomer protein
FBgn0002962	1632713_at	-5.943	8.633	3e-10	3e-09	10.66	4.72	nos	CG5637	nanos
FBgn0036615	1641223_at	0.804	8.249	3e-10	3.1e-09	7.99	8.79	CG4933	CG4933	NA
FBgn0028579	1641378_at	-0.577	8.072	3e-10	3.1e-09	8.29	7.72	phtf	CG3268	phtf
FBgn0036191	1638811_at	-1.542	8.105	3e-10	3.1e-09	8.48	6.94	Sug	CG7334	Sug
FBgn0085415	1628010_at	1.784	5.279	3e-10	3e-09	4.75	6.53	CG34386	CG34386	NA
FBgn0004908	1641687_at	0.72	8.508	3.1e-10	3.1e-09	8.3	9.02	Arf84F	CG7435	ADP ribosylation factor 84F
FBgn0034249	1625119_at	-1.658	5.764	3.1e-10	3.1e-09	6.4	4.74	RhoGAP54D	CG6477	RhoGAP54D
FBgn0037539	1623673_at	0.716	7.579	3.1e-10	3.1e-09	7.39	8.1	CG10435	CG10435	NA
FBgn0032886	1623571_a_at	-0.892	7.153	3.1e-10	3.1e-09	7.51	6.62	CG9328	CG9328	NA
FBgn0025820	1632954_at	0.522	8.364	3.1e-10	3.1e-09	8.18	8.7	JTBR	CG1935	JTBR
FBgn0040827	1634002_at	-0.704	13.762	3.1e-10	3.1e-09	14.01	13.31	CG13315	CG13315	NA
FBgn0023525	1623743_at	0.806	8.133	3.2e-10	3.2e-09	7.85	8.65	CG3191	CG3191	NA
FBgn0031701	1623635_at	5.24	8.149	3.2e-10	3.3e-09	6.73	11.97	TotM	CG14027	Turandot M
FBgn0035248	1639600_at	0.799	8.597	3.2e-10	3.3e-09	8.26	9.06	CG13919	CG13919	NA
FBgn0001114	1630515_s_at	-1.376	10.136	3.2e-10	3.3e-09	10.53	9.15	Glt	CG9280	Glutactin
FBgn0052251	1633138_at	-1.107	6.116	3.2e-10	3.2e-09	6.47	5.36	CG32251	CG32251	NA
FBgn0051036	1633971_at	2.602	4.886	3.2e-10	3.2e-09	4	6.6	CG31036	CG31036	NA
FBgn0032836	1638675_at	-1.111	11.397	3.3e-10	3.3e-09	11.69	10.58	CG10680	CG10680	NA
FBgn0029854	1638923_at	0.698	10.368	3.3e-10	3.3e-09	10.11	10.81	CG3566	CG3566	NA
FBgn0051549	1629614_at	0.645	10.024	3.3e-10	3.3e-09	9.81	10.45	CG31549	CG31549	NA
FBgn0035936	1635267_s_at	-1.586	7.075	3.3e-10	3.3e-09	7.66	6.07	Tsp66E	CG4999	Tetraspanin 66E
FBgn0020306	1633331_at	-0.795	8.89	3.3e-10	3.3e-09	9.16	8.36	dom	CG9696	domino
FBgn0028479	1635745_a_at	-0.772	11.552	3.3e-10	3.3e-09	11.79	11.01	CG4389	CG4389	NA
NA	1637532_s_at	0.768	10.304	3.3e-10	3.3e-09	10	10.77	NA	NA	NA
FBgn0015522	1628075_at	-1.01	8.77	3.4e-10	3.3e-09	9.07	8.06	olf186-M	CG14489	olf186-M
FBgn0030683	1637066_at	-0.929	7.045	3.4e-10	3.3e-09	7.42	6.49	CG8239	CG8239	NA
FBgn0002778	1628947_s_at	-0.776	9.032	3.4e-10	3.4e-09	9.2	8.42	mnd	CG3297	minidiscs
FBgn0034885	1626308_s_at	-0.815	10.232	3.4e-10	3.4e-09	10.38	9.56	CG4019	CG4019	NA
FBgn0250843	1631376_at	0.588	11.793	3.4e-10	3.4e-09	11.7	12.29	Pros35	CG4904	Proteasome 35kD subunit
FBgn0020388	1627246_at	0.917	9.066	3.4e-10	3.4e-09	8.77	9.69	Pcaf	CG4107	Pcaf
FBgn0028688	1633594_at	0.773	10.568	3.5e-10	3.4e-09	10.35	11.12	Rpn7	CG5378	Rpn7
FBgn0053296	1627994_at	1.8	4.446	3.5e-10	3.4e-09	3.79	5.59	CG33296	CG33296	NA
FBgn0030799	1634788_at	1.345	7.884	3.5e-10	3.4e-09	7.48	8.82	CG4872	CG4872	NA
FBgn0034398	1627634_at	0.5	12.766	3.5e-10	3.4e-09	12.61	13.11	CG15098	CG15098	NA
FBgn0024833	1623631_at	0.607	9.254	3.5e-10	3.5e-09	9.07	9.67	AP-47	CG9388	AP-47
FBgn0030028	1641082_at	-1.978	6.955	3.5e-10	3.5e-09	7.73	5.75	Corp	CG10965	Companion of reaper
FBgn0250746	1630851_s_at	0.54	11.969	3.6e-10	3.5e-09	11.81	12.35	Prosbeta7	CG12000	Proteasome beta7 subunit
FBgn0010313	1636864_at	-0.913	10.143	3.6e-10	3.5e-09	10.44	9.53	corto	CG2530	corto
FBgn0020248	1641652_a_at	-3.051	6.317	3.6e-10	3.5e-09	7.3	4.25	stet	CG33166	stem cell tumor
FBgn0035983	1626113_at	0.86	9.307	3.6e-10	3.5e-09	9.12	9.98	CG4080	CG4080	NA
FBgn0002466	1637424_at	-1.65	6.783	3.6e-10	3.5e-09	7.44	5.79	sti	CG10522	sticky
FBgn0053329	1626116_at	1.294	6.452	3.6e-10	3.6e-09	5.92	7.21	Sp212	CG33329	Serine-peptidase 212
FBgn0039025	1639202_a_at	0.598	8.236	3.6e-10	3.6e-09	8.03	8.63	CG7023	CG7023	NA
FBgn0037515	1626272_s_at	0.709	8.628	3.6e-10	3.6e-09	8.36	9.06	Sp7	CG3066	Serine protease 7
NA	1632699_s_at	-1.464	7.505	3.6e-10	3.5e-09	7.92	6.45	NA	NA	NA
FBgn0011706	1624859_at	2.158	4.37	3.7e-10	3.6e-09	3.59	5.75	rpr	CG4319	reaper
FBgn0011509	1630713_at	0.566	8.725	3.7e-10	3.6e-09	8.53	9.1	SrpRbeta	CG33162	Signal recognition particle receptor beta
FBgn0050342	1638997_at	0.57	8.288	3.7e-10	3.6e-09	8.13	8.7	Prp38	CG30342	pre-mRNA processing factor 38
FBgn0035495	1629907_at	1.808	7.752	3.7e-10	3.6e-09	7.02	8.83	CG14989	CG14989	NA
FBgn0039925	1629874_at	1.726	5.589	3.7e-10	3.6e-09	5.11	6.83	Kif3C	CG17461	Kif3C
FBgn0039840	1638649_at	-1.292	7.141	3.7e-10	3.6e-09	6.86	5.57	CG11340	CG11340	NA
FBgn0002781	1634258_at	-0.909	7.72	3.8e-10	3.7e-09	8.06	7.15	mod(mdg4)	CG32491	modifier of mdg4
FBgn0034400	1624237_at	0.949	9.205	3.8e-10	3.7e-09	8.95	9.9	CG15099	CG15099	NA
FBgn0050085	1626755_at	-1.649	7.209	3.8e-10	3.7e-09	7.83	6.18	CG30085	CG30085	NA
FBgn0020647	1637517_s_at	0.802	8.033	3.9e-10	3.7e-09	7.8	8.61	KrT95D	CG5405	Krueppel target at 95D
FBgn0051342	1632567_at	-0.927	9.13	3.9e-10	3.8e-09	9.51	8.58	CG31342	CG31342	NA
FBgn0036573	1630543_at	0.842	8.484	4e-10	3.8e-09	8.18	9.02	CG5161	CG5161	NA
FBgn0015391	1635123_at	-1.39	7.295	4e-10	3.8e-09	7.82	6.43	glu	CG11397	gluon
FBgn0002542	1634695_at	-1.503	7.976	4e-10	3.9e-09	8.53	7.02	lds	CG2684	lodestar
FBgn0085402	1635126_a_at	0.679	9.198	4e-10	3.9e-09	9.05	9.73	Ect4	CG34373	NA
FBgn0028915	1635161_at	1.193	9.086	4e-10	3.9e-09	8.62	9.81	CG7532	CG7532	NA
FBgn0026616	1632936_at	-1.96	6.068	4.1e-10	3.9e-09	6.82	4.86	alpha-Man-IIb	CG4606	alpha-Man-IIb
FBgn0030351	1636902_at	1.1	8.427	4.1e-10	3.9e-09	8.05	9.15	CG1840	CG1840	NA
FBgn0052099	1633677_at	1.038	7.179	4.1e-10	3.9e-09	6.79	7.83	eap	CG32099	ebony activating protein
FBgn0032297	1633795_a_at	-1.042	10.586	4.1e-10	3.9e-09	10.92	9.88	CG17124	CG17124	NA
FBgn0085282	1628992_at	1.043	7.362	4.1e-10	4e-09	6.94	7.98	CG34253	CG34253	NA
FBgn0053281	1634418_at	0.966	8.999	4.1e-10	4e-09	8.34	9.31	CG33281	CG33281	NA
FBgn0033635	1625950_a_at	-0.75	11.022	4.2e-10	4e-09	11.28	10.53	CG7777	CG7777	NA
FBgn0027087	1631877_a_at	0.573	9.209	4.2e-10	4e-09	9.02	9.6	Aats-his	CG6335	Histidyl-tRNA synthetase
FBgn0033088	1634541_a_at	0.539	8.074	4.2e-10	4e-09	7.9	8.44	CG3271	CG3271	NA
FBgn0033170	1631228_a_at	-2.113	8.874	4.2e-10	4e-09	9.52	7.41	sPLA2	CG11124	secretory Phospholipase A2
FBgn0033584	1637758_at	-0.912	7.535	4.2e-10	4e-09	7.86	6.95	CG7737	CG7737	NA
FBgn0015765	1636173_s_at	0.918	10.063	4.2e-10	4e-09	9.84	10.76	Mpk2	CG5475	Mpk2
FBgn0036262	1639424_at	-1.432	9.366	4.2e-10	4e-09	9.81	8.38	CG6910	CG6910	NA
FBgn0002641	1631688_at	0.784	8.506	4.2e-10	4e-09	8.17	8.95	mal	CG1692	maroon-like
FBgn0053469	1631521_at	2.171	7.667	4.3e-10	4e-09	7.16	9.33	CG33469	CG33469	NA
FBgn0003268	1632559_at	-1.139	6.165	4.3e-10	4e-09	6.57	5.43	rod	CG1569	rough deal
FBgn0038199	1629448_at	2.281	7.747	4.3e-10	4e-09	7.16	9.44	CG14358	CG14358	CCHamide-1
FBgn0000927	1639097_at	-2.856	7.877	4.3e-10	4.1e-09	8.84	5.99	fs(1)Ya	CG2707	female sterile (1) Young arrest
FBgn0030060	1637125_at	1.222	9.708	4.3e-10	4.1e-09	9.28	10.51	CG2004	CG2004	NA
FBgn0033603	1636853_at	-1.078	6.196	4.3e-10	4.1e-09	6.51	5.43	Cpr47Ef	CG13214	Cuticular protein 47Ef
FBgn0024293	1635183_at	-1.073	12.041	4.3e-10	4.1e-09	12.32	11.25	Spn43Ab	CG1865	Serine protease inhibitor 43Ab
FBgn0033391	1633840_a_at	-0.866	9.62	4.4e-10	4.1e-09	9.76	8.89	CG8026	CG8026	NA
FBgn0035906	1627845_at	0.517	11.238	4.4e-10	4.1e-09	11.1	11.62	CG6673	CG6673	NA
FBgn0001230	1638872_at	1.456	6.912	4.4e-10	4.2e-09	6.41	7.87	Hsp68	CG5436	Heat shock protein 68
FBgn0052284	1639457_at	2.232	9.876	4.4e-10	4.1e-09	9.6	11.83	CG32284	CG32284	NA
FBgn0005586	1625838_at	1.907	5.5	4.5e-10	4.2e-09	5	6.91	Rab3	CG7576	Rab-protein 3
FBgn0036288	1630113_at	1.302	8.093	4.5e-10	4.2e-09	7.77	9.07	CG10660	CG10660	NA
FBgn0033528	1632396_at	0.643	8.772	4.5e-10	4.2e-09	8.6	9.24	trsn	CG11761	translin
FBgn0025885	1635848_at	0.89	9.185	4.5e-10	4.2e-09	8.82	9.71	Inos	CG11143	Inos
FBgn0033134	1635370_at	1.316	9.855	4.5e-10	4.2e-09	9.53	10.84	Tsp42El	CG12840	Tetraspanin 42El
FBgn0032354	1628321_at	-1.165	7.474	4.5e-10	4.2e-09	7.95	6.79	CG4788	CG4788	NA
FBgn0032981	1640207_at	-2.495	6.462	4.6e-10	4.3e-09	7.17	4.67	CG3635	CG3635	NA
FBgn0023143	1640089_at	0.851	10.729	4.7e-10	4.4e-09	10.5	11.35	Uba1	CG1782	Ubiquitin activating enzyme 1
FBgn0035673	1632874_at	1.471	10.03	4.7e-10	4.4e-09	9.02	10.49	CG6602	CG6602	NA
FBgn0032705	1632875_at	-1.539	7.156	4.7e-10	4.4e-09	7.73	6.19	Grip71	CG10346	Grip71
FBgn0052313	1640961_at	1.902	7.145	4.7e-10	4.4e-09	6.34	8.24	CG32313	CG32313	NA
FBgn0011754	1623842_a_at	0.566	10.748	4.8e-10	4.4e-09	10.53	11.09	PhKgamma	CG1830	Phosphorylase kinase gamma
FBgn0037890	1624488_a_at	-0.623	11.867	4.8e-10	4.4e-09	12.01	11.38	CG17734	CG17734	NA
FBgn0039760	1633631_at	-1.533	9.573	4.8e-10	4.4e-09	9.92	8.39	CG9682	CG9682	NA
FBgn0031801	1623706_at	1.114	10.178	4.8e-10	4.4e-09	9.72	10.83	CG9498	CG9498	NA
FBgn0002878	1635302_at	-1.46	6.247	4.8e-10	4.4e-09	6.76	5.3	mus101	CG11156	mutagen-sensitive 101
FBgn0046322	1631486_at	1.732	9.303	4.9e-10	4.5e-09	8.85	10.58	p38c	CG33338	p38c
FBgn0035251	1626276_at	0.771	9.699	4.9e-10	4.5e-09	9.49	10.26	CG7967	CG7967	NA
FBgn0037762	1632453_at	-0.681	12.207	4.9e-10	4.5e-09	12.43	11.75	eloF	CG16905	elongase F
FBgn0026417	1627856_at	0.624	7.34	4.9e-10	4.5e-09	7.2	7.83	Hus1-like	CG2525	Hus1-like
FBgn0034399	1636505_at	0.914	11.168	4.9e-10	4.5e-09	10.97	11.88	CG15083	CG15083	NA
FBgn0035708	1624347_s_at	2.27	5.325	4.9e-10	4.5e-09	4.67	6.94	CG8398	CG8398	NA
FBgn0028388	1629012_at	0.831	11.461	4.9e-10	4.5e-09	11.27	12.1	capt	CG33979	NA
NA	1628008_a_at	0.769	12.102	4.9e-10	4.5e-09	11.87	12.63	NA	NA	NA
FBgn0001285	1639364_at	-3.219	10.445	5e-10	4.5e-09	11.48	8.26	Jon44E	CG8579	Jonah 44E
FBgn0028381	1622960_at	1.316	11.857	5e-10	4.6e-09	11.54	12.85	decay	CG14902	death executioner caspase related to Apopain/Yama
FBgn0010097	1639192_at	-1.768	7.05	5e-10	4.6e-09	7.67	5.9	gammaTub37C	CG17566	gamma-Tubulin at 37C
FBgn0002856	1624292_a_at	1.578	3.535	5e-10	4.5e-09	3.02	4.6	Acp26Ab	CG9024	NA
NA	1627121_s_at	0.824	4.793	5e-10	4.6e-09	4.59	5.41	NA	NA	NA
FBgn0050035	1627582_a_at	-0.845	11.553	5.1e-10	4.6e-09	11.86	11.02	CG30035	CG30035	Trehalose transporter 1-1
FBgn0036298	1638994_at	0.957	10.549	5.1e-10	4.6e-09	10.29	11.25	CG10627	CG10627	NA
FBgn0031034	1634239_at	-3.07	9.032	5.1e-10	4.7e-09	10.14	7.07	CG14205	CG14205	NA
FBgn0028546	1629423_at	0.536	9.635	5.2e-10	4.7e-09	9.49	10.03	ics	CG9031	icarus
FBgn0038755	1636347_at	-0.732	7.259	5.3e-10	4.8e-09	7.52	6.79	Hs6st	CG4451	Heparan sulfate 6-O-sulfotransferase
FBgn0001202	1628673_at	0.598	9.039	5.3e-10	4.8e-09	8.85	9.45	hk	CG10653	hook
FBgn0001308	1641312_at	0.569	9.916	5.3e-10	4.8e-09	9.77	10.34	Khc	CG7765	Kinesin heavy chain
FBgn0029092	1638738_s_at	-1.107	10.272	5.3e-10	4.8e-09	10.66	9.55	ced-6	CG11804	ced-6
FBgn0031461	1626766_s_at	-1.852	9.299	5.3e-10	4.8e-09	9.81	7.96	daw	CG16987	dawdle
FBgn0032656	1630550_a_at	0.874	8.436	5.4e-10	4.9e-09	8.19	9.07	CG5674	CG5674	NA
FBgn0025458	1641015_at	-1.554	6.343	5.4e-10	4.9e-09	6.93	5.37	BubR1	CG7838	Bub1-related kinase
FBgn0042102	1637062_at	0.949	9.655	5.4e-10	4.9e-09	9.28	10.23	CG18745	CG18745	NA
FBgn0024273	1625470_s_at	1.032	7.951	5.5e-10	4.9e-09	7.66	8.69	WASp	CG1520	WASp
FBgn0035734	1641741_a_at	-1.263	6.338	5.5e-10	4.9e-09	6.57	5.31	CG14823	CG14823	NA
FBgn0031498	1625081_at	0.847	7.631	5.5e-10	4.9e-09	7.35	8.2	CG17260	CG17260	NA
FBgn0028919	1629159_at	0.877	7.588	5.6e-10	5e-09	7.31	8.18	CG16865	CG16865	NA
FBgn0026378	1631388_at	0.667	8.425	5.6e-10	5e-09	8.27	8.93	Rep	CG8432	Rab escort protein
FBgn0051380	1626164_at	-0.915	7.316	5.6e-10	5e-09	7.44	6.53	CG31380	CG31380	NA
FBgn0035476	1635410_at	1.22	9.342	5.6e-10	5e-09	9.26	10.48	CG12766	CG12766	NA
FBgn0031146	1637516_at	1.578	5.563	5.6e-10	5e-09	5.16	6.74	CG15449	CG15449	NA
FBgn0032449	1628221_at	-1.389	6.411	5.6e-10	5e-09	6.86	5.47	CG17036	CG17036	NA
NA	1632762_s_at	1.087	7.064	5.6e-10	5e-09	6.66	7.74	NA	NA	NA
FBgn0034312	1639621_at	2.091	8.918	5.7e-10	5.1e-09	8.29	10.38	CG10916	CG10916	NA
FBgn0015591	1632752_at	1.559	9.528	5.7e-10	5.1e-09	9.01	10.57	Ast	CG13633	Allatostatin
FBgn0038128	1628065_at	0.797	6.91	5.7e-10	5.1e-09	6.66	7.46	Ravus	CG15889	Ravus
FBgn0033669	1626981_s_at	0.634	10.071	5.7e-10	5.1e-09	9.89	10.52	CG8979	CG8979	NA
FBgn0037975	1631805_at	3.066	6.478	5.7e-10	5.1e-09	4.51	7.58	CG3397	CG3397	NA
FBgn0000083	1640324_at	1.177	11.354	5.8e-10	5.2e-09	11.02	12.2	AnnIX	CG5730	Annexin IX
FBgn0030803	1634866_at	-1.445	7.188	5.8e-10	5.2e-09	7.76	6.31	CG4880	CG4880	NA
FBgn0035805	1624837_at	0.658	8.871	5.8e-10	5.2e-09	8.64	9.3	CG7506	CG7506	NA
NA	1639374_s_at	-1.185	12.196	5.8e-10	5.1e-09	12.76	11.58	NA	NA	NA
FBgn0025725	1632109_s_at	0.871	10.272	5.9e-10	5.2e-09	9.94	10.81	alphaCop	CG7961	alpha-coatomer protein
FBgn0036547	1639353_at	-1.09	8.894	5.9e-10	5.3e-09	9.2	8.11	CG17032	CG17032	NA
FBgn0031449	1639286_s_at	-0.997	10.193	6e-10	5.3e-09	10.44	9.44	CG31689	CG31689	NA
FBgn0020445	1628224_a_at	-1.312	7.848	6e-10	5.3e-09	8.34	7.02	E23	CG3327	Early gene at 23
FBgn0031653	1624506_at	-3.998	12.224	6e-10	5.3e-09	13.4	9.4	Jon25Biii	CG8871	Jonah 25Biii
FBgn0015283	1635974_at	0.681	10.909	6e-10	5.3e-09	10.71	11.39	Pros54	CG7619	Proteasome 54kD subunit
FBgn0031252	1633171_at	-1.481	6.253	6.1e-10	5.4e-09	6.85	5.36	CG13690	CG13690	NA
NA	1625986_at	0.918	7.474	6.1e-10	5.4e-09	7.1	8.02	NA	NA	NA
FBgn0002968	1626001_at	0.941	6.566	6.2e-10	5.4e-09	6.27	7.21	Nrg	CG1634	Neuroglian
FBgn0003495	1641068_a_at	1.176	8.837	6.2e-10	5.4e-09	8.52	9.7	spz	CG6134	spatzle
FBgn0033153	1625139_at	1.646	6.839	6.2e-10	5.4e-09	6.41	8.06	Gadd45	CG11086	Gadd45
FBgn0038631	1630831_at	2.5	9.619	6.2e-10	5.4e-09	8.96	11.46	CG7695	CG7695	NA
FBgn0038396	1626514_at	0.826	7.835	6.2e-10	5.4e-09	7.56	8.38	CG5013	CG5013	NA
FBgn0259481	1640774_a_at	1.631	5.245	6.3e-10	5.5e-09	4.72	6.35	Mob2	CG11711	Mob2
FBgn0051663	1623276_at	-0.93	7.744	6.3e-10	5.5e-09	8	7.07	CG31663	CG31663	NA
FBgn0033205	1634019_at	2.321	10.767	6.3e-10	5.5e-09	10.16	12.49	CG2064	CG2064	NA
FBgn0259225	1625724_at	1.25	4.496	6.3e-10	5.5e-09	4.13	5.38	Pde1c	CG42325	Phosphodiesterase 1c
NA	1626257_at	-1.848	5.388	6.3e-10	5.5e-09	6.11	4.26	NA	NA	NA
FBgn0052638	1634787_at	0.556	9.762	6.4e-10	5.6e-09	9.67	10.23	CG32638	CG32638	NA
FBgn0000063	1637781_at	-1.549	4.972	6.4e-10	5.6e-09	5.47	3.92	ald	CG7643	altered disjunction
FBgn0038257	1635450_a_at	-1.72	10.101	6.4e-10	5.6e-09	10.81	9.09	smp-30	CG7390	Senescence marker protein-30
FBgn0026567	1634887_at	0.664	11.457	6.4e-10	5.6e-09	11.22	11.88	Spase18-21	CG2358	NA
FBgn0020622	1622909_at	1.338	10.421	6.5e-10	5.6e-09	10.07	11.41	Pi3K21B	CG2699	Pi3K21B
FBgn0037703	1636540_at	1.404	6.834	6.5e-10	5.6e-09	6.22	7.63	CG8165	CG8165	JmjC domain-containing histone demethylase 2
FBgn0030749	1625145_a_at	1.367	9.753	6.5e-10	5.6e-09	9.39	10.75	Anxb11	CG9968	Annexin B11
FBgn0030734	1624499_s_at	0.46	10.695	6.5e-10	5.6e-09	10.49	10.95	CG9911	CG9911	NA
FBgn0037339	1627996_a_at	0.847	9.801	6.5e-10	5.7e-09	9.58	10.43	Pi4KIIalpha	CG2929	Pi4KIIalpha
FBgn0051140	1634447_at	0.956	7.169	6.5e-10	5.7e-09	6.87	7.83	CG31140	CG31140	NA
FBgn0033845	1637994_at	-1.888	6.909	6.5e-10	5.7e-09	7.63	5.74	mars	CG17064	NA
FBgn0036980	1624530_at	-0.544	9.638	6.7e-10	5.7e-09	9.83	9.28	RhoBTB	CG5701	RhoBTB
FBgn0030474	1635052_a_at	0.584	7.772	6.7e-10	5.7e-09	7.6	8.19	CG15747	CG15747	NA
FBgn0032955	1626079_a_at	-0.91	9.707	6.7e-10	5.7e-09	9.99	9.08	CG2201	CG2201	NA
FBgn0034854	1623264_at	0.843	8.765	6.7e-10	5.7e-09	8.48	9.33	CG3493	CG3493	NA
FBgn0031050	1636320_at	0.656	8.264	6.7e-10	5.8e-09	8.06	8.72	Arp11	CG12235	Arp11
FBgn0036815	1625792_s_at	-1.931	8.529	6.7e-10	5.8e-09	9.3	7.36	l(3)neo26	CG6874	HP1-HOAP-interacting protein
FBgn0032055	1630532_at	-4.561	8.833	6.7e-10	5.8e-09	10.82	6.26	CG13091	CG13091	NA
NA	1624819_s_at	-2.261	8.617	6.7e-10	5.8e-09	9.79	7.52	NA	NA	NA
FBgn0032036	1631237_s_at	0.67	9.194	6.8e-10	5.8e-09	9.06	9.73	CG13384	CG13384	NA
FBgn0038147	1634960_at	1.567	10.667	6.8e-10	5.8e-09	10.09	11.66	CG14375	CG14375	CCHamide-2
FBgn0025335	1638874_at	0.505	10.382	6.8e-10	5.8e-09	10.22	10.72	CG4585	CG4585	NA
FBgn0039520	1637732_at	-1.77	5.628	6.8e-10	5.8e-09	6.14	4.37	Gr98a	CG13976	NA
FBgn0041713	1625405_at	1.221	8.351	6.9e-10	5.9e-09	7.95	9.17	yellow-c	CG4182	yellow-c
FBgn0261285	1624604_a_at	-1.138	6.805	7e-10	5.9e-09	7.18	6.04	Ppcs	CG5629	Phosphopantothenoylcysteine synthetase
FBgn0034346	1632403_at	0.874	7.734	7e-10	6e-09	7.54	8.41	CG12263	CG12263	NA
FBgn0003475	1635630_a_at	-0.652	8.188	7e-10	6e-09	8.4	7.75	spir	CG10076	spire
FBgn0039538	1635219_at	0.809	7.785	7e-10	6e-09	7.45	8.26	CG12883	CG12883	NA
NA	1633810_at	0.674	7.81	7e-10	6e-09	7.57	8.25	NA	NA	NA
FBgn0037872	1636103_a_at	-0.68	10.081	7e-10	5.9e-09	10.26	9.58	nocturnin	CG31299	NA
FBgn0029147	1625140_at	2.063	7.291	7.1e-10	6e-09	6.6	8.66	NtR	CG6698	NtR
FBgn0033079	1627302_at	-0.957	9.322	7.1e-10	6e-09	9.6	8.64	Fmo-2	CG3174	Flavin-containing monooxygenase 2
NA	1624348_a_at	0.529	9.535	7.1e-10	6e-09	9.41	9.94	NA	NA	NA
FBgn0024732	1626405_at	-1.129	6.952	7.2e-10	6.1e-09	7.39	6.26	Drep-1	CG8357	DNA fragmentation factor-related protein 1
FBgn0034402	1632748_at	0.998	6.749	7.2e-10	6.1e-09	6.46	7.45	CG15084	CG15084	NA
FBgn0259740	1641408_at	1.1	10.415	7.2e-10	6.1e-09	10.06	11.16	CG42394	CG42394	NA
FBgn0032246	1624406_at	0.58	11.055	7.2e-10	6.1e-09	10.89	11.47	CG5168	CG5168	NA
NA	1622959_at	-2.146	7.071	7.2e-10	6.1e-09	7.8	5.66	NA	NA	NA
FBgn0032048	1630467_a_at	1.63	7.894	7.3e-10	6.2e-09	7.47	9.1	Dh31	CG13094	Diuretic hormone 31
FBgn0038549	1624963_at	-1.466	6.099	7.4e-10	6.2e-09	6.58	5.11	CG17802	CG17802	NA
FBgn0031061	1640794_at	0.612	7.713	7.5e-10	6.3e-09	7.54	8.15	CG14232	CG14232	NA
FBgn0027539	1623543_at	-0.75	8.749	7.6e-10	6.4e-09	8.95	8.2	CG5807	CG5807	NA
FBgn0039465	1625640_a_at	-0.816	9.183	7.6e-10	6.4e-09	9.56	8.74	Tsp97E	CG6323	Tetraspanin 97E
FBgn0034924	1624381_at	-1.645	5.234	7.7e-10	6.4e-09	5.78	4.14	CG17658	CG17658	NA
FBgn0086906	1628671_a_at	0.689	8.83	7.7e-10	6.5e-09	8.53	9.21	sls	CG1915	sallimus
FBgn0038966	1622896_at	-0.734	8.299	7.9e-10	6.6e-09	8.46	7.72	pinta	CG13848	prolonged depolarization afterpotential (PDA) is not apparent
FBgn0028687	1630925_at	0.597	11.642	8e-10	6.7e-09	11.5	12.09	Rpt1	CG1341	Rpt1
FBgn0004872	1641305_at	-1.959	7.22	8e-10	6.7e-09	7.89	5.93	piwi	CG6122	piwi
FBgn0004919	1627719_at	1.478	7.213	8e-10	6.7e-09	6.75	8.23	gol	CG2679	goliath
FBgn0051636	1630168_at	-1.207	7.498	8.2e-10	6.9e-09	7.78	6.58	CG31636	CG31636	NA
FBgn0053051	1640480_at	0.684	7.892	8.2e-10	6.9e-09	7.62	8.31	CG33051	CG33051	NA
FBgn0031777	1627459_at	0.717	7.237	8.2e-10	6.9e-09	6.97	7.69	CG9154	CG9154	NA
FBgn0037936	1622946_at	-2.016	9.922	8.3e-10	6.9e-09	10.62	8.61	CG6908	CG6908	NA
FBgn0015001	1632540_at	-1.591	10.04	8.3e-10	6.9e-09	10.5	8.91	iotaTry	CG7754	iotaTrypsin
FBgn0037205	1627806_at	-1.984	5.097	8.3e-10	6.9e-09	5.79	3.8	CG11133	CG11133	NA
FBgn0038251	1638651_a_at	-0.985	8.323	8.4e-10	7e-09	8.73	7.74	CG3508	CG3508	NA
FBgn0038237	1629322_at	-0.649	8.013	8.4e-10	7e-09	8.2	7.55	Pde6	CG8279	Phosphodiesterase 6
FBgn0003612	1627362_a_at	-1.563	6.891	8.4e-10	7e-09	7.55	5.98	Su(var)2-10	CG8068	Suppressor of variegation 2-10
FBgn0026403	1632082_at	1.119	6.53	8.4e-10	7e-09	5.98	7.1	Ndg	CG12908	Nidogen/entactin
FBgn0024179	1640409_at	-1.358	9.536	8.4e-10	7e-09	9.92	8.56	wit	CG10776	wishful thinking
FBgn0039430	1632675_s_at	-0.826	10.842	8.5e-10	7.1e-09	11.07	10.25	CG5455	CG5455	NA
FBgn0015075	1639264_at	0.704	7.923	8.5e-10	7.1e-09	7.68	8.38	Ddx1	CG9054	Dead-box-1
FBgn0035587	1627574_at	1.052	7.326	8.6e-10	7.1e-09	6.92	7.98	CG4623	CG4623	NA
FBgn0052115	1623963_at	1.978	8.556	8.7e-10	7.2e-09	8.01	9.99	CG32115	CG32115	NA
FBgn0031772	1635621_at	0.668	8.978	8.8e-10	7.2e-09	8.78	9.45	CG13994	CG13994	NA
FBgn0027094	1639644_at	0.679	9.064	8.8e-10	7.3e-09	8.83	9.51	Aats-ala	CG13391	Alanyl-tRNA synthetase
FBgn0024177	1631078_at	-4.393	8.001	8.8e-10	7.3e-09	9.49	5.1	zpg	CG10125	zero population growth
FBgn0027949	1631344_at	-2.05	8.204	8.8e-10	7.3e-09	8.97	6.93	msb1l	CG10364	msb1l
FBgn0037637	1624986_at	0.587	11.536	8.9e-10	7.3e-09	11.34	11.93	CG9836	CG9836	NA
FBgn0039043	1635175_at	0.507	8.136	8.9e-10	7.3e-09	7.95	8.46	CG17121	CG17121	NA
FBgn0014868	1625055_at	0.87	10.178	8.9e-10	7.3e-09	9.88	10.75	Ost48	CG9022	Oligosaccharyltransferase 48kD subunit
FBgn0024980	1638808_at	1.317	8.541	8.9e-10	7.3e-09	8.07	9.39	Syx4	CG2715	Syntaxin 4
FBgn0036921	1633804_at	0.72	12.468	8.9e-10	7.3e-09	12.26	12.98	RhoGDI	CG7823	RhoGDI
FBgn0033340	1627782_at	0.933	9.29	9e-10	7.3e-09	9.03	9.96	CG13751	CG13751	NA
FBgn0086367	1638505_at	-1.262	8.212	9e-10	7.4e-09	8.6	7.33	t	CG12120	tan
FBgn0035718	1625552_at	-1.447	9.408	9e-10	7.4e-09	10.01	8.57	CG14820	CG14820	NA
FBgn0036999	1637876_a_at	0.874	7.843	9e-10	7.4e-09	7.53	8.41	CG5976	CG5976	iso Glutaminyl cyclase
FBgn0040020	1624572_a_at	-0.999	9.445	9e-10	7.4e-09	9.86	8.86	MED21	CG17397	Mediator complex subunit 21
FBgn0051041	1624805_at	-4.488	8.875	9e-10	7.4e-09	10.6	6.11	CG31041	CG31041	NA
FBgn0030170	1631131_a_at	-1.649	5.693	9.1e-10	7.4e-09	6.26	4.61	CG2990	CG2990	NA
FBgn0053158	1624658_at	1.163	7.224	9.2e-10	7.5e-09	6.84	8.01	CG33158	CG33158	NA
FBgn0003053	1622949_at	0.954	10.365	9.2e-10	7.5e-09	10.09	11.05	peb	CG12212	pebbled
FBgn0023541	1627180_at	-2.716	8.2	9.2e-10	7.5e-09	8.95	6.24	Cyp4d14	CG3540	Cyp4d14
FBgn0004132	1623599_at	0.67	8.856	9.2e-10	7.5e-09	8.63	9.3	boca	CG30498	boca
FBgn0035228	1629433_at	-0.441	10.297	9.3e-10	7.5e-09	10.45	10.01	CG12091	CG12091	NA
FBgn0014861	1632669_at	-1.479	8.445	9.3e-10	7.6e-09	8.96	7.48	Mcm2	CG7538	Minichromosome maintenance 2
FBgn0040752	1625236_s_at	0.671	9.631	9.4e-10	7.6e-09	9.39	10.06	Prosap	CG30483	Prosap
FBgn0053555	1624207_at	0.734	7.498	9.4e-10	7.6e-09	7.3	8.03	btsz	CG33555	bitesize
FBgn0027558	1637584_at	2.073	9.478	9.4e-10	7.6e-09	8.99	11.06	pgant3	CG4445	polypeptide GalNAc transferase 3
FBgn0001112	1626984_at	1.736	5.9	9.5e-10	7.7e-09	5.45	7.18	Gld	CG1152	Glucose dehydrogenase
NA	1639335_at	1.256	8.162	9.7e-10	7.9e-09	7.75	9.01	NA	NA	NA
FBgn0032682	1636650_at	1.334	6.024	9.9e-10	8e-09	5.59	6.92	CG10176	CG10176	NA
FBgn0025595	1629609_at	-1.391	5.371	1e-09	8.2e-09	5.71	4.32	GRHR	CG11325	Gonadotropin-releasing hormone receptor
FBgn0037758	1632306_at	0.976	9.813	1e-09	8.1e-09	9.49	10.47	CG9467	CG9467	NA
FBgn0036321	1628823_at	-1.502	10.055	1e-09	8.1e-09	10.34	8.84	CG14120	CG14120	NA
FBgn0051199	1636567_at	1.413	8.087	1e-09	8.2e-09	7.6	9.01	CG31199	CG31199	NA
FBgn0039932	1634195_at	0.954	5.596	1e-09	8.3e-09	5.29	6.24	CG11093	CG11093	NA
FBgn0024958	1627562_at	0.716	7.964	1e-09	8.3e-09	7.74	8.45	Irp-1A	CG4900	Iron regulatory protein 1A
FBgn0011754	1632955_at	0.606	9.776	1.1e-09	8.7e-09	9.52	10.13	PhKgamma	CG1830	Phosphorylase kinase gamma
FBgn0032455	1625680_a_at	-0.736	9.683	1.1e-09	8.5e-09	9.81	9.07	CG5792	CG5792	NA
FBgn0038072	1627384_at	0.868	6.548	1.1e-09	8.6e-09	6.23	7.1	CG6225	CG6225	NA
FBgn0038827	1640096_at	-1.518	5.676	1.1e-09	8.6e-09	6.28	4.76	Fancd2	CG17269	Fancd2
FBgn0002543	1636905_at	1.187	8.409	1.1e-09	8.6e-09	7.94	9.13	lea	CG5481	leak
FBgn0022981	1627830_at	-3.825	7.7	1.1e-09	8.6e-09	9.06	5.23	rpk	CG1058	ripped pocket
FBgn0034299	1640118_at	-1.2	7.963	1.1e-09	8.6e-09	8.43	7.23	CG5757	CG5757	NA
FBgn0041180	1634552_at	1.234	10.792	1.1e-09	8.6e-09	10.43	11.66	TepIV	CG10363	Thiolester containing protein IV
FBgn0038951	1633650_at	0.626	7.246	1.1e-09	8.7e-09	7.01	7.63	CG5380	CG5380	NA
FBgn0033981	1624939_at	-1.641	10.033	1.1e-09	8.7e-09	10.53	8.89	Cyp6a21	CG10247	Cyp6a21
FBgn0085290	1633297_at	-1.348	6.272	1.1e-09	8.7e-09	6.86	5.51	CG34261	CG34261	NA
FBgn0015296	1623967_at	1.096	9.124	1.1e-09	8.8e-09	8.88	9.97	Shc	CG3715	SHC-adaptor protein
FBgn0034432	1623788_at	-0.721	12.205	1.1e-09	8.8e-09	12.44	11.72	CG7461	CG7461	NA
FBgn0261394	1634820_at	0.676	11.275	1.1e-09	8.9e-09	11.09	11.76	Pros29	CG9327	Proteasome 29kD subunit
FBgn0046302	1641038_at	0.617	13.09	1.1e-09	8.9e-09	12.87	13.48	CG10650	CG10650	NA
FBgn0039250	1641713_a_at	-1.026	6.092	1.1e-09	8.9e-09	6.45	5.42	CG11120	CG11120	NA
FBgn0036824	1632980_at	-0.76	10.854	1.1e-09	9e-09	11.09	10.33	CG3902	CG3902	NA
FBgn0250747	1635818_at	0.765	9.245	1.1e-09	8.7e-09	9.04	9.8	l(2)gd1	CG4713	NA
FBgn0039769	1629367_at	-2.706	8.601	1.1e-09	8.7e-09	9.36	6.65	CG15534	CG15534	NA
NA	1637875_a_at	0.719	8.215	1.1e-09	8.5e-09	7.8	8.52	NA	NA	NA
FBgn0040602	1629116_at	-4.581	8.192	1.2e-09	9.2e-09	9.77	5.18	CG14545	CG14545	NA
FBgn0016926	1633794_a_at	-0.691	11.151	1.2e-09	9.2e-09	11.37	10.68	Pino	CG4710	Pinocchio
FBgn0039637	1628536_s_at	1.098	10.156	1.2e-09	9.2e-09	9.7	10.8	CG11880	CG11880	NA
FBgn0085485	1627596_at	-0.973	7.548	1.2e-09	9.3e-09	7.62	6.65	CG34456	CG34456	NA
FBgn0010100	1634989_at	-0.721	11.897	1.2e-09	9.3e-09	12.12	11.4	Acon	CG9244	Aconitase
FBgn0011638	1631149_s_at	0.666	9.764	1.2e-09	9.4e-09	9.59	10.26	La	CG10922	La autoantigen-like
FBgn0034509	1634121_at	1.213	9.974	1.2e-09	9.4e-09	9.46	10.67	Obp57c	CG13421	Odorant-binding protein 57c
FBgn0038344	1641576_a_at	1.374	7.335	1.2e-09	9.4e-09	6.93	8.31	CG5205	CG5205	NA
FBgn0038326	1623335_a_at	-0.697	10.576	1.2e-09	9.4e-09	10.84	10.14	CG5044	CG5044	NA
FBgn0031662	1632503_at	0.549	9.069	1.2e-09	9.4e-09	8.94	9.49	CG3792	CG3792	NA
FBgn0003071	1634739_a_at	0.553	9.4	1.2e-09	9.5e-09	9.21	9.76	Pfk	CG4001	Phosphofructokinase
FBgn0039073	1626857_at	-1.552	7.319	1.2e-09	9.5e-09	7.83	6.28	CG4408	CG4408	NA
FBgn0031484	1625524_at	1.216	9.12	1.2e-09	9.6e-09	8.46	9.68	CG3165	CG3165	NA
FBgn0034938	1626729_at	0.617	8.188	1.2e-09	9.6e-09	7.94	8.56	CG3803	CG3803	NA
FBgn0040211	1633492_at	1.626	7.629	1.2e-09	9.6e-09	7.03	8.65	hgo	CG4779	homogentisate 1%2C2-dioxygenase
FBgn0026238	1641300_s_at	-1.009	10.837	1.2e-09	9.6e-09	11.22	10.21	gus	CG2944	gustavus
FBgn0031888	1630642_at	3.138	5.909	1.2e-09	9.6e-09	4.94	8.07	Pvf2	CG13780	PDGF- and VEGF-related factor 2
FBgn0038912	1625756_at	-0.557	8.242	1.2e-09	9.6e-09	8.38	7.82	CG6656	CG6656	NA
FBgn0034215	1634972_at	-0.76	10.393	1.2e-09	9.7e-09	10.62	9.86	CG4802	CG4802	NA
FBgn0033233	1635774_at	-1.013	7.566	1.2e-09	9.7e-09	8.01	7	Kdm4A	CG15835	Histone demethylase 4A
NA	1635886_s_at	1.218	9.897	1.2e-09	9.4e-09	9.58	10.8	NA	NA	NA
NA	1634786_at	1.729	8.185	1.2e-09	9.6e-09	7.23	8.95	NA	NA	NA
FBgn0036930	1627761_at	1.052	8.817	1.2e-09	9.3e-09	8.56	9.61	fat2	CG7749	NA
NA	1623569_at	1.685	8.895	1.2e-09	9.6e-09	8.45	10.13	NA	NA	NA
FBgn0030551	1623347_at	-3.915	7.919	1.3e-09	9.9e-09	9.26	5.35	CG11674	CG11674	NA
FBgn0020633	1631517_at	-1.268	8.773	1.3e-09	1e-08	9.31	8.05	Mcm7	CG4978	Minichromosome maintenance 7
FBgn0030507	1632747_at	-1.53	7.1	1.3e-09	1e-08	7.69	6.16	CG11164	CG11164	NA
FBgn0010548	1627861_s_at	-0.8	10.278	1.3e-09	1e-08	10.5	9.7	Aldh-III	CG11140	Aldehyde dehydrogenase type III
FBgn0036571	1639938_at	0.91	8.037	1.3e-09	1e-08	7.76	8.67	CG12272	CG12272	NA
FBgn0038460	1636775_at	0.914	8.336	1.3e-09	1e-08	7.96	8.87	CG18622	CG18622	NA
FBgn0000318	1623936_at	0.649	11.728	1.3e-09	1e-08	11.5	12.14	cl	CG11024	clot
FBgn0003134	1625806_at	-0.932	9.908	1.3e-09	1e-08	10.18	9.25	Pp1alpha-96A	CG6593	Protein phosphatase 1alpha at 96A
FBgn0003429	1637301_a_at	-1.188	6.235	1.3e-09	1e-08	6.55	5.36	slo	CG10693	slowpoke
FBgn0030448	1634178_at	-0.76	8.776	1.3e-09	1e-08	9.03	8.27	CG4351	CG4351	NA
FBgn0030073	1622908_a_at	1.375	8.439	1.4e-09	1.1e-08	7.97	9.34	CG10962	CG10962	NA
FBgn0017572	1628281_at	0.593	9.489	1.4e-09	1e-08	9.33	9.92	Mo25	CG4083	Mo25
FBgn0085256	1634525_at	1.91	9.771	1.4e-09	1.1e-08	9.09	11	CG34227	CG34227	NA
FBgn0037606	1631092_at	-0.564	8.08	1.4e-09	1.1e-08	8.26	7.69	CG8032	CG8032	NA
FBgn0032935	1628475_at	1.104	8.778	1.4e-09	1.1e-08	8.53	9.63	CG8678	CG8678	NA
FBgn0015040	1641428_at	0.639	9.301	1.4e-09	1.1e-08	9	9.64	Cyp9c1	CG3616	Cytochrome P450-9c1
FBgn0034158	1632545_s_at	-0.491	8.575	1.4e-09	1.1e-08	8.71	8.22	CG5522	CG5522	NA
FBgn0015622	1627261_s_at	0.705	10.749	1.4e-09	1.1e-08	10.43	11.14	Cnx99A	CG11958	Calnexin 99A
FBgn0038020	1636174_at	2.411	9.758	1.4e-09	1.1e-08	8.99	11.4	GstD9	CG10091	Glutathione S transferase D9
FBgn0033093	1625434_at	-1.087	9.323	1.4e-09	1.1e-08	9.69	8.6	CG3270	CG3270	NA
FBgn0019830	1628991_at	-1.353	11.082	1.4e-09	1.1e-08	11.47	10.11	colt	CG3057	congested-like trachea
FBgn0033663	1631379_a_at	0.854	11.988	1.4e-09	1.1e-08	11.77	12.62	ERp60	CG8983	ERp60
FBgn0052662	1639826_at	1.214	9.025	1.4e-09	1.1e-08	8.69	9.91	CG32662	CG32662	NA
FBgn0050377	1625421_at	-2.353	6.925	1.5e-09	1.1e-08	7.72	5.36	CG30377	CG30377	NA
FBgn0039030	1633308_at	-0.915	9.857	1.5e-09	1.1e-08	10.16	9.24	CG6660	CG6660	NA
FBgn0039003	1626657_a_at	1.491	7.368	1.5e-09	1.1e-08	6.91	8.4	wfs1	CG4917	wolfram syndrome 1
FBgn0038700	1639762_at	-0.832	10.863	1.5e-09	1.1e-08	11.02	10.19	CG3734	CG3734	NA
FBgn0015268	1626785_at	-0.766	11.874	1.5e-09	1.1e-08	12.11	11.35	Nap1	CG5330	Nucleosome assembly protein 1
FBgn0035590	1636694_at	0.489	7.83	1.5e-09	1.1e-08	7.68	8.17	CG10673	CG10673	NA
FBgn0046776	1630660_at	-1.084	7.981	1.5e-09	1.1e-08	8.25	7.17	CG14033	CG14033	NA
FBgn0038369	1638092_a_at	0.63	9.581	1.5e-09	1.1e-08	9.4	10.03	Arpc3A	CG4560	Arpc3A
FBgn0015582	1636137_at	0.613	7.752	1.5e-09	1.1e-08	7.56	8.17	dare	CG12390	defective in the avoidance of repellents
FBgn0034894	1640962_s_at	0.983	10.334	1.5e-09	1.1e-08	10.1	11.08	CG4091	CG4091	NA
FBgn0039529	1638193_at	1.091	6.774	1.5e-09	1.1e-08	6.43	7.52	CG5612	CG5612	NA
FBgn0002924	1637264_at	-1.316	7.547	1.5e-09	1.1e-08	8.07	6.76	ncd	CG7831	non-claret disjunctional
FBgn0052649	1637405_at	0.68	8.158	1.5e-09	1.1e-08	7.93	8.61	CG32649	CG32649	NA
FBgn0030234	1630964_at	1	11.018	1.5e-09	1.1e-08	10.59	11.59	CG15211	CG15211	NA
FBgn0030607	1631173_at	-1.665	8.475	1.5e-09	1.2e-08	8.87	7.21	dob	CG5560	doppelganger von brummer
FBgn0002985	1625850_at	-1.506	8.253	1.5e-09	1.2e-08	8.72	7.22	odd	CG3851	odd skipped
FBgn0026666	1640339_at	0.718	8.614	1.5e-09	1.2e-08	8.37	9.09	l(1)G0136	CG8198	lethal (1) G0136
FBgn0016697	1641432_a_at	0.532	11.71	1.5e-09	1.2e-08	11.59	12.12	Prosalpha5	CG10938	Proteasome alpha5 subunit
FBgn0033204	1630212_at	2.472	8.89	1.5e-09	1.2e-08	8.11	10.58	CG2065	CG2065	NA
FBgn0002968	1636146_at	1.054	8.915	1.6e-09	1.2e-08	8.65	9.7	Nrg	CG1634	Neuroglian
FBgn0039349	1635280_at	0.917	9.519	1.6e-09	1.2e-08	9.25	10.16	Ssadh	CG4685	Succinic semialdehyde dehydrogenase
FBgn0030668	1625297_at	-0.821	10.427	1.6e-09	1.2e-08	10.64	9.82	CG8128	CG8128	NA
FBgn0021764	1628319_s_at	-0.792	7.103	1.6e-09	1.2e-08	7.41	6.62	sdk	CG5227	sidekick
FBgn0052554	1628802_at	0.895	6.192	1.6e-09	1.2e-08	5.9	6.79	CG32554	CG32554	NA
FBgn0029969	1638717_at	-0.563	9.858	1.6e-09	1.2e-08	10	9.44	CG10932	CG10932	NA
FBgn0040334	1628184_at	0.749	6.835	1.6e-09	1.2e-08	6.58	7.33	Tsp3A	CG10742	Tetraspanin 3A
FBgn0004644	1626527_at	1.656	6.15	1.6e-09	1.2e-08	5.63	7.29	hh	CG4637	hedgehog
FBgn0029134	1636559_s_at	0.523	12.021	1.6e-09	1.2e-08	11.89	12.42	Prosbeta5	CG12323	Proteasome beta5 subunit
FBgn0001332	1637785_at	-0.817	10.331	1.6e-09	1.2e-08	10.53	9.71	L	CG10109	Lobe
FBgn0026263	1639746_at	-0.899	8.144	1.6e-09	1.2e-08	8.5	7.6	bip1	CG7574	bip1
NA	1625698_at	5.108	5.802	1.6e-09	1.2e-08	4.34	9.45	NA	NA	NA
NA	1624517_at	1.557	5.899	1.6e-09	1.2e-08	5.45	7.01	NA	NA	NA
FBgn0002868	1632873_at	-0.476	14.248	1.7e-09	1.2e-08	14.37	13.89	MtnA	CG9470	Metallothionein A
FBgn0013749	1624693_at	0.633	11.912	1.7e-09	1.2e-08	11.73	12.36	Arf102F	CG11027	ADP ribosylation factor 102F
FBgn0030246	1634316_at	0.612	8.877	1.7e-09	1.2e-08	8.66	9.27	CG1582	CG1582	NA
FBgn0010590	1641616_at	0.447	11.348	1.7e-09	1.2e-08	11.23	11.67	Prosbeta1	CG8392	Proteasome beta1 subunit
FBgn0025742	1639757_at	0.731	8.625	1.7e-09	1.2e-08	8.4	9.13	mtm	CG9115	myotubularin
FBgn0033225	1635079_at	0.556	8.374	1.7e-09	1.3e-08	8.13	8.69	CG1550	CG1550	NA
FBgn0039807	1634877_at	0.976	5.873	1.7e-09	1.3e-08	5.56	6.54	CG15546	CG15546	NA
FBgn0035665	1626093_at	-0.49	14.195	1.7e-09	1.3e-08	14.36	13.88	Jon65Aiii	CG6483	Jonah 65Aiii
FBgn0002638	1630166_s_at	-1.061	9.652	1.7e-09	1.3e-08	10.07	9.01	Bj1	CG10480	Bj1 protein
FBgn0028675	1632337_at	1.126	5.715	1.7e-09	1.3e-08	5.27	6.39	Sur	CG5772	Sulfonylurea receptor
NA	1637928_at	-1.262	8.551	1.7e-09	1.2e-08	8.83	7.57	NA	NA	NA
FBgn0013726	1627280_s_at	1.092	10.366	1.8e-09	1.3e-08	10.16	11.25	pnut	CG8705	peanut
FBgn0039385	1628424_at	0.585	8.642	1.8e-09	1.3e-08	8.45	9.03	CG5913	CG5913	NA
FBgn0014033	1631821_at	2.082	6.539	1.8e-09	1.3e-08	5.79	7.87	Sr-CI	CG4099	Scavenger receptor class C%2C type I
FBgn0033235	1628751_at	0.736	9.12	1.8e-09	1.3e-08	8.87	9.61	CG8728	CG8728	NA
FBgn0038815	1633986_at	-1.294	5.387	1.8e-09	1.3e-08	5.91	4.61	CG5466	CG5466	NA
FBgn0033376	1627680_at	0.696	7.645	1.8e-09	1.4e-08	7.39	8.08	CG8777	CG8777	NA
FBgn0035627	1640859_at	-1.912	6.354	1.8e-09	1.4e-08	7.04	5.13	Sse	CG10583	Separase
FBgn0038861	1624669_at	0.733	8.128	1.8e-09	1.4e-08	7.89	8.62	CG7009	CG7009	NA
FBgn0032135	1628402_a_at	0.759	8.17	1.9e-09	1.4e-08	7.9	8.66	GlcAT-S	CG3881	GlcAT-S
FBgn0035294	1641198_at	0.671	7.297	1.9e-09	1.4e-08	7.11	7.78	Mfap1	CG1017	Microfibril-associated protein 1
FBgn0000152	1640260_at	0.848	6.348	1.9e-09	1.4e-08	6.07	6.91	Axs	CG9703	Abnormal X segregation
FBgn0037838	1636309_at	-0.882	6.45	1.9e-09	1.4e-08	6.78	5.9	CG4089	CG4089	NA
FBgn0032230	1634213_at	0.665	7.655	1.9e-09	1.4e-08	7.45	8.12	CG13139	CG13139	lowfat
FBgn0030503	1634925_at	-0.685	8.914	1.9e-09	1.4e-08	9.02	8.33	Tango2	CG11176	Transport and Golgi organization 2
FBgn0036318	1635218_at	0.812	11.159	1.9e-09	1.4e-08	10.89	11.7	CG11009	CG11009	NA
FBgn0003044	1623525_at	-0.948	7.959	1.9e-09	1.4e-08	8.3	7.35	Pcl	CG5109	Polycomblike
FBgn0051373	1638417_at	-0.76	10.316	1.9e-09	1.4e-08	10.52	9.75	CG31373	CG31373	NA
FBgn0034744	1635121_a_at	0.636	9.68	1.9e-09	1.4e-08	9.5	10.13	Vps20	CG4071	Vacuolar protein sorting 20
FBgn0053468	1635486_at	2.407	7.764	1.9e-09	1.4e-08	7.38	9.78	CG33468	CG33468	NA
FBgn0015816	1636044_at	0.946	8.789	1.9e-09	1.4e-08	8.45	9.4	Slh	CG3539	SLY-1 homologous
FBgn0037778	1636340_at	0.503	7.239	1.9e-09	1.4e-08	7.08	7.58	mtTFB2	CG3910	mitochondrial transcription factor B2
FBgn0010516	1632532_s_at	-0.498	11.752	1.9e-09	1.4e-08	11.9	11.4	wal	CG8996	walrus
FBgn0036688	1629441_at	-1.236	6.596	1.9e-09	1.4e-08	7.04	5.8	Fit2	CG7729	Fermitin 2
FBgn0243512	1631765_at	0.829	10.587	1.9e-09	1.4e-08	10.29	11.12	puc	CG7850	puckered
FBgn0031599	1628599_at	-0.652	9.053	1.9e-09	1.4e-08	9.2	8.55	Psf2	CG18013	NA
FBgn0052352	1623199_a_at	-1.135	9.576	1.9e-09	1.4e-08	9.89	8.76	CG32352	CG32352	NA
FBgn0028952	1633843_at	-1.539	5.522	2e-09	1.4e-08	6.06	4.52	CG31672	CG31672	NA
FBgn0038658	1635724_at	0.706	13.243	2e-09	1.4e-08	12.99	13.69	CG14292	CG14292	NA
FBgn0034883	1629642_a_at	-1.28	9.864	2e-09	1.4e-08	10.18	8.9	CG17664	CG17664	NA
FBgn0038638	1627420_s_at	1.002	10.668	2e-09	1.4e-08	10.47	11.48	CG7702	CG7702	NA
FBgn0033884	1635377_at	-1.127	6.553	2e-09	1.4e-08	6.98	5.85	CG13344	CG13344	NA
FBgn0011802	1629281_at	-1.13	7.132	2e-09	1.5e-08	7.63	6.5	Gem3	CG6539	Gemin3
FBgn0039656	1639907_at	2.006	5.622	2e-09	1.5e-08	4.91	6.91	CG11951	CG11951	NA
FBgn0037378	1638342_at	0.471	10.194	2e-09	1.5e-08	10.04	10.51	CG2046	CG2046	NA
FBgn0031973	1636145_at	1.617	7.368	2.1e-09	1.5e-08	6.68	8.3	Spn28D	CG7219	Serpin 28D
FBgn0034693	1623429_at	1.039	7.405	2.1e-09	1.5e-08	7.01	8.05	CG11073	CG11073	NA
FBgn0039128	1634621_at	-1.514	5.704	2.1e-09	1.5e-08	6.33	4.81	CG13599	CG13599	NA
FBgn0032215	1625571_at	0.569	9.184	2.1e-09	1.5e-08	9.01	9.58	CG5385	CG5385	NA
FBgn0027836	1640341_s_at	1.493	9.7	2.1e-09	1.5e-08	9.3	10.79	Dgp-1	CG5729	Dgp-1
FBgn0025865	1640871_at	0.99	9.609	2.1e-09	1.5e-08	9.35	10.34	Cortactin	CG3637	Cortactin
FBgn0037974	1639971_at	1.496	5.059	2.1e-09	1.5e-08	4.25	5.75	CG12224	CG12224	NA
FBgn0030411	1640452_at	0.735	8.689	2.1e-09	1.5e-08	8.48	9.21	CG2540	CG2540	NA
FBgn0039065	1623040_at	-1.217	7.922	2.1e-09	1.5e-08	8.33	7.12	CG4449	CG4449	NA
FBgn0051063	1637733_at	0.556	10.259	2.1e-09	1.5e-08	10.06	10.61	CG31063	CG31063	NA
FBgn0010038	1630258_at	2.876	8.982	2.2e-09	1.6e-08	8.29	11.17	GstD2	CG4181	Glutathione S transferase D2
FBgn0027579	1632146_a_at	-0.873	10.474	2.2e-09	1.6e-08	10.75	9.87	CG5508	CG5508	NA
FBgn0037705	1633534_s_at	0.644	9.673	2.2e-09	1.6e-08	9.41	10.05	mura	CG9381	murashka
FBgn0037517	1636398_at	1.18	10.197	2.2e-09	1.6e-08	9.83	11.01	CG10086	CG10086	NA
FBgn0033458	1639575_at	-1.974	7.657	2.2e-09	1.6e-08	8.28	6.31	CG18446	CG18446	NA
FBgn0050424	1628503_at	0.979	8.928	2.2e-09	1.6e-08	8.63	9.6	CG30424	CG30424	NA
FBgn0032748	1628001_at	-0.917	9.127	2.2e-09	1.6e-08	9.45	8.54	CG10492	CG10492	NA
FBgn0030309	1637430_s_at	0.93	10.776	2.2e-09	1.6e-08	10.56	11.49	CG1572	CG1572	NA
FBgn0038106	1630932_at	0.47	8.416	2.2e-09	1.6e-08	8.24	8.71	CG7488	CG7488	NA
FBgn0038344	1628807_at	1.124	9.061	2.3e-09	1.6e-08	8.72	9.85	CG5205	CG5205	NA
FBgn0037293	1638354_at	0.929	10.015	2.3e-09	1.6e-08	9.74	10.67	CG12007	CG12007	NA
FBgn0051216	1640214_at	1.991	7.185	2.3e-09	1.6e-08	6.72	8.71	CG31216	CG31216	Nicotinamide amidase
FBgn0037602	1624984_at	0.734	8.129	2.3e-09	1.6e-08	7.83	8.56	CG8021	CG8021	NA
FBgn0038590	1639409_at	0.723	6.514	2.3e-09	1.6e-08	6.28	7	CG12320	CG12320	NA
FBgn0029155	1641118_at	0.735	9.389	2.3e-09	1.6e-08	9.21	9.95	Mdh	CG5889	Malic enzyme b
FBgn0023527	1637494_at	-0.638	8.223	2.3e-09	1.6e-08	8.45	7.81	CG3071	CG3071	NA
FBgn0034063	1637774_s_at	-0.678	8.115	2.3e-09	1.7e-08	8.23	7.55	CG8389	CG8389	NA
FBgn0033104	1638030_at	0.688	7.308	2.4e-09	1.7e-08	7.12	7.81	CG15237	CG15237	NA
FBgn0026721	1629572_a_at	-0.928	9.58	2.4e-09	1.7e-08	9.79	8.86	fat-spondin	CG6953	fat-spondin
FBgn0032783	1627106_a_at	-0.878	10.667	2.4e-09	1.7e-08	11	10.13	CG10237	CG10237	NA
FBgn0030026	1627015_at	0.7	9.415	2.4e-09	1.7e-08	9.19	9.9	sni	CG10964	sniffer
FBgn0036487	1633113_at	0.955	8.249	2.4e-09	1.7e-08	7.99	8.95	CG6876	CG6876	NA
FBgn0034915	1633284_at	0.78	9.156	2.4e-09	1.7e-08	8.92	9.7	eIF6	CG17611	eIF6
FBgn0033683	1627460_at	0.796	10.314	2.4e-09	1.7e-08	9.98	10.77	CG18343	CG18343	NA
FBgn0039450	1638670_a_at	0.666	9.443	2.4e-09	1.7e-08	9.18	9.85	CG5484	CG5484	NA
FBgn0031322	1623996_at	0.605	8.604	2.4e-09	1.7e-08	8.4	9	CG5001	CG5001	NA
FBgn0058160	1636647_s_at	0.59	10.375	2.4e-09	1.7e-08	10.09	10.68	CG40160	CG40160	NA
NA	1639571_s_at	2.664	7.064	2.4e-09	1.7e-08	6.49	9.16	NA	NA	NA
FBgn0038662	1633597_at	-0.883	10.706	2.5e-09	1.7e-08	10.93	10.05	CG14290	CG14290	NA
FBgn0036876	1636526_at	-1.591	9.15	2.5e-09	1.7e-08	9.78	8.19	CG9451	CG9451	NA
FBgn0039557	1625720_at	0.663	7.38	2.5e-09	1.7e-08	7.19	7.85	CG12259	CG12259	NA
FBgn0023535	1637548_at	-1.287	8.898	2.5e-09	1.7e-08	9.21	7.93	arg	CG18104	arginase
FBgn0053108	1631039_at	0.743	6.794	2.5e-09	1.7e-08	6.62	7.36	CG33108	CG33108	NA
FBgn0015270	1635760_at	-1.502	6.23	2.5e-09	1.8e-08	6.77	5.27	Orc2	CG3041	Origin recognition complex subunit 2
NA	1638015_at	0.983	5.011	2.5e-09	1.7e-08	4.69	5.68	NA	NA	NA
FBgn0033377	1626864_at	0.947	9.224	2.6e-09	1.8e-08	9	9.94	Pmm45A	CG8073	Phosphomannomutase 45A
FBgn0039856	1628758_at	-1.952	8.463	2.6e-09	1.8e-08	9.07	7.12	CG1774	CG1774	NA
FBgn0038498	1636035_at	1.364	4.202	2.6e-09	1.8e-08	3.67	5.03	beat-IIa	CG14334	beaten path IIa
FBgn0039260	1632464_at	0.508	9.499	2.6e-09	1.8e-08	9.33	9.83	Smg6	CG6369	Smg6
FBgn0013984	1629141_at	1.336	9.737	2.6e-09	1.8e-08	9.38	10.71	InR	CG18402	Insulin-like receptor
FBgn0031376	1624372_at	0.688	10.592	2.6e-09	1.8e-08	10.32	11.01	CG10908	CG10908	Derlin-1
NA	1641693_s_at	-0.983	8.737	2.6e-09	1.8e-08	9.02	8.04	NA	NA	NA
FBgn0003612	1632783_a_at	-1.538	7.685	2.7e-09	1.9e-08	8.26	6.72	Su(var)2-10	CG8068	Suppressor of variegation 2-10
FBgn0030615	1636688_at	1.609	6.978	2.7e-09	1.8e-08	6.36	7.96	Cyp4s3	CG9081	Cyp4s3
FBgn0024509	1637124_at	0.614	10.113	2.7e-09	1.8e-08	9.9	10.51	sec13	CG6773	sec13
FBgn0037554	1636289_s_at	1.033	6.551	2.7e-09	1.9e-08	6.24	7.27	DNApol-iota	CG7602	DNApol-iota
FBgn0031022	1630301_at	0.565	7.229	2.7e-09	1.9e-08	6.95	7.52	CG12204	CG12204	NA
FBgn0037141	1626494_at	-1.382	7.609	2.7e-09	1.9e-08	8.14	6.75	DNApol-eta	CG7143	DNApol-eta
FBgn0085227	1625557_at	1.527	9.146	2.7e-09	1.9e-08	8.82	10.34	CG34198	CG34198	NA
NA	1638763_at	-0.774	8.31	2.7e-09	1.9e-08	8.75	7.98	NA	NA	NA
FBgn0030479	1626413_at	0.653	6.338	2.8e-09	1.9e-08	6.11	6.76	Rbp1-like	CG1987	Rbp1-like
FBgn0030230	1639837_at	1.733	4.297	2.8e-09	1.9e-08	3.78	5.52	Rph	CG11556	Rabphilin
FBgn0036627	1639276_at	1.672	8.031	2.8e-09	1.9e-08	7.57	9.25	CG4680	CG4680	NA
FBgn0033130	1623094_at	1.218	8.54	2.8e-09	1.9e-08	8.28	9.5	Tsp42Ei	CG12843	Tetraspanin 42Ei
FBgn0039050	1628839_at	-1.131	6.317	2.8e-09	1.9e-08	6.7	5.57	CG17110	CG17110	NA
NA	1632834_a_at	0.552	10.036	2.8e-09	1.9e-08	9.86	10.41	NA	NA	NA
FBgn0038083	1638182_at	1.687	7.276	2.9e-09	2e-08	6.53	8.22	CG5999	CG5999	NA
FBgn0033113	1634958_at	1.093	7.476	2.9e-09	2e-08	7.16	8.26	CG9455	CG9455	Serpin 42Dc
FBgn0043362	1632057_at	1.121	7.343	2.9e-09	2e-08	7.04	8.17	bchs	CG14001	blue cheese
FBgn0010441	1638252_at	0.8	8.076	2.9e-09	2e-08	7.83	8.63	pll	CG5974	pelle
FBgn0045761	1624272_at	1.249	9.249	2.9e-09	2e-08	8.86	10.11	CHKov1	CG10618	CHKov1
FBgn0024285	1628382_at	0.792	9.657	2.9e-09	2e-08	9.44	10.23	Srp54	CG4602	Srp54
FBgn0028926	1632384_at	0.652	7.339	2.9e-09	2e-08	7.14	7.79	NC2beta	CG4185	NC2beta
FBgn0085215	1641123_at	0.531	9.996	2.9e-09	2e-08	9.83	10.37	CG34186	CG34186	NA
FBgn0050440	1634125_at	-1.324	7.074	3e-09	2e-08	7.51	6.18	CG30440	CG30440	NA
FBgn0037882	1625165_at	0.681	7.332	3e-09	2e-08	7.11	7.79	CG17187	CG17187	NA
FBgn0033918	1638456_at	0.503	9.468	3e-09	2e-08	9.3	9.81	CG8531	CG8531	NA
FBgn0038291	1638733_at	-2.293	7.49	3e-09	2e-08	8.33	6.04	CG3984	CG3984	NA
FBgn0243514	1627746_at	1.38	5.24	3e-09	2e-08	4.84	6.22	eater	CG6124	eater
FBgn0053116	1640146_at	0.897	9.985	3e-09	2e-08	9.83	10.73	CG33116	CG33116	NA
FBgn0031985	1630764_at	0.806	9.572	3e-09	2.1e-08	9.36	10.17	CG8683	CG8683	NA
FBgn0040600	1639443_at	0.714	10.367	3e-09	2.1e-08	10.19	10.91	CG13631	CG13631	NA
FBgn0039207	1632273_at	-0.73	8.37	3.1e-09	2.1e-08	8.6	7.87	CG5789	CG5789	NA
FBgn0029157	1637629_a_at	-0.917	7.894	3.1e-09	2.1e-08	8.25	7.34	ssh	CG6238	slingshot
FBgn0029838	1635086_at	-0.606	10.938	3.1e-09	2.1e-08	11.17	10.57	CG4666	CG4666	NA
FBgn0033038	1632180_at	0.794	8.678	3.1e-09	2.1e-08	8.37	9.17	CG7791	CG7791	NA
FBgn0041775	1625080_at	-1.157	10.608	3.1e-09	2.1e-08	11.05	9.9	tral	CG10686	trailer hitch
FBgn0026380	1623021_at	0.479	11.821	3.1e-09	2.1e-08	11.73	12.21	Prosbeta3	CG11981	Proteasome beta3 subunit
FBgn0035890	1632912_s_at	0.699	7.222	3.1e-09	2.1e-08	6.98	7.68	CG13667	CG13667	NA
FBgn0000473	1626401_at	-1.738	10.438	3.1e-09	2.1e-08	11.05	9.31	Cyp6a2	CG9438	Cytochrome P450-6a2
FBgn0032242	1633718_at	0.662	9.754	3.2e-09	2.1e-08	9.48	10.14	CG5355	CG5355	NA
FBgn0040959	1636622_at	-1.207	12.209	3.2e-09	2.1e-08	12.69	11.48	Peritrophin-15a	CG17814	Peritrophin-15a
FBgn0037643	1630433_at	-0.911	11.167	3.2e-09	2.2e-08	11.44	10.53	skap	CG11963	skpA associated protein
FBgn0052109	1637402_at	0.607	7.971	3.2e-09	2.2e-08	7.82	8.43	CG32109	CG32109	NA
FBgn0010431	1629445_at	-5.18	8.556	3.3e-09	2.2e-08	10.34	5.16	mtrm	CG18543	matrimony
FBgn0028525	1624856_at	-2.765	5.684	3.3e-09	2.2e-08	6.65	3.88	c(2)M	CG4249	crossover suppressor on 2 of Manheim
FBgn0027496	1633785_at	0.665	10.503	3.3e-09	2.2e-08	10.28	10.95	epsilonCOP	CG9543	epsilonCOP
FBgn0250835	1635945_at	1.181	7.141	3.3e-09	2.2e-08	6.89	8.07	CG15394	CG15394	NA
FBgn0001225	1635044_at	-1.566	10.672	3.3e-09	2.2e-08	11.25	9.68	Hsp26	CG4183	Heat shock protein 26
FBgn0053181	1634670_at	-0.681	11.211	3.4e-09	2.3e-08	11.42	10.74	CG33181	CG33181	NA
FBgn0010397	1629981_at	0.908	9.746	3.4e-09	2.3e-08	9.51	10.42	LamC	CG10119	Lamin C
FBgn0004888	1638529_at	-0.518	11.915	3.4e-09	2.3e-08	12.09	11.57	Scsalpha	CG1065	Succinyl coenzyme A synthetase alpha subunit
FBgn0061476	1625024_at	-1.686	7.393	3.4e-09	2.3e-08	8.02	6.34	zwilch	CG18729	zwilch
FBgn0035558	1632063_s_at	-0.733	8.384	3.4e-09	2.3e-08	8.67	7.94	CG11357	CG11357	NA
FBgn0045866	1631909_at	0.477	11.656	3.4e-09	2.3e-08	11.51	11.99	bai	CG11785	baiser
FBgn0034553	1622901_at	-0.953	8.138	3.4e-09	2.3e-08	8.39	7.44	CG9993	CG9993	NA
FBgn0030148	1624662_at	-2.747	7.903	3.4e-09	2.3e-08	9.04	6.29	CG3106	CG3106	NA
NA	1634865_at	1.376	5.467	3.4e-09	2.3e-08	5.03	6.41	NA	NA	NA
FBgn0003138	1638438_a_at	-0.68	9.618	3.5e-09	2.3e-08	9.94	9.26	Ptp61F	CG9181	Protein tyrosine phosphatase 61F
FBgn0030270	1623687_at	-3.476	9.017	3.5e-09	2.3e-08	10.31	6.83	CG15199	CG15199	NA
FBgn0020496	1623106_s_at	0.556	9.672	3.5e-09	2.3e-08	9.54	10.1	CtBP	CG7583	C-terminal Binding Protein
FBgn0000588	1623519_at	-1.376	7.372	3.5e-09	2.3e-08	7.84	6.46	esc	CG14941	extra sexcombs
FBgn0013765	1635619_a_at	0.748	8.147	3.5e-09	2.3e-08	8.08	8.82	cnn	CG4832	centrosomin
FBgn0032451	1627925_at	0.653	10.017	3.5e-09	2.4e-08	9.86	10.51	spict	CG12292	spichthyin
NA	1638635_at	0.624	8.179	3.5e-09	2.3e-08	7.97	8.6	NA	NA	NA
FBgn0004399	1639136_s_at	-1.054	8.115	3.5e-09	2.3e-08	8.5	7.44	psq	CG2368	NA
FBgn0037656	1638463_at	0.529	6.655	3.6e-09	2.4e-08	6.52	7.05	CG11986	CG11986	NA
FBgn0033786	1638816_at	1.034	9.864	3.6e-09	2.4e-08	9.66	10.7	CG3884	CG3884	NA
FBgn0032382	1623900_a_at	-1.08	9.198	3.6e-09	2.4e-08	9.49	8.41	CG14935	CG14935	Maltase B2
FBgn0053635	1627824_at	0.758	7.833	3.6e-09	2.4e-08	7.59	8.35	CG33635	CG33635	NA
FBgn0010342	1629576_at	-1.165	8.345	3.6e-09	2.4e-08	8.81	7.65	Map60	CG1825	Microtubule-associated protein 60
FBgn0030466	1639266_at	-0.732	6.934	3.7e-09	2.4e-08	7.22	6.49	CG15744	CG15744	NA
FBgn0028325	1635253_a_at	-0.38	11.307	3.7e-09	2.4e-08	11.42	11.04	l(1)G0334	CG7010	lethal (1) G0334
FBgn0034897	1635678_at	-0.7	10.161	3.7e-09	2.4e-08	10.34	9.64	CG11299	CG11299	Sestrin
FBgn0028527	1638724_at	0.589	8.976	3.8e-09	2.5e-08	8.81	9.4	CG18507	CG18507	NA
FBgn0024361	1626767_at	1.23	11.818	3.8e-09	2.5e-08	11.56	12.79	Tsp2A	CG11415	Tetraspanin 2A
FBgn0003447	1622932_s_at	-1.103	7.715	3.8e-09	2.5e-08	8.14	7.04	sn	CG32858	singed
FBgn0250816	1640830_at	-3.254	7.638	3.8e-09	2.5e-08	8.78	5.53	AGO3	CG40300	Argonaute 3
NA	1630120_s_at	0.985	3.707	3.8e-09	2.5e-08	3.32	4.31	NA	NA	NA
FBgn0025686	1623953_at	2.905	6.883	3.8e-09	2.5e-08	5.87	8.77	CG11592	CG11592	NA
FBgn0031450	1630393_a_at	0.851	9.132	3.9e-09	2.5e-08	8.9	9.75	Hrs	CG2903	Hepatocyte growth factor regulated tyrosine kinase substrate
FBgn0027552	1640451_at	-0.78	11.822	3.9e-09	2.6e-08	12.05	11.27	CG10863	CG10863	NA
FBgn0030530	1625797_at	1.067	7.96	3.9e-09	2.6e-08	7.65	8.72	CG11063	CG11063	Ajuba LIM protein
FBgn0038135	1635769_at	-1.268	10.733	3.9e-09	2.6e-08	10.61	9.34	CG8773	CG8773	NA
FBgn0004924	1634104_a_at	-1.089	8.104	3.9e-09	2.6e-08	8.52	7.43	Top1	CG6146	Topoisomerase 1
FBgn0033428	1627448_at	0.658	10.197	3.9e-09	2.6e-08	9.99	10.64	Updo	CG1818	Updo
FBgn0037913	1627014_a_at	-0.41	13.67	3.9e-09	2.6e-08	13.81	13.4	CG6783	CG6783	fatty acid bindin protein
FBgn0037847	1635788_a_at	-0.471	10.699	3.9e-09	2.6e-08	10.88	10.4	SelR	CG6584	SelR
FBgn0026876	1626359_at	-1.308	7.046	3.9e-09	2.6e-08	7.53	6.22	CG11403	CG11403	NA
FBgn0015010	1625266_at	1.125	12.313	3.9e-09	2.6e-08	11.98	13.1	Ag5r	CG9538	Antigen 5-related
FBgn0000659	1630305_at	0.959	8.248	3.9e-09	2.6e-08	8.03	8.99	fkh	CG10002	fork head
NA	1636539_at	0.454	11.294	3.9e-09	2.6e-08	11.2	11.65	NA	NA	NA
FBgn0046876	1623289_at	-1.566	6.125	4e-09	2.6e-08	6.5	4.94	Obp83ef	CG31557	Odorant-binding protein 83ef
FBgn0052038	1639691_at	0.636	10.012	4e-09	2.6e-08	9.87	10.51	CG32038	CG32038	NA
FBgn0034029	1638841_at	0.482	8.555	4e-09	2.6e-08	8.37	8.85	eIF2B-gamma	CG8190	eIF2B-gamma
FBgn0033962	1629954_at	0.731	8.775	4e-09	2.6e-08	8.52	9.25	CG10153	CG10153	NA
FBgn0053087	1626279_at	-1.007	6.343	4e-09	2.6e-08	6.66	5.65	CG33087	CG33087	LDL receptor protein 1
FBgn0039941	1628847_a_at	-1.275	6.749	4e-09	2.6e-08	7.23	5.96	CG17167	CG17167	NA
FBgn0036290	1634838_at	1.595	5.528	4.1e-09	2.7e-08	5	6.6	CG10638	CG10638	NA
FBgn0259789	1638370_s_at	-3.257	7.24	4.1e-09	2.6e-08	8.41	5.15	vfl	CG12701	vielfaltig
FBgn0033605	1623322_at	0.579	8.332	4.1e-09	2.6e-08	8.13	8.71	CG9067	CG9067	NA
FBgn0033702	1632959_at	1.078	5.271	4.1e-09	2.7e-08	4.85	5.92	CG8854	CG8854	NA
FBgn0032916	1624665_at	-0.697	7.79	4.1e-09	2.7e-08	8.02	7.33	CG9257	CG9257	NA
FBgn0029709	1623771_at	0.586	10.502	4.1e-09	2.7e-08	10.27	10.86	CHOp24	CG3564	CHOp24
NA	1631016_at	-1.6	6.147	4.1e-09	2.7e-08	6.71	5.11	NA	NA	NA
FBgn0000251	1635796_a_at	-0.603	10.256	4.2e-09	2.7e-08	10.44	9.84	cad	CG1759	caudal
FBgn0027505	1635631_a_at	0.573	8.062	4.2e-09	2.7e-08	7.89	8.46	rab3-GAP	CG7061	rab3-GAP
FBgn0025352	1634869_at	-0.644	10.565	4.2e-09	2.7e-08	10.76	10.11	Thiolase	CG4581	Thiolase
FBgn0011695	1640565_at	0.513	13.24	4.2e-09	2.7e-08	13.13	13.64	PebIII	CG11390	Ejaculatory bulb protein III
FBgn0013998	1639023_at	0.685	8.925	4.2e-09	2.7e-08	8.72	9.4	Nsf2	CG33101	NEM-sensitive fusion protein 2
FBgn0038878	1628931_at	-0.976	6.663	4.2e-09	2.7e-08	6.93	5.96	CG3301	CG3301	NA
NA	1635666_at	-1.858	8.838	4.2e-09	2.7e-08	9.58	7.72	NA	NA	NA
FBgn0030653	1634351_at	-0.805	8.171	4.3e-09	2.8e-08	8.43	7.62	CG7860	CG7860	NA
FBgn0038972	1629546_at	0.541	9.932	4.3e-09	2.8e-08	9.69	10.23	CG7054	CG7054	NA
FBgn0022268	1641295_s_at	0.464	11.265	4.3e-09	2.8e-08	11.09	11.56	KdelR	CG5183	KDEL receptor
FBgn0033519	1635263_at	-1.223	7.508	4.3e-09	2.8e-08	8.01	6.78	CG11825	CG11825	NA
FBgn0031044	1629602_at	-0.797	8.331	4.3e-09	2.8e-08	8.6	7.8	MKP-4	CG14211	MAPK Phosphatase 4
FBgn0037182	1640293_s_at	0.723	10.207	4.3e-09	2.8e-08	9.95	10.68	CG6838	CG6838	NA
FBgn0031579	1640827_at	0.716	12.123	4.4e-09	2.8e-08	11.95	12.66	CG15422	CG15422	NA
FBgn0035169	1629606_at	-0.685	9.219	4.4e-09	2.8e-08	9.47	8.79	CG13890	CG13890	NA
FBgn0031256	1637650_at	0.823	10.112	4.4e-09	2.8e-08	9.79	10.61	CG4164	CG4164	NA
FBgn0030737	1627854_at	-1.032	10.611	4.4e-09	2.8e-08	10.93	9.9	CG9914	CG9914	NA
FBgn0040658	1638764_at	0.878	7.636	4.4e-09	2.8e-08	7.28	8.16	CG13516	CG13516	NA
FBgn0029173	1636844_at	-0.68	7.74	4.4e-09	2.8e-08	8.03	7.35	fu2	CG9233	fu2
FBgn0035374	1632280_at	0.41	8.922	4.4e-09	2.8e-08	8.8	9.21	mRpS35	CG2101	mitochondrial ribosomal protein S35
NA	1637594_at	1.443	5.891	4.4e-09	2.8e-08	5.51	6.95	NA	NA	NA
FBgn0034803	1638453_at	0.472	9.859	4.5e-09	2.9e-08	9.68	10.15	CG9849	CG9849	NA
FBgn0024289	1639892_at	-1.175	8.664	4.5e-09	2.9e-08	8.9	7.72	Sodh-1	CG1982	Sorbitol dehydrogenase 1
FBgn0039737	1635589_at	-0.63	12.522	4.5e-09	2.9e-08	12.73	12.1	CG7920	CG7920	NA
FBgn0259745	1639785_s_at	-1.212	8.354	4.5e-09	2.9e-08	8.89	7.67	wech	CG42396	wech
FBgn0038870	1624539_at	0.606	7.809	4.5e-09	2.9e-08	7.58	8.18	CG5871	CG5871	O-GlcNAcase
FBgn0028693	1640372_at	0.521	11.072	4.5e-09	2.9e-08	10.94	11.46	Rpn12	CG4157	Rpn12
NA	1641245_a_at	1.268	6.761	4.5e-09	2.9e-08	6.48	7.75	NA	NA	NA
FBgn0000986	1635766_at	-1.285	9.334	4.5e-09	2.9e-08	9.79	8.5	Fs(2)Ket	CG2637	NA
FBgn0033479	1638995_at	0.812	6.552	4.6e-09	2.9e-08	6.25	7.06	CG2292	CG2292	NA
FBgn0028475	1632236_at	0.594	9.341	4.6e-09	2.9e-08	9.14	9.73	CG10221	CG10221	NA
FBgn0030970	1627124_at	-0.71	8.815	4.7e-09	3e-08	9.07	8.36	CG7326	CG7326	NA
FBgn0036136	1641707_at	0.652	9.618	4.7e-09	3e-08	9.41	10.07	Ufd1-like	CG6233	Ubiquitin fusion-degradation 1-like
FBgn0036813	1635143_at	0.735	10.678	4.7e-09	3e-08	10.49	11.23	Aut1	CG6877	Aut1
FBgn0037046	1640845_at	1.157	6.837	4.7e-09	3e-08	6.35	7.51	CG10581	CG10581	NA
FBgn0033880	1636148_at	0.894	5.054	4.7e-09	3e-08	4.72	5.61	CG6553	CG6553	NA
FBgn0003870	1636673_s_at	0.978	9.021	4.7e-09	3e-08	8.78	9.76	ttk	CG1856	tramtrack
FBgn0051715	1633260_at	1.002	10.396	4.7e-09	3e-08	10.17	11.17	CG31715	CG31715	NA
FBgn0039875	1640897_at	0.503	9.516	4.7e-09	3e-08	9.31	9.81	sip3	CG1937	septin interacting protein 3
FBgn0033786	1628581_at	0.887	11.973	4.8e-09	3e-08	11.78	12.66	CG3884	CG3884	NA
FBgn0040290	1623031_a_at	-1.419	5.728	4.8e-09	3e-08	6.18	4.76	RecQ4	CG7487	RecQ4
FBgn0031161	1635057_s_at	0.782	9.026	4.8e-09	3e-08	8.71	9.49	CG15445	CG15445	NA
FBgn0037750	1632621_at	1.117	9.439	4.8e-09	3e-08	8.99	10.1	CG12946	CG12946	NA
FBgn0085421	1631112_at	1.593	8.144	4.9e-09	3.1e-08	7.71	9.31	Epac	CG34392	Epac
FBgn0035695	1632500_at	-1.171	5.945	4.9e-09	3.1e-08	6.33	5.15	CG10226	CG10226	NA
FBgn0036581	1631196_at	0.653	9.686	4.9e-09	3.1e-08	9.5	10.15	MED10	CG5057	Mediator complex subunit 10
FBgn0034951	1640415_at	0.87	10.524	4.9e-09	3.1e-08	10.23	11.09	CG3860	CG3860	NA
NA	1627173_at	0.704	9.092	4.9e-09	3.1e-08	8.93	9.63	NA	NA	NA
FBgn0030447	1633001_at	0.49	9.746	5e-09	3.1e-08	9.6	10.09	CG2200	CG2200	NA
FBgn0036271	1633523_at	0.941	9.451	5e-09	3.1e-08	9.14	10.08	Pbgs	CG10335	Porphobilinogen synthase
FBgn0005655	1623545_at	-1.209	9.478	5e-09	3.1e-08	9.94	8.73	mus209	CG9193	mutagen-sensitive 209
FBgn0036844	1637641_at	1.297	6.622	5e-09	3.1e-08	6.24	7.53	Mkp3	CG14080	Mitogen-activated protein kinase phosphatase 3
FBgn0031842	1635997_a_at	0.713	10.297	5e-09	3.1e-08	10.04	10.75	Tango1	CG11098	Transport and Golgi organization 1
FBgn0028394	1626011_at	0.633	8.275	5e-09	3.1e-08	8.08	8.71	CG17834	CG17834	NA
NA	1629619_at	0.745	5.47	5e-09	3.1e-08	5.2	5.94	NA	NA	NA
FBgn0032846	1637249_at	1.005	7.598	5.1e-09	3.2e-08	7.24	8.24	CG10721	CG10721	NA
FBgn0015797	1629797_at	0.791	9.23	5.1e-09	3.2e-08	8.98	9.78	Rab6	CG6601	Rab-protein 6
FBgn0039473	1634323_at	1.902	4.303	5.1e-09	3.2e-08	3.69	5.59	CG17191	CG17191	NA
FBgn0032281	1636330_at	1.781	7.637	5.2e-09	3.2e-08	7.02	8.8	CG17107	CG17107	NA
FBgn0000182	1631632_s_at	-5.024	8.576	5.2e-09	3.2e-08	10.24	5.22	BicC	CG4824	Bicaudal C
FBgn0034405	1627773_a_at	-0.703	11.295	5.2e-09	3.2e-08	11.51	10.81	Jheh2	CG15102	Juvenile hormone epoxide hydrolase 2
FBgn0040636	1635919_at	-1.234	9.956	5.2e-09	3.2e-08	10.33	9.1	CG13255	CG13255	NA
FBgn0031194	1632433_at	0.838	8.094	5.2e-09	3.3e-08	7.81	8.64	CG17598	CG17598	NA
FBgn0029769	1639642_a_at	-1.309	8.913	5.3e-09	3.3e-08	9.21	7.9	CG3239	CG3239	NA
FBgn0032882	1641469_at	0.506	7.379	5.3e-09	3.3e-08	7.24	7.75	ns4	CG9320	nucleostemin 4
FBgn0050272	1625760_at	-2.817	6.702	5.3e-09	3.3e-08	7.56	4.74	CG30272	CG30272	NA
FBgn0040268	1627866_at	-0.655	6.944	5.4e-09	3.3e-08	7.17	6.52	Top3alpha	CG10123	Topoisomerase 3alpha
FBgn0037109	1629111_at	-0.847	6.479	5.4e-09	3.3e-08	6.84	5.99	MED1	CG7162	Mediator complex subunit 1
FBgn0259784	1627897_at	-0.964	7.831	5.4e-09	3.4e-08	8.2	7.24	Det	CG12265	Deterin
NA	1624684_at	0.517	8.493	5.4e-09	3.4e-08	8.32	8.83	NA	NA	NA
FBgn0026376	1628726_s_at	-0.701	8.092	5.5e-09	3.4e-08	8.39	7.69	Rgl	CG8865	Ral guanine nucleotide exchange factor
FBgn0034723	1641120_at	1.096	11.186	5.5e-09	3.4e-08	10.96	12.06	CG13506	CG13506	NA
FBgn0027348	1634048_a_at	-0.888	10.077	5.5e-09	3.4e-08	10.35	9.46	bgm	CG4501	bubblegum
FBgn0036811	1637993_at	0.656	7.941	5.5e-09	3.4e-08	7.64	8.29	MED11	CG6884	Mediator complex subunit 11
FBgn0031459	1632642_a_at	-0.587	11.712	5.5e-09	3.4e-08	11.86	11.28	CG2862	CG2862	NA
FBgn0023512	1624008_at	0.506	9.294	5.5e-09	3.4e-08	9.14	9.65	eIF2B-epsilon	CG3806	eIF2B-epsilon
FBgn0040759	1628197_at	1.551	8.867	5.5e-09	3.4e-08	8.48	10.03	CG13177	CG13177	NA
FBgn0259169	1634481_at	0.57	9.204	5.5e-09	3.4e-08	9.04	9.61	RhoGAP18B	CG42274	NA
FBgn0020306	1636034_at	-0.981	7.851	5.6e-09	3.5e-08	8.23	7.25	dom	CG9696	domino
FBgn0004242	1636345_s_at	1.815	4.37	5.6e-09	3.4e-08	3.78	5.59	Syt1	CG3139	Synaptotagmin 1
FBgn0086758	1628005_at	1.457	5.794	5.6e-09	3.4e-08	5.49	6.94	chinmo	CG31666	Chronologically inappropriate morphogenesis
FBgn0060296	1628875_at	0.933	6.927	5.6e-09	3.4e-08	6.69	7.63	pain	CG15860	painless
FBgn0015558	1641265_at	-0.907	5.571	5.6e-09	3.5e-08	5.81	4.9	tty	CG1693	tweety
FBgn0004925	1632197_at	0.442	10.544	5.6e-09	3.4e-08	10.4	10.84	eIF-2alpha	CG9946	NA
NA	1626314_at	0.387	11.008	5.6e-09	3.4e-08	10.87	11.26	NA	NA	NA
FBgn0038053	1625324_at	-0.719	8.508	5.7e-09	3.5e-08	8.72	8	CG18549	CG18549	NA
FBgn0003965	1623355_at	-0.797	8.359	5.7e-09	3.5e-08	8.47	7.68	v	CG2155	vermilion
FBgn0029745	1627401_at	0.809	4.922	5.7e-09	3.5e-08	4.65	5.46	CG6789	CG6789	NA
FBgn0025815	1638575_at	-1.161	8.563	5.8e-09	3.5e-08	9.02	7.86	Mcm6	CG4039	Minichromosome maintenance 6
FBgn0037019	1640826_at	-0.496	9.505	5.8e-09	3.5e-08	9.66	9.17	CG3947	CG3947	peroxin 16
FBgn0024994	1639215_at	0.627	9.636	5.8e-09	3.6e-08	9.47	10.1	Csat	CG2675	Csat
FBgn0030334	1633385_at	1.952	6.663	5.9e-09	3.6e-08	6.08	8.03	Karl	CG4139	Karl
FBgn0030603	1640963_at	1.048	11.705	5.9e-09	3.6e-08	11.46	12.51	CG5541	CG5541	NA
FBgn0001226	1628117_at	-1.985	9.93	5.9e-09	3.6e-08	10.63	8.65	Hsp27	CG4466	Heat shock protein 27
FBgn0041629	1640957_at	0.973	8.378	5.9e-09	3.6e-08	7.97	8.94	Hexo2	CG1787	Hexosaminidase 2
FBgn0050151	1634789_at	0.811	8.384	6e-09	3.6e-08	8.13	8.94	CG30151	CG30151	NA
FBgn0050420	1636451_a_at	1.544	5.126	6e-09	3.7e-08	4.63	6.18	Atf-2	CG30420	Activating transcription factor-2
FBgn0030775	1631148_at	-0.49	12.838	6e-09	3.7e-08	12.97	12.48	CG9673	CG9673	NA
FBgn0031950	1635051_a_at	0.676	11.131	6e-09	3.7e-08	10.87	11.55	Herp	CG14536	Homocysteine-induced endoplasmic reticulum protein
FBgn0015550	1635026_at	1.549	5.429	6e-09	3.6e-08	4.94	6.49	tap	CG7659	NA
NA	1627236_s_at	1.553	7.124	6e-09	3.7e-08	6.64	8.19	NA	NA	NA
FBgn0034246	1641449_at	0.717	9.184	6.1e-09	3.7e-08	8.97	9.69	Dcr-2	CG6493	Dicer-2
FBgn0039559	1631009_at	-0.921	8.116	6.1e-09	3.7e-08	8.43	7.51	Mes-4	CG4976	Mes-4
FBgn0035444	1634135_at	0.689	10.156	6.1e-09	3.7e-08	9.96	10.65	CG12012	CG12012	NA
FBgn0040336	1628623_at	-0.685	9.805	6.1e-09	3.7e-08	9.9	9.22	CG9904	CG9904	Seipin
FBgn0026428	1632277_a_at	-1.023	8.908	6.1e-09	3.7e-08	9.19	8.16	HDAC6	CG6170	HDAC6
FBgn0032698	1623520_a_at	-1.382	6.262	6.1e-09	3.7e-08	6.81	5.43	CG10336	CG10336	NA
NA	1636217_at	-2.18	8.542	6.1e-09	3.7e-08	9.05	6.87	NA	NA	NA
FBgn0023540	1636461_at	-0.902	8.086	6.2e-09	3.7e-08	8.35	7.45	CG3630	CG3630	NA
FBgn0030738	1624064_at	-0.551	9.041	6.2e-09	3.8e-08	9.27	8.72	CG9915	CG9915	NA
FBgn0042135	1637352_a_at	0.831	10.965	6.2e-09	3.8e-08	10.74	11.57	CG18812	CG18812	NA
FBgn0035194	1629713_at	0.743	7.394	6.2e-09	3.7e-08	7.12	7.86	Psf1	CG9187	NA
FBgn0043455	1624613_at	0.404	8.539	6.3e-09	3.8e-08	8.45	8.85	CG5986	CG5986	NA
FBgn0021825	1638059_at	0.563	9.791	6.3e-09	3.8e-08	9.65	10.21	Dmn	CG8269	Dynamitin
FBgn0037926	1641298_at	0.551	7.515	6.3e-09	3.8e-08	7.3	7.86	CG10535	CG10535	Elongator complex protein 1
FBgn0024236	1641427_at	-0.567	8.88	6.3e-09	3.8e-08	9.04	8.47	foi	CG6817	fear-of-intimacy
FBgn0002527	1631380_s_at	0.971	8.028	6.3e-09	3.8e-08	7.79	8.77	LanB1	CG7123	NA
FBgn0037786	1638253_at	1.838	7.094	6.3e-09	3.8e-08	6.5	8.34	CG5361	CG5361	NA
FBgn0036423	1631465_at	-1.243	5.618	6.3e-09	3.8e-08	6.06	4.81	CG3919	CG3919	NA
FBgn0035089	1632591_at	2.194	9.624	6.4e-09	3.8e-08	9.05	11.24	Phk-3	CG9358	Pherokine 3
FBgn0038588	1628552_at	-1.019	7.47	6.4e-09	3.8e-08	7.88	6.86	CG7156	CG7156	NA
FBgn0027375	1628264_a_at	-0.628	7.527	6.4e-09	3.9e-08	7.71	7.08	RecQ5	CG4879	homolog of RecQ
FBgn0032467	1635208_at	0.471	8.902	6.4e-09	3.9e-08	8.75	9.23	CG9934	CG9934	NA
FBgn0259221	1627239_s_at	0.616	9.616	6.4e-09	3.9e-08	9.41	10.03	CG42321	CG42321	NA
FBgn0046114	1640552_at	-0.8	7.861	6.5e-09	3.9e-08	8.03	7.23	Gclm	CG4919	Glutamate-cysteine ligase modifier subunit
FBgn0025373	1628428_at	0.894	10.373	6.5e-09	3.9e-08	10.13	11.03	Fpps	CG12389	Farnesyl pyrophosphate synthase
FBgn0039626	1624639_at	0.608	7.671	6.5e-09	3.9e-08	7.5	8.1	Slu7	CG1420	Slu7
FBgn0086679	1625934_at	-0.665	8.392	6.5e-09	3.9e-08	8.59	7.92	p	CG9770	pink
FBgn0031661	1628521_at	1.116	9.031	6.5e-09	3.9e-08	8.75	9.87	Gmd	CG8890	GDP-mannose 4%2C6-dehydratase
FBgn0039537	1628432_at	-0.664	10.321	6.5e-09	3.9e-08	10.61	9.95	CG5590	CG5590	NA
FBgn0085203	1640652_at	0.774	7.022	6.5e-09	3.9e-08	6.8	7.57	CG34174	CG34174	NA
FBgn0024371	1627605_at	-0.874	9.021	6.5e-09	3.9e-08	9.3	8.43	E2f2	CG1071	E2F transcription factor 2
FBgn0033538	1636569_a_at	-0.585	6.474	6.5e-09	3.9e-08	6.73	6.15	CG11883	CG11883	NA
FBgn0038412	1637577_at	1.468	7.392	6.6e-09	3.9e-08	6.92	8.39	Zip3	CG6898	Zinc/iron regulated transporter-related protein 3
FBgn0002524	1626368_at	0.431	10.298	6.6e-09	3.9e-08	10.2	10.63	lace	CG4162	lace
FBgn0026319	1627704_a_at	1.532	6.631	6.6e-09	3.9e-08	6.17	7.7	Traf4	CG3048	TNF-receptor-associated factor 4
FBgn0038803	1636244_s_at	0.572	10.048	6.7e-09	4e-08	9.55	10.12	CG5191	CG5191	NA
FBgn0031990	1624826_at	0.612	9.87	6.7e-09	4e-08	9.65	10.26	CG8552	CG8552	NA
FBgn0032477	1638344_at	0.723	8.922	6.7e-09	4e-08	8.69	9.41	CG5287	CG5287	NA
FBgn0012034	1641148_a_at	-0.961	12.446	6.7e-09	4e-08	12.68	11.72	AcCoAS	CG9390	Acetyl Coenzyme A synthase
FBgn0036168	1632910_at	0.506	5.154	6.7e-09	4e-08	4.93	5.44	CG7512	CG7512	NA
FBgn0033137	1626351_at	1.651	5.204	6.7e-09	4e-08	4.73	6.38	Tsp42Ep	CG4471	NA
NA	1623027_s_at	2.904	10.4	6.7e-09	4e-08	9.14	12.05	NA	NA	NA
FBgn0086691	1634890_at	-0.684	10.768	6.8e-09	4e-08	10.97	10.29	UK114	CG15261	UK114
FBgn0035944	1632417_a_at	0.696	10.603	6.8e-09	4e-08	10.4	11.09	CG5021	CG5021	NA
NA	1624252_s_at	-1.01	8.741	6.8e-09	4e-08	9.11	8.1	NA	NA	NA
FBgn0034603	1626221_at	0.973	9.185	6.9e-09	4.1e-08	8.86	9.83	Glycogenin	CG9480	Glycogenin
FBgn0024991	1633835_s_at	-1	7.337	6.9e-09	4.1e-08	7.7	6.7	CG2694	CG2694	NA
FBgn0039453	1634142_at	-2.396	7.606	6.9e-09	4.1e-08	8.81	6.41	CG6403	CG6403	NA
FBgn0040153	1627653_at	-0.756	7.311	7e-09	4.1e-08	7.62	6.86	l(1)G0469	CG32597	lethal (1) G0469
FBgn0035995	1640582_at	0.622	10.345	7e-09	4.2e-08	10.25	10.88	CG3529	CG3529	NA
FBgn0030013	1628080_at	-1.311	9.705	7.1e-09	4.2e-08	10.11	8.8	GIIIspla2	CG1583	NA
FBgn0037526	1624666_at	0.567	6.943	7.1e-09	4.2e-08	6.77	7.34	CG10092	CG10092	NA
FBgn0025739	1628732_at	-1.319	6.151	7.1e-09	4.2e-08	6.66	5.34	pon	CG3346	partner of numb
NA	1630298_at	0.775	6.782	7.1e-09	4.2e-08	6.56	7.34	NA	NA	NA
FBgn0052675	1634561_s_at	0.797	8.1	7.2e-09	4.2e-08	7.82	8.61	Tango5	CG32675	Transport and Golgi organization 5
FBgn0042206	1627890_at	3.369	7.405	7.2e-09	4.3e-08	6.37	9.74	GstD10	CG18548	Glutathione S transferase D10
FBgn0036945	1633446_s_at	1.057	12.516	7.3e-09	4.3e-08	12.32	13.37	CG6981	CG6981	NA
FBgn0015034	1639539_at	-0.928	7.659	7.3e-09	4.3e-08	8.01	7.08	Cyp4e1	CG2062	Cytochrome P450-4e1
FBgn0036620	1634148_at	-1.27	5.917	7.3e-09	4.3e-08	6.35	5.08	CG4842	CG4842	NA
FBgn0038110	1622973_at	0.813	9.993	7.4e-09	4.3e-08	9.76	10.57	CG8031	CG8031	NA
FBgn0026084	1632105_a_at	0.881	11.914	7.4e-09	4.3e-08	11.75	12.63	cib	CG4944	ciboulot
FBgn0029508	1630145_s_at	0.814	9.773	7.4e-09	4.3e-08	9.55	10.36	Tsp42Ea	CG18817	Tetraspanin 42Ea
FBgn0032361	1631891_at	0.58	7.705	7.4e-09	4.3e-08	7.49	8.07	CG6488	CG6488	NA
FBgn0039831	1637162_at	0.639	8.576	7.4e-09	4.4e-08	8.31	8.95	CG12054	CG12054	NA
FBgn0052105	1625864_at	0.899	4.133	7.4e-09	4.4e-08	3.85	4.75	CG32105	CG32105	NA
FBgn0040650	1625166_at	-0.936	7.227	7.5e-09	4.4e-08	7.51	6.58	CG15456	CG15456	NA
FBgn0010391	1639135_at	0.508	10.079	7.5e-09	4.4e-08	9.85	10.36	Gtp-bp	CG2522	GTP-binding protein
FBgn0051200	1623969_at	1.019	7.675	7.5e-09	4.4e-08	7.12	8.14	CG31200	CG31200	NA
FBgn0035358	1627682_at	1.038	9.969	7.5e-09	4.4e-08	9.6	10.64	CG14949	CG14949	NA
FBgn0035110	1624390_a_at	0.541	9.236	7.6e-09	4.4e-08	9.08	9.62	thoc7	CG17143	thoc7
FBgn0040091	1632070_at	0.729	6.506	7.6e-09	4.4e-08	6.26	6.99	Ugt58Fa	CG4414	Ugt58Fa
FBgn0024329	1639526_a_at	0.484	9.195	7.6e-09	4.4e-08	9.11	9.59	Mekk1	CG7717	Mekk1
FBgn0030373	1634255_at	-2.156	5.775	7.6e-09	4.4e-08	6.61	4.45	CG12721	CG12721	NA
FBgn0050049	1626400_at	-1.785	6.412	7.6e-09	4.4e-08	6.83	5.04	CG30049	CG30049	NA
FBgn0034345	1634112_a_at	0.47	10.534	7.7e-09	4.5e-08	10.42	10.89	CG5174	CG5174	NA
FBgn0033437	1628625_at	1.58	9.812	7.7e-09	4.5e-08	9.38	10.96	CG12926	CG12926	NA
FBgn0043012	1627202_at	0.504	9.888	7.7e-09	4.5e-08	9.78	10.29	AP-2sigma	CG6056	AP-2sigma
FBgn0001179	1641306_at	0.814	7.757	7.7e-09	4.5e-08	7.47	8.29	hay	CG8019	haywire
FBgn0031081	1632972_at	0.884	8.007	7.7e-09	4.5e-08	7.69	8.57	Nep3	CG9565	Neprilysin 3
FBgn0052380	1626584_a_at	0.716	8.327	7.8e-09	4.5e-08	8.08	8.8	SMSr	CG32380	SMSr
FBgn0085205	1632575_at	0.502	11.88	7.8e-09	4.5e-08	11.75	12.26	CG34176	CG34176	NA
FBgn0086444	1635225_at	0.666	6.436	7.8e-09	4.5e-08	6.26	6.93	l(2)37Cb	CG10689	lethal (2) 37Cb
FBgn0033427	1639995_a_at	0.725	6.394	7.8e-09	4.5e-08	6.18	6.91	CG1868	CG1868	NA
FBgn0024332	1635234_at	-1.217	8.051	7.8e-09	4.5e-08	8.5	7.28	Mcm3	CG4206	Minichromosome maintenance 3
FBgn0037814	1628175_at	-0.608	8.374	7.8e-09	4.5e-08	8.6	7.99	CG6325	CG6325	NA
FBgn0001120	1633417_at	-4.495	8.443	7.9e-09	4.5e-08	9.97	5.47	gnu	CG5272	giant nuclei
FBgn0050269	1627958_at	1.11	11.379	7.9e-09	4.6e-08	11.13	12.24	CG30269	CG30269	NA
FBgn0032693	1625114_at	1.525	5.665	7.9e-09	4.5e-08	5.19	6.72	Cyp310a1	CG10391	NA
FBgn0033830	1635913_at	4.789	7.519	7.9e-09	4.6e-08	6.11	10.9	CG10814	CG10814	NA
FBgn0033413	1638735_at	-0.539	10.423	8e-09	4.6e-08	10.56	10.02	prel	CG8806	preli-like
FBgn0038760	1624006_at	0.531	7.212	8e-09	4.6e-08	7.06	7.59	MED25	CG12254	Mediator complex subunit 25
FBgn0010905	1630417_at	-1.101	7.543	8.1e-09	4.7e-08	7.87	6.77	Spn	CG16757	Spinophilin
FBgn0051755	1631937_at	-1.366	5.731	8.1e-09	4.6e-08	6.19	4.82	CG31755	CG31755	NA
FBgn0010278	1624815_at	0.887	8.621	8.1e-09	4.7e-08	8.37	9.26	Ssrp	CG4817	Structure specific recognition protein
FBgn0034931	1633294_at	0.742	6.246	8.2e-09	4.7e-08	5.99	6.73	CG2812	CG2812	NA
FBgn0051547	1629256_a_at	0.859	8.903	8.2e-09	4.7e-08	8.5	9.36	CG31547	CG31547	NA
FBgn0029689	1633363_at	0.505	9.522	8.2e-09	4.7e-08	9.3	9.81	CG6428	CG6428	NA
FBgn0033434	1628929_s_at	1.095	11.259	8.2e-09	4.7e-08	10.97	12.06	CG1902	CG1902	NA
FBgn0002719	1629095_a_at	-1.081	12.171	8.2e-09	4.7e-08	12.44	11.36	Men	CG10120	Malic enzyme
FBgn0085282	1626303_s_at	0.96	7.564	8.3e-09	4.8e-08	7.19	8.15	CG34253	CG34253	NA
FBgn0032805	1629121_at	1.651	8.069	8.3e-09	4.7e-08	7.6	9.25	CG10337	CG10337	NA
FBgn0036501	1634684_at	1.206	10.109	8.3e-09	4.7e-08	9.57	10.77	CG7272	CG7272	NA
FBgn0013263	1628275_at	1.14	5.094	8.3e-09	4.7e-08	4.74	5.88	Trl	CG33261	Trithorax-like
FBgn0028836	1623891_at	0.6	8.855	8.3e-09	4.7e-08	8.68	9.28	CSN7	CG2038	COP9 complex homolog subunit 7
FBgn0036354	1636210_at	-1.274	6.836	8.4e-09	4.8e-08	7.35	6.07	CG10191	CG10191	Proteome of centrioles 1
FBgn0011606	1624632_at	-1.173	7.539	8.4e-09	4.8e-08	7.97	6.79	Klp3A	CG8590	Kinesin-like protein at 3A
FBgn0033019	1629101_a_at	-0.632	8.147	8.4e-09	4.8e-08	8.44	7.81	CG10395	CG10395	NA
NA	1635975_s_at	0.732	7.536	8.4e-09	4.8e-08	7.3	8.03	NA	NA	NA
FBgn0034176	1624905_at	0.48	9.897	8.7e-09	4.9e-08	9.75	10.22	ste24a	CG9000	prenyl protease type I
FBgn0039494	1641496_a_at	1.088	7.673	8.8e-09	5e-08	7.28	8.37	grass	CG5896	Gram-positive Specific Serine protease
FBgn0034035	1639358_at	0.666	8.411	8.8e-09	5e-08	8.22	8.89	CG8207	CG8207	NA
FBgn0035644	1630620_at	-1.234	6.716	8.8e-09	5e-08	7.14	5.9	Pole2	CG10489	Pole2
FBgn0039900	1627821_s_at	1.328	5.203	8.8e-09	5e-08	4.71	6.04	Syt7	CG2381	Syt7
FBgn0038569	1640980_at	0.409	7.868	8.8e-09	5e-08	7.71	8.11	CG7218	CG7218	NA
FBgn0030813	1633764_a_at	-1.411	5.514	8.9e-09	5e-08	6.05	4.64	CG4949	CG4949	NA
FBgn0036194	1625173_s_at	0.811	9.068	8.9e-09	5e-08	8.71	9.52	CG11652	CG11652	NA
FBgn0003048	1638200_at	0.692	7.32	8.9e-09	5e-08	7.11	7.8	pcx	CG3443	pecanex
FBgn0001075	1624125_at	1.64	4.902	8.9e-09	5.1e-08	4.42	6.06	ft	CG3352	fat
FBgn0032499	1631738_at	0.606	7.923	9e-09	5.1e-08	7.74	8.34	CG6116	CG6116	NA
FBgn0003345	1625515_a_at	0.649	10.183	9e-09	5.1e-08	10.04	10.69	sd	CG8544	scalloped
FBgn0003660	1637089_at	0.556	11.414	9.1e-09	5.1e-08	11.23	11.79	Syb	CG12210	Synaptobrevin
FBgn0039158	1641700_at	0.598	7.119	9.2e-09	5.2e-08	6.87	7.47	CG6182	CG6182	NA
FBgn0000256	1637398_a_at	-0.821	8.465	9.2e-09	5.2e-08	8.73	7.91	capu	CG3399	cappuccino
FBgn0031485	1637143_at	0.508	7.886	9.2e-09	5.2e-08	7.69	8.2	CG9643	CG9643	NA
FBgn0051875	1634584_at	-0.787	6.707	9.2e-09	5.2e-08	6.97	6.18	CG31875	CG31875	NA
FBgn0017448	1638154_at	-0.676	9.366	9.3e-09	5.3e-08	9.59	8.91	CG2187	CG2187	NA
FBgn0035151	1640281_s_at	-1.139	6.756	9.4e-09	5.3e-08	7.22	6.08	CG17129	CG17129	NA
FBgn0052137	1625087_a_at	0.729	10.486	9.4e-09	5.3e-08	10.24	10.96	CG32137	CG32137	NA
NA	1641346_at	-0.787	8.147	9.4e-09	5.3e-08	8.46	7.67	NA	NA	NA
FBgn0032400	1627538_at	-0.564	12.826	9.5e-09	5.3e-08	13.05	12.48	CG6770	CG6770	NA
FBgn0033815	1628768_at	-0.878	5.801	9.5e-09	5.3e-08	6.08	5.2	CG4676	CG4676	NA
FBgn0036486	1637163_at	-1.627	7.398	9.5e-09	5.4e-08	7.93	6.31	Msh6	CG7003	Msh6
FBgn0036827	1640282_at	0.819	8.074	9.5e-09	5.4e-08	7.82	8.64	CG6843	CG6843	NA
FBgn0016054	1635020_s_at	-1.314	7.376	9.6e-09	5.4e-08	7.82	6.51	phr6-4	CG2488	(6-4)-photolyase
FBgn0039920	1639182_at	-1.072	5.454	9.7e-09	5.4e-08	5.8	4.72	CG11360	CG11360	NA
FBgn0052017	1634093_at	1.989	7.115	9.7e-09	5.4e-08	6.33	8.32	CG32017	CG32017	NA
FBgn0037537	1628404_at	0.41	9.368	9.7e-09	5.4e-08	9.23	9.64	CG2767	CG2767	NA
NA	1638489_at	-1.294	5.799	9.7e-09	5.4e-08	6.24	4.95	NA	NA	NA
FBgn0029970	1637523_at	-1.247	5.338	9.8e-09	5.5e-08	5.83	4.59	Nek2	CG17256	Nek2
FBgn0039711	1630214_a_at	-0.745	8.022	9.8e-09	5.5e-08	8.3	7.55	CG7824	CG7824	NA
FBgn0051633	1623426_at	0.57	8.679	9.8e-09	5.5e-08	8.53	9.09	CG31633	CG31633	NA
FBgn0005634	1627840_a_at	0.92	11.159	9.8e-09	5.5e-08	10.99	11.91	zip	CG15792	zipper
FBgn0035842	1629069_at	-1.496	6.498	9.9e-09	5.5e-08	7.04	5.54	CG7504	CG7504	NA
FBgn0036565	1625310_at	-1.378	6.485	1e-08	5.6e-08	7.05	5.68	CG5235	CG5235	NA
FBgn0053494	1629181_at	-0.806	11.202	1e-08	5.6e-08	11.41	10.6	CG33494	CG33494	NA
FBgn0032701	1634705_at	0.565	8.105	1e-08	5.7e-08	7.92	8.49	CG10341	CG10341	NA
FBgn0014127	1627999_s_at	-0.988	7.552	1e-08	5.7e-08	7.94	6.95	barr	CG10726	barren
FBgn0031119	1640796_a_at	-0.689	7.457	1e-08	5.7e-08	7.75	7.06	CG1812	CG1812	NA
FBgn0259735	1625230_a_at	0.918	9.253	1e-08	5.7e-08	8.91	9.83	CG42389	CG42389	NA
FBgn0036984	1632238_at	1.643	5.304	1e-08	5.7e-08	4.83	6.47	CG13248	CG13248	NA
FBgn0031495	1639579_s_at	0.493	8.208	1e-08	5.7e-08	8.04	8.54	CG17257	CG17257	beta4GalNAcTB pilot
FBgn0086532	1625352_s_at	0.6	9.063	1e-08	5.7e-08	8.93	9.53	Spt-I	CG4016	Serine palmitoyltransferase subunit I
FBgn0030010	1632913_at	-1.017	6.64	1e-08	5.8e-08	6.97	5.95	CG10959	CG10959	NA
FBgn0036890	1626057_a_at	1.101	3.558	1e-08	5.8e-08	3.19	4.29	CG9368	CG9368	NA
FBgn0004430	1634493_at	-1.109	6.902	1e-08	5.8e-08	7.29	6.18	LysS	CG1165	NA
FBgn0038595	1635282_at	1.736	7.305	1e-08	5.8e-08	6.89	8.63	CG7142	CG7142	NA
NA	1637473_s_at	0.533	8.154	1e-08	5.7e-08	7.99	8.53	NA	NA	NA
NA	1639759_s_at	-0.968	9.219	1e-08	5.7e-08	9.59	8.62	NA	NA	NA
FBgn0030746	1634903_at	-1.448	5.202	1e-08	5.8e-08	5.8	4.35	CG9981	CG9981	NA
FBgn0005630	1637581_at	-1.042	5.796	1.1e-08	5.9e-08	6.22	5.18	lola	CG12052	longitudinals lacking
FBgn0027341	1635696_s_at	0.989	4.945	1.1e-08	6.1e-08	4.55	5.53	Gfat1	CG12449	Glutamine:fructose-6-phosphate aminotransferase 1
FBgn0002781	1624020_at	-1.076	6.71	1.1e-08	6e-08	7.12	6.04	mod(mdg4)	CG32491	modifier of mdg4
FBgn0038341	1623624_at	1.01	7.806	1.1e-08	5.8e-08	7.42	8.43	CG14869	CG14869	NA
FBgn0013432	1630672_at	0.648	9.271	1.1e-08	5.9e-08	9.08	9.73	bcn92	CG3717	bcn92
FBgn0025687	1623787_at	0.919	7.635	1.1e-08	5.9e-08	7.34	8.26	LKR	CG7144	lysine ketoglutarate reductase
FBgn0034278	1637274_at	1.291	4.123	1.1e-08	5.9e-08	3.7	4.99	CG14488	CG14488	NA
FBgn0014857	1627685_a_at	0.609	11.461	1.1e-08	5.9e-08	11.32	11.93	His3.3A	CG5825	Histone H3.3A
FBgn0043001	1637610_at	-0.93	8.13	1.1e-08	5.9e-08	8.54	7.61	Chrac-16	CG15736	Chrac-16
FBgn0033994	1638318_at	-0.873	5.968	1.1e-08	5.9e-08	6.3	5.42	CG7544	CG7544	NA
FBgn0022800	1623418_at	0.998	7.03	1.1e-08	5.9e-08	6.64	7.64	Cad96Ca	CG10244	Cad96Ca
FBgn0015035	1623068_at	-2.884	9.361	1.1e-08	5.9e-08	10.41	7.53	Cyp4e3	CG4105	Cytochrome P450-4e3
FBgn0043070	1636999_a_at	0.774	8.398	1.1e-08	5.9e-08	8.2	8.98	MESK2	CG15669	Misexpression suppressor of KSR 2
FBgn0028331	1628453_at	0.56	11.807	1.1e-08	6e-08	11.63	12.19	l(1)G0289	CG2221	lethal (1) G0289
FBgn0010380	1638673_at	0.502	11.018	1.1e-08	6e-08	10.87	11.38	Bap	CG12532	Beta Adaptin
FBgn0034697	1632677_a_at	0.504	9.75	1.1e-08	6.1e-08	9.58	10.08	GM130	CG11061	GM130
FBgn0086695	1632243_at	-1.375	6.78	1.1e-08	6.2e-08	7.27	5.9	hd	CG2669	humpty dumpty
FBgn0030500	1630409_at	-1.164	6.97	1.1e-08	6.2e-08	7.37	6.2	Ndc80	CG9938	Ndc80
FBgn0028940	1629009_at	2.154	9.542	1.1e-08	6.2e-08	8.8	10.95	Cyp28a5	CG8864	Cyp28a5
FBgn0040551	1634106_at	0.989	11.244	1.1e-08	6.2e-08	11.08	12.07	CG11686	CG11686	NA
FBgn0039736	1636979_at	-0.733	7.371	1.1e-08	6e-08	7.16	6.43	CG7912	CG7912	NA
FBgn0031747	1641070_at	2.18	7.116	1.1e-08	6.1e-08	5.91	8.09	CG9021	CG9021	NA
FBgn0033592	1633066_at	1.377	7.841	1.1e-08	6e-08	7.81	9.19	CG13215	CG13215	NA
FBgn0039528	1630639_at	0.823	10.051	1.2e-08	6.4e-08	9.81	10.63	dsd	CG5634	distracted
FBgn0033465	1628777_at	-0.669	9.61	1.2e-08	6.4e-08	9.8	9.13	CG12140	CG12140	NA
FBgn0052702	1641037_at	1.647	8.048	1.2e-08	6.4e-08	7.4	9.05	CG32702	CG32702	NA
FBgn0085446	1628465_a_at	-0.517	10.805	1.2e-08	6.5e-08	10.97	10.45	CG34417	CG34417	NA
FBgn0040723	1634657_at	0.799	11.511	1.2e-08	6.5e-08	11.26	12.06	CG5011	CG5011	NA
FBgn0024326	1630916_at	0.924	9.475	1.2e-08	6.5e-08	9.21	10.13	Mkk4	CG9738	MAP kinase kinase 4
FBgn0030336	1629983_at	-0.584	9.036	1.2e-08	6.5e-08	9.27	8.69	CG1578	CG1578	NA
FBgn0028700	1634081_at	-0.889	8.528	1.2e-08	6.6e-08	8.86	7.97	RfC38	CG6258	Replication factor C 38kD subunit
FBgn0037149	1627908_at	-1.481	6.94	1.2e-08	6.6e-08	7.52	6.04	CG14561	CG14561	NA
FBgn0035033	1623207_at	-0.955	7.647	1.2e-08	6.6e-08	8	7.04	CG3548	CG3548	NA
FBgn0003076	1633803_at	-1.127	11.307	1.2e-08	6.6e-08	11.54	10.41	Pgm	CG5165	Phosphogluconate mutase
FBgn0051953	1626850_s_at	0.969	7.243	1.2e-08	6.6e-08	6.96	7.92	CG31953	CG31953	NA
FBgn0025639	1629866_at	-0.644	8.12	1.2e-08	6.7e-08	8.39	7.75	Suv4-20	CG13363	Histone methyltransferase 4-20
FBgn0035438	1628257_s_at	0.388	12.479	1.2e-08	6.7e-08	12.36	12.75	PHGPx	CG12013	PHGPx
FBgn0052190	1624685_at	0.791	10.753	1.2e-08	6.7e-08	10.45	11.24	NUCB1	CG32190	NUCB1
FBgn0030938	1637642_at	-1.432	6.246	1.2e-08	6.4e-08	6.74	5.31	CG15047	CG15047	NA
FBgn0035313	1640810_at	0.807	4.755	1.2e-08	6.5e-08	4.5	5.31	CG13810	CG13810	NA
NA	1627552_at	-1.435	11.855	1.2e-08	6.7e-08	12.58	11.15	NA	NA	NA
FBgn0027596	1623036_a_at	0.718	9.317	1.3e-08	6.8e-08	9.02	9.74	CG10249	CG10249	NA
FBgn0035588	1640492_at	-0.992	10.724	1.3e-08	6.8e-08	11	10.01	CG10672	CG10672	NA
FBgn0027561	1629030_a_at	0.728	8.904	1.3e-08	6.8e-08	8.73	9.46	CG18659	CG18659	NA
FBgn0035583	1636910_at	0.936	12.205	1.3e-08	6.8e-08	12.03	12.97	CG13704	CG13704	NA
FBgn0031769	1626682_s_at	-1.257	7.814	1.3e-08	6.8e-08	8.3	7.04	CG9135	CG9135	NA
FBgn0036372	1633108_at	0.817	10.852	1.3e-08	6.8e-08	10.63	11.45	CG10083	CG10083	NA
FBgn0038761	1623690_at	0.599	9.019	1.3e-08	6.9e-08	8.81	9.41	CG17190	CG17190	NA
FBgn0025743	1630341_at	-0.801	8.287	1.3e-08	6.9e-08	8.62	7.82	mbt	CG18582	mushroom bodies tiny
FBgn0030959	1640361_at	-0.672	9.202	1.3e-08	6.9e-08	9.51	8.84	CG6961	CG6961	NA
FBgn0037746	1628297_a_at	-1.268	6.583	1.3e-08	6.9e-08	7.18	5.91	CG8478	CG8478	NA
FBgn0022764	1628903_s_at	-1.238	5.658	1.3e-08	6.9e-08	6.12	4.88	Sin3A	CG8815	Sin3A
FBgn0026565	1641357_at	-1.478	10.25	1.3e-08	6.9e-08	10.71	9.24	CG1315	CG1315	NA
FBgn0030645	1640298_at	0.633	7.369	1.3e-08	6.9e-08	7.13	7.76	CG6308	CG6308	NA
FBgn0024841	1630167_at	-0.624	9.262	1.3e-08	6.9e-08	9.49	8.87	Pcd	CG1963	pterin-4a-carbinolamine dehydratase
FBgn0030251	1632636_at	-0.788	10.242	1.3e-08	7e-08	10.48	9.69	CG2145	CG2145	NA
FBgn0030670	1627102_at	0.537	11.82	1.3e-08	7e-08	11.68	12.22	Pis	CG9245	Phosphatidylinositol synthase
FBgn0030699	1631790_at	0.672	8.997	1.3e-08	7e-08	8.82	9.49	CG8578	CG8578	NA
FBgn0031848	1624160_at	-1.545	6.557	1.3e-08	7.1e-08	7.15	5.6	CG11329	CG11329	NA
FBgn0040299	1631085_a_at	0.915	7.891	1.3e-08	7.1e-08	7.66	8.58	Myo28B1	CG6976	Myo28B1
FBgn0010173	1627380_at	0.776	10.555	1.3e-08	7.1e-08	10.34	11.11	RpA-70	CG9633	Replication Protein A 70
FBgn0027093	1627148_at	0.5	9.392	1.3e-08	7.1e-08	9.23	9.73	Aats-arg	CG9020	Arginyl-tRNA synthetase
FBgn0037981	1628456_at	0.742	7.58	1.3e-08	7.1e-08	7.31	8.06	Spt3	CG3169	Spt3
FBgn0053193	1628053_at	0.485	8.205	1.3e-08	7.2e-08	8.1	8.59	sav	CG33193	salvador
FBgn0003559	1628686_a_at	0.495	7.569	1.3e-08	7.2e-08	7.42	7.92	su(f)	CG17170	suppressor of forked
FBgn0065032	1623961_at	1.107	11.018	1.3e-08	7.2e-08	10.77	11.88	Arpc3B	CG8936	Arpc3B
FBgn0039519	1633947_at	-1.416	8.354	1.3e-08	7.1e-08	9.01	7.59	Cyp6a18	CG13977	NA
NA	1625968_at	0.458	9.359	1.3e-08	7e-08	9.18	9.64	NA	NA	NA
FBgn0003660	1635944_a_at	0.565	10.902	1.4e-08	7.2e-08	10.75	11.31	Syb	CG12210	Synaptobrevin
FBgn0035725	1633850_at	-0.973	6.523	1.4e-08	7.2e-08	6.94	5.97	Mis12	CG18156	Mis12
FBgn0001247	1625496_at	0.53	9.737	1.4e-08	7.2e-08	9.55	10.08	Ide	CG5517	Insulin degrading metalloproteinase
FBgn0028382	1623009_at	0.482	8.383	1.4e-08	7.3e-08	8.21	8.69	cyp33	CG4886	cyclophilin-33
FBgn0004397	1631535_at	0.756	9.647	1.4e-08	7.4e-08	9.5	10.25	Vinc	CG3299	Vinculin
FBgn0003068	1638452_at	0.691	6.336	1.4e-08	7.4e-08	6.11	6.8	per	CG2647	period
FBgn0031099	1638247_at	0.541	7.977	1.4e-08	7.5e-08	7.79	8.33	CG17065	CG17065	NA
FBgn0064766	1635979_at	0.609	9.105	1.4e-08	7.5e-08	8.88	9.49	CG7600	CG7600	NA
FBgn0033942	1638869_at	0.828	8.89	1.4e-08	7.6e-08	8.69	9.52	Cpr51A	CG10112	Cuticular protein 51A
FBgn0015925	1640862_a_at	-0.533	8.053	1.4e-08	7.6e-08	8.26	7.73	csul	CG3730	capsuleen
FBgn0037723	1630830_a_at	-1.1	6.704	1.4e-08	7.6e-08	6.92	5.82	SpdS	CG8327	Spermidine Synthase
FBgn0035948	1632376_at	1.252	4.651	1.4e-08	7.6e-08	4.33	5.59	CG5644	CG5644	NA
FBgn0033783	1638208_at	0.513	10.403	1.4e-08	7.6e-08	10.24	10.75	CG17019	CG17019	NA
FBgn0011760	1634599_s_at	0.572	10.893	1.4e-08	7.6e-08	10.73	11.31	ctp	CG6998	cut up
FBgn0037603	1630057_at	0.514	9.088	1.4e-08	7.7e-08	8.96	9.47	CG11753	CG11753	NA
NA	1630309_s_at	0.581	9.67	1.4e-08	7.2e-08	9.5	10.08	NA	NA	NA
NA	1626178_s_at	0.896	9.08	1.4e-08	7.2e-08	8.82	9.71	NA	NA	NA
FBgn0033527	1635506_at	0.857	7.926	1.5e-08	7.7e-08	7.62	8.47	CG11777	CG11777	NA
FBgn0036826	1639485_at	-1.01	7.568	1.5e-08	7.7e-08	7.95	6.94	CG3893	CG3893	NA
FBgn0030519	1634720_at	-0.618	12.566	1.5e-08	7.7e-08	12.8	12.18	CG11151	CG11151	NA
FBgn0033859	1629918_at	0.629	7.788	1.5e-08	7.9e-08	7.61	8.24	CG6197	CG6197	NA
FBgn0023441	1630930_a_at	-0.649	10.019	1.5e-08	8e-08	10.24	9.59	fus	CG8205	fusilli
FBgn0033750	1633644_at	0.932	6.134	1.5e-08	8e-08	5.78	6.71	CG13151	CG13151	NA
FBgn0010235	1626731_at	0.466	10.172	1.5e-08	8e-08	10.06	10.53	Klc	CG5433	Kinesin light chain
NA	1641272_at	0.69	9.264	1.5e-08	7.7e-08	9.02	9.71	NA	NA	NA
NA	1623648_s_at	0.999	10.033	1.5e-08	7.7e-08	9.79	10.79	NA	NA	NA
FBgn0039206	1637397_a_at	-0.826	6.701	1.5e-08	7.8e-08	6.98	6.15	ana1	CG6631	NA
NA	1640362_at	-1.641	6.293	1.5e-08	7.9e-08	6.9	5.26	NA	NA	NA
FBgn0031408	1628938_at	0.739	9.557	1.5e-08	7.7e-08	9.29	10.02	CG10882	CG10882	NA
NA	1637542_s_at	0.768	7.152	1.5e-08	7.8e-08	6.92	7.69	NA	NA	NA
FBgn0003165	1632418_s_at	-1.126	8.607	1.6e-08	8.1e-08	9.06	7.94	pum	CG9755	pumilio
FBgn0050008	1633675_at	-0.654	12.657	1.6e-08	8.2e-08	12.94	12.28	CG30008	CG30008	NA
FBgn0030847	1635980_s_at	0.707	9.327	1.6e-08	8.2e-08	9.07	9.78	CG12991	CG12991	NA
FBgn0031610	1631699_at	-1.032	6.784	1.6e-08	8.2e-08	7.2	6.17	CG15436	CG15436	NA
FBgn0039323	1638388_at	2.664	8.225	1.6e-08	8.2e-08	7.24	9.91	CG10559	CG10559	NA
FBgn0040251	1641242_at	1.859	6.367	1.6e-08	8.2e-08	5.91	7.77	Ugt86Di	CG6658	Ugt86Di
FBgn0000482	1623139_at	0.74	7.07	1.6e-08	8.2e-08	6.83	7.57	dor	CG3093	deep orange
FBgn0086372	1636846_at	0.705	4.304	1.6e-08	8.3e-08	4.19	4.89	lap	CG2520	like-AP180
FBgn0021795	1638890_at	0.41	12.027	1.6e-08	8.3e-08	11.85	12.26	Tapdelta	CG9035	Translocon-associated protein delta
FBgn0030347	1640950_at	1.155	10.213	1.6e-08	8.3e-08	10.01	11.16	CG15739	CG15739	NA
FBgn0015316	1636611_at	-3.376	7.461	1.6e-08	8.3e-08	8.83	5.45	Try29F	CG9564	Trypsin 29F
FBgn0028327	1626456_at	0.497	10.601	1.6e-08	8.3e-08	10.42	10.92	l(1)G0320	CG32701	lethal (1) G0320
FBgn0033761	1627526_at	0.513	9.437	1.6e-08	8.3e-08	9.31	9.83	CG8778	CG8778	NA
FBgn0027287	1627550_a_at	0.697	9.522	1.6e-08	8.4e-08	9.33	10.03	Gmap	CG33206	Golgi microtubule-associated protein
FBgn0038893	1628796_at	0.858	6.113	1.6e-08	8.4e-08	5.85	6.7	CG6353	CG6353	NA
FBgn0031607	1629144_at	0.629	7.626	1.6e-08	8.5e-08	7.42	8.05	CG15440	CG15440	NA
FBgn0037299	1636038_at	0.442	9.116	1.6e-08	8.5e-08	9	9.44	CG1115	CG1115	NA
FBgn0052379	1628355_at	-1.118	6.942	1.6e-08	8.2e-08	6.97	5.85	CG32379	CG32379	NA
FBgn0034160	1629201_at	-2.677	9.631	1.6e-08	8.3e-08	11.03	8.35	CG5550	CG5550	NA
FBgn0039596	1638273_at	1.715	6.61	1.6e-08	8.6e-08	6.22	7.93	CG10000	CG10000	NA
FBgn0052750	1634445_at	-1.677	6.821	1.6e-08	8.3e-08	7.41	5.74	CG32750	CG32750	NA
NA	1636615_at	0.948	7.327	1.6e-08	8.2e-08	7.05	8	NA	NA	NA
FBgn0035950	1641681_s_at	-0.87	10.216	1.6e-08	8.2e-08	10.41	9.54	CG5288	CG5288	NA
FBgn0002968	1637463_a_at	1.084	8.289	1.7e-08	8.8e-08	7.99	9.07	Nrg	CG1634	Neuroglian
FBgn0028936	1630412_at	0.655	6.978	1.7e-08	8.6e-08	6.7	7.35	nimB5	CG16873	nimrod B5
FBgn0050431	1635271_at	-1.026	8.173	1.7e-08	8.6e-08	8.4	7.37	CG30431	CG30431	NA
FBgn0039727	1633846_at	0.694	7.035	1.7e-08	8.8e-08	6.78	7.47	CG15523	CG15523	NA
FBgn0001319	1639479_a_at	0.768	3.959	1.7e-08	8.8e-08	3.74	4.51	kn	CG10197	knot
FBgn0027945	1626366_at	-0.937	10.79	1.7e-08	8.8e-08	10.97	10.04	ppl	CG7758	pumpless
FBgn0031781	1636770_at	0.618	11.201	1.7e-08	8.9e-08	11.07	11.68	Arc-p20	CG5972	Arc-p20
FBgn0039636	1631515_at	0.641	8.497	1.7e-08	8.9e-08	8.24	8.88	CG11877	CG11877	NA
FBgn0000392	1633092_at	-0.731	10.21	1.7e-08	8.9e-08	10.48	9.75	cup	CG11181	cup
FBgn0033468	1632991_at	0.719	7.802	1.7e-08	9e-08	7.52	8.23	CG1418	CG1418	NA
FBgn0037556	1640558_a_at	-0.65	8.301	1.7e-08	9e-08	8.57	7.92	CG9636	CG9636	NA
FBgn0028516	1639619_a_at	0.86	8.544	1.7e-08	9e-08	8.22	9.08	ZnT35C	CG3994	NA
FBgn0259140	1636984_at	2.95	6.986	1.7e-08	8.9e-08	5.91	8.86	CG42255	CG42255	NA
NA	1634097_s_at	1.259	7.586	1.7e-08	8.9e-08	6.96	8.22	NA	NA	NA
FBgn0035496	1628332_at	-1.447	6.742	1.7e-08	8.8e-08	7.11	5.66	CG14990	CG14990	NA
FBgn0086712	1639259_at	0.599	7.928	1.8e-08	9e-08	7.73	8.33	Egm	CG9006	Enigma
FBgn0021814	1637893_at	0.554	9.531	1.8e-08	9e-08	9.37	9.92	Vps28	CG12770	Vacuolar protein sorting 28
FBgn0032006	1638143_a_at	0.738	8.966	1.8e-08	9e-08	8.78	9.52	Pvr	CG8222	PDGF- and VEGF-receptor related
FBgn0259168	1630945_at	-1.15	4.67	1.8e-08	9e-08	5.14	3.99	mnb	CG42273	minibrain
FBgn0037688	1629472_s_at	0.402	7.491	1.8e-08	9.1e-08	7.37	7.77	CG9356	CG9356	NA
FBgn0036020	1635293_s_at	0.491	8.785	1.8e-08	9.1e-08	8.65	9.14	CG8336	CG8336	NA
FBgn0040843	1627583_at	-0.72	7.497	1.8e-08	9.2e-08	7.68	6.96	CG15213	CG15213	NA
FBgn0030291	1625320_at	-0.732	7.072	1.8e-08	9.2e-08	7.38	6.65	CG1738	CG1738	NA
FBgn0036991	1635168_at	-0.705	7.439	1.8e-08	9.2e-08	7.69	6.98	CG5872	CG5872	NA
FBgn0032430	1636003_at	0.562	8.115	1.8e-08	9.2e-08	7.89	8.45	CG6388	CG6388	NA
FBgn0014075	1624465_at	0.713	9.155	1.8e-08	9.2e-08	8.89	9.61	Ugt	CG6850	UDP-glucose-glycoprotein glucosyltransferase
FBgn0036007	1640075_a_at	-0.629	11.303	1.8e-08	9.2e-08	11.45	10.82	path	CG3424	pathetic
FBgn0040734	1631660_at	1.271	11.752	1.8e-08	9.2e-08	11.47	12.74	CG15065	CG15065	NA
FBgn0038016	1638609_s_at	0.686	8.497	1.8e-08	9.2e-08	8.3	8.99	MBD-R2	CG10042	MBD-R2
FBgn0000635	1640163_at	1.173	7.073	1.8e-08	9.2e-08	6.8	7.97	Fas2	CG3665	Fasciclin 2
FBgn0032896	1637797_at	-1.521	7.821	1.8e-08	9.2e-08	8.24	6.72	CG14400	CG14400	NA
FBgn0030342	1635911_s_at	0.565	8.403	1.8e-08	9.3e-08	8.23	8.79	CG10347	CG10347	NA
FBgn0001324	1628801_at	0.57	7.249	1.8e-08	9.3e-08	7.07	7.64	kto	CG8491	kohtalo
FBgn0039697	1641659_s_at	-0.47	11.996	1.8e-08	9.4e-08	12.14	11.67	CG7834	CG7834	NA
FBgn0026076	1624675_at	0.423	10.321	1.8e-08	9.4e-08	10.22	10.64	UBL3	CG9038	UBL3
FBgn0032435	1630804_at	0.917	9.604	1.8e-08	9.1e-08	9.46	10.38	Oatp33Eb	CG6417	NA
FBgn0024273	1641653_at	0.991	10.427	1.9e-08	9.8e-08	10.18	11.17	WASp	CG1520	WASp
FBgn0036135	1624278_at	0.515	8.345	1.9e-08	9.5e-08	8.16	8.68	mRpL2	CG7636	mitochondrial ribosomal protein L2
FBgn0029507	1635191_at	0.726	12.356	1.9e-08	9.5e-08	12.23	12.96	Tsp42Ed	CG12846	Tetraspanin 42Ed
FBgn0028470	1630683_at	-0.629	8.926	1.9e-08	9.6e-08	9.22	8.59	Patr-1	CG5208	Protein associated with topo II related - 1
FBgn0024432	1627017_at	0.427	10.74	1.9e-08	9.6e-08	10.69	11.11	Dlc90F	CG12363	Dynein light chain 90F
FBgn0003514	1624065_at	0.878	12.092	1.9e-08	9.7e-08	11.92	12.79	sqh	CG3595	spaghetti squash
FBgn0038303	1632765_at	0.507	7.996	1.9e-08	9.7e-08	7.85	8.36	CG6623	CG6623	Shal Interactor of Di-Leucine Motif
FBgn0032620	1624937_at	-1.006	7.319	1.9e-08	9.7e-08	7.75	6.75	CG12288	CG12288	NA
FBgn0052672	1639467_at	0.397	12.909	1.9e-08	9.7e-08	12.79	13.19	Atg8a	CG32672	Autophagy-specific gene 8a
FBgn0014135	1627135_at	1.113	7.69	1.9e-08	9.8e-08	7.32	8.43	bnl	CG4608	branchless
NA	1626038_at	-0.481	9.808	1.9e-08	9.6e-08	10	9.52	NA	NA	NA
FBgn0052053	1634185_at	0.696	7.186	1.9e-08	9.5e-08	7.08	7.78	CG32053	CG32053	NA
FBgn0035607	1633214_at	-3.084	6.719	1.9e-08	9.7e-08	7.74	4.66	CG4835	CG4835	NA
NA	1640488_a_at	-0.749	9.938	1.9e-08	9.7e-08	10.2	9.45	NA	NA	NA
FBgn0086349	1632161_at	0.93	8.045	1.9e-08	9.8e-08	7.75	8.68	nbs	CG6754	NA
FBgn0032124	1639990_at	1.083	7.984	1.9e-08	9.5e-08	7.68	8.77	CG17855	CG17855	NA
FBgn0033301	1623018_at	0.919	11.607	2e-08	9.9e-08	11.59	12.5	CG12780	CG12780	NA
FBgn0025635	1628960_s_at	-0.712	7.861	2e-08	1e-07	8.15	7.44	CG17829	CG17829	NA
FBgn0037248	1631087_a_at	-0.515	8.57	2e-08	1e-07	8.75	8.23	Spargel	CG9809	Spargel
FBgn0022246	1634798_at	0.68	7.553	2e-08	1e-07	7.31	7.99	Rpp30	CG11606	RNaseP protein p30
FBgn0035001	1623189_at	0.534	10.556	2e-08	1e-07	10.42	10.95	slik	CG4527	Sterile20-like kinase
FBgn0037906	1630741_s_at	1.036	9.101	2e-08	1e-07	8.82	9.85	PGRP-LB	CG14704	Peptidoglycan recognition protein LB
FBgn0035854	1631965_at	0.561	7.164	2e-08	1e-07	6.95	7.52	CG8005	CG8005	NA
FBgn0031575	1632753_a_at	-0.815	6.787	2e-08	1e-07	7.09	6.28	Cep97	CG3980	NA
FBgn0039170	1627127_at	-1.393	5.388	2e-08	1e-07	5.96	4.56	CG13609	CG13609	NA
FBgn0066101	1637280_at	-0.984	10.584	2e-08	1e-07	10.92	9.94	LpR1	CG31094	Lipophorin receptor 1
FBgn0036691	1641256_at	0.529	8.037	2e-08	1e-07	7.87	8.4	beg	CG7842	bad egg
FBgn0029114	1637481_at	-0.773	7.573	2e-08	1e-07	7.85	7.07	Tollo	CG6890	Tollo
FBgn0029128	1631714_a_at	0.626	5.815	2e-08	1e-07	5.67	6.29	SP71	CG17131	trynity
FBgn0004237	1639118_a_at	0.684	10.409	2e-08	1e-07	10.16	10.84	Hrb87F	CG12749	Heterogeneous nuclear ribonucleoprotein at 87F
FBgn0086768	1626213_a_at	0.369	9.41	2e-08	1e-07	9.27	9.64	Pcmt	CG2152	Protein-L-isoaspartate (D-aspartate) O-methyltransferase
FBgn0004509	1635138_at	0.872	8.189	2e-08	1e-07	7.89	8.77	Fur1	CG10772	Furin 1
FBgn0039476	1635045_at	1.189	6.447	2e-08	9.9e-08	5.99	7.18	CG6271	CG6271	NA
FBgn0033792	1625235_at	-2.031	8.281	2e-08	1e-07	8.76	6.73	CG13325	CG13325	NA
FBgn0010241	1638775_at	-1.988	8.913	2.1e-08	1e-07	9.1	7.12	Mdr50	CG8523	Multi drug resistance 50
FBgn0051778	1636682_at	-1.421	8.571	2.1e-08	1e-07	8.92	7.5	CG31778	CG31778	NA
FBgn0050423	1625714_a_at	0.654	11.574	2.1e-08	1e-07	11.4	12.06	CG30423	CG30423	NA
FBgn0036713	1638305_at	1.217	6.572	2.1e-08	1e-07	6	7.22	Mip	CG6456	Myoinhibiting peptide precursor
FBgn0086898	1638064_a_at	-1.038	6.065	2.1e-08	1.1e-07	6.49	5.45	dgo	CG12342	diego
FBgn0036759	1628682_at	-0.816	9.248	2.1e-08	1.1e-07	9.43	8.62	CG5577	CG5577	NA
FBgn0051158	1633026_a_at	0.662	9.062	2.1e-08	1.1e-07	8.9	9.56	CG31158	CG31158	NA
FBgn0050197	1634388_at	0.571	11.273	2.1e-08	1.1e-07	11.12	11.69	CG30197	CG30197	NA
FBgn0036448	1635842_at	0.869	10.195	2.1e-08	1.1e-07	9.96	10.83	mop	CG9311	myopic
FBgn0011774	1640431_at	0.823	8.086	2.1e-08	1.1e-07	7.84	8.66	Irbp	CG5247	Inverted repeat-binding protein
FBgn0035043	1625816_at	0.807	9.582	2.1e-08	1e-07	9.42	10.23	CG4781	CG4781	NA
FBgn0003944	1633550_a_at	-0.618	6.377	2.1e-08	1.1e-07	6.54	5.92	Ubx	CG10388	NA
[truncated: 7,949 more rows]
[truncated: 3 more columns]

## Sheet: totalRNA_LongLivedMutant-UASCtr
Ensembl.Gene.ID	ID	logFC	AveExpr	P.Value	adj.P.Val	UAScontrol_Mean	longLivedMutant_Mean	symbols	FLYBASECG	Description
NA	1627886_at	3.439	11.168	8e-16	7.8e-12	9.82	13.3	NA	NA	NA
FBgn0010425	1637492_at	-3.091	12.532	1.1e-13	5.5e-10	13.61	10.66	epsilonTry	CG18681	epsilonTrypsin
FBgn0039471	1635868_at	-4.751	11.466	3.1e-13	1e-09	13.22	8.53	CG6295	CG6295	NA
FBgn0031945	1627069_at	2.21	8.705	3.8e-12	9.3e-09	7.77	10.11	CG7191	CG7191	NA
FBgn0023197	1624824_at	-1.68	13.312	8.8e-12	1.7e-08	13.93	12.27	Jon74E	CG6298	Jonah 74E
FBgn0002939	1632705_at	-3.191	8.286	1.7e-11	2.7e-08	9.5	6.28	ninaD	CG31783	neither inactivation nor afterpotential D
FBgn0033774	1638361_at	-2.08	13.535	5.7e-11	8e-08	14.33	12.24	CG12374	CG12374	NA
FBgn0003996	1624393_at	2.499	7.458	8.6e-11	8.9e-08	7.52	8.4	w	CG2759	white
FBgn0039296	1623247_at	2.09	8.596	9.7e-11	8.9e-08	7.88	9.84	CG10420	CG10420	NA
FBgn0039472	1629308_at	-6.559	9.631	9.9e-11	8.9e-08	11.96	5.59	CG17192	CG17192	NA
FBgn0039342	1634240_at	-3.454	12.544	1e-10	8.9e-08	13.81	10.4	CG5107	CG5107	NA
FBgn0039326	1638226_at	1.136	11.323	2.3e-10	1.8e-07	10.96	11.99	CG10562	CG10562	NA
FBgn0033477	1627152_at	1.217	10.325	5.2e-10	3.8e-07	9.93	11.04	CG12918	CG12918	NA
FBgn0039114	1636510_a_at	-1.393	11.668	5.8e-10	3.8e-07	12.09	10.86	Lsd-1	CG10374	Lipid storage droplet-1
NA	1633401_s_at	-1.796	8.029	5.8e-10	3.8e-07	8.68	6.93	NA	NA	NA
FBgn0031484	1625524_at	1.628	9.337	7.4e-10	4.5e-07	9.11	10.12	CG3165	CG3165	NA
FBgn0030098	1634076_at	-1.433	13.351	7.9e-10	4.6e-07	13.93	12.43	CG12057	CG12057	NA
FBgn0020906	1627869_at	-2.586	11.779	1.3e-09	7e-07	12.66	10.21	Jon25Bi	CG8867	Jonah 25Bi
FBgn0259711	1632958_a_at	0.96	7.77	1.4e-09	7.2e-07	7.34	8.39	CG42365	CG42365	NA
FBgn0027095	1639410_at	0.913	10.999	1.8e-09	8.8e-07	10.71	11.54	Manf	CG7013	Mesencephalic astrocyte-derived neurotrophic factor
FBgn0035343	1640881_at	3.488	10.443	2e-09	9.1e-07	9.22	12.65	CG16762	CG16762	NA
FBgn0039788	1634343_at	1.597	5.211	2.1e-09	9.3e-07	4.62	6.19	Rpt6R	CG2241	NA
FBgn0031547	1624817_at	2.093	7.62	2.4e-09	1e-06	6.97	8.85	Sr-CIV	CG3212	NA
FBgn0037976	1633651_at	1.445	9.418	2.5e-09	1e-06	8.91	10.25	Tk	CG14734	Tachykinin
FBgn0032913	1635498_at	-1.592	11.169	2.6e-09	1e-06	11.85	10.13	CG9259	CG9259	NA
FBgn0039470	1632215_at	-3.748	9.197	3e-09	1.1e-06	10.42	6.92	CG6296	CG6296	NA
FBgn0038484	1640355_at	-3	11.62	3.1e-09	1.1e-06	12.65	9.78	CG5246	CG5246	NA
FBgn0038039	1623448_at	0.799	9.348	3.2e-09	1.1e-06	9.05	9.83	CG5196	CG5196	NA
FBgn0035176	1637224_at	3.282	11.3	3.3e-09	1.1e-06	10.02	13.39	CG13905	CG13905	NA
FBgn0020414	1626301_at	1.061	6.014	3.7e-09	1.2e-06	5.68	6.64	Idgf3	CG4559	Imaginal disc growth factor 3
FBgn0038718	1627080_at	-1.402	10.858	4e-09	1.3e-06	11.38	9.98	CG17752	CG17752	NA
FBgn0032734	1623841_at	1.321	7.068	4.3e-09	1.3e-06	6.58	7.84	CG15169	CG15169	NA
FBgn0001258	1635227_at	1.398	10.433	4.7e-09	1.4e-06	9.82	11.36	ImpL3	CG10160	Ecdysone-inducible gene L3
FBgn0030348	1638778_at	1.783	5.583	7.2e-09	2e-06	4.97	6.68	CG10352	CG10352	NA
FBgn0085313	1638809_at	1.339	10.75	7.3e-09	2e-06	10.16	11.64	CG34284	CG34284	NA
FBgn0250757	1630249_at	0.865	8.29	8e-09	2.2e-06	8.04	8.78	CG42235	CG42235	NA
NA	1633642_at	-1.794	7.434	8.4e-09	2.2e-06	8.09	6.33	NA	NA	NA
FBgn0035996	1626220_at	1.809	7.863	8.5e-09	2.2e-06	7.27	8.97	CG3448	CG3448	NA
FBgn0036415	1639564_a_at	0.904	6.377	9.4e-09	2.4e-06	6.08	6.9	CG7768	CG7768	NA
FBgn0035620	1637660_at	-2.439	10.66	1.2e-08	2.9e-06	11.59	9.08	CG5150	CG5150	NA
FBgn0039325	1627144_at	-1.143	10.755	1.3e-08	3.2e-06	11.32	9.97	CG10560	CG10560	NA
FBgn0032068	1625374_at	-2.41	8.971	1.4e-08	3.2e-06	9.91	7.45	CG9466	CG9466	NA
FBgn0035619	1636287_at	-2.262	11.217	1.4e-08	3.2e-06	12.05	9.76	CG10592	CG10592	NA
FBgn0010357	1630320_at	-0.656	14.04	1.6e-08	3.5e-06	14.28	13.64	betaTry	CG18211	betaTrypsin
FBgn0031654	1639196_at	-2.612	11.065	1.6e-08	3.5e-06	12.04	9.44	Jon25Bii	CG8869	Jonah 25Bii
FBgn0038179	1635294_at	1.408	8.755	1.6e-08	3.5e-06	8.34	9.58	CG9312	CG9312	NA
FBgn0033945	1635030_at	1.213	9.683	1.8e-08	3.8e-06	9.09	10.52	CG12868	CG12868	NA
FBgn0039006	1630802_at	1.341	8.981	2e-08	4e-06	8.51	9.8	Cyp6d4	CG12800	Cyp6d4
NA	1629675_at	-1.541	4.819	2e-08	4e-06	5.29	3.91	NA	NA	NA
FBgn0030593	1631072_at	-1.096	11.021	2.3e-08	4.5e-06	11.56	10.28	CG9512	CG9512	NA
NA	1624027_at	0.618	8.511	2.3e-08	4.4e-06	8.25	8.9	NA	NA	NA
FBgn0004595	1635500_a_at	1.214	6.992	2.6e-08	4.9e-06	6.64	7.7	pros	CG17228	prospero
FBgn0025678	1626196_at	1.097	10.447	2.9e-08	5.2e-06	10.1	11.1	CaBP1	CG5809	CaBP1
FBgn0039562	1636528_at	1.131	10.883	3e-08	5.2e-06	10.59	11.53	Gp93	CG5520	Glycoprotein 93
FBgn0001218	1635423_s_at	0.74	12.307	3e-08	5.2e-06	12.1	12.74	Hsc70-3	CG4147	Heat shock protein cognate 3
FBgn0030594	1631420_at	-0.913	12.576	3e-08	5.2e-06	12.86	12.03	CG9509	CG9509	NA
FBgn0028523	1635109_at	1.077	7.036	3.1e-08	5.2e-06	6.59	7.75	CG5888	CG5888	NA
FBgn0020623	1632701_at	1.298	6.734	3.1e-08	5.2e-06	6.17	7.55	Pal	CG5472	NA
FBgn0034045	1640126_at	1.13	7.741	3.3e-08	5.4e-06	7.36	8.44	CG8249	CG8249	NA
FBgn0037718	1641563_at	0.696	10.78	3.4e-08	5.4e-06	10.59	11.17	P58IPK	CG8286	P58IPK
FBgn0028684	1629676_at	0.472	10.77	3.4e-08	5.4e-06	10.59	11.06	Tbp-1	CG10370	Tat-binding protein-1
FBgn0040262	1629836_at	1.366	6.667	3.4e-08	5.4e-06	6.37	7.34	Ugt36Ba	CG13270	NA
FBgn0031294	1637378_s_at	1.263	10.21	3.8e-08	5.9e-06	9.75	10.94	ia2	CG31795	IA-2 ortholog
FBgn0032049	1635453_at	-0.724	13.919	4e-08	6.1e-06	14.19	13.46	Bace	CG13095	beta-site APP-cleaving enzyme
FBgn0037934	1624692_at	0.862	10.801	4.1e-08	6.1e-06	10.69	11.21	CG6830	CG6830	NA
FBgn0033928	1632639_at	1.764	7.961	4.1e-08	6.1e-06	7.34	9.09	Arc2	CG13941	Arc2
FBgn0259152	1623888_at	0.498	8.954	4.2e-08	6.2e-06	8.77	9.27	Clbn	CG11847	Caliban
FBgn0035165	1626382_s_at	0.62	11.82	4.4e-08	6.3e-06	11.62	12.2	CG13887	CG13887	NA
FBgn0032048	1630467_a_at	1.486	8.093	4.4e-08	6.3e-06	7.56	8.99	Dh31	CG13094	Diuretic hormone 31
FBgn0051148	1637647_at	0.806	11.691	4.7e-08	6.5e-06	11.39	12.18	CG31148	CG31148	NA
FBgn0035934	1639767_at	1.46	6.208	4.7e-08	6.5e-06	5.72	7.04	TrpA1	CG5751	NA
FBgn0037391	1633771_s_at	1.274	9.51	5.1e-08	7e-06	9.04	10.31	CG2017	CG2017	NA
FBgn0036848	1631127_at	-0.488	8.74	5.5e-08	7.4e-06	8.77	8.55	CG10424	CG10424	NA
FBgn0031010	1637575_at	1.291	8.81	5.7e-08	7.5e-06	8.19	9.68	CG8028	CG8028	NA
FBgn0054026	1636470_at	-0.813	11.345	5.8e-08	7.5e-06	11.58	10.88	CG34026	CG34026	NA
FBgn0041707	1636249_at	1.145	8.217	6.2e-08	7.9e-06	7.81	8.9	7B2	CG1168	7B2
FBgn0036738	1629476_at	-1.227	12.591	6.5e-08	8.2e-06	13.05	11.8	CG7542	CG7542	NA
FBgn0050022	1628558_at	0.943	9.932	6.6e-08	8.2e-06	9.59	10.5	CG30022	CG30022	NA
FBgn0039311	1623265_at	-1.308	11.213	6.9e-08	8.4e-06	11.96	10.2	CG10513	CG10513	NA
FBgn0028695	1637349_at	0.441	9.967	6.9e-08	8.4e-06	9.79	10.25	Rpn1	CG7762	Rpn1
FBgn0038302	1628896_a_at	0.759	9.275	7.3e-08	8.8e-06	9.01	9.71	CG4210	CG4210	NA
FBgn0031881	1629040_at	0.585	8.551	7.5e-08	8.9e-06	8.43	8.83	CG3476	CG3476	NA
FBgn0037151	1628660_at	0.886	7.485	8.6e-08	1e-05	7.1	8.06	CG7130	CG7130	NA
FBgn0038957	1624405_a_at	-1.89	6.946	8.9e-08	1e-05	7.68	5.76	CG7059	CG7059	NA
FBgn0036126	1628683_at	0.731	8.913	1e-07	1.2e-05	8.62	9.38	CG6272	CG6272	NA
FBgn0036919	1628710_at	0.609	8.421	1e-07	1.2e-05	8.21	8.77	Grasp65	CG7809	Grasp65
FBgn0014469	1627844_at	-0.582	12.225	1.1e-07	1.2e-05	12.45	11.86	Cyp4e2	CG2060	Cytochrome P450-4e2
FBgn0033672	1627697_at	0.467	8.378	1.1e-07	1.2e-05	8.19	8.67	rho-7	CG8972	rhomboid-7
FBgn0250820	1625250_at	0.516	10.398	1.1e-07	1.2e-05	10.21	10.7	CG5802	CG5802	NA
FBgn0031633	1635482_at	0.589	9.381	1.2e-07	1.3e-05	9.11	9.78	CG2976	CG2976	NA
FBgn0039737	1628339_a_at	1.234	10.334	1.2e-07	1.3e-05	10.1	10.92	CG7920	CG7920	NA
FBgn0033296	1639262_at	-1.327	10.386	1.3e-07	1.4e-05	10.98	9.51	CG11669	CG11669	NA
FBgn0004926	1636176_at	0.472	11.457	1.4e-07	1.4e-05	11.3	11.73	eIF-2beta	CG4153	Eukaryotic initiation factor 2beta
FBgn0031115	1640187_a_at	0.471	8.211	1.4e-07	1.4e-05	8.03	8.5	CG11710	CG11710	NA
FBgn0030614	1623482_at	1.533	4.352	1.4e-07	1.5e-05	3.77	5.35	CG9072	CG9072	NA
NA	1639430_at	0.464	8.483	1.4e-07	1.4e-05	8.27	8.79	NA	NA	NA
FBgn0051272	1639934_at	1.325	10.179	1.5e-07	1.5e-05	9.66	11.05	CG31272	CG31272	NA
FBgn0035708	1624347_s_at	1.428	5.597	1.5e-07	1.5e-05	5.1	6.47	CG8398	CG8398	NA
FBgn0037786	1638253_at	1.382	6.975	1.5e-07	1.5e-05	6.35	7.9	CG5361	CG5361	NA
FBgn0032336	1634436_at	0.729	11.204	1.6e-07	1.6e-05	10.97	11.62	Ast-C	CG14919	Allatostatin C
FBgn0003358	1624092_at	-2.584	9.727	1.6e-07	1.6e-05	10.65	8.05	Jon99Ci	CG31039	Jonah 99Ci
FBgn0086134	1635872_at	0.401	11.66	1.7e-07	1.6e-05	11.47	11.93	Pros25	CG5266	Proteasome 25kD subunit
FBgn0001149	1628353_at	0.593	13.256	1.7e-07	1.6e-05	13.03	13.63	GstD1	CG10045	Glutathione S transferase D1
FBgn0035409	1638974_at	1.113	9.615	1.7e-07	1.6e-05	9.17	10.32	CG14963	CG14963	NA
FBgn0039319	1633857_at	1.72	9.192	1.8e-07	1.6e-05	8.7	10.22	CG13659	CG13659	NA
FBgn0050287	1627091_at	0.706	5.02	1.8e-07	1.6e-05	4.68	5.49	CG30287	CG30287	NA
FBgn0037852	1641606_s_at	0.549	9.002	1.9e-07	1.7e-05	8.78	9.34	CG6608	CG6608	Thiamine pyrophosphate carrier protein 1
FBgn0052068	1639857_at	-0.516	11.481	2e-07	1.8e-05	11.64	11.17	CG32068	CG32068	NA
FBgn0025454	1625697_at	-0.713	13.461	2e-07	1.8e-05	13.62	13.08	Cyp6g1	CG8453	Cyp6g1
FBgn0015282	1630788_at	0.521	10.653	2e-07	1.8e-05	10.45	10.98	Pros26.4	CG5289	Proteasome 26S subunit subunit 4 ATPase
FBgn0031935	1633780_at	-1.131	6.87	2.1e-07	1.8e-05	6.86	6.44	CG13793	CG13793	NA
FBgn0025724	1635871_at	0.552	9.746	2.1e-07	1.8e-05	9.58	10.07	beta'Cop	CG6699	beta'-coatomer protein
FBgn0031267	1628514_at	1.104	9.959	2.1e-07	1.8e-05	9.54	10.66	Ipk2	CG13688	Ipk2
FBgn0020369	1639784_at	0.414	11.069	2.2e-07	1.9e-05	10.89	11.34	Pros45	CG1489	Pros45
FBgn0039106	1631913_at	1.036	5.188	2.2e-07	1.9e-05	4.8	5.81	CG10301	CG10301	NA
FBgn0015039	1635008_at	1.091	11.44	2.3e-07	1.9e-05	11.01	12.12	Cyp9b2	CG4486	Cytochrome P450-9b2
FBgn0029766	1640884_at	1.218	11.172	2.3e-07	1.9e-05	10.71	11.96	CG15784	CG15784	NA
FBgn0036210	1629287_at	0.628	7.393	2.3e-07	1.9e-05	7.11	7.8	CG14130	CG14130	NA
FBgn0052195	1640590_at	0.759	8.914	2.4e-07	2e-05	8.67	9.35	CG32195	CG32195	NA
FBgn0038658	1635724_at	0.553	13.224	2.5e-07	2e-05	13.04	13.57	CG14292	CG14292	NA
NA	1634786_at	1.601	8.197	2.5e-07	2e-05	8.13	8.89	NA	NA	NA
FBgn0025620	1641711_at	-0.963	9.251	2.6e-07	2.1e-05	9.73	8.57	CG13360	CG13360	NA
FBgn0039254	1627165_a_at	0.551	6.742	2.6e-07	2.1e-05	6.53	7.07	Nmnat	CG13645	Nicotinamide mononucleotide adenylyltransferase
FBgn0036300	1636257_at	0.705	10.107	2.6e-07	2.1e-05	9.86	10.52	CG10688	CG10688	NA
FBgn0029937	1635581_at	0.775	7.992	2.8e-07	2.2e-05	7.72	8.49	CG8300	CG8300	NA
FBgn0034736	1628645_at	1.354	8.869	2.8e-07	2.2e-05	8.72	9.53	CG6018	CG6018	NA
NA	1635709_at	0.473	10.748	2.8e-07	2.2e-05	10.62	11.02	NA	NA	NA
FBgn0039294	1639044_at	2.088	5.051	2.9e-07	2.2e-05	4.32	6.36	Cad96Cb	CG13664	NA
FBgn0261396	1628269_at	0.456	10.469	3e-07	2.3e-05	10.28	10.76	Rpn3	CG42641	Regulatory particle non-ATPase 3
FBgn0033216	1625129_at	-1.94	7.987	3.1e-07	2.3e-05	8.63	6.76	CG1946	CG1946	NA
FBgn0001977	1627249_a_at	0.589	9.265	3.2e-07	2.4e-05	9.05	9.64	l(2)35Bg	CG4180	lethal (2) 35Bg
FBgn0031520	1626081_at	1.253	7.042	3.5e-07	2.6e-05	6.85	7.68	CG8837	CG8837	NA
NA	1632652_s_at	1.031	9.65	3.5e-07	2.6e-05	9.32	10.26	NA	NA	NA
FBgn0035871	1622979_a_at	0.53	11.772	3.6e-07	2.6e-05	11.58	12.1	CG7188	CG7188	NA
FBgn0036271	1633523_at	0.663	9.395	3.7e-07	2.7e-05	9.12	9.81	Pbgs	CG10335	Porphobilinogen synthase
FBgn0011769	1627945_at	0.44	8.556	3.7e-07	2.7e-05	8.41	8.81	Fdxh	CG4205	Ferredoxin
FBgn0037312	1623356_at	0.522	9.316	3.8e-07	2.7e-05	9.17	9.59	CG11999	CG11999	NA
FBgn0035714	1626412_at	0.537	9.276	3.8e-07	2.7e-05	9.05	9.62	CG8549	CG8549	NA
FBgn0044810	1625164_at	5.128	8.236	4e-07	2.8e-05	6.61	11.4	TotX	CG31193	Turandot X
FBgn0030797	1626688_at	0.578	7.287	4.1e-07	2.9e-05	7.06	7.65	CG13004	CG13004	NA
NA	1627525_a_at	0.586	9.413	4.1e-07	2.9e-05	9.17	9.79	NA	NA	NA
FBgn0010044	1634554_at	2.745	7.261	4.2e-07	2.9e-05	6.18	9.06	GstD8	CG4421	Glutathione S transferase D8
FBgn0023179	1625280_at	1.032	6.043	4.4e-07	3e-05	5.67	6.65	amon	CG6438	amontillado
FBgn0050360	1637567_at	-0.746	12.713	4.5e-07	3.1e-05	12.97	12.26	CG30360	CG30360	Maltase A6
FBgn0005585	1639441_at	0.54	11.751	4.7e-07	3.1e-05	11.59	12.07	Crc	CG9429	Calreticulin
FBgn0037996	1623398_at	-2.392	8.689	4.7e-07	3.1e-05	9.48	7.24	CG4830	CG4830	NA
FBgn0026190	1640004_at	-0.506	4.867	4.8e-07	3.2e-05	5.03	4.58	PH4alphaMP	CG9726	NA
FBgn0063494	1625744_at	0.87	10.907	4.9e-07	3.2e-05	10.66	11.42	GstE6	CG17530	Glutathione S transferase E6
FBgn0086699	1628830_at	0.726	6.419	5.1e-07	3.3e-05	6.25	6.83	l(3)S147910	CG14121	NA
FBgn0034716	1627078_at	0.685	10.457	5.3e-07	3.4e-05	10.2	10.89	Oatp58Dc	CG3380	Organic anion transporting polypeptide 58Dc
FBgn0054010	1637173_at	0.777	5.706	5.5e-07	3.6e-05	5.59	6.09	CG34010	CG34010	NA
FBgn0039580	1635153_at	0.489	10.259	5.8e-07	3.7e-05	10.11	10.55	Gfat2	CG1345	Glutamine:fructose-6-phosphate aminotransferase 2
FBgn0031701	1623635_at	5.543	8.928	5.9e-07	3.7e-05	7	12.41	TotM	CG14027	Turandot M
FBgn0033221	1630003_at	0.523	11.528	5.9e-07	3.7e-05	11.31	11.86	CG12825	CG12825	NA
FBgn0261393	1641650_at	0.672	9.702	6.1e-07	3.8e-05	9.52	10.08	alpha-Est5	CG1089	alpha-Esterase-5
FBgn0004430	1634493_at	-0.98	6.839	6.1e-07	3.8e-05	7.23	6.23	LysS	CG1165	NA
FBgn0259682	1640505_at	-0.78	9.195	6.2e-07	3.8e-05	9.41	8.74	CG42351	CG42351	NA
FBgn0030506	1641252_at	0.609	7.317	6.9e-07	4.2e-05	7.13	7.67	Lig4	CG12176	Ligase4
FBgn0038719	1629718_at	-1.129	8.14	6.9e-07	4.2e-05	8.49	7.49	CG16727	CG16727	NA
NA	1630948_s_at	1.124	6.421	7e-07	4.3e-05	6.02	7.06	NA	NA	NA
FBgn0031603	1628516_at	0.397	7.726	7.1e-07	4.3e-05	7.57	7.97	CG15432	CG15432	NA
FBgn0035906	1627845_at	0.348	11.227	7.1e-07	4.3e-05	11.06	11.46	CG6673	CG6673	NA
FBgn0052179	1628325_at	0.635	8.711	7.2e-07	4.3e-05	8.44	9.11	Krn	CG32179	Keren
FBgn0063499	1628328_at	0.878	9.646	7.2e-07	4.3e-05	9.35	10.16	GstE10	CG17522	NA
FBgn0036745	1628883_at	0.512	9.747	7.4e-07	4.4e-05	9.57	10.05	CG7484	CG7484	NA
FBgn0063491	1628657_at	-0.523	12.159	7.5e-07	4.4e-05	12.36	11.84	GstE9	CG17534	Glutathione S transferase E9
FBgn0036481	1624787_s_at	0.808	4.268	7.8e-07	4.5e-05	3.86	4.85	CG16959	CG16959	NA
FBgn0038199	1629448_at	1.075	7.694	7.8e-07	4.5e-05	7.32	8.33	CG14358	CG14358	CCHamide-1
FBgn0036122	1631994_a_at	1.221	8.153	7.9e-07	4.6e-05	7.71	8.94	Mocs1	CG33048	NA
FBgn0036552	1624975_at	0.767	8.306	8.1e-07	4.6e-05	8	8.8	CG17028	CG17028	NA
FBgn0031925	1639170_at	1.319	4.489	8.2e-07	4.7e-05	4.18	5.18	Cyp4d21	CG6730	Cyp4d21
FBgn0038020	1636174_at	1.967	9.709	8.4e-07	4.8e-05	9	10.94	GstD9	CG10091	Glutathione S transferase D9
FBgn0036196	1640228_at	0.771	8.671	8.4e-07	4.8e-05	8.32	9.18	CG11658	CG11658	NA
FBgn0023529	1628194_at	0.488	10.788	8.8e-07	4.9e-05	10.68	11.05	CG2918	CG2918	NA
FBgn0030013	1628080_at	-0.909	9.757	8.8e-07	4.9e-05	10.04	9.22	GIIIspla2	CG1583	NA
FBgn0031068	1630885_at	0.568	8.623	8.9e-07	4.9e-05	8.41	8.98	Alr	CG12534	Augmenter of liver regeneration
FBgn0040992	1636268_at	-0.569	12.211	9e-07	4.9e-05	12.31	11.91	CG10570	CG10570	NA
FBgn0029795	1637326_at	0.524	7.067	9e-07	4.9e-05	6.84	7.4	CG15773	CG15773	NA
FBgn0004198	1625385_at	0.648	6.625	9.2e-07	5e-05	6.43	7.02	ct	CG11387	cut
FBgn0032216	1631050_at	0.408	11.131	9.3e-07	5e-05	10.94	11.41	CG5384	CG5384	NA
FBgn0030080	1635287_at	1.144	6.343	9.3e-07	5e-05	5.88	7.07	CG15366	CG15366	NA
FBgn0034793	1629039_at	0.493	8.903	9.4e-07	5.1e-05	8.75	9.18	asrij	CG13533	asrij
FBgn0033207	1625313_at	-0.778	6.491	9.9e-07	5.3e-05	6.66	6.1	CG12826	CG12826	NA
FBgn0085443	1629648_s_at	-0.906	7.096	1e-06	5.3e-05	7.41	6.56	spri	CG34414	sprint
FBgn0040308	1637814_s_at	0.514	9.449	1e-06	5.4e-05	9.26	9.76	Jafrac2	CG1274	thioredoxin peroxidase 2
FBgn0031114	1634714_at	0.801	8.098	1e-06	5.4e-05	7.85	8.58	cactin	CG1676	cactin
FBgn0030484	1640979_at	-0.909	11.475	1.1e-06	5.5e-05	11.76	10.92	CG1681	CG1681	NA
FBgn0015622	1627261_s_at	0.36	10.692	1.1e-06	5.6e-05	10.6	10.89	Cnx99A	CG11958	Calnexin 99A
FBgn0051678	1640130_at	0.47	9.298	1.1e-06	5.7e-05	9.16	9.58	CG31678	CG31678	NA
FBgn0030509	1641715_at	-1.4	7.315	1.1e-06	5.7e-05	7.82	6.41	CG11162	CG11162	NA
FBgn0038088	1627073_a_at	0.935	10.464	1.2e-06	5.9e-05	10.14	11.07	CG10126	CG10126	NA
FBgn0031306	1640944_at	1.315	7.021	1.2e-06	6e-05	6.6	7.82	CG4577	CG4577	NA
FBgn0037345	1637203_at	0.978	8.102	1.2e-06	6.1e-05	7.75	8.73	rev7	CG2948	rev7
FBgn0053966	1624172_at	1.007	9.674	1.3e-06	6.3e-05	9.34	10.23	CG33966	CG33966	NA
FBgn0032799	1638217_at	0.428	9.918	1.3e-06	6.3e-05	9.76	10.18	CG10166	CG10166	NA
FBgn0031768	1624890_s_at	0.336	8.794	1.3e-06	6.4e-05	8.68	8.99	CG12393	CG12393	NA
FBgn0032643	1625519_at	0.459	9.695	1.3e-06	6.4e-05	9.58	9.95	CG6453	CG6453	NA
FBgn0028694	1628531_at	0.459	11.202	1.3e-06	6.4e-05	11.01	11.5	Rpn11	CG18174	Rpn11
FBgn0036811	1637993_at	0.424	8.033	1.3e-06	6.4e-05	7.98	8.22	MED11	CG6884	Mediator complex subunit 11
FBgn0051809	1641412_at	2.438	9.298	1.3e-06	6.4e-05	8.68	10.6	CG31809	CG31809	NA
FBgn0036684	1634563_at	-0.457	9.205	1.3e-06	6.4e-05	9.41	8.89	CG3764	CG3764	NA
NA	1633036_s_at	0.606	10.188	1.3e-06	6.4e-05	10.17	10.44	NA	NA	NA
FBgn0039212	1626506_at	0.507	8.351	1.4e-06	6.5e-05	8.2	8.64	Syx18	CG13626	Syntaxin 18
FBgn0038083	1638182_at	1.569	7.124	1.4e-06	6.5e-05	6.53	8.11	CG5999	CG5999	NA
FBgn0034935	1628567_at	0.696	6.437	1.4e-06	6.5e-05	6.12	6.89	CG13565	CG13565	NA
FBgn0028692	1638876_at	0.437	11.066	1.4e-06	6.6e-05	10.9	11.34	Rpn2	CG11888	Rpn2
FBgn0041627	1625759_at	0.946	7.31	1.4e-06	6.6e-05	7.07	7.86	Ku80	CG18801	Ku80
FBgn0037291	1629027_at	0.738	5.946	1.4e-06	6.6e-05	5.75	6.36	CG14662	CG14662	NA
FBgn0037279	1638295_s_at	0.736	10.701	1.4e-06	6.6e-05	10.43	11.17	CG1129	CG1129	NA
FBgn0051719	1637054_s_at	-0.892	7.684	1.5e-06	6.8e-05	7.94	7.15	RluA-1	CG31719	RluA-1
FBgn0030676	1632707_at	0.771	7.188	1.5e-06	6.9e-05	6.87	7.65	CG12379	CG12379	NA
FBgn0037071	1627004_at	0.506	9.011	1.5e-06	6.9e-05	8.8	9.35	CG7632	CG7632	NA
FBgn0027091	1625878_at	0.407	8.341	1.5e-06	6.9e-05	8.22	8.56	Aats-cys	CG8431	Cysteinyl-tRNA synthetase
FBgn0028691	1626488_s_at	0.326	10.916	1.5e-06	6.9e-05	10.77	11.13	Rpn9	CG10230	Rpn9
FBgn0052259	1626328_at	1.049	4.754	1.5e-06	6.9e-05	4.31	5.41	CG32259	CG32259	NA
FBgn0042206	1627890_at	2.993	7.596	1.5e-06	6.9e-05	6.73	9.39	GstD10	CG18548	Glutathione S transferase D10
FBgn0038337	1625022_a_at	0.798	10.221	1.5e-06	6.9e-05	10.1	10.6	CG6125	CG6125	NA
FBgn0036984	1632238_at	0.889	4.955	1.5e-06	6.9e-05	4.65	5.51	CG13248	CG13248	NA
FBgn0039330	1623521_at	-1.213	11.165	1.5e-06	6.9e-05	11.5	10.51	CG11909	CG11909	NA
FBgn0024947	1630857_s_at	0.432	12.099	1.6e-06	6.9e-05	12.02	12.33	NTPase	CG3059	NTPase
FBgn0031069	1629413_at	-0.569	11.919	1.6e-06	7e-05	12.18	11.52	CG12703	CG12703	NA
FBgn0039254	1625565_at	0.814	7.12	1.7e-06	7.3e-05	6.84	7.6	Nmnat	CG13645	Nicotinamide mononucleotide adenylyltransferase
FBgn0035402	1630178_at	0.413	8.572	1.7e-06	7.3e-05	8.41	8.84	CG12082	CG12082	NA
FBgn0038926	1639758_at	0.487	4.307	1.7e-06	7.3e-05	4.1	4.6	CG13409	CG13409	NA
FBgn0028686	1637341_at	0.372	11.043	1.7e-06	7.3e-05	10.93	11.27	Rpt3	CG16916	Rpt3
FBgn0039538	1635219_at	0.582	7.815	1.7e-06	7.3e-05	7.65	8.13	CG12883	CG12883	NA
FBgn0011754	1623842_a_at	0.349	10.69	1.7e-06	7.3e-05	10.54	10.91	PhKgamma	CG1830	Phosphorylase kinase gamma
FBgn0038107	1626679_at	0.421	8.692	1.7e-06	7.3e-05	8.51	8.95	CG17327	CG17327	NA
FBgn0032393	1640977_at	0.417	9.754	1.7e-06	7.4e-05	9.62	10	CG12264	CG12264	NA
FBgn0051063	1637733_at	0.409	10.24	1.7e-06	7.3e-05	10.09	10.49	CG31063	CG31063	NA
FBgn0034279	1641582_at	0.842	7.708	1.7e-06	7.4e-05	7.34	8.28	CG18635	CG18635	NA
NA	1629150_at	0.399	11.704	1.7e-06	7.3e-05	11.55	11.93	NA	NA	NA
FBgn0016684	1623035_at	-0.658	7.202	1.8e-06	7.4e-05	7.44	6.79	NaPi-T	CG10207	Na[+]-dependent inorganic phosphate cotransporter
FBgn0034858	1637700_s_at	0.406	8.583	1.8e-06	7.4e-05	8.42	8.83	eIF2B-delta	CG10315	eIF2B-delta
FBgn0034184	1632187_at	0.597	8.039	1.8e-06	7.4e-05	7.81	8.42	CG9646	CG9646	NA
FBgn0033527	1635506_at	0.551	7.916	1.8e-06	7.4e-05	7.75	8.21	CG11777	CG11777	NA
FBgn0034792	1638394_at	0.39	8.451	1.8e-06	7.5e-05	8.32	8.68	CG3499	CG3499	NA
NA	1637926_s_at	0.503	9.431	1.8e-06	7.4e-05	9.21	9.76	NA	NA	NA
FBgn0039737	1625435_at	3.582	7.644	1.9e-06	7.6e-05	7.19	9.24	CG7920	CG7920	NA
FBgn0035476	1635410_at	0.899	9.391	1.9e-06	7.6e-05	8.8	10.07	CG12766	CG12766	NA
FBgn0037016	1629062_at	0.81	10.188	1.9e-06	7.6e-05	9.91	10.69	CG13252	CG13252	NA
FBgn0036290	1626801_at	0.991	9.473	1.9e-06	7.7e-05	9.11	10.13	CG10638	CG10638	NA
FBgn0029664	1633355_at	0.511	7.997	1.9e-06	7.7e-05	7.82	8.3	CG10802	CG10802	NA
FBgn0034417	1624466_a_at	0.726	8.697	1.9e-06	7.7e-05	8.38	9.18	CG15117	CG15117	NA
FBgn0033065	1634143_at	-1.507	10.541	2e-06	7.7e-05	11.03	9.63	Cyp6w1	CG8345	Cyp6w1
FBgn0033205	1634019_at	1.49	10.599	2e-06	7.7e-05	9.95	11.65	CG2064	CG2064	NA
FBgn0051909	1638603_at	-0.708	6.55	2e-06	7.7e-05	6.68	6.19	CG31909	CG31909	NA
FBgn0030351	1636902_at	0.578	8.33	2e-06	7.7e-05	8.13	8.69	CG1840	CG1840	NA
FBgn0250815	1628800_at	-0.291	14.35	2e-06	7.7e-05	14.45	14.17	Jon65Aiv	CG6467	Jonah 65Aiv
FBgn0024994	1639215_at	0.45	9.666	2e-06	7.8e-05	9.52	9.93	Csat	CG2675	Csat
FBgn0032055	1630532_at	-2.76	9.422	2e-06	7.7e-05	9.85	8.06	CG13091	CG13091	NA
FBgn0037485	1640556_at	0.834	8.696	2e-06	7.8e-05	8.36	9.25	CG14606	CG14606	NA
FBgn0250757	1638858_at	0.793	9.727	2.1e-06	8.1e-05	9.45	10.17	CG42235	CG42235	NA
FBgn0052196	1636151_at	0.73	8.252	2.1e-06	8.1e-05	8	8.67	CG32196	CG32196	NA
FBgn0014857	1627685_a_at	0.454	11.481	2.1e-06	8.2e-05	11.24	11.79	His3.3A	CG5825	Histone H3.3A
FBgn0053468	1635486_at	1.793	8	2.2e-06	8.4e-05	7.21	9.25	CG33468	CG33468	NA
FBgn0031250	1623516_s_at	-0.406	9.738	2.2e-06	8.4e-05	9.86	9.5	Ent1	CG11907	Equilibrative nucleoside transporter 1
FBgn0046302	1641038_at	0.498	13.086	2.2e-06	8.4e-05	12.91	13.39	CG10650	CG10650	NA
FBgn0038810	1631531_at	0.323	9.305	2.2e-06	8.4e-05	9.2	9.48	Srp72	CG5434	Signal recognition particle protein 72
FBgn0030263	1640185_at	0.621	10.092	2.2e-06	8.4e-05	9.88	10.46	CG2076	CG2076	NA
FBgn0036191	1638811_at	-0.779	8.281	2.3e-06	8.4e-05	8.68	7.71	Sug	CG7334	Sug
FBgn0025621	1634854_at	-0.354	7.958	2.3e-06	8.4e-05	8.09	7.74	CG16989	CG16989	NA
FBgn0026189	1641333_s_at	0.882	7.936	2.3e-06	8.5e-05	7.52	8.53	prominin-like	CG7740	prominin-like
FBgn0040827	1634002_at	-0.464	13.821	2.3e-06	8.5e-05	13.96	13.54	CG13315	CG13315	NA
FBgn0037340	1637379_at	0.489	9.417	2.3e-06	8.6e-05	9.21	9.72	CG14671	CG14671	NA
NA	1630299_at	-1.101	9.656	2.3e-06	8.6e-05	9.63	9.19	NA	NA	NA
FBgn0004908	1641687_at	0.402	8.479	2.4e-06	8.7e-05	8.31	8.74	Arf84F	CG7435	ADP ribosylation factor 84F
FBgn0004895	1625523_at	0.853	4.546	2.4e-06	8.8e-05	4.21	5.11	fd64A	CG1132	NA
FBgn0034803	1638453_at	0.346	9.837	2.5e-06	9.1e-05	9.71	10.04	CG9849	CG9849	NA
FBgn0039312	1638424_at	-1.28	11.382	2.5e-06	9.1e-05	12.07	10.43	CG10514	CG10514	NA
FBgn0038734	1626098_at	0.644	8.01	2.6e-06	9.4e-05	7.96	8.29	CG11453	CG11453	NA
NA	1641214_at	0.433	8.229	2.6e-06	9.3e-05	8.07	8.48	NA	NA	NA
FBgn0034407	1638235_at	-2.597	8.702	2.7e-06	9.5e-05	9.63	7.27	DptB	CG10794	Diptericin B
FBgn0050000	1631513_at	0.405	9.937	2.7e-06	9.5e-05	9.72	10.21	CG30000	CG30000	NA
FBgn0037396	1637072_at	1.983	6.687	2.8e-06	9.8e-05	6.03	7.81	CG11459	CG11459	NA
FBgn0028992	1631226_at	0.303	9.677	2.8e-06	9.9e-05	9.56	9.87	sds22	CG5851	sds22
FBgn0031498	1625081_at	0.458	7.58	2.8e-06	9.9e-05	7.39	7.88	CG17260	CG17260	NA
FBgn0035431	1634145_s_at	0.753	10.212	2.8e-06	0.0001	9.9	10.71	CG14968	CG14968	NA
FBgn0032693	1625114_at	0.869	5.491	2.8e-06	9.8e-05	5.07	6.1	Cyp310a1	CG10391	NA
FBgn0002787	1635259_at	0.368	10.743	2.9e-06	0.0001	10.62	10.96	Mov34	CG3416	Mov34
FBgn0038950	1637564_a_at	0.511	8.78	2.9e-06	0.0001	8.61	9.09	CG5382	CG5382	NA
FBgn0250757	1628100_at	0.935	8.399	3e-06	0.0001	8.12	8.88	CG42235	CG42235	NA
FBgn0001089	1633914_at	-1.339	10.283	3e-06	0.0001	10.69	9.45	Gal	CG9092	beta galactosidase
FBgn0031034	1634239_at	-2.061	9.415	3e-06	0.0001	10.14	8.1	CG14205	CG14205	NA
FBgn0036024	1638413_at	-1.069	13.042	3e-06	0.0001	13.25	12.48	CG18180	CG18180	NA
FBgn0035355	1633701_at	1.466	11.646	3e-06	0.0001	11.11	12.59	CG16985	CG16985	NA
NA	1624819_s_at	-1.319	9.183	3e-06	0.0001	9.47	8.54	NA	NA	NA
FBgn0036023	1630598_at	-2.152	9.246	3e-06	0.0001	9.7	8.08	CG18179	CG18179	NA
FBgn0036662	1631245_s_at	0.468	8.533	3.1e-06	0.0001	8.38	8.8	CG9706	CG9706	NA
FBgn0261394	1634820_at	0.392	11.153	3.1e-06	0.0001	10.98	11.42	Pros29	CG9327	Proteasome 29kD subunit
FBgn0001142	1632852_s_at	-0.501	11.081	3.1e-06	0.0001	11.29	10.77	Gs1	CG2718	Glutamine synthetase 1
FBgn0036553	1628821_at	0.73	8.318	3.2e-06	0.00011	8.08	8.76	CG17027	CG17027	NA
NA	1639478_at	0.436	12.011	3.3e-06	0.00011	11.88	12.27	NA	NA	NA
FBgn0037330	1632596_at	0.325	9.075	3.4e-06	0.00011	8.94	9.28	mRpL44	CG2109	mitochondrial ribosomal protein L44
FBgn0036713	1638305_at	1.013	6.498	3.4e-06	0.00011	6.16	7.1	Mip	CG6456	Myoinhibiting peptide precursor
FBgn0036381	1641270_at	-0.692	11.221	3.4e-06	0.00011	11.51	10.78	CG8745	CG8745	NA
FBgn0046692	1632946_at	-0.579	8.751	3.4e-06	0.00011	8.91	8.44	Stlk	CG40293	Ste20-like kinase
FBgn0040087	1622968_at	0.489	8.516	3.4e-06	0.00011	8.36	8.82	p115	CG1422	p115
FBgn0015541	1623503_at	1.214	10.561	3.4e-06	0.00011	10.15	11.34	sda	CG5518	slamdance
FBgn0032035	1631595_at	0.386	10.482	3.5e-06	0.00011	10.35	10.72	CG13393	CG13393	NA
FBgn0037850	1639704_at	1.175	5.19	3.5e-06	0.00011	4.78	5.95	CG14695	CG14695	NA
NA	1630614_s_at	2.339	7.058	3.5e-06	0.00011	7.06	8.04	NA	NA	NA
FBgn0011754	1624139_at	0.324	10.525	3.6e-06	0.00012	10.39	10.73	PhKgamma	CG1830	Phosphorylase kinase gamma
FBgn0039666	1638812_at	4.342	6.446	3.6e-06	0.00012	4.84	9.1	CG11501	CG11501	NA
FBgn0034035	1639358_at	0.48	8.405	3.6e-06	0.00012	8.24	8.7	CG8207	CG8207	NA
FBgn0034913	1625742_at	0.375	9.779	3.6e-06	0.00012	9.65	10.02	usnp	CG11173	ubisnap
FBgn0001128	1625949_at	-0.447	11.239	3.6e-06	0.00012	11.44	10.96	Gpdh	CG9042	Glycerol 3 phosphate dehydrogenase
FBgn0034961	1627433_at	0.367	8.788	3.6e-06	0.00012	8.61	9.02	CG3163	CG3163	NA
FBgn0035571	1623258_at	0.698	8.952	3.7e-06	0.00012	8.72	9.39	CG12493	CG12493	NA
FBgn0028685	1640710_at	0.436	10.815	3.7e-06	0.00012	10.63	11.11	Rpt4	CG3455	Rpt4
FBgn0028687	1630925_at	0.302	11.605	3.7e-06	0.00012	11.49	11.8	Rpt1	CG1341	Rpt1
FBgn0005664	1623757_at	1.2	10.163	3.7e-06	0.00012	9.66	10.97	Cry	CG16963	Crystallin
FBgn0034618	1637538_s_at	-0.509	9.48	3.8e-06	0.00012	9.62	9.18	CG9485	CG9485	NA
FBgn0031661	1628521_at	0.673	9.026	3.8e-06	0.00012	8.79	9.46	Gmd	CG8890	GDP-mannose 4%2C6-dehydratase
FBgn0033663	1631379_a_at	0.509	11.999	3.9e-06	0.00012	11.85	12.31	ERp60	CG8983	ERp60
FBgn0023129	1633488_at	-0.628	11.027	3.9e-06	0.00012	11.16	10.69	aay	CG3705	astray
FBgn0038652	1630635_s_at	-0.779	10.625	4.1e-06	0.00013	10.93	10.13	CG7720	CG7720	NA
FBgn0015075	1639264_at	0.448	7.961	4.1e-06	0.00013	7.78	8.23	Ddx1	CG9054	Dead-box-1
FBgn0013749	1624693_at	0.367	11.864	4.1e-06	0.00013	11.72	12.1	Arf102F	CG11027	ADP ribosylation factor 102F
FBgn0052284	1639457_at	1.487	9.876	4.1e-06	0.00013	9.27	10.86	CG32284	CG32284	NA
NA	1627055_at	0.857	6.301	4.1e-06	0.00013	5.9	6.88	NA	NA	NA
FBgn0015035	1623068_at	-2.732	9.195	4.7e-06	0.00014	10.02	7.66	Cyp4e3	CG4105	Cytochrome P450-4e3
FBgn0032549	1635306_at	-1.222	4.613	4.7e-06	0.00014	5.05	3.88	CG4650	CG4650	NA
FBgn0027079	1638259_s_at	0.441	8.93	4.7e-06	0.00014	8.78	9.2	Aats-val	CG4062	Valyl-tRNA synthetase
FBgn0036877	1632348_at	1.14	5.715	4.7e-06	0.00014	5.34	6.43	CG9452	CG9452	NA
FBgn0000043	1624471_s_at	0.977	12.512	4.7e-06	0.00014	12.16	13.16	Act42A	CG12051	Actin 42A
FBgn0035356	1629685_at	1.681	11.873	4.8e-06	0.00014	11.2	13	CG16986	CG16986	NA
FBgn0010383	1631300_at	-0.725	8.717	4.8e-06	0.00014	8.98	8.27	Cyp18a1	CG6816	Cytochrome P450-18a1
FBgn0026567	1634887_at	0.42	11.403	4.8e-06	0.00014	11.26	11.66	Spase18-21	CG2358	NA
FBgn0034756	1635593_at	1.447	8.918	4.9e-06	0.00015	8.48	9.79	Cyp6d2	CG4373	Cyp6d2
FBgn0038795	1638038_at	-0.691	8.822	5e-06	0.00015	9.08	8.38	CG4335	CG4335	NA
FBgn0031745	1626233_at	1.029	8.864	5e-06	0.00015	8.67	9.43	CG8965	CG8965	NA
FBgn0031497	1638642_at	0.416	10.009	5e-06	0.00015	9.87	10.25	CG17259	CG17259	NA
NA	AFFX-Dros-ACTIN_3_at	1.089	11.619	5e-06	0.00015	11.23	12.34	NA	NA	NA
FBgn0031805	1623438_at	1.073	7.028	5.1e-06	0.00015	6.69	7.69	CG9505	CG9505	NA
FBgn0010812	1640009_at	0.409	7.478	5.1e-06	0.00015	7.32	7.72	Tom34	CG2708	NA
FBgn0028540	1632019_s_at	-0.567	9.893	5.2e-06	0.00015	10.11	9.54	CG9008	CG9008	NA
FBgn0033234	1629732_at	1.566	9.973	5.2e-06	0.00015	9.44	10.96	CG8791	CG8791	NA
FBgn0040070	1629426_s_at	0.33	12.097	5.3e-06	0.00015	11.98	12.3	Trx-2	CG31884	thioredoxin-2
FBgn0040340	1635491_s_at	0.381	10.656	5.4e-06	0.00015	10.56	10.87	TRAM	CG11642	TRAM
FBgn0039682	1625122_at	-0.466	12.774	5.4e-06	0.00015	12.9	12.53	Obp99c	CG7584	Odorant-binding protein 99c
FBgn0002985	1625850_at	-1.007	8.29	5.4e-06	0.00016	8.51	7.73	odd	CG3851	odd skipped
FBgn0053126	1630593_at	-0.713	11.993	5.5e-06	0.00016	12.21	11.55	NLaz	CG33126	Neural Lazarillo
FBgn0036545	1625027_a_at	0.472	8.605	5.6e-06	0.00016	8.42	8.89	GXIVsPLA2	CG17035	GXIVsPLA2
FBgn0038449	1628818_at	-0.798	9.45	5.6e-06	0.00016	9.62	9.05	CG17562	CG17562	NA
FBgn0035529	1641058_at	0.434	10.559	5.7e-06	0.00016	10.41	10.82	CG1319	CG1319	NA
FBgn0036501	1634684_at	0.724	9.907	5.7e-06	0.00016	9.77	10.31	CG7272	CG7272	NA
FBgn0039323	1638388_at	1.833	8.168	5.8e-06	0.00016	7.72	9.15	CG10559	CG10559	NA
FBgn0016123	1636888_a_at	-0.726	10.836	5.9e-06	0.00016	11.08	10.37	Aph-4	CG1462	Alkaline phosphatase 4
FBgn0040623	1632479_at	0.489	10.551	5.9e-06	0.00016	10.35	10.87	Spase12	CG11500	Spase 12-subunit
FBgn0033401	1631304_a_at	0.457	8.704	5.9e-06	0.00016	8.56	8.97	CG1968	CG1968	NA
FBgn0021856	1624331_at	0.343	9.28	5.9e-06	0.00016	9.16	9.49	l(2)k14505	CG8674	lethal (2) k14505
FBgn0004635	1635462_at	1.59	6.502	6.1e-06	0.00017	5.96	7.56	rho	CG1004	rhomboid
FBgn0035944	1632417_a_at	0.385	10.661	6.2e-06	0.00017	10.52	10.91	CG5021	CG5021	NA
FBgn0026630	1626158_s_at	0.409	10.564	6.2e-06	0.00017	10.47	10.78	nes	CG9655	nessy
FBgn0035539	1631441_s_at	0.58	5.322	6.3e-06	0.00017	5.25	5.61	CG7447	CG7447	slowdown
FBgn0040060	1638661_at	-0.257	14.364	6.3e-06	0.00017	14.45	14.21	yip7	CG6457	yippee interacting protein 7
FBgn0046322	1631486_at	1.104	9.201	6.3e-06	0.00017	8.77	9.94	p38c	CG33338	p38c
FBgn0037847	1630886_at	-0.45	6.285	6.3e-06	0.00017	6.48	5.99	SelR	CG6584	SelR
FBgn0031815	1639346_at	-0.401	9.915	6.3e-06	0.00017	9.99	9.7	CG9526	CG9526	farjavit
FBgn0024432	1627017_at	0.374	11.181	6.4e-06	0.00017	11.02	11.42	Dlc90F	CG12363	Dynein light chain 90F
FBgn0030306	1637839_at	0.378	10.168	6.4e-06	0.00017	10.03	10.4	Spase25	CG1751	Spase 25-subunit
FBgn0002069	1629026_at	0.504	11.811	6.4e-06	0.00017	11.72	12.09	Aats-asp	CG3821	Aspartyl-tRNA synthetase
FBgn0011570	1630572_at	0.499	10.166	6.4e-06	0.00017	9.99	10.49	cpb	CG17158	capping protein beta
FBgn0052564	1633772_at	-0.925	6.188	6.4e-06	0.00017	6.31	5.74	CG32564	CG32564	NA
FBgn0027842	1626147_s_at	-0.904	11.774	6.5e-06	0.00017	12.04	11.22	CPTI	CG12891	NA
FBgn0010040	1626253_at	1.013	5.048	6.5e-06	0.00017	4.64	5.74	GstD4	CG11512	NA
FBgn0038360	1632640_at	0.384	9.187	6.6e-06	0.00018	9.1	9.39	CG9590	CG9590	NA
FBgn0026374	1634557_at	0.754	7.874	6.7e-06	0.00018	7.68	8.3	Rhp	CG8497	Rhophilin
FBgn0027496	1633785_at	0.488	10.501	6.8e-06	0.00018	10.35	10.8	epsilonCOP	CG9543	epsilonCOP
FBgn0086359	1625685_at	-1.051	5.092	6.8e-06	0.00018	5.42	4.46	Invadolysin	CG3953	Invadolysin
FBgn0033495	1633975_s_at	-0.397	10.348	6.8e-06	0.00018	10.48	10.1	CG12214	CG12214	NA
FBgn0051832	1630260_at	-1.491	7.971	6.9e-06	0.00018	8.39	7.18	CG31832	CG31832	NA
FBgn0032615	1632808_at	-0.505	4.874	6.9e-06	0.00018	5.05	4.57	CG6012	CG6012	NA
FBgn0028968	1625155_a_at	0.34	10.262	7e-06	0.00018	10.19	10.45	gammaCop	CG1528	gamma-coatomer protein
FBgn0032805	1629121_at	0.971	7.923	7e-06	0.00018	7.63	8.53	CG10337	CG10337	NA
FBgn0085485	1627596_at	-0.585	7.494	7.1e-06	0.00018	7.81	7.08	CG34456	CG34456	NA
FBgn0039821	1626577_at	0.743	9.11	7.2e-06	0.00018	8.81	9.6	CG15556	CG15556	NA
FBgn0028552	1632605_at	0.741	9.195	7.2e-06	0.00018	8.93	9.68	gammaSnap	CG3988	gamma-soluble NSF attachment protein
FBgn0029092	1638738_s_at	-0.607	10.39	7.2e-06	0.00018	10.62	10	ced-6	CG11804	ced-6
FBgn0030876	1641455_at	0.639	8.337	7.2e-06	0.00018	8.07	8.74	CG6762	CG6762	NA
FBgn0037102	1635634_at	0.289	9.149	7.2e-06	0.00018	9.03	9.33	CG7172	CG7172	NA
FBgn0030148	1624662_at	0.933	9.177	7.2e-06	0.00018	8.79	9.82	CG3106	CG3106	NA
FBgn0002641	1631688_at	0.367	8.343	7.4e-06	0.00019	8.22	8.55	mal	CG1692	maroon-like
NA	1636305_a_at	0.453	9.049	7.4e-06	0.00019	8.83	9.33	NA	NA	NA
FBgn0053469	1631521_at	1.091	7.555	7.5e-06	0.00019	7.07	8.32	CG33469	CG33469	NA
FBgn0014029	1626425_at	0.404	10.204	7.6e-06	0.00019	10.07	10.46	2002-09-01	CG4173	Septin-2
FBgn0033907	1626433_at	0.306	8.964	7.6e-06	0.00019	8.83	9.16	mRpS16	CG8338	mitochondrial ribosomal protein S16
FBgn0021795	1638890_at	0.331	12.041	7.7e-06	0.00019	11.95	12.22	Tapdelta	CG9035	Translocon-associated protein delta
FBgn0003961	1625436_at	1.676	11.249	7.7e-06	0.00019	10.88	12.21	Uro	CG7171	Urate oxidase
FBgn0037567	1628755_at	0.549	7.498	7.7e-06	0.00019	7.28	7.83	Gfr	CG9620	Gfr
FBgn0038369	1638092_a_at	0.356	9.51	7.8e-06	0.00019	9.36	9.75	Arpc3A	CG4560	Arpc3A
NA	AFFX-Dros-ACTIN_M_f_at	1.011	10.903	7.8e-06	0.00019	10.52	11.59	NA	NA	NA
FBgn0250746	1630851_s_at	0.3	11.928	7.9e-06	0.00019	11.81	12.12	Prosbeta7	CG12000	Proteasome beta7 subunit
FBgn0029134	1636559_s_at	0.303	12.004	7.9e-06	0.0002	11.88	12.2	Prosbeta5	CG12323	Proteasome beta5 subunit
FBgn0028955	1634036_at	-0.536	11.349	8.1e-06	0.0002	11.55	11	CG8788	CG8788	NA
FBgn0033215	1641125_at	-0.643	7.753	8.1e-06	0.0002	8.1	7.3	CG1942	CG1942	NA
FBgn0005586	1625838_at	1.003	5.469	8.1e-06	0.0002	5.19	6.03	Rab3	CG7576	Rab-protein 3
FBgn0026150	1627134_at	0.33	9.706	8.2e-06	0.0002	9.63	9.88	ApepP	CG6291	Aminopeptidase P
FBgn0031213	1634650_at	0.307	10.377	8.2e-06	0.0002	10.26	10.57	galectin	CG11372	galectin
FBgn0042102	1637062_at	0.659	9.578	8.2e-06	0.0002	9.44	9.94	CG18745	CG18745	NA
FBgn0040493	1636125_a_at	0.407	9.762	8.3e-06	0.0002	9.6	10	granny-smith	CG7340	granny smith
FBgn0005564	1638398_at	-0.907	7.242	8.3e-06	0.0002	7.26	6.88	Shal	CG9262	Shaker cognate l
FBgn0036667	1623214_at	0.282	10.337	8.4e-06	0.0002	10.22	10.51	CG9669	CG9669	NA
FBgn0035805	1624837_at	0.324	8.783	8.4e-06	0.0002	8.64	9	CG7506	CG7506	NA
FBgn0038319	1640252_at	0.31	9.042	8.5e-06	0.0002	8.94	9.21	mRpL9	CG31478	mitochondrial ribosomal protein L9
FBgn0027554	1624863_a_at	0.454	7.342	8.5e-06	0.0002	7.18	7.62	CG8042	CG8042	NA
FBgn0039313	1624892_s_at	-0.904	11.784	8.5e-06	0.0002	12.26	11.1	CG11892	CG11892	NA
FBgn0035756	1633793_at	0.813	6.059	8.6e-06	0.0002	5.76	6.53	unc-13-4A	CG32381	unc-13-4A
NA	AFFX-r2-Dros-GAPDH-3_at	-0.427	11.241	8.7e-06	0.00021	11.44	10.97	NA	NA	NA
FBgn0034063	1637774_s_at	-0.435	8.208	8.8e-06	0.00021	8.41	7.9	CG8389	CG8389	NA
FBgn0030692	1623678_at	0.292	9.445	8.8e-06	0.00021	9.3	9.64	mRpS30	CG8470	mitochondrial ribosomal protein S30
FBgn0024996	1630395_at	0.384	8.633	8.8e-06	0.00021	8.48	8.87	eIF2B-beta	CG2677	eIF2B-beta
FBgn0032783	1627106_a_at	-0.555	10.7	8.8e-06	0.00021	10.88	10.38	CG10237	CG10237	NA
FBgn0034915	1633284_at	0.332	9.054	8.9e-06	0.00021	8.89	9.27	eIF6	CG17611	eIF6
FBgn0047351	1629331_at	0.666	4.743	8.9e-06	0.00021	4.47	5.18	CG31468	CG31468	NA
FBgn0085265	1623532_at	1.325	10.479	8.9e-06	0.00021	9.96	11.37	CG34236	CG34236	NA
FBgn0041094	1627101_at	0.511	11.343	9e-06	0.00021	11.08	11.72	scyl	CG7590	scylla
FBgn0015591	1632752_at	0.775	9.271	9e-06	0.00021	9.09	9.69	Ast	CG13633	Allatostatin
FBgn0051133	1635895_at	0.531	7.022	9.1e-06	0.00021	6.87	7.34	CG31133	CG31133	Seryl-tRNA synthetase-like insect mitochondrial protein
FBgn0034938	1626729_at	0.409	8.113	9.3e-06	0.00022	7.97	8.34	CG3803	CG3803	NA
FBgn0020545	1634940_at	-0.493	11.165	9.4e-06	0.00022	11.32	10.86	kraken	CG3943	kraken
FBgn0034089	1630052_s_at	0.343	10.084	9.4e-06	0.00022	9.95	10.29	CG8446	CG8446	NA
NA	AFFX-Dros-ACTIN_M_r_at	1.17	10.795	9.4e-06	0.00022	10.36	11.59	NA	NA	NA
FBgn0033204	1630212_at	1.465	8.62	9.5e-06	0.00022	8.16	9.54	CG2065	CG2065	NA
FBgn0039137	1625603_at	0.616	8.759	9.9e-06	0.00023	8.58	9.13	CG13604	CG13604	NA
FBgn0039254	1635881_at	0.418	7.927	1e-05	0.00023	7.77	8.16	Nmnat	CG13645	Nicotinamide mononucleotide adenylyltransferase
FBgn0043783	1633684_at	-0.972	10.661	1e-05	0.00023	11.21	9.97	CG32444	CG32444	NA
FBgn0039316	1635512_at	0.76	10.489	1e-05	0.00023	10.25	10.93	CG11893	CG11893	NA
FBgn0031651	1638947_at	0.282	9.257	1e-05	0.00023	9.11	9.45	mRpL24	CG8849	mitochondrial ribosomal protein L24
FBgn0039678	1633305_at	-0.807	11.288	1e-05	0.00023	11.62	10.74	Obp99a	CG18111	Odorant-binding protein 99a
FBgn0011016	1634773_at	0.383	11.295	1e-05	0.00023	11.18	11.52	SsRbeta	CG5474	Signal sequence receptor beta
FBgn0030432	1630130_at	-0.325	9.823	1e-05	0.00023	9.95	9.61	CG4404	CG4404	NA
FBgn0054043	1630667_at	0.606	9.478	1e-05	0.00023	9.28	9.84	CG34043	CG34043	NA
FBgn0037847	1635788_a_at	-0.36	10.743	1.1e-05	0.00024	10.88	10.52	SelR	CG6584	SelR
FBgn0031146	1637516_at	0.775	5.448	1.1e-05	0.00024	5	6.02	CG15449	CG15449	NA
FBgn0040954	1640352_at	0.457	11.304	1.1e-05	0.00024	11.14	11.58	CG13779	CG13779	NA
FBgn0032668	1633142_at	0.794	6.782	1.1e-05	0.00024	6.49	7.29	CG17681	CG17681	NA
FBgn0010038	1630258_at	1.918	8.794	1.1e-05	0.00024	7.74	10.25	GstD2	CG4181	Glutathione S transferase D2
FBgn0035265	1631234_at	0.527	10.484	1.1e-05	0.00024	10.37	10.79	CG18173	CG18173	NA
FBgn0030060	1637125_at	0.657	9.577	1.1e-05	0.00024	9.32	10	CG2004	CG2004	NA
FBgn0052115	1623963_at	1.174	8.456	1.1e-05	0.00025	8.03	9.2	CG32115	CG32115	NA
FBgn0025725	1632109_s_at	0.419	10.137	1.1e-05	0.00025	10.05	10.37	alphaCop	CG7961	alpha-coatomer protein
FBgn0037517	1636398_at	0.731	10.081	1.1e-05	0.00025	9.86	10.53	CG10086	CG10086	NA
FBgn0040609	1625026_at	-0.972	10.779	1.1e-05	0.00025	11.02	10.21	CG3348	CG3348	NA
FBgn0035948	1632376_at	0.76	4.732	1.1e-05	0.00025	4.52	5.21	CG5644	CG5644	NA
FBgn0039849	1624246_s_at	-0.337	10.233	1.1e-05	0.00025	10.39	10.01	CG11334	CG11334	NA
FBgn0038870	1624539_at	0.391	7.725	1.1e-05	0.00025	7.57	7.97	CG5871	CG5871	O-GlcNAcase
FBgn0002732	1629601_at	0.679	6.641	1.1e-05	0.00024	6.28	7.13	malpha	CG8337	NA
NA	1626177_s_at	0.45	10.192	1.1e-05	0.00024	10.06	10.47	NA	NA	NA
FBgn0036548	1625343_at	0.396	9.173	1.2e-05	0.00025	9.09	9.39	CG5931	CG5931	NA
FBgn0026378	1631388_at	0.352	8.394	1.2e-05	0.00025	8.22	8.64	Rep	CG8432	Rab escort protein
FBgn0053494	1629181_at	-0.715	10.932	1.2e-05	0.00025	11.22	10.5	CG33494	CG33494	NA
FBgn0028688	1633594_at	0.415	10.565	1.2e-05	0.00025	10.41	10.82	Rpn7	CG5378	Rpn7
FBgn0031357	1638783_at	0.344	8.421	1.2e-05	0.00025	8.31	8.62	mRpL48	CG17642	mitochondrial ribosomal protein L48
FBgn0038716	1629428_at	-0.74	5.084	1.2e-05	0.00025	5.41	4.57	CG7342	CG7342	NA
FBgn0050420	1636451_a_at	0.787	5.026	1.2e-05	0.00025	4.68	5.49	Atf-2	CG30420	Activating transcription factor-2
FBgn0261283	1628292_s_at	0.304	10.355	1.2e-05	0.00025	10.2	10.56	HLH106	CG8522	Helix loop helix protein 106
FBgn0031449	1639286_s_at	-0.591	10.259	1.2e-05	0.00025	10.48	9.87	CG31689	CG31689	NA
FBgn0035715	1636812_at	0.571	9.796	1.2e-05	0.00026	9.63	10.15	CG10103	CG10103	NA
FBgn0035374	1632280_at	0.317	8.984	1.2e-05	0.00026	8.88	9.17	mRpS35	CG2101	mitochondrial ribosomal protein S35
FBgn0028381	1622960_at	0.67	11.758	1.2e-05	0.00026	11.49	12.22	decay	CG14902	death executioner caspase related to Apopain/Yama
FBgn0039872	1633002_at	0.484	11.162	1.2e-05	0.00025	10.79	11.56	CG2196	CG2196	NA
FBgn0035663	1629860_at	-0.951	5.839	1.2e-05	0.00025	6.27	5.2	CG6462	CG6462	NA
NA	1627314_s_at	0.583	8.308	1.2e-05	0.00025	8.09	8.66	NA	NA	NA
FBgn0014868	1625055_at	0.464	10.117	1.3e-05	0.00027	10.02	10.38	Ost48	CG9022	Oligosaccharyltransferase 48kD subunit
FBgn0035283	1639052_a_at	-0.367	9.069	1.3e-05	0.00027	9.19	8.84	CG12024	CG12024	NA
FBgn0008635	1626340_at	0.41	9.738	1.3e-05	0.00027	9.6	9.98	betaCop	CG6223	beta-coatomer protein
FBgn0032465	1633389_at	0.377	8.966	1.3e-05	0.00027	8.82	9.21	CG12404	CG12404	NA
FBgn0026380	1623021_at	0.322	11.842	1.3e-05	0.00027	11.69	12.06	Prosbeta3	CG11981	Proteasome beta3 subunit
FBgn0086712	1639259_at	0.343	7.872	1.3e-05	0.00027	7.76	8.06	Egm	CG9006	Enigma
FBgn0030839	1627400_a_at	0.559	5.816	1.3e-05	0.00027	5.61	6.16	CG5613	CG5613	NA
FBgn0030480	1625573_at	0.296	9.509	1.3e-05	0.00027	9.37	9.7	Tim9a	CG1660	Tim9a
FBgn0036298	1638994_at	0.493	10.592	1.3e-05	0.00027	10.46	10.89	CG10627	CG10627	NA
FBgn0038180	1624036_at	0.635	5.117	1.3e-05	0.00028	4.97	5.46	Cht5	CG9307	Cht5
FBgn0250843	1631376_at	0.297	11.777	1.3e-05	0.00028	11.6	12.01	Pros35	CG4904	Proteasome 35kD subunit
NA	1639054_s_at	1.128	8.226	1.3e-05	0.00027	7.94	8.89	NA	NA	NA
FBgn0028690	1639091_at	0.379	11.486	1.4e-05	0.00028	11.35	11.71	Rpn5	CG1100	Rpn5
FBgn0039205	1638216_at	0.596	8.808	1.4e-05	0.00028	8.52	9.19	CG13623	CG13623	NA
FBgn0042712	1624135_at	0.501	9.259	1.4e-05	0.00028	9.11	9.56	HBS1	CG1898	HBS1
FBgn0033786	1628581_at	0.603	11.959	1.4e-05	0.00028	11.67	12.38	CG3884	CG3884	NA
FBgn0036769	1626546_s_at	-0.415	9.557	1.4e-05	0.00028	9.68	9.31	Tsp74F	CG5492	Tetraspanin 74F
FBgn0030608	1637359_at	-0.518	11.382	1.4e-05	0.00028	11.56	11.05	Lsd-2	CG9057	Lipid storage droplet-2
FBgn0040208	1626706_at	0.706	9.404	1.4e-05	0.00028	9.21	9.84	katanin-60	CG10229	katanin 60
FBgn0027081	1640984_s_at	0.389	9.815	1.4e-05	0.00029	9.72	10.03	Aats-thr	CG5353	Threonyl-tRNA synthetase
FBgn0031533	1633709_at	-1.15	8.982	1.4e-05	0.00028	9.36	8.22	CG2772	CG2772	NA
FBgn0033297	1624914_at	-0.925	11.169	1.4e-05	0.00028	11.47	10.62	CG8690	CG8690	NA
FBgn0044812	1639323_at	5.834	8.415	1.5e-05	0.00029	6.68	12.1	TotC	CG31508	Turandot C
FBgn0029002	1637645_at	0.823	9.169	1.5e-05	0.00029	8.86	9.7	miple2	CG18321	miple2
FBgn0051390	1630318_at	0.439	8.354	1.5e-05	0.00029	8.14	8.67	MED7	CG31390	Mediator complex subunit 7
FBgn0085275	1638637_at	0.514	7.31	1.5e-05	0.00029	7.09	7.64	CG34246	CG34246	NA
FBgn0029831	1627287_at	-1.104	9.688	1.5e-05	0.0003	10	9.04	CG5966	CG5966	NA
FBgn0031930	1635065_at	-1.029	9.647	1.5e-05	0.0003	10.1	8.91	CG7025	CG7025	NA
FBgn0015316	1636611_at	-2.337	7.923	1.5e-05	0.0003	8.74	6.51	Try29F	CG9564	Trypsin 29F
FBgn0029709	1623771_at	0.318	10.416	1.5e-05	0.0003	10.31	10.6	CHOp24	CG3564	CHOp24
FBgn0027507	1627040_at	-0.348	8.905	1.5e-05	0.0003	9.03	8.7	CG1344	CG1344	NA
FBgn0003177	1637428_a_at	-0.396	9.493	1.5e-05	0.0003	9.63	9.26	pyd	CG31349	NA
FBgn0033350	1635281_at	0.395	8.704	1.6e-05	0.00031	8.6	8.92	CG8237	CG8237	NA
FBgn0016697	1641432_a_at	0.318	11.723	1.6e-05	0.00031	11.58	11.94	Prosalpha5	CG10938	Proteasome alpha5 subunit
FBgn0030799	1634788_at	0.787	7.697	1.6e-05	0.00031	7.36	8.24	CG4872	CG4872	NA
FBgn0015283	1635974_at	0.386	10.857	1.6e-05	0.00031	10.72	11.1	Pros54	CG7619	Proteasome 54kD subunit
FBgn0020637	1640975_at	-0.753	6.153	1.6e-05	0.00032	6.22	5.82	Lcp65Ag2	CG10534	Lcp65Ag2
FBgn0031836	1641169_s_at	-0.313	11.26	1.6e-05	0.00032	11.33	11.09	CG11050	CG11050	NA
FBgn0037647	1631776_at	0.454	9.589	1.6e-05	0.00032	9.45	9.87	RagA	CG11968	NA
FBgn0033886	1629266_s_at	0.277	10.845	1.6e-05	0.00032	10.73	11.02	CG13349	CG13349	NA
FBgn0040475	1630606_at	0.645	9.721	1.7e-05	0.00032	9.51	10.14	SH3PX1	CG6757	SH3PX1
FBgn0035589	1635521_at	0.401	8.699	1.7e-05	0.00032	8.56	8.95	CG4618	CG4618	Charged multivesicular body protein 2b
FBgn0010241	1638775_at	-1.134	8.824	1.7e-05	0.00033	9.42	7.98	Mdr50	CG8523	Multi drug resistance 50
FBgn0036419	1636798_at	0.346	13.169	1.7e-05	0.00033	13.06	13.37	CG13482	CG13482	NA
FBgn0086446	1626156_at	0.411	8.834	1.8e-05	0.00034	8.62	9.11	l(2)37Ce	CG17347	lethal (2) 37Ce
FBgn0041160	1635336_at	1.024	7.848	1.8e-05	0.00034	7.41	8.54	comm2	CG7554	comm2
FBgn0031012	1636747_at	0.507	9.203	1.8e-05	0.00034	8.98	9.54	CG8051	CG8051	NA
FBgn0000042	1626163_s_at	0.443	13.401	1.8e-05	0.00035	13.24	13.69	Act5C	CG4027	Actin 5C
FBgn0031635	1636654_s_at	-0.298	10.417	1.8e-05	0.00035	10.53	10.24	CG15626	CG15626	NA
FBgn0001202	1628673_at	0.299	9.019	1.8e-05	0.00035	8.92	9.2	hk	CG10653	hook
NA	AFFX-r2-Dros-Act5C-5_at	0.692	10.23	1.8e-05	0.00034	9.98	10.69	NA	NA	NA
NA	AFFX-r2-Dros-Act5C-3_s_at	0.443	13.444	1.8e-05	0.00034	13.3	13.73	NA	NA	NA
FBgn0011754	1632955_at	0.376	9.692	1.9e-05	0.00036	9.54	9.92	PhKgamma	CG1830	Phosphorylase kinase gamma
FBgn0037778	1636340_at	0.284	7.213	1.9e-05	0.00035	7.15	7.36	mtTFB2	CG3910	mitochondrial transcription factor B2
FBgn0032140	1634978_at	1.497	8.898	1.9e-05	0.00036	8.31	9.92	CG13117	CG13117	NA
FBgn0030460	1639328_at	0.374	7.794	1.9e-05	0.00036	7.66	8.02	CG2453	CG2453	NA
FBgn0035926	1638246_at	0.249	14.138	1.9e-05	0.00036	14.03	14.3	CG5804	CG5804	NA
FBgn0034261	1640577_a_at	-0.409	8.15	1.9e-05	0.00036	8.34	7.87	CG4966	CG4966	Hermansky-Pudlak Syndrome 4 ortholog
FBgn0039626	1624639_at	0.372	7.62	1.9e-05	0.00036	7.52	7.81	Slu7	CG1420	Slu7
FBgn0037357	1628598_s_at	0.425	9.646	1.9e-05	0.00036	9.51	9.89	sec23	CG1250	NA
FBgn0010638	1627382_at	0.287	12.437	2e-05	0.00036	12.36	12.6	Sec61beta	CG10130	Sec61beta
FBgn0033188	1638498_s_at	-0.449	11.624	2e-05	0.00036	11.62	11.45	CG1600	CG1600	NA
FBgn0031801	1623706_at	0.676	10.018	2e-05	0.00036	9.88	10.4	CG9498	CG9498	NA
FBgn0035246	1637150_at	0.964	5.312	2e-05	0.00036	4.94	5.9	CG13928	CG13928	NA
FBgn0051778	1636682_at	-0.695	8.683	2e-05	0.00037	8.97	8.24	CG31778	CG31778	NA
FBgn0086911	1628143_a_at	0.445	9.437	2e-05	0.00037	9.29	9.71	rg	CG6775	rugose
FBgn0028940	1629009_at	1.307	9.363	2e-05	0.00037	8.94	10.18	Cyp28a5	CG8864	Cyp28a5
NA	1641367_at	0.652	9.478	2e-05	0.00037	9.32	9.84	NA	NA	NA
FBgn0036831	1625487_at	-0.923	9.905	2e-05	0.00037	10.32	9.31	CG6839	CG6839	NA
NA	1640043_s_at	-0.387	8.829	2e-05	0.00036	8.93	8.61	NA	NA	NA
FBgn0024361	1626767_at	0.615	11.746	2.1e-05	0.00038	11.48	12.18	Tsp2A	CG11415	Tetraspanin 2A
FBgn0039328	1638852_at	0.598	7.48	2.1e-05	0.00038	7.19	7.89	CHKov2	CG10675	CHKov2
FBgn0033434	1628929_s_at	0.571	11.214	2.1e-05	0.00038	11.04	11.58	CG1902	CG1902	NA
FBgn0036199	1638414_a_at	-0.464	8.665	2.1e-05	0.00038	8.91	8.34	Bmcp	CG7314	Bmcp
FBgn0010014	1641460_at	1.1	4.904	2.1e-05	0.00038	4.49	5.61	CanB	CG4209	Calcineurin B
FBgn0031781	1636770_at	0.428	11.279	2.1e-05	0.00038	11.1	11.57	Arc-p20	CG5972	Arc-p20
FBgn0039208	1629776_a_at	0.793	8.939	2.1e-05	0.00039	8.64	9.44	CG6643	CG6643	NA
FBgn0086444	1635225_at	0.263	6.479	2.2e-05	0.00039	6.38	6.64	l(2)37Cb	CG10689	lethal (2) 37Cb
FBgn0038953	1634222_at	0.687	7.882	2.2e-05	0.00039	7.76	8.27	CG18596	CG18596	NA
FBgn0000318	1623936_at	0.368	11.658	2.2e-05	0.00039	11.55	11.87	cl	CG11024	clot
FBgn0053169	1641489_at	0.317	8.197	2.2e-05	0.00039	8.12	8.36	CG33169	CG33169	NA
FBgn0033191	1639416_at	0.299	9.707	2.2e-05	0.00039	9.59	9.89	CG1598	CG1598	NA
FBgn0039349	1635280_at	0.517	9.587	2.2e-05	0.00039	9.39	9.91	Ssadh	CG4685	Succinic semialdehyde dehydrogenase
FBgn0027550	1626911_at	0.754	5.903	2.2e-05	0.00039	5.7	6.32	CG6495	CG6495	NA
FBgn0030230	1639837_at	0.79	3.965	2.2e-05	0.0004	3.6	4.5	Rph	CG11556	Rabphilin
NA	1633491_s_at	0.336	8.126	2.2e-05	0.0004	7.98	8.34	NA	NA	NA
NA	1634204_at	0.504	9.749	2.2e-05	0.00039	9.56	10.09	NA	NA	NA
FBgn0035169	1629606_at	-0.37	9.325	2.3e-05	0.0004	9.47	9.09	CG13890	CG13890	NA
FBgn0020764	1632343_at	0.33	11.575	2.3e-05	0.0004	11.42	11.8	Alas	CG3017	Aminolevulinate synthase
FBgn0038257	1635450_a_at	-0.845	10.386	2.3e-05	0.0004	10.47	9.96	smp-30	CG7390	Senescence marker protein-30
FBgn0027088	1636948_a_at	0.335	9.31	2.3e-05	0.00041	9.23	9.51	Aats-gly	CG6778	Glycyl-tRNA synthetase
FBgn0032412	1626524_at	-0.639	10.249	2.3e-05	0.0004	10.34	9.92	CG16996	CG16996	NA
NA	AFFX-r2-Dros-Act5C-5_x_at	0.66	10.756	2.3e-05	0.00041	10.5	11.19	NA	NA	NA
NA	AFFX-Dros-ACTIN_5_at	1.271	9.172	2.3e-05	0.0004	8.71	10.01	NA	NA	NA
NA	1626257_at	-0.531	6.121	2.3e-05	0.00041	6.31	5.82	NA	NA	NA
FBgn0033038	1632180_at	0.345	8.575	2.4e-05	0.00042	8.44	8.78	CG7791	CG7791	NA
FBgn0051950	1639522_at	0.463	8.041	2.4e-05	0.00042	7.86	8.34	CG31950	CG31950	NA
FBgn0050281	1634192_at	-0.774	8.179	2.4e-05	0.00042	8.47	7.69	CG30281	CG30281	NA
FBgn0031378	1639111_at	0.355	7.613	2.4e-05	0.00042	7.48	7.82	CG15362	CG15362	NA
FBgn0013998	1639023_at	0.355	8.955	2.4e-05	0.00042	8.84	9.17	Nsf2	CG33101	NEM-sensitive fusion protein 2
FBgn0037490	1628507_at	0.425	6.49	2.4e-05	0.00042	6.37	6.73	CG10053	CG10053	NA
FBgn0039596	1638273_at	0.807	6.656	2.4e-05	0.00041	6.39	7.18	CG10000	CG10000	NA
FBgn0259682	1633076_at	-0.863	11.033	2.5e-05	0.00043	11.31	10.51	CG42351	CG42351	NA
FBgn0031478	1640698_at	-0.305	10.1	2.5e-05	0.00042	10.18	9.92	CG8814	CG8814	NA
FBgn0035886	1625538_at	0.952	11.787	2.5e-05	0.00042	11.44	12.35	Jon66Ci	CG7118	Jonah 66Ci
FBgn0083972	1626759_at	-0.894	8.475	2.5e-05	0.00043	8.65	8.06	CG34136	CG34136	NA
FBgn0028388	1629012_at	0.424	11.415	2.5e-05	0.00042	11.26	11.7	capt	CG33979	NA
NA	1626314_at	0.276	10.979	2.5e-05	0.00042	10.87	11.15	NA	NA	NA
FBgn0011225	1623185_s_at	0.408	10.084	2.6e-05	0.00044	9.94	10.33	jar	CG5695	jaguar
FBgn0086357	1638663_at	0.344	11.196	2.6e-05	0.00045	11.08	11.4	Sec61alpha	CG9539	Sec61alpha
FBgn0034942	1624144_at	-0.457	4.932	2.6e-05	0.00044	4.97	4.72	CG13566	CG13566	NA
FBgn0022073	1635900_at	-0.402	12.719	2.6e-05	0.00044	12.89	12.44	Thor	CG8846	NA
FBgn0015765	1636173_s_at	0.379	9.986	2.7e-05	0.00045	9.83	10.24	Mpk2	CG5475	Mpk2
FBgn0038717	1630528_at	-0.714	9.003	2.7e-05	0.00045	9.49	8.42	CG17751	CG17751	NA
FBgn0027584	1638021_at	-1.012	8.028	2.7e-05	0.00045	8.4	7.39	CG4757	CG4757	NA
FBgn0033924	1632731_at	-0.28	8.467	2.7e-05	0.00046	8.58	8.28	CG8613	CG8613	NA
FBgn0037609	1635637_at	0.415	8.826	2.7e-05	0.00046	8.61	9.11	CG9773	CG9773	NA
FBgn0034389	1633447_at	-0.44	8.689	2.7e-05	0.00046	8.79	8.44	Mctp	CG15078	Multiple C2 domain and transmembrane region protein
FBgn0052177	1636837_at	0.423	9.254	2.8e-05	0.00046	9.17	9.48	CG32177	CG32177	NA
FBgn0032781	1639553_at	0.411	8.521	2.8e-05	0.00046	8.43	8.76	CG9987	CG9987	NA
FBgn0033480	1625392_at	0.31	9.13	2.8e-05	0.00046	8.96	9.33	mRpL42	CG12921	mitochondrial ribosomal protein L42
FBgn0026371	1629805_at	0.577	4.614	2.8e-05	0.00046	4.44	4.97	SAK	CG7186	Sak kinase
FBgn0000083	1626707_a_at	0.521	11.377	2.8e-05	0.00046	11.17	11.73	AnnIX	CG5730	Annexin IX
FBgn0025373	1628428_at	0.43	10.3	2.8e-05	0.00046	10.13	10.58	Fpps	CG12389	Farnesyl pyrophosphate synthase
FBgn0028327	1626456_at	0.342	10.594	2.8e-05	0.00046	10.45	10.81	l(1)G0320	CG32701	lethal (1) G0320
FBgn0032652	1629324_at	-1.254	9.008	2.8e-05	0.00047	9.35	8.3	CG6870	CG6870	NA
NA	1636501_at	0.397	13.123	2.8e-05	0.00047	13.03	13.35	NA	NA	NA
FBgn0033241	1641215_s_at	0.281	9.777	2.9e-05	0.00047	9.63	9.97	CG2915	CG2915	NA
FBgn0031998	1625857_at	-0.687	10.317	2.9e-05	0.00047	10.6	9.84	CG8451	CG8451	NA
FBgn0004132	1623599_at	0.272	8.777	2.9e-05	0.00047	8.7	8.93	boca	CG30498	boca
FBgn0037146	1637154_at	-0.601	11.461	2.9e-05	0.00047	11.65	11.08	CG7470	CG7470	NA
FBgn0036615	1641223_at	0.335	8.233	2.9e-05	0.00047	8.19	8.39	CG4933	CG4933	NA
FBgn0015575	1637255_a_at	-0.639	10.82	2.9e-05	0.00047	11.05	10.41	alpha-Est7	CG1112	alpha-Esterase-7
FBgn0086686	1629496_at	-0.245	9.458	2.9e-05	0.00048	9.54	9.31	l(3)L1231	CG7832	lethal (3) L1231
NA	1633572_at	0.463	8.891	2.9e-05	0.00047	8.71	9.18	NA	NA	NA
FBgn0034564	1628560_at	0.483	9.077	3e-05	0.00048	8.87	9.38	CG9344	CG9344	NA
FBgn0026602	1641062_at	0.527	8.086	3e-05	0.00048	8.12	8.24	Ady43A	CG1851	Ady43A
FBgn0034578	1629692_at	0.365	6.335	3e-05	0.00049	6.27	6.5	CG15653	CG15653	NA
FBgn0024891	1627939_a_at	0.416	9.416	3.1e-05	0.0005	9.26	9.66	ferrochelatase	CG2098	ferrochelatase
FBgn0037378	1638342_at	0.267	10.133	3.1e-05	0.0005	10.02	10.3	CG2046	CG2046	NA
FBgn0053111	1630807_at	0.704	8.224	3.1e-05	0.0005	7.95	8.71	CG33111	CG33111	NA
FBgn0020508	1629199_at	0.887	11.875	3.1e-05	0.0005	11.44	12.43	Ag5r2	CG9540	Antigen 5-related 2
FBgn0038976	1640995_at	0.245	10.414	3.1e-05	0.0005	10.29	10.59	CG7048	CG7048	NA
FBgn0039450	1638670_a_at	0.399	9.444	3.1e-05	0.0005	9.31	9.67	CG5484	CG5484	NA
NA	AFFX-r2-Dros-Act5C-M_s_at	0.554	11.393	3.1e-05	0.0005	11.17	11.77	NA	NA	NA
FBgn0039611	1639530_at	-0.765	6.377	3.2e-05	0.00051	6.6	5.9	CG14528	CG14528	NA
FBgn0040064	1636180_at	0.354	11.384	3.2e-05	0.00051	11.23	11.6	yip2	CG4600	yippee interacting protein 2
FBgn0035264	1629688_at	0.497	7.134	3.2e-05	0.00051	6.96	7.44	Oseg4	CG2069	NA
NA	1624571_s_at	0.34	9.821	3.2e-05	0.0005	9.65	10.04	NA	NA	NA
FBgn0031779	1628795_s_at	0.3	7.824	3.3e-05	0.00052	7.73	8	CG9175	CG9175	NA
FBgn0023541	1627180_at	-1.358	8.454	3.3e-05	0.00052	8.91	7.59	Cyp4d14	CG3540	Cyp4d14
FBgn0031643	1633622_at	0.648	8.951	3.3e-05	0.00052	8.74	9.38	CG3008	CG3008	NA
FBgn0035346	1637605_s_at	0.482	9.17	3.3e-05	0.00052	9.04	9.47	CG1146	CG1146	NA
FBgn0028693	1640372_at	0.334	11.079	3.3e-05	0.00052	10.93	11.3	Rpn12	CG4157	Rpn12
FBgn0015816	1636044_at	0.441	8.692	3.3e-05	0.00052	8.57	8.96	Slh	CG3539	SLY-1 homologous
NA	1638635_at	0.292	8.15	3.3e-05	0.00052	8.03	8.33	NA	NA	NA
FBgn0036551	1639911_at	0.423	10.412	3.4e-05	0.00053	10.23	10.67	CG17029	CG17029	NA
FBgn0028396	1635549_at	4.674	10.192	3.4e-05	0.00053	8.89	13.08	TotA	CG31509	Turandot A
FBgn0032840	1624838_a_at	0.786	4.142	3.4e-05	0.00053	3.88	4.61	sNPF	CG13968	short neuropeptide F precursor
NA	1635910_at	-0.261	9.635	3.4e-05	0.00054	9.68	9.51	NA	NA	NA
FBgn0040237	1628099_at	0.246	9.901	3.5e-05	0.00054	9.79	10.06	bor	CG6815	belphegor
FBgn0086443	1624475_at	0.27	9.554	3.5e-05	0.00054	9.44	9.73	Aats-asn	CG10687	Asparaginyl-tRNA synthetase
FBgn0016762	1625019_at	0.395	7.366	3.5e-05	0.00054	7.23	7.61	angel	CG12273	angel
FBgn0038678	1623012_at	0.31	9.328	3.5e-05	0.00054	9.17	9.54	mRpL55	CG14283	mitochondrial ribosomal protein L55
FBgn0030073	1628935_at	0.632	7.616	3.5e-05	0.00054	7.42	7.96	CG10962	CG10962	NA
FBgn0027558	1637584_at	0.919	9.325	3.5e-05	0.00054	9	9.94	pgant3	CG4445	polypeptide GalNAc transferase 3
FBgn0038327	1627794_a_at	0.425	7.556	3.6e-05	0.00055	7.49	7.77	Trax	CG5063	Translin associated factor X
FBgn0034697	1632677_a_at	0.293	9.788	3.6e-05	0.00056	9.71	9.96	GM130	CG11061	GM130
FBgn0023175	1634795_a_at	0.284	11.236	3.6e-05	0.00056	11.1	11.43	Prosalpha7	CG1519	Proteasome alpha7 subunit
FBgn0039755	1638528_at	-0.357	11.007	3.7e-05	0.00056	11.09	10.82	CG15531	CG15531	NA
FBgn0036487	1633113_at	0.38	8.198	3.7e-05	0.00057	8.07	8.44	CG6876	CG6876	NA
FBgn0011722	1634546_at	-0.614	7.666	3.7e-05	0.00057	7.87	7.32	Tig	CG11527	Tiggrin
FBgn0000472	1625856_at	-0.361	10.815	3.7e-05	0.00057	10.99	10.55	dm	CG10798	NA
FBgn0034113	1628091_at	0.45	5.966	3.8e-05	0.00057	5.78	6.24	CG8060	CG8060	NA
FBgn0086679	1625934_at	-0.354	8.443	3.8e-05	0.00058	8.58	8.23	p	CG9770	pink
FBgn0037293	1638354_at	0.409	9.912	3.8e-05	0.00058	9.79	10.17	CG12007	CG12007	NA
FBgn0030887	1624485_at	-0.529	7.812	3.8e-05	0.00058	7.94	7.53	CG6867	CG6867	NA
FBgn0033113	1634958_at	0.608	7.475	3.8e-05	0.00058	7.29	7.85	CG9455	CG9455	Serpin 42Dc
FBgn0036819	1637720_at	0.328	7.258	3.8e-05	0.00058	7.12	7.46	CG6856	CG6856	dysbindin
FBgn0032381	1638508_at	-1.661	9.314	3.8e-05	0.00058	9.85	8.33	CG14934	CG14934	Maltase B1
FBgn0033033	1640912_s_at	-0.677	6.435	3.9e-05	0.00058	6.64	6.09	scarface	CG11066	scarface
FBgn0051715	1633260_at	0.48	10.326	3.9e-05	0.00059	10.1	10.66	CG31715	CG31715	NA
FBgn0033778	1624106_at	1.042	5.881	3.9e-05	0.00059	5.59	6.52	CG3790	CG3790	NA
FBgn0011204	1633400_at	-0.379	10.68	3.9e-05	0.00059	10.8	10.46	cue	CG12086	cueball
FBgn0036945	1633446_s_at	0.524	12.501	4e-05	0.00059	12.29	12.86	CG6981	CG6981	NA
FBgn0031381	1625334_at	0.508	11.241	4e-05	0.0006	11.04	11.59	Npc2a	CG7291	Niemann-Pick type C-2a
FBgn0036135	1624278_at	0.315	8.362	4e-05	0.0006	8.26	8.56	mRpL2	CG7636	mitochondrial ribosomal protein L2
FBgn0034367	1638795_at	0.336	7.9	4e-05	0.0006	7.79	8.11	sec6	CG5341	sec6
FBgn0037315	1629233_s_at	-0.313	8.621	4e-05	0.0006	8.74	8.43	CG16708	CG16708	Ceramide kinase
FBgn0033786	1638816_at	0.643	9.87	4.1e-05	0.0006	9.63	10.29	CG3884	CG3884	NA
FBgn0003067	1633599_a_at	-0.566	13.245	4.1e-05	0.0006	13.41	12.91	Pepck	CG17725	Phosphoenolpyruvate carboxykinase
FBgn0038916	1638592_at	0.528	8.596	4.1e-05	0.00061	8.42	8.9	dnd	CG6560	dead end
FBgn0035154	1632584_at	0.481	12.603	4.1e-05	0.00061	12.4	12.92	CG3344	CG3344	NA
FBgn0052099	1633677_at	0.608	7.062	4.1e-05	0.00061	6.9	7.42	eap	CG32099	ebony activating protein
FBgn0032124	1639990_at	0.625	7.969	4.1e-05	0.0006	7.73	8.37	CG17855	CG17855	NA
NA	1632834_a_at	0.345	9.99	4.1e-05	0.00061	9.85	10.21	NA	NA	NA
FBgn0036996	1636583_at	-1.275	12.013	4.2e-05	0.00061	12.49	11.14	CG5932	CG5932	NA
FBgn0030433	1623859_at	0.248	9.717	4.2e-05	0.00061	9.61	9.87	mRpL49	CG4647	mitochondrial ribosomal protein L49
FBgn0040260	1641191_s_at	0.676	10.487	4.2e-05	0.00061	10.38	10.77	Ugt36Bc	CG17932	Ugt36Bc
FBgn0027544	1636293_at	-1.411	7.71	4.2e-05	0.00061	8.3	6.91	CG2217	CG2217	NA
FBgn0040942	1628696_at	-0.84	8.354	4.2e-05	0.00061	8.61	7.83	CG12643	CG12643	NA
FBgn0004456	1634290_a_at	0.643	7.195	4.2e-05	0.00062	6.94	7.62	mew	CG1771	multiple edematous wings
FBgn0028835	1624894_s_at	0.268	9.748	4.2e-05	0.00061	9.65	9.91	CSN8	CG42522	NA
NA	1635927_at	0.266	7.181	4.2e-05	0.00061	7.09	7.33	NA	NA	NA
FBgn0024973	1626169_at	0.354	8.233	4.3e-05	0.00062	8.12	8.45	CG2701	CG2701	NA
FBgn0034854	1623264_at	0.357	8.676	4.3e-05	0.00062	8.56	8.89	CG3493	CG3493	NA
FBgn0035631	1627497_at	0.247	10.791	4.3e-05	0.00062	10.67	10.96	Txl	CG5495	Thioredoxin-like
FBgn0051694	1637307_at	0.276	10.24	4.3e-05	0.00062	10.1	10.42	CG31694	CG31694	NA
FBgn0036573	1630543_at	0.407	8.372	4.3e-05	0.00062	8.22	8.61	CG5161	CG5161	NA
FBgn0036314	1624603_at	0.291	9.228	4.3e-05	0.00063	9.13	9.41	CG10754	CG10754	NA
NA	1632712_s_at	0.358	12.098	4.3e-05	0.00062	11.96	12.33	NA	NA	NA
FBgn0050338	1640499_at	0.382	6.469	4.4e-05	0.00063	6.37	6.67	CG30338	CG30338	NA
FBgn0036000	1623875_at	0.477	7.725	4.4e-05	0.00064	7.59	7.99	CG3434	CG3434	NA
NA	1623569_at	0.937	8.822	4.4e-05	0.00064	8.48	9.44	NA	NA	NA
FBgn0036288	1630113_at	0.616	7.906	4.5e-05	0.00064	7.66	8.32	CG10660	CG10660	NA
FBgn0034406	1625587_at	0.401	10.742	4.5e-05	0.00064	10.58	10.97	Jheh3	CG15106	Juvenile hormone epoxide hydrolase 3
FBgn0003888	1639503_at	0.854	11.064	4.5e-05	0.00064	10.66	11.67	betaTub60D	CG3401	beta-Tubulin at 60D
FBgn0069242	1629234_at	0.259	11.122	4.5e-05	0.00064	11.06	11.27	eca	CG33104	eclair
NA	1636104_at	0.495	6.349	4.5e-05	0.00064	6.23	6.59	NA	NA	NA
NA	1628037_at	0.32	6.254	4.5e-05	0.00064	6.09	6.46	NA	NA	NA
[truncated: 9,081 more rows]
[truncated: 4 more columns]

## Sheet: totalRNA_LongLivedMutant-Driver
Ensembl.Gene.ID	ID	logFC	AveExpr	P.Value	adj.P.Val	driverControl_Mean	longLivedMutant_Mean	symbols	FLYBASECG	Description
[truncated: 9,766 more rows]
[truncated: 3 more columns]
